# Supplementary material for: Massively parallel cis-regulatory analysis in the mammalian central nervous system
Source: PubMed Central journal article supplement — Genome Res. 2016 Feb;26(2):238–55. doi: 10.1101/gr.193789.115 (PMC4728376; doi:10.1101/gr.193789.115), 2016-02
Supplement: supp_gr.193789.115_Supp_Fig1.pdf [file supp_gr.193789.115_Supp_Fig1.pdf]

A

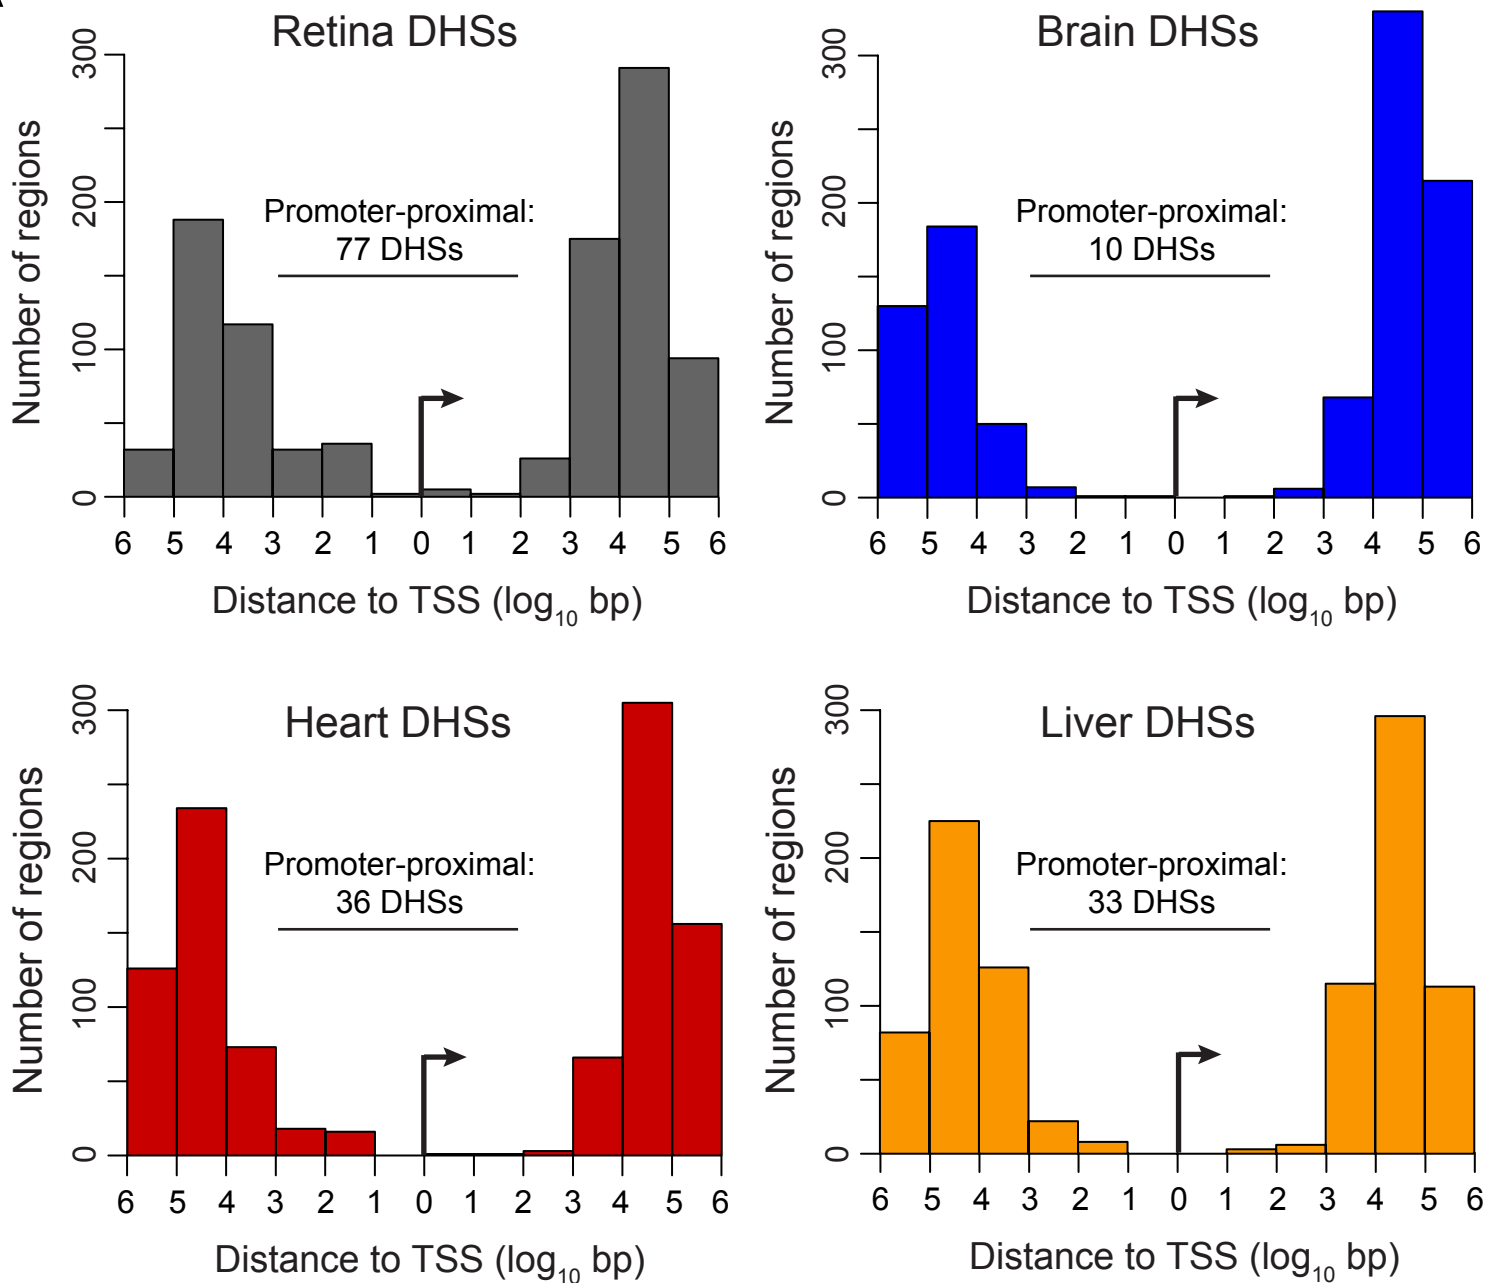

B

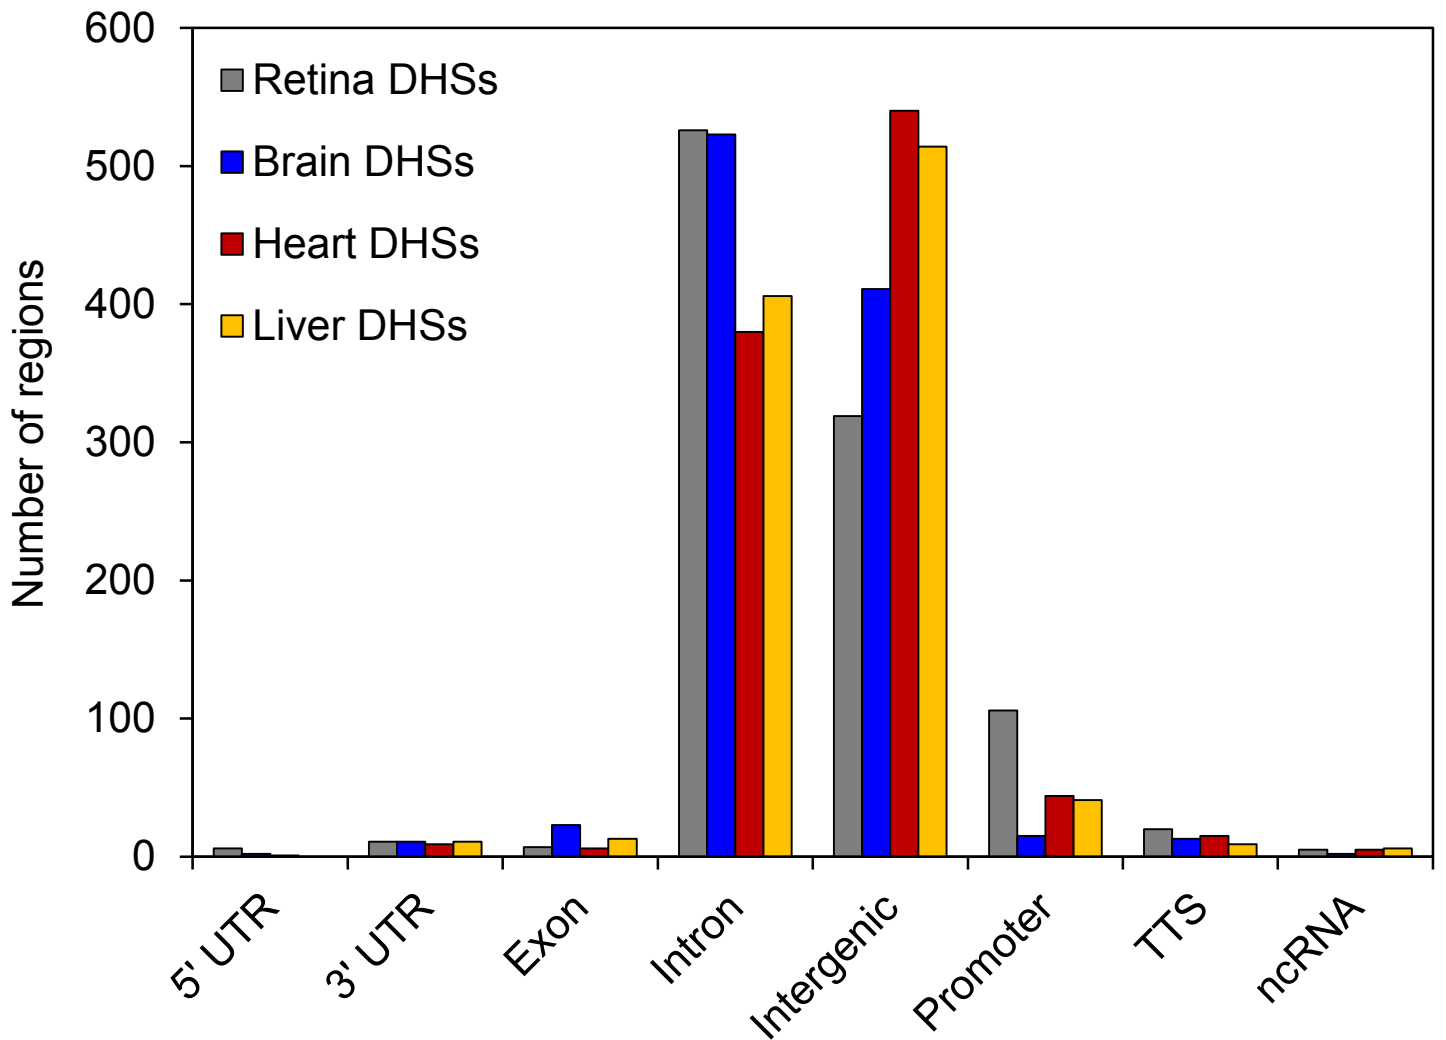

**Supplemental Figure S1. Distribution of 4,000 target DHS regions.** (A) Histogram showing the locations of the target regions (up- or downstream) relative to the nearest transcriptional start site (TSS, indicated by arrow) based on GREAT analysis (McLean et al. 2010). The number of 'promoter-proximal' DHSs for each group is shown, as defined by DHSs that fell within -1 kb to +100 bp relative to the nearest TSS. (B) Histogram showing the basic annotations for the target regions, based on HOMER (Heinz et al. 2010). Abbreviations: UTR, untranslated region; TTS, transcription termination site; ncRNA, non-coding RNA.
