# Supplementary material for: Massively parallel cis-regulatory analysis in the mammalian central nervous system
Source: PubMed Central journal article supplement — Genome Res. 2016 Feb;26(2):238–55. doi: 10.1101/gr.193789.115 (PMC4728376; doi:10.1101/gr.193789.115), 2016-02
Supplement: supp_gr.193789.115_Supp_Fig2.pdf [file supp_gr.193789.115_Supp_Fig2.pdf]

A

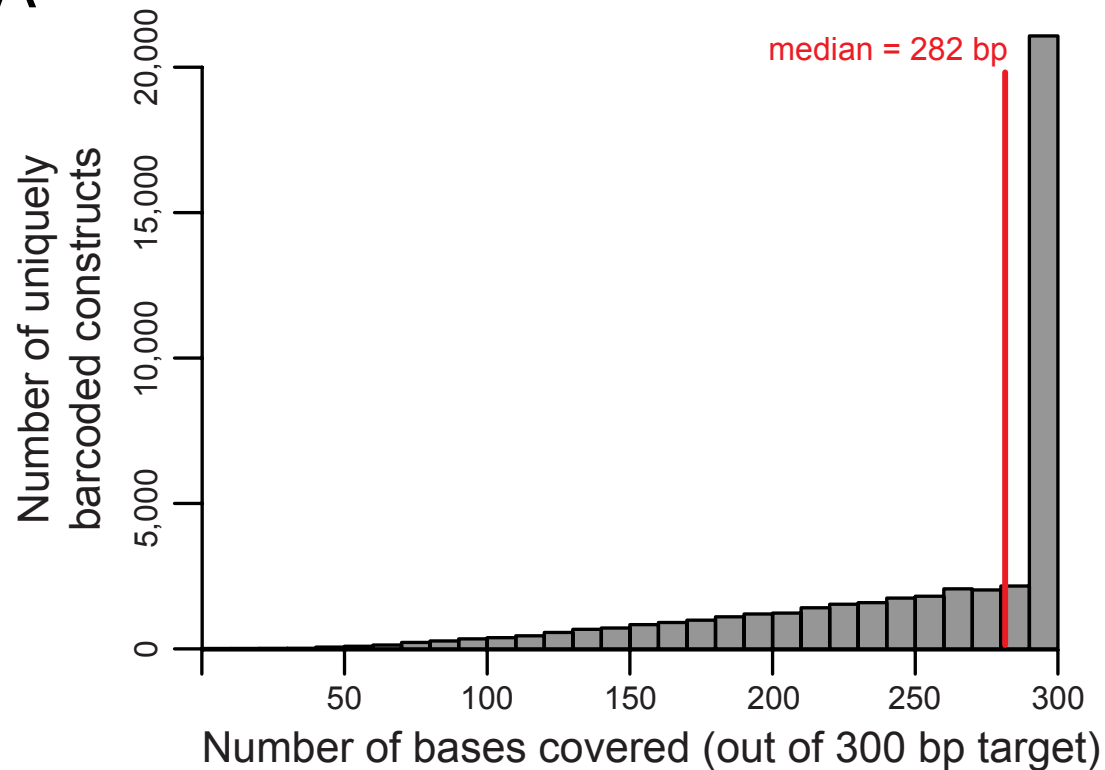

B

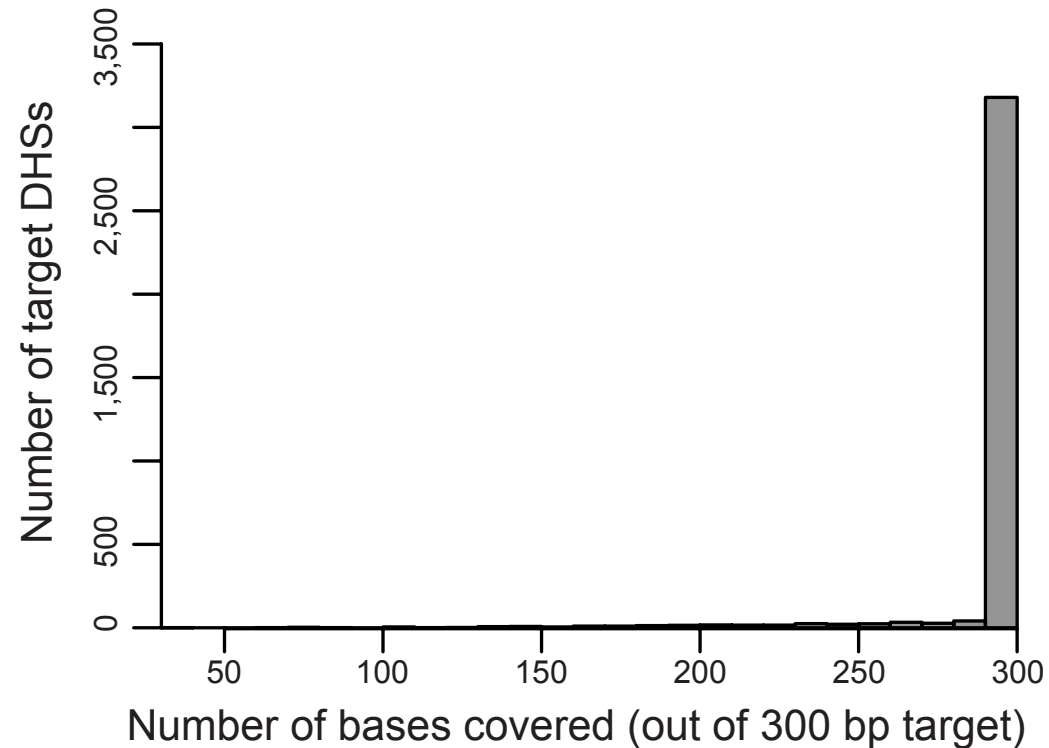

**Supplemental Figure S2. Distribution of overlap of captured fragments with target DHS regions.** Each target DHS was 300 bp. (A) Histogram showing the distribution of the overlap between targets and captured fragments for all 45,670 uniquely barcoded constructs. The median number of bases of overlap was 282 bp. (B) Histogram showing the distribution of the overall overlap between all 3,483 represented target regions and the captured fragments, based on the union of the captured fragments. Fragments collectively tiled at least 200 bp out of the 300 bp target for 3,402/3,483 (98%) target regions, and the entire 300 bp target for 3,146/3,483 (90%) target regions.
