# Supplementary material for: Massively parallel cis-regulatory analysis in the mammalian central nervous system
Source: PubMed Central journal article supplement — Genome Res. 2016 Feb;26(2):238–55. doi: 10.1101/gr.193789.115 (PMC4728376; doi:10.1101/gr.193789.115), 2016-02
Supplement: supp_gr.193789.115_Supp_Fig3.pdf [file supp_gr.193789.115_Supp_Fig3.pdf]

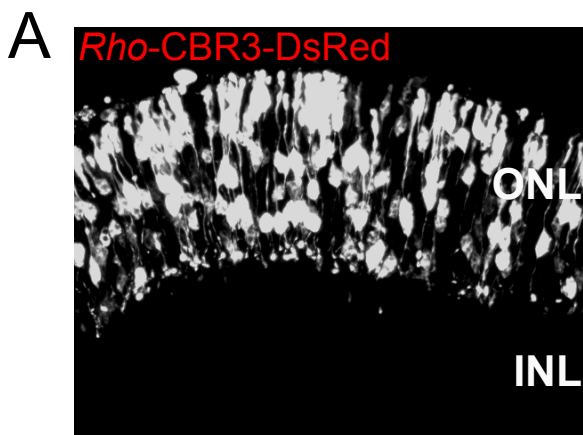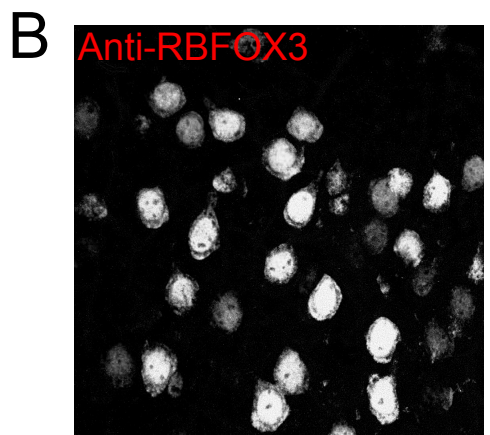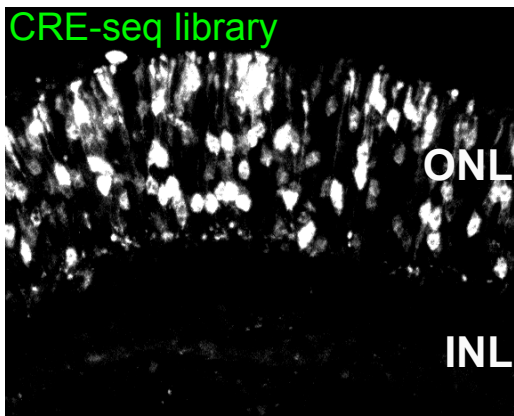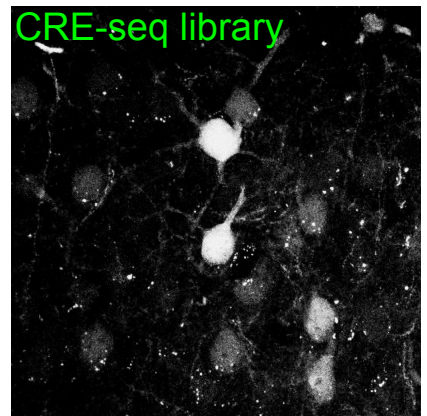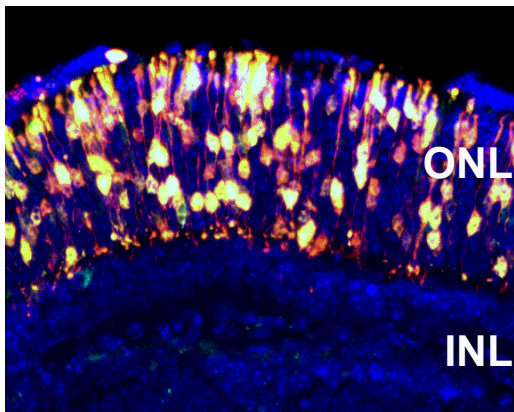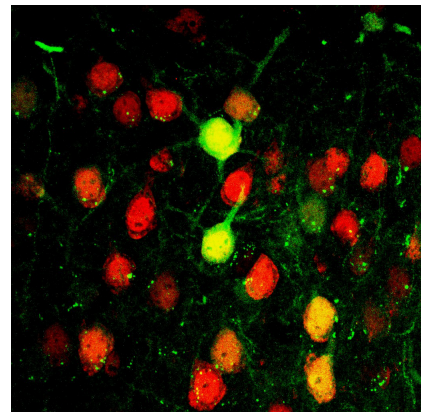

**Supplemental Figure S3. Co-expression of the library and cellular markers.** (A) Same retina as in Figure 3C, but a wider field and additional channels are shown. The library contains a GFP reporter. *Rho-CBR3-DsRed* is a rod-specific reporter (Corbo et al. 2010) that was coelectroporated with the library. Colocalization of DsRed and GFP indicates expression of the library in rods. Blue channel in merged image is DAPI, a nuclear counterstain. (B) Antibody staining of the neuronal marker RBFOX3 (also known as NeuN) (red channel) (Mullen et al. 1992) in a region of cerebral cortex that has been infected with the AAV-packaged library. Colocalization of RBFOX3 and GFP indicates expression of the library in neurons.
