# Supplementary material for: Massively parallel cis-regulatory analysis in the mammalian central nervous system
Source: PubMed Central journal article supplement — Genome Res. 2016 Feb;26(2):238–55. doi: 10.1101/gr.193789.115 (PMC4728376; doi:10.1101/gr.193789.115), 2016-02
Supplement: supp_gr.193789.115_Supp_Fig4.pdf [file supp_gr.193789.115_Supp_Fig4.pdf]

**A**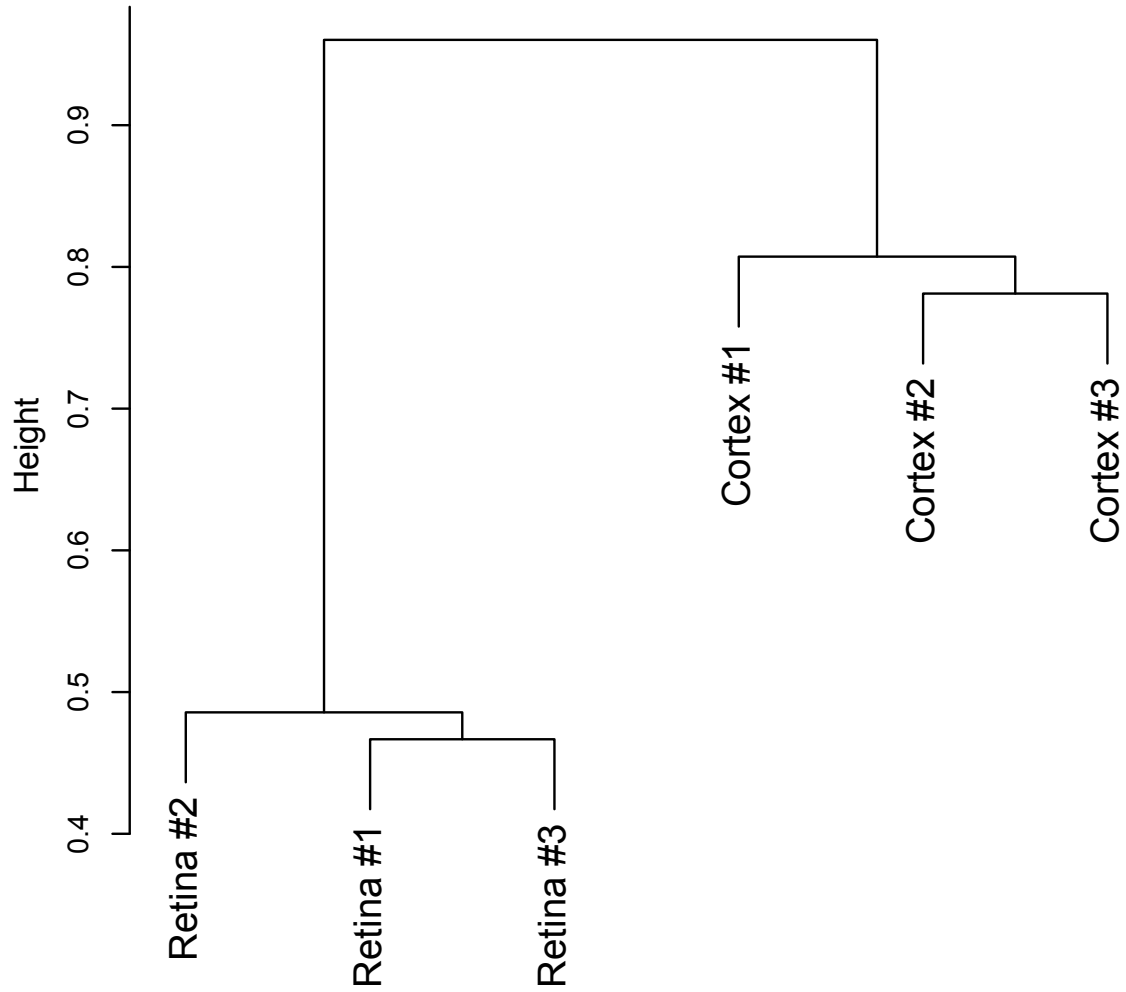**B**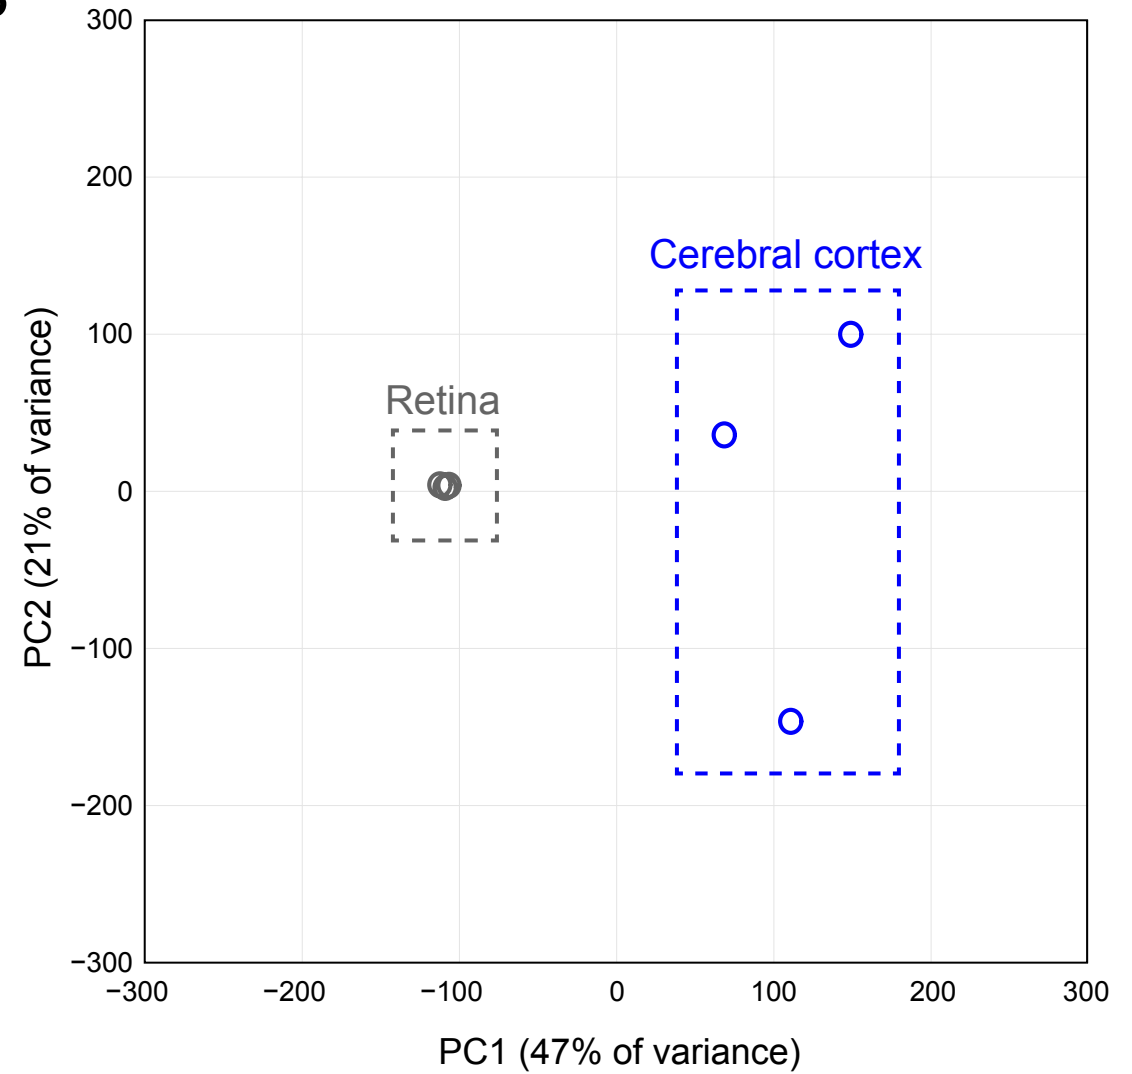

**Supplemental Figure S4. Comparison of biological replicates.** (A) Dendrogram showing distance between retinal and cerebral cortex biological replicates. (B) Principal components analysis (PCA) plot showing that PC1, which separates retina vs. cerebral cortex, accounts for the largest fraction of the variance.
