# Supplementary material for: Massively parallel cis-regulatory analysis in the mammalian central nervous system
Source: PubMed Central journal article supplement — Genome Res. 2016 Feb;26(2):238–55. doi: 10.1101/gr.193789.115 (PMC4728376; doi:10.1101/gr.193789.115), 2016-02
Supplement: supp_gr.193789.115_Supp_Fig7.pdf [file supp_gr.193789.115_Supp_Fig7.pdf]

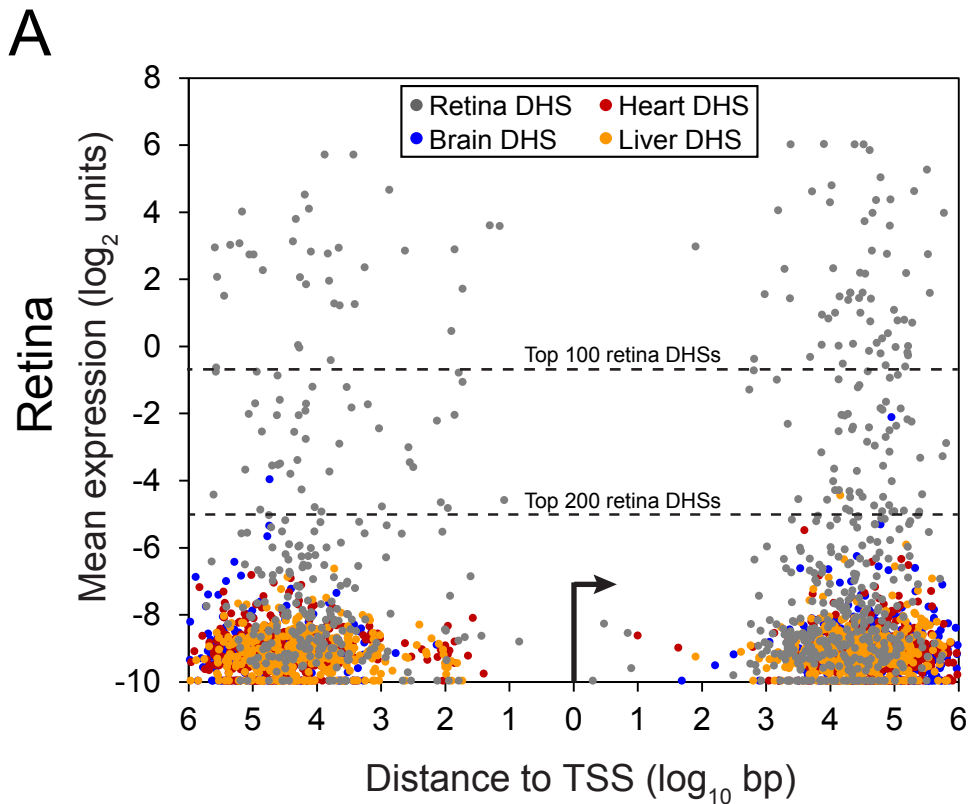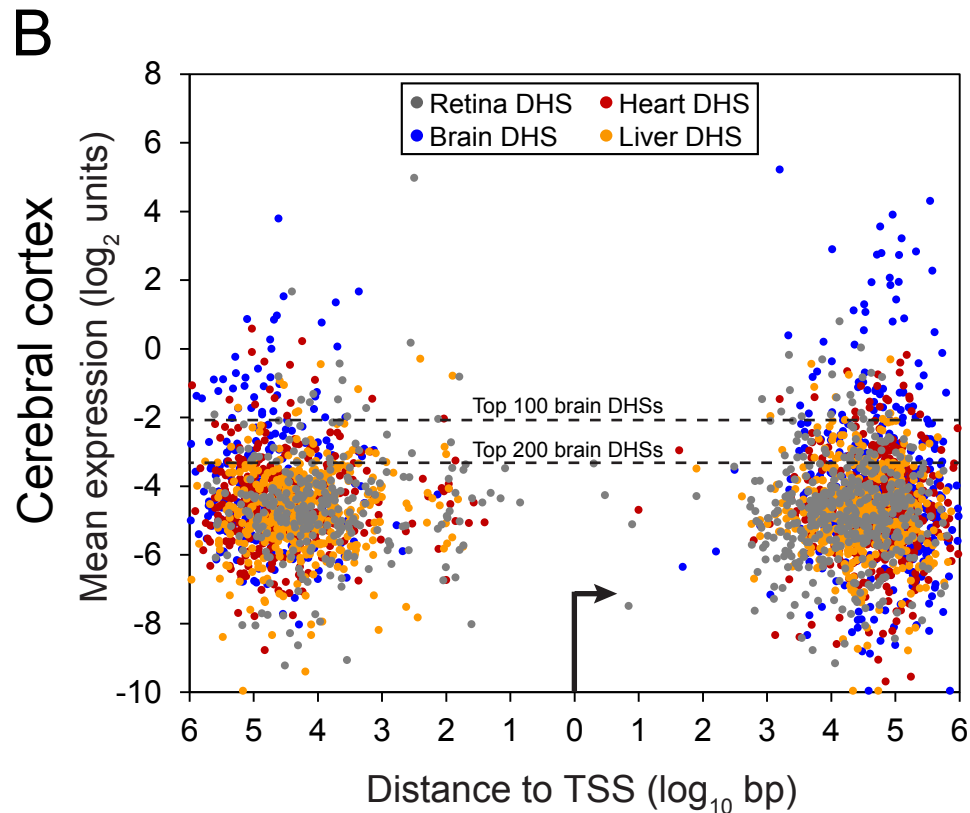

**Supplemental Figure S7. Distance to nearest TSS vs. expression.** Each dot in the scatterplot represents a DHS whose activity was assayed in (A) retina (~3,000 DHSs) or (B) cerebral cortex (~3,000 DHSs). Expression values were averaged across barcodes and biological replicates, and only DHSs with at least 2 well-represented barcoded constructs were included. Locations of target regions (up- or downstream) relative to the nearest TSS (indicated by arrow) are based on GREAT analysis (McLean et al. 2010). Gray, blue, red, and orange dots denote retina, brain, heart, and liver DHSs, respectively. Dotted lines denote the thresholds for the top 100 and top 200 most active retinal DHSs assayed in the retina, and the top 100 and top 200 most active brain DHSs assayed in the cerebral cortex.
