# Supplementary material for: Massively parallel cis-regulatory analysis in the mammalian central nervous system
Source: HighWire-hosted journal article supplement (doi:10.1101/gr.193789.115), 2015-11-17
Supplement: Supplemental_Information.docx [file Supplemental_Information.docx]

**SUPPLEMENTAL FIGURE LEGENDS**

**Supplemental Figure S1. Distribution of 4,000 target DHS regions.** (A) Histogram showing the locations of the target regions (up- or downstream) relative to the nearest transcriptional start site (TSS, indicated by arrow) based on GREAT analysis (McLean et al. 2010)**.** The number of ‘promoter-proximal’ DHSs for each group is shown, as defined by DHSs that fell within -1 kb to +100 bp relative to the nearest TSS. (B)Histogram showing the basic annotations for the target regions, based on HOMER (Heinz et al. 2010). Abbreviations: UTR, untranslated region; TTS, transcription termination site; ncRNA, non-coding RNA.

**Supplemental Figure S2. Distribution of overlap of captured fragments with target DHS regions.** Each target DHS was 300 bp. (A) Histogram showing the distribution of the overlap between targets and captured fragments for all 45,670 uniquely barcoded constructs. The median number of bases of overlap was 282 bp. (B) Histogram showing the distribution of the overall overlap between all 3,483 represented target regions and the captured fragments, based on the union of the captured fragments. Fragments collectively tiled at least 200 bp out of the 300 bp target for 3,402/3,483 (98%) target regions, and the entire 300 bp target for 3,146/3,483 (90%) target regions.

**Supplemental Figure S3. Co-expression of the library and cellular markers.** (A) Same retina as in Figure 3C, but a wider field and additional channels are shown. The library contains a GFP reporter. *Rho*-CBR3-DsRed is a rod-specific reporter (Corbo et al. 2010) that was coelectroporated with the library. Colocalization of DsRed and GFP indicates expression of the library in rods. Blue channel in merged image is DAPI, a nuclear counterstain. (B) Antibody staining of the neuronal marker RBFOX3 (also known as NeuN) (red channel) (Mullen et al. 1992) in a region of cerebral cortex that has been infected with the AAV-packaged library. Colocalization of RBFOX3 and GFP indicates expression of the library in neurons.

**Supplemental Figure S4. Comparison of biological replicates.** (A) Dendrogram showing distance between retinal and cerebral cortex biological replicates. (B) Principal components analysis (PCA) plot showing that PC1, which separates retina vs. cerebral cortex, accounts for the largest fraction of the variance.

**Supplemental Figure S5. CRE activity, DNase-seq signal, GC content, and phylogenetic conservation of assayed DHSs in a 1 kb centered window.** Retina, brain, heart, and liver DHSs were assayed in the retina (left) and cerebral cortex (right). Each panel shows a 1 kb centered window. Only DHSs with at least 2 barcodes were included in this analysis, i.e., in the retina, 710 retinal DHSs, 671 brain DHSs, 706 heart DHSs, and 829 liver DHSs, and in the cerebral cortex, 719 retinal DHSs, 696 brain DHSs, 724 heart DHSs, and 846 liver DHSs. (A) *Cis*-regulatory activity, as measured by mean expression in log2 units. For each assayed DHS, at each base position across the 1 kb window, the expression values of the individual barcoded constructs whose CREs overlapped the position were averaged across biological replicates. (B) DNase-seq score, normalized to the peak height. (C) GC content, calculated in 50 bp windows, sliding 25 bp at a time. The fractions denote the proportion of DHSs that were promoter-proximal (i.e., located within -1 kb to +100 bp relative to the nearest TSS) based on GREAT annotations (McLean et al. 2010). (D) Phylogenetic conservation as measured by 30-way vertebrate PhastCons (Siepel et al. 2005).

**Supplemental Figure S6. Length of CRE fragments vs. expression.** Each dot in the scatterplot represents an individual barcoded construct whose activity was assayed in (A) retina (~36,000 constructs) or (B) cerebral cortex (~39,000 constructs). Expression values were averaged across biological replicates. Pearson correlation values are shown.

**Supplemental Figure S7. Distance to nearest TSS vs. expression.** Each dot in the scatterplot represents a DHS whose activity was assayed in (A) retina (~3,000 DHSs) or (B) cerebral cortex (~3,000 DHSs). Expression values were averaged across barcodes and biological replicates, and only DHSs with at least 2 well-represented barcoded constructs were included. Locations of target regions (up- or downstream) relative to the nearest TSS (indicated by arrow) are based on GREAT analysis (McLean et al. 2010). Gray, blue, red, and orange dots denote retina, brain, heart, and liver DHSs, respectively. Dotted lines denote the thresholds for the top 100 and top 200 most active retinal DHSs assayed in the retina, and the top 100 and top 200 most active brain DHSs assayed in the cerebral cortex.

**Supplemental Figure S8. Additional examples of truncation mutation analysis by CRE-seq.** Additional examples of CRE-seq truncation mutation analysis for (A) retinal DHSs, based on retinal CRE-seq data, and (B) brain DHSs, based on cerebral cortex CRE-seq data. Individual barcoded constructs are colored by intensity (darker indicates higher expression; the heat map shown at bottom of panel A was used throughout). Critical regions are highlighted in pink. All browser images are from UCSC Genome Browser (mm9) (Karolchik et al. 2014). DNase-seq data are from Mouse ENCODE (Yue et al. 2014). PhastCons depict 30-way vertebrate phylogenetic conservation (Siepel et al. 2005).

**Supplemental Figure S9. Comparison between enhancer activity of short synthesized CREs and autonomous activity of corresponding captured CRE fragments in the retina.** The enhancer activity of short CREs (84 bp in length, synthesized on oligonucleotide arrays), representing the middle of CRX ChIP-seq peaks, was previously assayed in electroporated retinas by CRE-seq using a tissue-specific proximal promoter (White et al. 2013). The current study measured the autonomous activity of captured fragments using a minimal promoter. There were 176 regions (all retinal DHSs) assayed in both studies. (A) Scatterplot comparing the enhancer activity of short CREs (x-axis) with the autonomous activity of corresponding long CREs (y-axis). Each dot represents a DHS region (expression values were averaged across barcoded constructs and retinal replicates). Dots are color-coded based on whether expression was higher by four-fold or more in the current study (red dots) or lower by four-fold or more in the current study (blue dots). Note that R642 and R227 (yellow circles) are examples of constructs with higher activity in the current study. (B) R642 contains a phylogenetically conserved peak that contains a critical region, as identified by truncation mutation analysis in the current study. The short CRE that was tested in the enhancer assay excludes a portion of the phylogenetically conserved peak (purple) (White et al. 2013). The minus strand of DNA is shown. (C) R227 contains two phylogenetically conserved peaks, one of which is encompassed by the short CRE tested in the enhancer assay (White et al. 2013). The other peak (purple) contains a predicted CRX site. The CRX motif (from HOMER (Heinz et al. 2010)) is based on CRX ChIP-seq data (Corbo et al. 2010). Phylogenetic conservation is depicted by 30-way vertebrate PhastCons (Siepel et al. 2005). The heat map scales shown in (A) were consistent between the two studies and also used for (B) and (C).

**SUPPLEMENTAL TABLE LEGENDS**

**Supplemental Table S1. List of target DHS regions.** A total of4,000 tissue-specific DNase I hypersensitive (DHS) sites were selected based on Mouse ENCODE data from 8 week old whole brain, retina, heart, and liver (Yue et al. 2014). The central 300 bp of the peaks were used as the target regions for capture. The last column indicates the gene with the nearest transcriptional start site (TSS) based on GREAT analysis (McLean et al. 2010) and the distance in bp from the TSS, with negative or positive indicating that the region is upstream or downstream of the TSS, respectively. Genomic coordinates are in mm9.

**Supplemental Table S2. Motif enrichment within target DHS regions.** HOMER v4.7 (Heinz et al. 2010) was used to identify enrichment of known TF motifs among the 1,000 target regions (300 bp in size) each for retina, brain, heart, and liver DHS regions. Each worksheet lists the significant motif enrichments (5% false discovery rate) within the target regions for a given DHS tissue.

**Supplemental Table S3. Gene Ontology (GO) analysis of associated genes.** AmiGO (Carbon et al. 2009) was used to identify associations with GO terms (biological process) among the genes associated with the target regions (as found by GREAT analysis—see Supplemental Table S1). Each worksheet lists the top 20 associations with GO biological processes for the genes associated with the 1,000 target DHS regions for retina, brain, heart, or liver. The p-values were based on a binomial test with Bonferroni correction, as calculated in AmiGO.

**Supplemental Table S4. Correlation between replicates for RNA reads.** Pairwise Pearson correlation values (Pearson r) between biological replicates for raw RNA read counts were calculated for all individual barcoded constructs with at least 10 DNA reads in all three replicates for the tissue (~36,000 barcodes for retina and ~39,000 barcodes for cerebral cortex).

**Supplemental Table S5. De novo motif analysis and enrichment of TF motifs in low vs. high-expressing DHSs.** Based on *de novo* motif analysis with HOMER, 17 significant TF motifs were identified for retinal DNase-seq peaks and 13 significant TF motifs were identified for brain DNase-seq peaks. This yielded a collapsed list of 21 non-redundant TF motifs that were tested for enrichment in low vs. high-expressing DHSs as assayed in the retina or cerebral cortex. Note that ‘Tcf1’ is likely another CRX motif (not shown in Figure 5E), and the motif for NFY is shown in the opposite orientation compared to Figure 5E.

**Supplemental Table S6. Area under the curve (AUC) values for logistic regression models.** AUC values for each of the logistic regression models (see ROC curves in Figure 5F), including the AUC values for the five-fold cross validation (CV) tests.

**Supplemental Table S7. Predicted affinities of CRX sites within critical regions tested by traditional fluorescent reporter assays.** Critical regions tested by traditional fluorescent reporter assays contained CRX sites that were inactivated by point mutations (Fig. 7). The affinities of the wild type (WT) and mutant (MT) CRX sites, relative to the 8 bp consensus motif ‘CTAATCCC’, are based on previous quantitative CRX *in vitro* binding assays (Lee et al. 2010). Note that whereas Figure 7A shows the sequences of plus strand DNA, motif sequences below are for the minus or plus strand, depending on the orientation of the CRX site.

**Supplemental Table S8. Comparison of capture in the current study and CapSTARR-seq.** Compared to CapSTARR-seq (Vanhille et al. 2015), the current study used more stringent capture conditions and achieved a higher on-target rate. Moreover, the current study precisely mapped the ends of the captured fragments, permitting truncation mutation analysis.

**Supplemental Table S9. Sequences of oligos, primers, and adapters.**

**Supplemental Table S10. Custom UCSC Genome Browser tracks.** Each spreadsheet contains a custom track for the UCSC Genome Browser (Karolchik et al. 2014). The following tracks are included (mm9): bed track of the 4,000 target DHSs, bed track of the 45,670 on-target captured fragments, bed track of the 712 off-target captured fragments, bed tracks of the expression scores for each biological replicate, and bed tracks of the average signal for each tissue.

**SUPPLEMENTAL REFERENCES**

RetNet, <http://www.sph.uth.tmc.edu/RetNet/>.

Carbon S, Ireland A, Mungall CJ, Shu S, Marshall B, Lewis S, Ami GOH, Web Presence Working G. 2009. AmiGO: online access to ontology and annotation data. *Bioinformatics* **25**(2): 288-289.

Corbo JC, Lawrence KA, Karlstetter M, Myers CA, Abdelaziz M, Dirkes W, Weigelt K, Seifert M, Benes V, Fritsche LG et al. 2010. CRX ChIP-seq reveals the cis-regulatory architecture of mouse photoreceptors. *Genome research* **20**(11): 1512-1525.

Heinz S, Benner C, Spann N, Bertolino E, Lin YC, Laslo P, Cheng JX, Murre C, Singh H, Glass CK. 2010. Simple combinations of lineage-determining transcription factors prime cis-regulatory elements required for macrophage and B cell identities. *Molecular cell* **38**(4): 576-589.

Karolchik D, Barber GP, Casper J, Clawson H, Cline MS, Diekhans M, Dreszer TR, Fujita PA, Guruvadoo L, Haeussler M et al. 2014. The UCSC Genome Browser database: 2014 update. *Nucleic acids research* **42**(Database issue): D764-770.

Kwasnieski JC, Mogno I, Myers CA, Corbo JC, Cohen BA. 2012. Complex effects of nucleotide variants in a mammalian cis-regulatory element. *Proceedings of the National Academy of Sciences of the United States of America* **109**(47): 19498-19503.

Lee H, O'Connor BD, Merriman B, Funari VA, Homer N, Chen Z, Cohn DH, Nelson SF. 2009. Improving the efficiency of genomic loci capture using oligonucleotide arrays for high throughput resequencing. *BMC genomics* **10**: 646.

Lee J, Myers CA, Williams N, Abdelaziz M, Corbo JC. 2010. Quantitative fine-tuning of photoreceptor cis-regulatory elements through affinity modulation of transcription factor binding sites. *Gene therapy* **17**(11): 1390-1399.

Mamanova L, Coffey AJ, Scott CE, Kozarewa I, Turner EH, Kumar A, Howard E, Shendure J, Turner DJ. 2010. Target-enrichment strategies for next-generation sequencing. *Nature methods* **7**(2): 111-118.

McLean CY, Bristor D, Hiller M, Clarke SL, Schaar BT, Lowe CB, Wenger AM, Bejerano G. 2010. GREAT improves functional interpretation of cis-regulatory regions. *Nature biotechnology* **28**(5): 495-501.

Mullen RJ, Buck CR, Smith AM. 1992. NeuN, a neuronal specific nuclear protein in vertebrates. *Development* **116**(1): 201-211.

Siepel A, Bejerano G, Pedersen JS, Hinrichs AS, Hou M, Rosenbloom K, Clawson H, Spieth J, Hillier LW, Richards S et al. 2005. Evolutionarily conserved elements in vertebrate, insect, worm, and yeast genomes. *Genome research* **15**(8): 1034-1050.

Vanhille L, Griffon A, Maqbool MA, Zacarias-Cabeza J, Dao LT, Fernandez N, Ballester B, Andrau JC, Spicuglia S. 2015. High-throughput and quantitative assessment of enhancer activity in mammals by CapStarr-seq. *Nature communications* **6**: 6905.

White MA, Myers CA, Corbo JC, Cohen BA. 2013. Massively parallel in vivo enhancer assay reveals that highly local features determine the cis-regulatory function of ChIP-seq peaks. *Proceedings of the National Academy of Sciences of the United States of America* **110**(29): 11952-11957.

Yue F Cheng Y Breschi A Vierstra J Wu W Ryba T Sandstrom R Ma Z Davis C Pope BD et al. 2014. A comparative encyclopedia of DNA elements in the mouse genome. *Nature* **515**(7527): 355-364.
