# Supplementary material for: Massively parallel cis-regulatory analysis in the mammalian central nervous system
Source: HighWire-hosted journal article supplement (doi:10.1101/gr.193789.115), 2015-11-17
Supplement: SuppTable1_4000-DHS-regions_v2.xlsx [file SuppTable1_4000-DHS-regions_v2.xlsx]

## Sheet: 4000_target_DHS_regions
Target_name	Tissue_Origin	Chr	Start	End	Nearest gene (distance)
B1	Brain	chr18	74091565	74091865	Mro (+72674)
B2	Brain	chr14	123285145	123285445	A2ld1 (+27092)
B3	Brain	chr3	8561705	8562005	Stmn2 (+52328)
B4	Brain	chr3	136773465	136773765	Emcn (-230427)
B5	Brain	chr5	4486065	4486365	Fzd1 (+272001)
B6	Brain	chr19	23037245	23037545	Klf9 (-178321)
B7	Brain	chr10	116308385	116308685	Gm239 (+25400)
B8	Brain	chr9	53129445	53129745	Exph5 (+19820)
B9	Brain	chr15	79952125	79952425	Tab1 (-11309)
B10	Brain	chr16	37443005	37443305	Stxbp5l (-58111)
B11	Brain	chr2	129370765	129371065	F830045P16Rik (-8577)
B12	Brain	chr5	121539765	121540065	Rph3a (-80388)
B13	Brain	chr12	91664145	91664445	Dio2 (+312583)
B14	Brain	chr6	90749145	90749445	Iqsec1 (+10822)
B15	Brain	chr10	65644045	65644345	Reep3 (+915410)
B16	Brain	chr8	36996605	36996905	Cldn23 (-107142)
B17	Brain	chr7	70653045	70653345	Otud7a (+63537)
B18	Brain	chr5	114128785	114129085	Cmklr1 (-28536)
B19	Brain	chr8	116782645	116782945	Vat1l (+53255)
B20	Brain	chr5	34612085	34612385	Zfyve28 (+18738)
B21	Brain	chr7	90883985	90884285	Il16 (-135)
B22	Brain	chr1	154847685	154847985	Nmnat2 (+45604)
B23	Brain	chr12	26890955	26891255	Rnf144a (+209016)
B24	Brain	chr2	90664005	90664305	Mtch2 (-23157)
B25	Brain	chr15	72191105	72191405	Kcnk9 (+185454)
B26	Brain	chr4	75112985	75113285	3110001D03Rik (-188945)
B27	Brain	chr16	49980325	49980625	Cd47 (+124708)
B28	Brain	chr1	65595465	65595765	Pth2r (+237784)
B29	Brain	chr6	19232985	19233285	Ankrd7 (+416817)
B30	Brain	chr1	64388205	64388505	Creb1 (-191023)
B31	Brain	chr11	118744525	118744825	Rbfox3 (+26211)
B32	Brain	chr4	59838525	59838825	Snx30 (+20153)
B33	Brain	chr5	114178065	114178365	Ficd (-7576)
B34	Brain	chr8	66631025	66631325	Tll1 (+53615)
B35	Brain	chr14	16925745	16926045	Ngly1 (-155933)
B36	Brain	chr2	65528585	65528885	Scn2a1 (+20233)
B37	Brain	chr2	101747845	101748145	Commd9 (+21576)
B38	Brain	chr5	114173625	114173925	Ficd (-12016)
B39	Brain	chr10	4841445	4841745	Syne1 (+45746)
B40	Brain	chr5	39262925	39263225	Clnk (+4857)
B41	Brain	chr11	115870985	115871285	Galk1 (+2898)
B42	Brain	chr9	73775105	73775405	Unc13c (+6119)
B43	Brain	chr11	55155485	55155785	Fat2 (-29876)
B44	Brain	chr11	119384165	119384465	Nptx1 (+24819)
B45	Brain	chr8	89752725	89753025	Cbln1 (+243616)
B46	Brain	chr5	21992725	21993025	Orc5 (+63274)
B47	Brain	chr10	49857665	49857965	Grik2 (-349255)
B48	Brain	chr11	106684265	106684565	Ccdc45 (+33849)
B49	Brain	chr13	44493965	44494265	Jarid2 (-332157)
B50	Brain	chr9	29358205	29358505	Ntm (+412359)
B51	Brain	chr7	140478505	140478805	Ctbp2 (-271725)
B52	Brain	chr2	163790345	163790645	Ywhab (-30438)
B53	Brain	chr11	32491825	32492125	Fbxw11 (-50900)
B54	Brain	chr12	39559705	39560005	Etv1 (+53010)
B55	Brain	chr12	77906025	77906325	Gpx2 (-9634)
B56	Brain	chr16	9903145	9903445	Grin2a (+89331)
B57	Brain	chr19	21816685	21816985	Tmem2 (-35997)
B58	Brain	chr2	52032185	52032485	Rif1 (+103978)
B59	Brain	chr4	155065145	155065445	B930041F14Rik (-3286)
B60	Brain	chr5	89243585	89243885	Dck (+49697)
B61	Brain	chr2	137873585	137873885	Btbd3 (-230494)
B62	Brain	chr14	59557905	59558205	1700129C05Rik (+203675)
B63	Brain	chr11	42568445	42568745	Gabrb2 (+335336)
B64	Brain	chr4	66211885	66212185	Astn2 (-146518)
B65	Brain	chr7	70665225	70665525	Otud7a (+75717)
B66	Brain	chr11	42740705	42741005	Atp10b (-222524)
B67	Brain	chr12	78629125	78629425	Fut8 (+289267)
B68	Brain	chr2	32870445	32870745	Slc2a8 (-33019)
B69	Brain	chr6	19529405	19529705	Ankrd7 (+713237)
B70	Brain	chr2	139103325	139103625	Sptlc3 (-216181)
B71	Brain	chr5	128026865	128027165	Slc15a4 (+70747)
B72	Brain	chr18	68966365	68966665	Mc2r (-377602)
B73	Brain	chr1	196404505	196404805	Plxna2 (-41368)
B74	Brain	chr12	88381885	88382185	Tmem63c (+14521)
B75	Brain	chr5	30893605	30893905	Kcnk3 (+3212)
B76	Brain	chr10	4817885	4818185	Syne1 (+22186)
B77	Brain	chr9	108055885	108056185	Bsn (+36679)
B78	Brain	chr1	83502005	83502305	Sphkap (-97380)
B79	Brain	chr11	6020565	6020865	Camk2b (-54964)
B80	Brain	chr7	16734665	16734965	Slc8a2 (+19166)
B81	Brain	chr4	154638645	154638945	2610002J02Rik (+14720)
B82	Brain	chr13	110857345	110857645	Rab3c (+212919)
B83	Brain	chr14	28083045	28083345	Arhgef3 (+31970)
B84	Brain	chr4	154639045	154639345	2610002J02Rik (+15120)
B85	Brain	chr1	177361545	177361845	Rgs7 (+60981)
B86	Brain	chr15	102375305	102375605	Npff (-20403)
B87	Brain	chr11	100268685	100268985	Leprel4 (+7298)
B88	Brain	chr6	115119005	115119305	Syn2 (+34235)
B89	Brain	chr4	8940025	8940325	Clvs1 (-256289)
B90	Brain	chr10	57383605	57383905	Pkib (+31968)
B91	Brain	chr4	107493905	107494205	Lrp8 (+19191)
B92	Brain	chr9	29383525	29383825	Ntm (+387039)
B93	Brain	chr13	35333405	35333705	Peci (-247542)
B94	Brain	chr17	86665445	86665745	Prkce (+98470)
B95	Brain	chr3	137030905	137031205	Emcn (+27013)
B96	Brain	chr10	82139765	82140065	Glt8d2 (+13480)
B97	Brain	chr10	96291225	96291525	Btg1 (+211740)
B98	Brain	chr1	180384325	180384625	Efcab2 (+48463)
B99	Brain	chr11	106676305	106676605	Ccdc45 (+25889)
B100	Brain	chr9	44893865	44894165	Amica1 (+6749)
B101	Brain	chr4	53528825	53529125	Slc44a1 (+75690)
B102	Brain	chr4	147735085	147735385	Ptchd2 (-73161)
B103	Brain	chr2	57991125	57991425	Cytip (+21258)
B104	Brain	chr6	28481305	28481605	Snd1 (+51107)
B105	Brain	chr12	85792225	85792525	Aldh6a1 (-475)
B106	Brain	chr15	79993725	79994025	Mgat3 (-10276)
B107	Brain	chr3	136772825	136773125	Emcn (-231067)
B108	Brain	chr1	179538865	179539165	1700016C15Rik (-120930)
B109	Brain	chr8	15006585	15006885	Kbtbd11 (-4290)
B110	Brain	chr7	134942105	134942405	Hsd3b7 (-1868)
B111	Brain	chr14	49527085	49527385	Mudeng (-158935)
B112	Brain	chr19	6267305	6267605	Ehd1 (-9441)
B113	Brain	chr2	136568025	136568325	Snap25 (+28989)
B114	Brain	chr4	33988705	33989005	Cnr1 (-22752)
B115	Brain	chr9	64406005	64406305	Megf11 (+172722)
B116	Brain	chr13	102257625	102257925	Pik3r1 (+280397)
B117	Brain	chr17	27636045	27636345	Grm4 (+4283)
B118	Brain	chr11	6852865	6853165	Adcy1 (-110477)
B119	Brain	chr18	84119585	84119885	Tshz1 (+136219)
B120	Brain	chr4	67183345	67183645	Tlr4 (+694650)
B121	Brain	chr17	33643605	33643905	Adamts10 (-17386)
B122	Brain	chr6	124408565	124408865	Clstn3 (+6087)
B123	Brain	chr5	114133265	114133565	Cmklr1 (-33016)
B124	Brain	chr7	152521605	152521905	Mrgprd (+21015)
B125	Brain	chr1	160240625	160240925	Fam5b (+45616)
B126	Brain	chr7	119347445	119347745	Mical2 (-21755)
B127	Brain	chr10	3268665	3268965	Ipcef1 (-97261)
B128	Brain	chr10	127720705	127721005	Stat2 (+13223)
B129	Brain	chr4	8818725	8819025	Chd7 (+200807)
B130	Brain	chr1	48790465	48790765	C230029F24Rik (-510845)
B131	Brain	chr6	71475605	71475905	Vps24 (-18093)
B132	Brain	chr16	22797545	22797845	Crygs (+13788)
B133	Brain	chr15	39654645	39654945	Dpys (+34221)
B134	Brain	chr2	141646585	141646885	NONE
B135	Brain	chr5	115203425	115203725	Git2 (+19926)
B136	Brain	chr7	114543685	114543985	Syt9 (+29531)
B137	Brain	chr4	33977025	33977325	Cnr1 (-34432)
B138	Brain	chr15	23387225	23387525	Cdh18 (+421157)
B139	Brain	chr17	88170185	88170485	Kcnk12 (+26999)
B140	Brain	chr6	73336305	73336605	4931417E11Rik (+83206)
B141	Brain	chr1	133207025	133207325	Ikbke (-31035)
B142	Brain	chr1	94775905	94776205	Ankmy1 (+23428)
B143	Brain	chr6	91309705	91310005	Wnt7a (+51508)
B144	Brain	chr1	51300145	51300445	Sdpr (-45675)
B145	Brain	chr18	33128045	33128345	Camk4 (+29500)
B146	Brain	chr2	21265465	21265765	Gpr158 (-23579)
B147	Brain	chr15	99432225	99432525	Aqp6 (+544)
B148	Brain	chr4	58187485	58187785	Svep1 (+31833)
B149	Brain	chr2	167297145	167297445	Rnf114 (-20850)
B150	Brain	chr4	128565085	128565385	Trim62 (+3851)
B151	Brain	chr7	121171005	121171305	Rras2 (+90140)
B152	Brain	chr3	123676785	123677085	Ndst3 (-301540)
B153	Brain	chr18	57833425	57833725	1700011I03Rik (+140095)
B154	Brain	chr7	53799785	53800085	Sergef (+95242)
B155	Brain	chr10	114327805	114328105	Trhde (-89529)
B156	Brain	chr4	45768785	45769085	Aldh1b1 (-42959)
B157	Brain	chr7	16689105	16689405	Napa (+5263)
B158	Brain	chr18	39550645	39550945	Nr3c1 (+96104)
B159	Brain	chr17	66582125	66582425	Ddx11 (+109415)
B160	Brain	chr4	154526645	154526945	Morn1 (+66109)
B161	Brain	chr6	59278345	59278645	Gprin3 (+97789)
B162	Brain	chr9	41006585	41006885	Ubash3b (-41158)
B163	Brain	chr12	83488745	83489045	Sipa1l1 (+76559)
B164	Brain	chr10	98003745	98004045	Atp2b1 (-373891)
B165	Brain	chr2	65496525	65496825	AK143234 (-10107)
B166	Brain	chr18	73294625	73294925	Mex3c (-437584)
B167	Brain	chr7	146280705	146281005	Dpysl4 (+8955)
B168	Brain	chr17	30661405	30661705	Btbd9 (+51677)
B169	Brain	chr5	68541225	68541525	Grxcr1 (+118301)
B170	Brain	chr1	28271125	28271425	Gm597 (+565822)
B171	Brain	chr1	190889405	190889705	Kctd3 (-57836)
B172	Brain	chr10	89833525	89833825	Anks1b (+497421)
B173	Brain	chr8	86950525	86950825	Cacna1a (+11412)
B174	Brain	chr11	119719405	119719705	Chmp6 (-55569)
B175	Brain	chr5	134416765	134417065	Gatsl2 (-158703)
B176	Brain	chr19	22958845	22959145	Klf9 (-256721)
B177	Brain	chr3	139806925	139807225	B930007M17Rik (+938218)
B178	Brain	chr16	96471265	96471565	B3galt5 (-31224)
B179	Brain	chr9	29050645	29050945	Ntm (+719919)
B180	Brain	chr1	59433465	59433765	Fzd7 (-105376)
B181	Brain	chr12	81884985	81885285	4933426M11Rik (-6411)
B182	Brain	chr3	82210265	82210565	Mtap9 (+48421)
B183	Brain	chr3	114632565	114632865	Olfm3 (-151168)
B184	Brain	chr11	6789605	6789905	Adcy1 (-173737)
B185	Brain	chr5	131177685	131177985	A330070K13Rik (-317334)
B186	Brain	chr2	156700565	156700865	1110008F13Rik (+11857)
B187	Brain	chr11	32522205	32522505	Fbxw11 (-20520)
B188	Brain	chr12	90941425	90941725	Nrxn3 (+980255)
B189	Brain	chr7	57497285	57497585	Nell1 (+266715)
B190	Brain	chr8	89821305	89821605	Cbln1 (+175036)
B191	Brain	chr9	34709525	34709825	St3gal4 (+214720)
B192	Brain	chr14	16925325	16925625	Ngly1 (-156353)
B193	Brain	chr7	109518245	109518545	Rrm1 (-71814)
B194	Brain	chr12	110260545	110260845	Begain (+45732)
B195	Brain	chr13	105752905	105753205	Rgs7bp (+91955)
B196	Brain	chr17	88906765	88907065	Klraq1 (-22549)
B197	Brain	chr2	29786105	29786405	Gle1 (-4674)
B198	Brain	chr8	124223905	124224205	Jph3 (-30408)
B199	Brain	chr12	26876605	26876905	Rnf144a (+223366)
B200	Brain	chr8	128559005	128559305	Kcnk1 (+40153)
B201	Brain	chr11	84774345	84774645	Car4 (+3239)
B202	Brain	chr18	61469385	61469685	Pde6a (+89382)
B203	Brain	chr1	24668445	24668745	Lmbrd1 (-16788)
B204	Brain	chr2	170636885	170637185	Dok5 (+79728)
B205	Brain	chr5	74648945	74649245	Rasl11b (+57744)
B206	Brain	chr4	139045845	139046145	Iffo2 (-85056)
B207	Brain	chr6	24183705	24184005	Slc13a1 (-65763)
B208	Brain	chr6	88750765	88751065	Abtb1 (+41014)
B209	Brain	chr8	117015665	117015965	Wwox (+52263)
B210	Brain	chr1	153910965	153911265	1700025G04Rik (+26335)
B211	Brain	chr4	101779445	101779745	Gm12789 (+120150)
B212	Brain	chr1	178127225	178127525	Pld5 (+78068)
B213	Brain	chr11	114910885	114911185	Gm11711 (-11952)
B214	Brain	chr12	40043845	40044145	Etv1 (+537150)
B215	Brain	chr14	52680505	52680805	Olfr221 (-24871)
B216	Brain	chr7	30178365	30178665	Dpf1 (+89491)
B217	Brain	chr17	11350465	11350765	Park2 (+317365)
B218	Brain	chr8	128536285	128536585	Kcnk1 (+17433)
B219	Brain	chr3	99906665	99906965	Wdr3 (+59511)
B220	Brain	chr5	135654925	135655225	Baz1b (-8118)
B221	Brain	chr8	128483425	128483725	Kcnk1 (-35427)
B222	Brain	chr4	98301805	98302105	L1td1 (-91490)
B223	Brain	chr7	140084105	140084405	Fam175b (+33347)
B224	Brain	chr13	57907685	57907985	Spock1 (+101858)
B225	Brain	chr14	122017285	122017585	Dock9 (+80204)
B226	Brain	chr11	113517945	113518245	Cog1 (+7252)
B227	Brain	chr17	74180805	74181105	Ehd3 (+26774)
B228	Brain	chr7	99609125	99609425	Ccdc90b (-100384)
B229	Brain	chr9	112163245	112163545	Arpp21 (-74942)
B230	Brain	chr7	116183005	116183305	Tub (+28761)
B231	Brain	chr12	88301125	88301425	2310044G17Rik (+12982)
B232	Brain	chr8	116775185	116775485	Vat1l (+45795)
B233	Brain	chr2	156059405	156059705	Phf20 (+37172)
B234	Brain	chr9	34712765	34713065	St3gal4 (+211480)
B235	Brain	chr12	39775065	39775365	Etv1 (+268370)
B236	Brain	chr18	64935085	64935385	Nedd4l (-112175)
B237	Brain	chr9	62319645	62319945	Coro2b (+65056)
B238	Brain	chr1	134466185	134466485	Cntn2 (-26818)
B239	Brain	chr12	91380445	91380745	Dio2 (+596283)
B240	Brain	chr13	46430425	46430725	Gm1574 (+61485)
B241	Brain	chr13	58125465	58125765	Klhl3 (+78174)
B242	Brain	chr2	3519945	3520245	Cdnf (+89758)
B243	Brain	chr3	85197365	85197665	Pet112l (-180536)
B244	Brain	chr11	118752925	118753225	Rbfox3 (+17811)
B245	Brain	chr3	99910725	99911025	Wdr3 (+55451)
B246	Brain	chr5	27707565	27707865	Dpp6 (+119240)
B247	Brain	chr7	90899585	90899885	Il16 (-15735)
B248	Brain	chr1	17050665	17050965	Jph1 (+37064)
B249	Brain	chr7	74232685	74232985	Lysmd4 (-134595)
B250	Brain	chr3	114665285	114665585	Olfm3 (-118448)
B251	Brain	chr18	13865725	13866025	Zfp521 (+265367)
B252	Brain	chr16	9751145	9751445	Grin2a (+241331)
B253	Brain	chr2	71859905	71860205	Rapgef4 (+40783)
B254	Brain	chr3	109661245	109661545	Ntng1 (+284995)
B255	Brain	chr3	106975505	106975805	Kcna10 (-10406)
B256	Brain	chr9	91911385	91911685	Plscr1 (-233497)
B257	Brain	chr1	75569405	75569705	Slc4a3 (+26714)
B258	Brain	chr16	10005725	10006025	Grin2a (-13249)
B259	Brain	chr17	88820645	88820945	Foxn2 (-19257)
B260	Brain	chr10	13555925	13556225	Aig1 (+32561)
B261	Brain	chr3	105279365	105279665	Kcnd3 (+17858)
B262	Brain	chr6	103624365	103624665	Chl1 (+163645)
B263	Brain	chr10	126390125	126390425	Ctdsp2 (-25498)
B264	Brain	chr13	111994825	111995125	Actbl2 (-50246)
B265	Brain	chr5	110991725	110992025	Galnt9 (+18511)
B266	Brain	chr16	92975385	92975685	Runx1 (-149224)
B267	Brain	chr1	6810025	6810325	St18 (+90043)
B268	Brain	chr2	52068165	52068465	Neb (+126003)
B269	Brain	chr11	101049465	101049765	Cntnap1 (+12184)
B270	Brain	chr7	74633065	74633365	Mef2a (-115471)
B271	Brain	chr10	114351065	114351365	Trhde (-112789)
B272	Brain	chr12	83205245	83205545	Sipa1l1 (-206941)
B273	Brain	chr4	6352545	6352845	Nsmaf (+28723)
B274	Brain	chr4	128821825	128822125	Fndc5 (+7671)
B275	Brain	chr5	8095765	8096065	ADAM22 (+20744)
B276	Brain	chr1	179522525	179522825	1700016C15Rik (-137270)
B277	Brain	chr2	41838025	41838325	Lrp1b (+670943)
B278	Brain	chr6	126519885	126520185	Kcna5 (-34462)
B279	Brain	chr11	33236885	33237185	Tlx3 (-133447)
B280	Brain	chr19	24598005	24598305	Pip5k1b (+32162)
B281	Brain	chr15	40193805	40194105	Zfpm2 (-292633)
B282	Brain	chr1	190888525	190888825	Kctd3 (-56956)
B283	Brain	chr14	70938645	70938945	Reep4 (-6635)
B284	Brain	chr18	77473745	77474045	Loxhd1 (-46802)
B285	Brain	chr1	134434385	134434685	Cntn2 (+4982)
B286	Brain	chr13	118729365	118729665	Hcn1 (+338388)
B287	Brain	chr16	48372605	48372905	Morc1 (-58595)
B288	Brain	chr12	107258345	107258645	Vrk1 (+10022)
B289	Brain	chr10	41838725	41839025	Armc2 (-100687)
B290	Brain	chr2	79283025	79283325	Neurod1 (+13618)
B291	Brain	chr6	54029905	54030205	Chn2 (+40129)
B292	Brain	chr3	101611625	101611925	BC037703 (+28371)
B293	Brain	chr9	70513205	70513505	Fam63b (-8374)
B294	Brain	chr14	64792185	64792485	Prss52 (+69175)
B295	Brain	chr4	120563725	120564025	Rims3 (+13432)
B296	Brain	chr6	50606045	50606345	Npvf (-1803)
B297	Brain	chr6	71947225	71947525	Polr1a (+88328)
B298	Brain	chr2	25437505	25437805	Gm996 (-2036)
B299	Brain	chr8	56128345	56128645	Gpm6a (+88414)
B300	Brain	chr12	29826045	29826345	Myt1l (-387054)
B301	Brain	chr16	40228805	40229105	NONE
B302	Brain	chr17	88271705	88272005	Kcnk12 (-74521)
B303	Brain	chr2	77635365	77635665	Zfp385b (+19358)
B304	Brain	chr19	6549605	6549905	Slc22a12 (-6685)
B305	Brain	chr10	4877565	4877865	Syne1 (+81866)
B306	Brain	chr2	21012945	21013245	Enkur (+113897)
B307	Brain	chr2	90690605	90690905	Mtch2 (+3443)
B308	Brain	chr1	156708565	156708865	Cacna1e (-135665)
B309	Brain	chr18	44680125	44680425	Dcp2 (+140121)
B310	Brain	chr6	118703885	118704185	Ankrd26 (-191761)
B311	Brain	chr7	82474665	82474965	Sv2b (-20667)
B312	Brain	chr19	57324305	57324605	Ablim1 (-33933)
B313	Brain	chr4	134014845	134015145	Stmn1 (-9240)
B314	Brain	chr1	83273665	83273965	Wdr69 (+117478)
B315	Brain	chr4	154770885	154771185	Gabrd (+1143)
B316	Brain	chr7	53813345	53813645	Sergef (+81682)
B317	Brain	chr9	97957785	97958085	Clstn2 (-24349)
B318	Brain	chr15	71981085	71981385	Col22a1 (-116578)
B319	Brain	chr3	101494225	101494525	Atp1a1 (-85795)
B320	Brain	chr8	60441565	60441865	Galnt7 (-309863)
B321	Brain	chr17	64065525	64065825	Fert2 (-179692)
B322	Brain	chr2	138618845	138619145	Btbd3 (+514766)
B323	Brain	chr7	139870885	139871185	Lhpp (+68709)
B324	Brain	chr19	9186605	9186905	Asrgl1 (+23301)
B325	Brain	chr4	47992505	47992805	Nr4a3 (-71463)
B326	Brain	chr4	82879065	82879365	Ttc39b (+90878)
B327	Brain	chr9	30090725	30091025	Snx19 (-144039)
B328	Brain	chr12	113829085	113829385	Inf2 (+2240)
B329	Brain	chr15	80453925	80454225	Grap2 (+162)
B330	Brain	chr7	51881065	51881365	Kcnc3 (+34959)
B331	Brain	chr12	26556025	26556325	Rnf144a (+543946)
B332	Brain	chr17	78804725	78805025	Fez2 (+12568)
B333	Brain	chr18	64327005	64327305	St8sia3 (-86858)
B334	Brain	chr10	114456505	114456805	Tph2 (+165423)
B335	Brain	chr9	75275125	75275425	Leo1 (-14056)
B336	Brain	chr11	93351845	93352145	Car10 (+391391)
B337	Brain	chr16	95981145	95981445	Ets2 (+57281)
B338	Brain	chr2	155620885	155621185	Mmp24 (+19955)
B339	Brain	chr4	142446505	142446805	Prdm2 (+355957)
B340	Brain	chr8	128530345	128530645	Kcnk1 (+11493)
B341	Brain	chr11	55170345	55170645	Fat2 (-44736)
B342	Brain	chr4	9034425	9034725	Clvs1 (-161889)
B343	Brain	chr8	14748805	14749105	Cln8 (-139581)
B344	Brain	chr12	112480185	112480485	Amn (-28987)
B345	Brain	chr7	118731965	118732265	Galntl4 (+191376)
B346	Brain	chr16	17852005	17852305	Car15 (-13876)
B347	Brain	chr16	18124185	18124485	Rtn4r (-3464)
B348	Brain	chr5	53552765	53553065	Sel1l3 (+51776)
B349	Brain	chr6	53996385	53996685	Chn2 (+6609)
B350	Brain	chr10	116193305	116193605	Gm239 (+140480)
B351	Brain	chr4	98321105	98321405	L1td1 (-72190)
B352	Brain	chr6	144966865	144967165	Bcat1 (+30317)
B353	Brain	chr2	135664665	135664965	Plcb4 (+97249)
B354	Brain	chr14	58122585	58122885	Il17d (-20931)
B355	Brain	chr1	83244905	83245205	Wdr69 (+88718)
B356	Brain	chr2	119626685	119626985	Tyro3 (+1585)
B357	Brain	chr6	119028985	119029285	Dcp1b (-96136)
B358	Brain	chr8	125376165	125376465	Cdh15 (+4041)
B359	Brain	chr5	130876445	130876745	A330070K13Rik (-16094)
B360	Brain	chr9	113086265	113086565	Pdcd6ip (+530962)
B361	Brain	chr11	113659365	113659665	Cdc42ep4 (-47041)
B362	Brain	chr4	15523225	15523525	Calb1 (-285036)
B363	Brain	chr5	116976345	116976645	Srrm4 (+65331)
B364	Brain	chr7	109086145	109086445	Lrrc51 (-3924)
B365	Brain	chr13	19193885	19194185	Amph (+153795)
B366	Brain	chr15	42156805	42157105	Angpt1 (+351386)
B367	Brain	chr6	111689025	111689325	Lmcd1 (-534577)
B368	Brain	chr15	12145145	12145445	Mtmr12 (+10446)
B369	Brain	chr15	88934905	88935205	1300018J18Rik (+15518)
B370	Brain	chr4	81583365	81583665	Mpdz (-494806)
B371	Brain	chr6	24056245	24056545	Slc13a1 (+61697)
B372	Brain	chr11	18612825	18613125	Gm16140 (-296156)
B373	Brain	chr17	28960005	28960305	Brpf3 (+22084)
B374	Brain	chr2	17605325	17605625	Nebl (+47220)
B375	Brain	chr5	28564325	28564625	Cnpy1 (-62)
B376	Brain	chr8	14447345	14447645	Dlgap2 (+351620)
B377	Brain	chr8	37022305	37022605	Cldn23 (-132842)
B378	Brain	chr11	101892505	101892805	Mpp3 (-4386)
B379	Brain	chr16	20824425	20824725	Chrd (+91375)
B380	Brain	chr18	66320385	66320685	Ccbe1 (+130957)
B381	Brain	chr1	179503525	179503825	Zfp238 (+128883)
B382	Brain	chr8	70372585	70372885	Psd3 (+125738)
B383	Brain	chr9	91858945	91859245	Plscr1 (-285937)
B384	Brain	chr4	154466905	154467205	Morn1 (+6369)
B385	Brain	chr12	80053485	80053785	Tmem229b (+30830)
B386	Brain	chr18	30554005	30554305	Pik3c3 (+121605)
B387	Brain	chr2	32199585	32199885	Dnm1 (+9089)
B388	Brain	chr7	91193105	91193405	9930013L23Rik (+41760)
B389	Brain	chr7	103688165	103688465	AK053790 (-256836)
B390	Brain	chr2	58636025	58636325	Upp2 (+28579)
B391	Brain	chr7	72755105	72755405	Tarsl2 (-34529)
B392	Brain	chr8	37469825	37470125	6430573F11Rik (-82123)
B393	Brain	chr4	134550185	134550485	Syf2 (+63440)
B394	Brain	chr5	132349025	132349325	Auts2 (-398132)
B395	Brain	chr6	126149965	126150265	Ntf3 (-35137)
B396	Brain	chr7	112667905	112668205	Smpd1 (-34819)
B397	Brain	chr13	102177625	102177925	Pik3r1 (+360397)
B398	Brain	chr12	72532145	72532445	Dact1 (+121424)
B399	Brain	chr12	99545745	99546045	Gpr65 (+39028)
B400	Brain	chr13	54381385	54381685	Cplx2 (-91178)
B401	Brain	chr2	25289885	25290185	Abca2 (+5841)
B402	Brain	chr5	117613845	117614145	Taok3 (+43857)
B403	Brain	chr16	17642445	17642745	Ccdc74a (-3968)
B404	Brain	chr3	126901665	126901965	Ank2 (+210134)
B405	Brain	chr5	117013805	117014105	Srrm4 (+27871)
B406	Brain	chr7	82444125	82444425	Sv2b (+9873)
B407	Brain	chr8	107990545	107990845	Tppp3 (+4627)
B408	Brain	chr8	126312365	126312665	Rab4a (-17381)
B409	Brain	chr9	40862305	40862605	Crtam (-49786)
B410	Brain	chr2	59439065	59439365	Tanc1 (-10886)
B411	Brain	chr8	113483885	113484185	Ddx19a (+37688)
B412	Brain	chr9	61141025	61141325	Tle3 (-78998)
B413	Brain	chr16	76252105	76252405	Nrip1 (+121039)
B414	Brain	chr5	112797705	112798005	Gm6583 (-12802)
B415	Brain	chr5	117015645	117015945	Srrm4 (+26031)
B416	Brain	chr5	142615985	142616285	Foxk1 (-261316)
B417	Brain	chr3	121879645	121879945	Gclm (-68715)
B418	Brain	chr10	10430685	10430985	Rab32 (-152830)
B419	Brain	chr11	61282165	61282465	Rnf112 (-14927)
B420	Brain	chr12	81962965	81963265	4933426M11Rik (+71569)
B421	Brain	chr2	28268485	28268785	Gm347 (-34826)
B422	Brain	chr7	81062925	81063225	St8sia2 (+95493)
B423	Brain	chr9	101062485	101062785	Msl2 (+84184)
B424	Brain	chr18	79247785	79248085	Setbp1 (+58195)
B425	Brain	chr5	136962325	136962625	Cux1 (+79223)
B426	Brain	chr6	85466005	85466305	Egr4 (-2619)
B427	Brain	chr9	55193205	55193505	AI118078 (+18599)
B428	Brain	chr9	103481845	103482145	Bfsp2 (-99337)
B429	Brain	chr6	107394405	107394705	Lrrn1 (-85224)
B430	Brain	chr8	17465485	17465785	Csmd1 (+69750)
B431	Brain	chr12	70495505	70495805	Arf6 (+22518)
B432	Brain	chr19	53504885	53505185	Smndc1 (-39972)
B433	Brain	chr9	40139945	40140245	Scn3b (+63294)
B434	Brain	chr12	102105325	102105625	Gpr68 (+32259)
B435	Brain	chr2	29561145	29561445	Gm13547 (-55753)
B436	Brain	chr3	156748225	156748525	Zranb2 (-448986)
B437	Brain	chr9	101512685	101512985	Ppp2r3a (-358673)
B438	Brain	chr1	111829305	111829605	Cdh7 (-50765)
B439	Brain	chr2	30962165	30962465	Fnbp1 (+35213)
B440	Brain	chr6	117963585	117963885	Rasgef1a (-52668)
B441	Brain	chr7	140660005	140660305	4930404H21Rik (+133643)
B442	Brain	chr10	84426545	84426845	Ric8b (+46334)
B443	Brain	chr4	154673005	154673305	2610002J02Rik (+49080)
B444	Brain	chr12	41190985	41191285	Dock4 (+18495)
B445	Brain	chr13	46955285	46955585	Kif13a (+69652)
B446	Brain	chr16	95286025	95286325	Kcnj6 (-66872)
B447	Brain	chr2	124466925	124467225	Sema6d (+31043)
B448	Brain	chr4	33880445	33880745	Cnr1 (-131012)
B449	Brain	chr9	94173745	94174045	1190002N15Rik (+264605)
B450	Brain	chr12	40068485	40068785	Etv1 (+561790)
B451	Brain	chr4	87842045	87842345	BC057079 (+101661)
B452	Brain	chr1	89382985	89383285	3110079O15Rik (+16296)
B453	Brain	chr11	17663465	17663765	Etaa1 (+190263)
B454	Brain	chr15	86594125	86594425	Tbc1d22a (+549386)
B455	Brain	chr6	17607365	17607665	Capza2 (+20417)
B456	Brain	chr7	99464905	99465205	Ccdc90b (-244604)
B457	Brain	chr10	83083165	83083465	Appl2 (+28094)
B458	Brain	chr11	35117725	35118025	Slit3 (+182917)
B459	Brain	chr5	89484745	89485045	Slc4a4 (+168610)
B460	Brain	chr6	126312405	126312705	Kcna5 (+173018)
B461	Brain	chr15	23496685	23496985	Cdh18 (+530617)
B462	Brain	chr7	107095845	107096145	Rnf169 (+32973)
B463	Brain	chr10	89374685	89374985	Anks1b (+38581)
B464	Brain	chr14	124935385	124935685	Fgf14 (-343767)
B465	Brain	chr18	64911085	64911385	Atp8b1 (-90581)
B466	Brain	chr8	36987145	36987445	Cldn23 (-97682)
B467	Brain	chr1	136193885	136194185	Myog (+7454)
B468	Brain	chr5	26890625	26890925	Gm10220 (-442810)
B469	Brain	chr5	37284565	37284865	Ppp2r2c (+24906)
B470	Brain	chr10	37627585	37627885	Marcks (-769003)
B471	Brain	chr11	93078825	93079125	Car10 (+118371)
B472	Brain	chr16	24194105	24194405	Bcl6 (-205557)
B473	Brain	chr4	128758345	128758645	Rnf19b (+22980)
B474	Brain	chr10	125958065	125958365	Xrcc6bp1 (+380212)
B475	Brain	chr15	88435105	88435405	Zdhhc25 (+4523)
B476	Brain	chr18	77465305	77465605	St8sia5 (+40869)
B477	Brain	chr2	85053945	85054245	Lrrc55 (-17239)
B478	Brain	chr15	83867545	83867845	Efcab6 (+28084)
B479	Brain	chr5	64414245	64414545	Rell1 (-54259)
B480	Brain	chr6	87832865	87833165	Copg (-4919)
B481	Brain	chr14	12505545	12505845	Ptprg (+119628)
B482	Brain	chr4	90905785	90906085	Elavl2 (+132811)
B483	Brain	chr4	142466105	142466405	Prdm2 (+336357)
B484	Brain	chr9	62036185	62036485	Spesp1 (+93651)
B485	Brain	chr1	107360445	107360745	Rnf152 (-107308)
B486	Brain	chr6	112748405	112748705	Rad18 (-101891)
B487	Brain	chr10	109003765	109004065	Nav3 (+433360)
B488	Brain	chr9	97586145	97586445	Trim42 (-315918)
B489	Brain	chr12	39764725	39765025	Etv1 (+258030)
B490	Brain	chr2	101302665	101302965	Rag2 (-162090)
B491	Brain	chr3	55293565	55293865	Dclk1 (+247267)
B492	Brain	chr3	120649905	120650205	Rwdd3 (+224558)
B493	Brain	chr5	14750905	14751205	Gm9758 (+163834)
B494	Brain	chr11	76623025	76623325	Cpd (+37335)
B495	Brain	chr13	43801845	43802145	Cd83 (-78481)
B496	Brain	chr13	109624405	109624705	Pde4d (+180256)
B497	Brain	chr16	28402805	28403105	Fgf12 (+42358)
B498	Brain	chr18	33922705	33923005	Epb4.1l4a (+244005)
B499	Brain	chr12	82417065	82417365	Slc8a3 (+16952)
B500	Brain	chr6	54406865	54407165	Wipf3 (+4138)
B501	Brain	chr1	195611165	195611465	Camk1g (-414839)
B502	Brain	chr2	143043845	143044145	Otor (+139767)
B503	Brain	chr3	114731585	114731885	Olfm3 (-52148)
B504	Brain	chr6	44247465	44247765	Tpk1 (-631441)
B505	Brain	chr1	83491645	83491945	Sphkap (-87020)
B506	Brain	chr1	106898785	106899085	Cdh20 (+233539)
B507	Brain	chr12	83173805	83174105	Pcnx (+212938)
B508	Brain	chr2	179497285	179497585	Taf4a (+213916)
B509	Brain	chr7	137859025	137859325	Btbd16 (-58408)
B510	Brain	chr9	28425345	28425645	NONE
B511	Brain	chr9	75154365	75154665	Gnb5 (-4671)
B512	Brain	chrX	7782745	7783045	Porcn (+756)
B513	Brain	chr3	138528305	138528605	Tspan5 (+123296)
B514	Brain	chr9	96727845	96728145	Acpl2 (+61846)
B515	Brain	chr13	21125105	21125405	Olfr1370 (+39913)
B516	Brain	chr14	26189785	26190085	Zmiz1 (-88843)
B517	Brain	chr8	97297525	97297825	Cx3cl1 (+1595)
B518	Brain	chr11	45268485	45268785	Clint1 (-396831)
B519	Brain	chr11	114729645	114729945	Gprc5c (+16941)
B520	Brain	chr15	53579965	53580265	Samd12 (+153876)
B521	Brain	chr11	97327805	97328105	Arhgap23 (+16481)
B522	Brain	chr11	114037125	114037425	Sdk2 (-110010)
B523	Brain	chr13	64461085	64461385	Ctsl (+10379)
B524	Brain	chr5	114041745	114042045	Cmklr1 (+58504)
B525	Brain	chr6	137557065	137557365	Eps8 (+40426)
B526	Brain	chrX	154813765	154814065	Cnksr2 (-332873)
B527	Brain	chr11	43331225	43331525	Ccnjl (-10911)
B528	Brain	chr15	63878865	63879165	Fam49b (+12995)
B529	Brain	chr15	71537445	71537745	Fam135b (+20673)
B530	Brain	chr17	49340825	49341125	Mocs1 (-226714)
B531	Brain	chr6	112838105	112838405	Srgap3 (+59005)
B532	Brain	chr8	26532005	26532305	Fgfr1 (-97089)
B533	Brain	chr1	48590245	48590545	C230029F24Rik (-711065)
B534	Brain	chr10	40567345	40567645	Cdc40 (+35454)
B535	Brain	chr16	35577685	35577985	Sema5b (+36387)
B536	Brain	chr2	52331425	52331725	Arl5a (-51181)
B537	Brain	chr5	93664945	93665245	Ccni (-29574)
B538	Brain	chr6	82867125	82867425	Sema4f (+22469)
B539	Brain	chr11	32417385	32417685	Efcab9 (+10039)
B540	Brain	chr17	70713005	70713305	Dlgap1 (-60981)
B541	Brain	chr17	91312705	91313005	Nrxn1 (+179287)
B542	Brain	chr18	13557745	13558045	Hrh4 (+392396)
B543	Brain	chr2	17460165	17460465	Nebl (-75899)
B544	Brain	chr6	56286045	56286345	Pde1c (+26191)
B545	Brain	chr7	58477225	58477525	Ano5 (-289024)
B546	Brain	chr11	67477805	67478105	Rcvrn (-30873)
B547	Brain	chr7	152505325	152505625	Mrgprd (+4735)
B548	Brain	chr1	133248125	133248425	Ikbke (-72135)
B549	Brain	chr11	92970805	92971105	Car10 (+10351)
B550	Brain	chr2	52417965	52418265	Cacnb4 (+113986)
B551	Brain	chr2	94320145	94320445	Api5 (-41991)
B552	Brain	chr9	120976205	120976505	Ctnnb1 (+133837)
B553	Brain	chr12	81899325	81899625	4933426M11Rik (+7929)
B554	Brain	chr3	25107245	25107545	Nlgn1 (+944834)
B555	Brain	chr4	8803665	8803965	Chd7 (+185747)
B556	Brain	chr7	125922145	125922445	9030624J02Rik (+38510)
B557	Brain	chr18	39038205	39038505	Gm5820 (-13755)
B558	Brain	chr8	53656585	53656885	Aga (-940345)
B559	Brain	chr8	107833425	107833725	Elmo3 (+4074)
B560	Brain	chr11	101885805	101886105	Mpp3 (+2314)
B561	Brain	chr18	61998985	61999285	Afap1l1 (-52819)
B562	Brain	chr2	92993065	92993365	Trp53i11 (-34526)
B563	Brain	chr7	99412945	99413245	Ccdc90b (-296564)
B564	Brain	chr12	33442325	33442625	Nampt (-62725)
B565	Brain	chr12	45655825	45656125	Nrcam (+226103)
B566	Brain	chr13	100324445	100324745	Mtap1b (-38038)
B567	Brain	chr16	24460185	24460485	Lpp (+12158)
B568	Brain	chr17	88197285	88197585	Kcnk12 (-101)
B569	Brain	chr4	25550365	25550665	Fut9 (+176635)
B570	Brain	chr2	57759405	57759705	Galnt5 (-91011)
B571	Brain	chr9	86868465	86868765	Ripply2 (-41757)
B572	Brain	chr1	129438185	129438485	Tmem163 (+136263)
B573	Brain	chr12	35756065	35756365	Snx13 (+24354)
B574	Brain	chr2	3657025	3657325	Fam107b (+26445)
B575	Brain	chr9	31138845	31139145	Prdm10 (+16303)
B576	Brain	chr1	175289745	175290045	Cadm3 (+7931)
B577	Brain	chr16	48332005	48332305	Dppa2 (+21768)
B578	Brain	chr18	37978925	37979225	Diap1 (+115990)
B579	Brain	chr2	157882845	157883145	Rprd1b (+28465)
B580	Brain	chr5	112913945	112914245	Gm6588 (+35649)
B581	Brain	chr7	71137045	71137345	Klf13 (-53394)
B582	Brain	chr8	12893845	12894145	Mcf2l (-21898)
B583	Brain	chr9	91693365	91693665	Zic4 (+429705)
B584	Brain	chr15	73751925	73752225	Gm628 (-81974)
B585	Brain	chr19	22878865	22879165	Klf9 (-336701)
B586	Brain	chr5	53533865	53534165	Sel1l3 (+70676)
B587	Brain	chr10	90229065	90229365	Apaf1 (+316273)
B588	Brain	chr11	67483625	67483925	Rcvrn (-25053)
B589	Brain	chr11	93557805	93558105	Utp18 (+189125)
B590	Brain	chr15	37656565	37656865	Ncald (+65040)
B591	Brain	chr6	28751025	28751325	Lrrc4 (+30572)
B592	Brain	chr17	6118885	6119185	Tulp4 (-19113)
B593	Brain	chr18	62060545	62060845	Ablim3 (+10811)
B594	Brain	chr2	138414865	138415165	Btbd3 (+310786)
B595	Brain	chr5	39849325	39849625	Hs3st1 (+186395)
B596	Brain	chr7	85527105	85527405	Ntrk3 (+195469)
B597	Brain	chr11	71752665	71752965	Aipl1 (+98196)
B598	Brain	chr16	16931045	16931345	Ppm1f (+34633)
B599	Brain	chr15	52244765	52245065	Slc30a8 (+117807)
B600	Brain	chr5	68440125	68440425	Grxcr1 (+17201)
B601	Brain	chr6	81421605	81421905	AW146020 (-451908)
B602	Brain	chr1	59272345	59272645	Als2 (+21580)
B603	Brain	chr10	93096385	93096685	Ntn4 (-7259)
B604	Brain	chr2	136127185	136127485	Pak7 (+86368)
B605	Brain	chr4	99379325	99379625	Alg6 (-2846)
B606	Brain	chr7	147086845	147087145	Kndc1 (+6400)
B607	Brain	chr13	43725225	43725525	Rnf182 (+14209)
B608	Brain	chr16	51910205	51910505	Cblb (-121307)
B609	Brain	chr19	43540445	43540745	Cnnm1 (+25669)
B610	Brain	chr2	90810785	90811085	Celf1 (+30320)
B611	Brain	chr3	85202405	85202705	Pet112l (-175496)
B612	Brain	chr6	52837485	52837785	Tax1bp1 (+173912)
B613	Brain	chr6	107012885	107013185	Crbn (-262967)
B614	Brain	chr8	11770065	11770365	Arhgef7 (+42110)
B615	Brain	chr8	124255365	124255665	Jph3 (+1052)
B616	Brain	chr13	98320185	98320485	Enc1 (+309275)
B617	Brain	chr7	129483085	129483385	Prkcb (+50596)
B618	Brain	chr8	75028125	75028425	Slc35e1 (-11762)
B619	Brain	chr8	89050745	89051045	Abcc12 (+39611)
B620	Brain	chr12	44928305	44928605	Dnajb9 (+382600)
B621	Brain	chr15	80158225	80158525	Cacna1i (+40707)
B622	Brain	chr4	13175605	13175905	Gm11818 (+341771)
B623	Brain	chr12	11405685	11405985	Vsnl1 (+37620)
B624	Brain	chr18	33725965	33726265	D0H4S114 (-102432)
B625	Brain	chr8	45776005	45776305	Fat1 (-259407)
B626	Brain	chr11	55150085	55150385	Fat2 (-24476)
B627	Brain	chr2	91332445	91332745	Lrp4 (+34907)
B628	Brain	chr8	37582785	37583085	6430573F11Rik (+30837)
B629	Brain	chr8	112685945	112686245	Calb2 (+6011)
B630	Brain	chr15	85233905	85234205	Atxn10 (+67244)
B631	Brain	chr17	8747125	8747425	T (+119987)
B632	Brain	chr18	46058065	46058365	1700018A14Rik (-300460)
B633	Brain	chr9	89745405	89745705	Rasgrf1 (-59058)
B634	Brain	chr9	108039445	108039745	Apeh (-42784)
B635	Brain	chr1	136170985	136171285	Myog (-15446)
B636	Brain	chr1	137501325	137501625	Nav1 (-19543)
B637	Brain	chr10	24841025	24841325	Akap7 (+177794)
B638	Brain	chr13	109966105	109966405	Pde4d (+521956)
B639	Brain	chr15	4448085	4448385	Plcxd3 (+122744)
B640	Brain	chr16	9909345	9909645	Grin2a (+83131)
B641	Brain	chr19	53528645	53528945	Smndc1 (-63732)
B642	Brain	chr10	115799305	115799605	Ptprb (+61025)
B643	Brain	chr12	92199845	92200145	Dio2 (-223117)
B644	Brain	chr13	59039905	59040205	Ntrk2 (+130861)
B645	Brain	chr5	112750025	112750325	Tfip11 (-5214)
B646	Brain	chr6	107949305	107949605	Setmar (-65585)
B647	Brain	chr7	20185905	20186205	Clasrp (+3762)
B648	Brain	chr7	85534965	85535265	Ntrk3 (+187609)
B649	Brain	chr1	17050105	17050405	Jph1 (+37624)
B650	Brain	chr8	107990925	107991225	Tppp3 (+4247)
B651	Brain	chr8	116409085	116409385	Adamts18 (-36496)
B652	Brain	chr1	177897185	177897485	B020018G12Rik (+11912)
B653	Brain	chr15	94874505	94874805	Tmem117 (+415039)
B654	Brain	chr16	24390745	24391045	Lpp (-57282)
B655	Brain	chr6	106390845	106391145	Il5ra (+308036)
B656	Brain	chr7	56034525	56034825	Zdhhc13 (-9698)
B657	Brain	chr1	73012945	73013245	Tnp1 (+49378)
B658	Brain	chr15	72499365	72499665	Kcnk9 (-122806)
B659	Brain	chr18	56964565	56964865	Lmnb1 (+97248)
B660	Brain	chr7	31907705	31908005	Scn1b (+4109)
B661	Brain	chr11	114345165	114345465	Rpl38 (-184542)
B662	Brain	chr15	91444485	91444785	Slc2a13 (-40943)
B663	Brain	chr2	165152405	165152705	Elmo2 (-576)
B664	Brain	chr4	154620805	154621105	2610002J02Rik (-3120)
B665	Brain	chr7	140801325	140801625	4930404H21Rik (-7677)
B666	Brain	chr12	71505365	71505665	Tmx1 (-48626)
B667	Brain	chr16	41941745	41942045	Gap43 (+398869)
B668	Brain	chr1	72447225	72447525	Xrcc5 (+93380)
B669	Brain	chr1	107360845	107361145	Rnf152 (-107708)
B670	Brain	chr11	42568985	42569285	Gabrb2 (+335876)
B671	Brain	chr12	106177585	106177885	4831426I19Rik (+59152)
B672	Brain	chr14	25893925	25894225	Zmiz1 (-384703)
B673	Brain	chr14	52631805	52632105	G630016D24Rik (-4585)
B674	Brain	chr18	33321985	33322285	Stard4 (+51335)
B675	Brain	chr19	58370525	58370825	Gfra1 (+158409)
B676	Brain	chr4	65335705	65336005	Trim32 (+69835)
B677	Brain	chr6	56510565	56510865	Lsm5 (+143978)
B678	Brain	chr1	194211585	194211885	Kcnh1 (+196981)
B679	Brain	chr11	36379705	36380005	Odz2 (+377890)
B680	Brain	chr12	8441165	8441465	Rhob (+65476)
B681	Brain	chr4	47621645	47621945	Sec61b (+134262)
B682	Brain	chr9	117979605	117979905	Azi2 (+30138)
B683	Brain	chr11	93016265	93016565	Car10 (+55811)
B684	Brain	chr13	52608965	52609265	Diras2 (+17090)
B685	Brain	chr13	100220765	100221065	Mtap1b (+65642)
B686	Brain	chr15	45285405	45285705	Kcnv1 (-339075)
B687	Brain	chr17	50139985	50140285	Rftn1 (+189687)
B688	Brain	chr5	101724985	101725285	Nkx6-1 (+368595)
B689	Brain	chr5	132248565	132248865	Auts2 (-297672)
B690	Brain	chr1	180994725	180995025	Smyd3 (+453259)
B691	Brain	chr18	51318385	51318685	Prr16 (+40983)
B692	Brain	chr4	43992685	43992985	Ccin (-3541)
B693	Brain	chr5	37638765	37639065	Crmp1 (+5596)
B694	Brain	chr6	118674965	118675265	Ankrd26 (-162841)
B695	Brain	chr9	78852485	78852785	Cd109 (+389282)
B696	Brain	chr4	90901665	90901965	Elavl2 (+136931)
B697	Brain	chr15	98639325	98639625	Ddn (-1119)
B698	Brain	chr18	26339145	26339445	Celf4 (-426811)
B699	Brain	chr19	22957245	22957545	Klf9 (-258321)
B700	Brain	chr12	103453305	103453605	Rin3 (-67829)
B701	Brain	chr15	80108865	80109165	Cacna1i (-8653)
B702	Brain	chr10	66487165	66487465	Reep3 (+72290)
B703	Brain	chr13	43995525	43995825	Cd83 (+115199)
B704	Brain	chr13	111417905	111418205	Plk2 (+232803)
B705	Brain	chr14	55737685	55737985	Jph4 (-2720)
B706	Brain	chr7	70701305	70701605	Otud7a (+111797)
B707	Brain	chr7	133176365	133176665	Gsg1l (+49410)
B708	Brain	chr7	149747785	149748085	Mrpl23 (+28913)
B709	Brain	chr9	13402165	13402465	Maml2 (-22118)
B710	Brain	chr1	59623785	59624085	Gm973 (+50827)
B711	Brain	chr6	115035665	115035965	1500001M20Rik (-47923)
B712	Brain	chr17	11578105	11578405	Park2 (+545005)
B713	Brain	chr2	153789125	153789425	Gm5840 (-11406)
B714	Brain	chr3	139549525	139549825	B930007M17Rik (+680818)
B715	Brain	chr4	84986645	84986945	Sh3gl2 (+135435)
B716	Brain	chr4	127895465	127895765	Hmgb4 (+42524)
B717	Brain	chr8	113229325	113229625	Mtss1l (-15909)
B718	Brain	chr16	67125145	67125445	Cadm2 (+495858)
B719	Brain	chr8	41700805	41701105	Mtmr7 (+19191)
B720	Brain	chr1	134425265	134425565	Cntn2 (+14102)
B721	Brain	chr11	42281925	42282225	Gabrb2 (+48816)
B722	Brain	chr5	106480085	106480385	Zfp326 (+174648)
B723	Brain	chr5	108798325	108798625	AK031816 (+1665)
B724	Brain	chr5	125364325	125364625	Zfp664 (+21400)
B725	Brain	chr14	77656765	77657065	Enox1 (+100292)
B726	Brain	chr16	45768405	45768705	Abhd10 (-25536)
B727	Brain	chr5	102325845	102326145	Cds1 (+131846)
B728	Brain	chr5	131347025	131347325	Wbscr17 (+436217)
B729	Brain	chr9	28491665	28491965	NONE
B730	Brain	chr1	137277305	137277605	Shisa4 (-5815)
B731	Brain	chr11	60843445	60843745	Kcnj12 (-35711)
B732	Brain	chr12	87297205	87297505	Tgfb3 (+122636)
B733	Brain	chr18	68163185	68163485	D18Ertd653e (+70424)
B734	Brain	chr4	130676625	130676925	Matn1 (+176475)
B735	Brain	chr5	50033765	50034065	Gpr125 (+416320)
B736	Brain	chr5	140424585	140424885	Elfn1 (+40838)
B737	Brain	chr6	18589725	18590025	Cttnbp2 (-125050)
B738	Brain	chr1	175294605	175294905	Cadm3 (+3071)
B739	Brain	chr17	8745245	8745545	T (+118107)
B740	Brain	chr18	23505645	23505945	Dtna (-68121)
B741	Brain	chr18	25673545	25673845	Celf4 (+238789)
B742	Brain	chr3	89563785	89564085	Chrnb2 (+4619)
B743	Brain	chr4	64464985	64465285	Pappa (-320073)
B744	Brain	chr9	103451625	103451925	Bfsp2 (-69117)
B745	Brain	chr10	97065925	97066225	Kera (-3764)
B746	Brain	chr11	35150105	35150405	Slit3 (+215297)
B747	Brain	chr12	109593525	109593825	Cyp46a1 (+21084)
B748	Brain	chr6	90752585	90752885	Iqsec1 (+7382)
B749	Brain	chr9	28376565	28376865	NONE
B750	Brain	chr1	156886085	156886385	Mr1 (+107675)
B751	Brain	chr11	46048805	46049105	C030019I05Rik (-104)
B752	Brain	chr15	79640505	79640805	Npcd (+24108)
B753	Brain	chr19	22827725	22828025	Klf9 (-387841)
B754	Brain	chr2	91790945	91791245	Dgkz (-590)
B755	Brain	chr6	119759205	119759505	Erc1 (+38813)
B756	Brain	chr12	114251165	114251465	Pacs2 (-1404)
B757	Brain	chr16	90023905	90024205	Tiam1 (-49111)
B758	Brain	chr19	10880465	10880765	Cd6 (+23933)
B759	Brain	chr2	163739945	163740245	Rims4 (+4324)
B760	Brain	chr5	125317005	125317305	Ccdc92 (+25436)
B761	Brain	chr7	121433525	121433825	Psma1 (-14045)
B762	Brain	chr11	6799325	6799625	Adcy1 (-164017)
B763	Brain	chr11	6862845	6863145	Adcy1 (-100497)
B764	Brain	chr16	95208405	95208705	Kcnj6 (+10748)
B765	Brain	chr4	137288925	137289225	Rap1gap (+51457)
B766	Brain	chr8	85724525	85724825	Tbc1d9 (+35424)
B767	Brain	chr10	13802145	13802445	Hivep2 (+116110)
B768	Brain	chr16	24176105	24176405	Bcl6 (-187557)
B769	Brain	chr18	31123745	31124045	Rit2 (+352887)
B770	Brain	chr19	23449465	23449765	Mamdc2 (+73197)
B771	Brain	chr3	137127905	137128205	Gm4861 (+87531)
B772	Brain	chr3	153494285	153494585	Asb17 (-12776)
B773	Brain	chr5	140086585	140086885	Uncx (+66883)
B774	Brain	chr8	88649185	88649485	Phkb (+284434)
B775	Brain	chr9	62132125	62132425	Spesp1 (-2289)
B776	Brain	chr9	102178285	102178585	Ephb1 (+78588)
B777	Brain	chr11	82497345	82497645	Cct6b (+80295)
B778	Brain	chr16	37442645	37442945	Stxbp5l (-57751)
B779	Brain	chr17	49667385	49667685	Daam2 (+36127)
B780	Brain	chr5	147588625	147588925	Usp12 (+17757)
B781	Brain	chr11	53336465	53336765	Sept8 (+3313)
B782	Brain	chr16	31446205	31446505	Bdh1 (+23972)
B783	Brain	chr17	86649505	86649805	Prkce (+82530)
B784	Brain	chr18	33930125	33930425	Epb4.1l4a (+236585)
B785	Brain	chr4	9441985	9442285	Asph (+154174)
B786	Brain	chr5	147902185	147902485	Polr1d (+13218)
B787	Brain	chr7	151710325	151710625	Ppfia1 (+29159)
B788	Brain	chr9	40792465	40792765	Crtam (+20054)
B789	Brain	chr11	108758425	108758725	Axin2 (-23088)
B790	Brain	chr18	62301905	62302205	Adrb2 (+37558)
B791	Brain	chr7	148671565	148671865	Tspan4 (+10576)
B792	Brain	chr9	27001305	27001605	Jam3 (-38490)
B793	Brain	chr9	107863645	107863945	Traip (+10501)
B794	Brain	chr14	103478445	103478745	Cln5 (+9162)
B795	Brain	chr2	141444065	141444365	Flrt3 (-947003)
B796	Brain	chr7	85431825	85432125	Ntrk3 (+290749)
B797	Brain	chr8	117124105	117124405	Wwox (+160703)
B798	Brain	chr15	22100125	22100425	Gm5803 (+544464)
B799	Brain	chr15	31021685	31021985	Dap (-132305)
B800	Brain	chr4	64293285	64293585	Pappa (-491773)
B801	Brain	chr4	106140045	106140345	Pcsk9 (-3265)
B802	Brain	chr8	67138005	67138305	Cpe (+33682)
B803	Brain	chr1	22638865	22639165	Rims1 (+173548)
B804	Brain	chr18	13948965	13949265	Zfp521 (+182127)
B805	Brain	chr2	57753005	57753305	Galnt5 (-97411)
B806	Brain	chr8	5601165	5601465	Slc10a2 (-496083)
B807	Brain	chr8	72922085	72922385	Comp (+24788)
B808	Brain	chr9	41006965	41007265	Ubash3b (-41538)
B809	Brain	chr1	59369385	59369685	Cdk15 (+55784)
B810	Brain	chr1	151519325	151519625	Pla2g4a (+288939)
B811	Brain	chr10	80490085	80490385	Diras1 (-2113)
B812	Brain	chr4	128076225	128076525	Csmd2 (+4229)
B813	Brain	chr9	108030625	108030925	Apeh (-33964)
B814	Brain	chr1	23660505	23660805	B3gat2 (-108110)
B815	Brain	chr1	88909205	88909505	Alppl2 (+77148)
B816	Brain	chr14	55673065	55673365	Zfhx2 (+37670)
B817	Brain	chr15	74424465	74424765	1700016M24Rik (+42133)
B818	Brain	chr15	91444805	91445105	Slc2a13 (-41263)
B819	Brain	chr2	124857645	124857945	Slc24a5 (-36068)
B820	Brain	chr4	84980625	84980925	Sh3gl2 (+129415)
B821	Brain	chr7	73153465	73153765	Snrpa1 (-51607)
B822	Brain	chr7	146279025	146279325	Dpysl4 (+7275)
B823	Brain	chr9	94482725	94483025	1190002N15Rik (-44375)
B824	Brain	chr1	76734225	76734525	Epha4 (+777288)
B825	Brain	chr10	90062525	90062825	Apaf1 (+482813)
B826	Brain	chr12	32398645	32398945	Gpr22 (-4)
B827	Brain	chr12	99691425	99691725	Kcnk10 (+124575)
B828	Brain	chr13	59741445	59741745	Golm1 (+35550)
B829	Brain	chr14	103839485	103839785	Scel (-72923)
B830	Brain	chr15	8742125	8742425	Slc1a3 (-81468)
B831	Brain	chr17	28008845	28009145	Uhrf1bp1 (+15543)
B832	Brain	chr18	24493685	24493985	Galnt1 (+129990)
B833	Brain	chr2	167285005	167285305	Rnf114 (-32990)
B834	Brain	chr2	177865685	177865985	Phactr3 (+12155)
B835	Brain	chr4	8946465	8946765	Clvs1 (-249849)
B836	Brain	chr10	40408145	40408445	9030224M15Rik (+5207)
B837	Brain	chr12	45481825	45482125	Nrcam (+52103)
B838	Brain	chr13	108954165	108954465	Ercc8 (+5383)
B839	Brain	chr2	178008905	178009205	Sycp2 (+133308)
B840	Brain	chr6	126594705	126595005	Kcna1 (+964)
B841	Brain	chr15	4169165	4169465	Plcxd3 (-156176)
B842	Brain	chr16	6716365	6716665	Rbfox1 (-353413)
B843	Brain	chr16	82661325	82661625	NONE
B844	Brain	chr2	71873745	71874045	Rapgef4 (+54623)
B845	Brain	chr4	46074505	46074805	Tmod1 (+22561)
B846	Brain	chr8	60063265	60063565	Galnt7 (+68437)
B847	Brain	chr11	93135265	93135565	Car10 (+174811)
B848	Brain	chr12	91027265	91027565	Dio2 (+949463)
B849	Brain	chr13	114777105	114777405	Arl15 (+192539)
B850	Brain	chr18	74305865	74306165	Ska1 (+61457)
B851	Brain	chr3	126334565	126334865	Camk2d (+34824)
B852	Brain	chr5	24561205	24561505	Prkag2 (+45105)
B853	Brain	chr11	41930485	41930785	Gabra1 (+65797)
B854	Brain	chr15	41380925	41381225	Oxr1 (+102047)
B855	Brain	chr16	9993805	9994105	Grin2a (-1329)
B856	Brain	chr16	42360225	42360525	Gap43 (-19611)
B857	Brain	chr17	45667265	45667565	Tcte1 (+7032)
B858	Brain	chr18	77464105	77464405	St8sia5 (+39669)
B859	Brain	chr4	134009905	134010205	Stmn1 (-14180)
B860	Brain	chr9	37433325	37433625	Siae (+12043)
B861	Brain	chr1	59279025	59279325	Als2 (+14900)
B862	Brain	chr16	31876465	31876765	Mfi2 (-2281)
B863	Brain	chr5	125315605	125315905	Ccdc92 (+26836)
B864	Brain	chr6	89416325	89416625	Plxna1 (-103868)
B865	Brain	chr6	140467965	140468265	Plekha5 (+95495)
B866	Brain	chr1	24230165	24230465	Col9a1 (+45866)
B867	Brain	chr10	64349725	64350025	Lrrtm3 (-796872)
B868	Brain	chr11	78316465	78316765	Sebox (-400)
B869	Brain	chr16	22491885	22492185	Etv5 (-52392)
B870	Brain	chr17	63665025	63665325	Fbxl17 (+184754)
B871	Brain	chr18	35459425	35459725	Lrrtm2 (-84897)
B872	Brain	chr2	120830165	120830465	Ccndbp1 (-3829)
B873	Brain	chr8	27643985	27644285	Thap1 (+375494)
B874	Brain	chr10	4858065	4858365	Syne1 (+62366)
B875	Brain	chr10	16849625	16849925	Cited2 (-593259)
B876	Brain	chr10	83844205	83844505	Nuak1 (+58861)
B877	Brain	chr10	115517965	115518265	4933416C03Rik (+32858)
B878	Brain	chr13	59175205	59175505	Ntrk2 (+266161)
B879	Brain	chr15	30824885	30825185	Dap (-329105)
B880	Brain	chr17	73621305	73621605	Capn13 (+127181)
B881	Brain	chr2	37611765	37612065	Crb2 (-19854)
B882	Brain	chr4	47720885	47721185	Sec61b (+233502)
B883	Brain	chr5	150363825	150364125	Wdr95 (+32721)
B884	Brain	chr8	90192185	90192485	4933402J07Rik (+104529)
B885	Brain	chr9	108039905	108040205	Apeh (-43244)
B886	Brain	chr2	71854105	71854405	Rapgef4 (+34983)
B887	Brain	chr7	98721185	98721485	Dlg2 (+482039)
B888	Brain	chr8	11762085	11762385	Arhgef7 (+34130)
B889	Brain	chr8	128850665	128850965	Slc35f3 (+28336)
B890	Brain	chr9	91441965	91442265	Zic4 (+178305)
B891	Brain	chr10	115438965	115439265	Ptprr (-16304)
B892	Brain	chr11	94360345	94360645	Epn3 (+793)
B893	Brain	chr13	52605945	52606245	Diras2 (+20110)
B894	Brain	chr14	28673885	28674185	Erc2 (+238407)
B895	Brain	chr15	79923085	79923385	Syngr1 (+1471)
B896	Brain	chr2	101489225	101489525	Rag1 (+314)
B897	Brain	chr2	128959165	128959465	Chchd5 (+3879)
B898	Brain	chr2	136529145	136529445	Snap25 (-9891)
B899	Brain	chr4	46722425	46722725	Tbc1d2 (-59504)
B900	Brain	chr6	88440665	88440965	Ruvbl1 (+25398)
B901	Brain	chr18	62001465	62001765	Afap1l1 (-55299)
B902	Brain	chr2	149699105	149699405	Tmem90b (+42736)
B903	Brain	chr2	180854745	180855045	Kcnq2 (+15035)
B904	Brain	chr3	28449765	28450065	Slc2a2 (-146910)
B905	Brain	chr9	105978625	105978925	Col6a4 (+20247)
B906	Brain	chr1	111845185	111845485	Cdh7 (-34885)
B907	Brain	chr10	69172405	69172705	Ank3 (+176099)
B908	Brain	chr10	109127685	109127985	Nav3 (+309440)
B909	Brain	chr12	88305305	88305605	2310044G17Rik (+17162)
B910	Brain	chr14	68662825	68663125	Nefl (-38966)
B911	Brain	chr15	23326465	23326765	Cdh18 (+360397)
B912	Brain	chr4	101095645	101095945	Ak4 (+3901)
B913	Brain	chr9	108056405	108056705	Bsn (+36159)
B914	Brain	chr1	52578305	52578605	Nab1 (-21163)
B915	Brain	chr13	76703405	76703705	Mctp1 (+181146)
B916	Brain	chr15	88936585	88936885	Tubgcp6 (+16845)
B917	Brain	chr2	164313425	164313725	Dbndd2 (+1620)
B918	Brain	chr5	50037105	50037405	Gpr125 (+412980)
B919	Brain	chr5	118492665	118492965	Tesc (+14982)
B920	Brain	chr6	50316365	50316665	Osbpl3 (+16321)
B921	Brain	chr7	25754825	25755125	Rabac1 (+2772)
B922	Brain	chr8	4256965	4257265	Ctxn1 (+2159)
B923	Brain	chr8	115105385	115105685	Cntnap4 (+11592)
B924	Brain	chr16	77154105	77154405	Usp25 (+139941)
B925	Brain	chr2	118601605	118601905	Disp2 (-3700)
B926	Brain	chr9	29997705	29998005	Ntm (-227141)
B927	Brain	chr9	120606965	120607265	Rpl14 (+126481)
B928	Brain	chr11	118722625	118722925	Rbfox3 (+48111)
B929	Brain	chr12	104146445	104146745	Cox8c (+9079)
B930	Brain	chr15	37446885	37447185	Ncald (+274720)
B931	Brain	chr3	18583385	18583685	Cyp7b1 (-440197)
B932	Brain	chr5	43730385	43730685	Cpeb2 (+105833)
B933	Brain	chr6	48010425	48010725	Zfp777 (-12462)
B934	Brain	chr8	26415945	26416245	Tacc1 (-104174)
B935	Brain	chr8	113405925	113406225	Fuk (+20284)
B936	Brain	chr8	117956565	117956865	Maf (+274079)
B937	Brain	chr9	57781025	57781325	Sema7a (-6767)
B938	Brain	chr1	89814725	89815025	Dgkd (+65013)
B939	Brain	chr11	79317385	79317685	Omg (+49)
B940	Brain	chr16	16554245	16554545	Fgd4 (+5894)
B941	Brain	chr3	105456985	105457285	Ddx20 (+33354)
B942	Brain	chr5	28517685	28517985	En2 (+25599)
B943	Brain	chr8	121403905	121404205	Hsbp1 (-464383)
B944	Brain	chr1	22519405	22519705	Rims1 (+293008)
B945	Brain	chr1	25142525	25142825	Lmbrd1 (+457292)
B946	Brain	chr10	21588485	21588785	Sgk1 (-13355)
B947	Brain	chr11	113788585	113788885	Sdk2 (+138530)
B948	Brain	chr16	41872345	41872645	Lsamp (+339040)
B949	Brain	chr4	75821065	75821365	Ptprd (+418994)
B950	Brain	chr4	130417905	130418205	Laptm5 (-51194)
B951	Brain	chr9	100461005	100461305	Tmem22 (+10349)
B952	Brain	chr1	58796485	58796785	Cflar (+26505)
B953	Brain	chr11	118071545	118071845	Cyth1 (+2361)
B954	Brain	chr12	32577665	32577965	Hbp1 (+57585)
B955	Brain	chr2	18139585	18139885	Mllt10 (+162837)
B956	Brain	chr3	120953865	120954165	Tmem56 (+12219)
B957	Brain	chr5	35462785	35463085	Lrpap1 (-14589)
B958	Brain	chr7	86631525	86631825	Polg (-20516)
B959	Brain	chr8	129241645	129241945	Irf2bp2 (-124459)
B960	Brain	chr14	64200165	64200465	Xkr6 (-25052)
B961	Brain	chr16	67850545	67850845	Cadm2 (-229542)
B962	Brain	chr2	154391345	154391645	E2f1 (+4093)
B963	Brain	chr3	65103165	65103465	Ssr3 (+93160)
B964	Brain	chr5	21633445	21633745	Reln (+216928)
B965	Brain	chr5	107925105	107925405	A830010M20Rik (-1509)
B966	Brain	chr7	151736105	151736405	Ppfia1 (+3379)
B967	Brain	chr11	36370865	36371165	Odz2 (+386730)
B968	Brain	chr17	48691165	48691465	Unc5cl (+97089)
B969	Brain	chr2	32452285	32452585	St6galnac4 (+9425)
B970	Brain	chr3	65100965	65101265	Ssr3 (+95360)
B971	Brain	chr4	33823065	33823365	Cnr1 (-188392)
B972	Brain	chr5	107708265	107708565	Tgfbr3 (+10199)
B973	Brain	chr9	29148965	29149265	Ntm (+621599)
B974	Brain	chr11	35118725	35119025	Slit3 (+183917)
B975	Brain	chr13	49267785	49268085	Ninj1 (-14981)
B976	Brain	chr17	31268285	31268585	Tff3 (-1879)
B977	Brain	chr3	126447365	126447665	Camk2d (+147624)
B978	Brain	chr4	148691545	148691845	Kif1b (-9888)
B979	Brain	chr6	89187325	89187625	Gm1965 (+96476)
B980	Brain	chr15	95318485	95318785	Nell2 (+40502)
B981	Brain	chr3	137224125	137224425	Gm4861 (-8689)
B982	Brain	chr8	126953345	126953645	Pgbd5 (+4341)
B983	Brain	chr9	53152825	53153125	Kdelc2 (-39153)
B984	Brain	chr9	61628445	61628745	Rplp1 (+133722)
B985	Brain	chr10	19738185	19738485	Map3k5 (+84003)
B986	Brain	chr11	104491805	104492105	Itgb3 (+22641)
B987	Brain	chr4	90762805	90763105	Elavl2 (+275791)
B988	Brain	chr5	130950785	130951085	A330070K13Rik (-90434)
B989	Brain	chr6	24566765	24567065	Lmod2 (+19144)
B990	Brain	chr6	37146925	37147225	Dgki (+102901)
B991	Brain	chr6	75552645	75552945	NONE
B992	Brain	chr6	115918165	115918465	H1foo (+23358)
B993	Brain	chr8	12962625	12962925	Mcf2l (+46882)
B994	Brain	chr1	182437685	182437985	6330403A02Rik (-24200)
B995	Brain	chr11	104116045	104116345	Mapt (+23445)
B996	Brain	chr18	77461905	77462205	St8sia5 (+37469)
B997	Brain	chr19	21798385	21798685	Tmem2 (-54297)
B998	Brain	chr19	44475365	44475665	Scd1 (+6684)
B999	Brain	chr3	55247685	55247985	Dclk1 (+201387)
B1000	Brain	chr6	103508885	103509185	Chl1 (+48165)
H1	Heart	chr5	147136445	147136745	Wasf3 (-59987)
H2	Heart	chr9	24724485	24724785	Tbx20 (-145889)
H3	Heart	chr13	102820525	102820825	Pik3r1 (-282503)
H4	Heart	chr14	70605965	70606265	Sorbs3 (+1363)
H5	Heart	chr11	109736365	109736665	1700012B07Rik (-47155)
H6	Heart	chr11	112711885	112712185	Sox9 (+68511)
H7	Heart	chr3	107507325	107507625	Ahcyl1 (-8009)
H8	Heart	chr14	105759765	105760065	Ndfip2 (+102025)
H9	Heart	chr16	57928525	57928825	Col8a1 (-173825)
H10	Heart	chr10	76903585	76903885	Adarb1 (-22717)
H11	Heart	chr3	30445825	30446125	Mecom (-37566)
H12	Heart	chr1	12754285	12754585	Sulf1 (+45809)
H13	Heart	chr2	165948365	165948665	Sulf2 (+32641)
H14	Heart	chr13	104128765	104129065	Mast4 (-4343)
H15	Heart	chr6	116585245	116585545	Zfp422 (-6400)
H16	Heart	chr2	50545665	50545965	Mmadhc (-393618)
H17	Heart	chr6	29038345	29038645	Lep (+28274)
H18	Heart	chr15	66942065	66942365	St3gal1 (+66229)
H19	Heart	chr9	68250845	68251145	Rora (-250614)
H20	Heart	chr12	33569325	33569625	Nampt (+64275)
H21	Heart	chr13	13580165	13580465	Nid1 (+50446)
H22	Heart	chr4	114206485	114206785	Gm12824 (+127306)
H23	Heart	chr1	122654745	122655045	En1 (+155831)
H24	Heart	chr2	72885525	72885825	Sp3 (-67172)
H25	Heart	chr8	96395245	96395545	Gnao1 (+60657)
H26	Heart	chr7	73047165	73047465	Pcsk6 (+40293)
H27	Heart	chr14	55587185	55587485	Myh6 (-1891)
H28	Heart	chr14	63890265	63890565	Gata4 (-26318)
H29	Heart	chr16	33582005	33582305	Slc12a8 (+63740)
H30	Heart	chr15	103146405	103146705	Gpr84 (-5686)
H31	Heart	chr11	89962665	89962965	Tmem100 (+71153)
H32	Heart	chr16	24492665	24492965	Lpp (+44638)
H33	Heart	chr13	94905105	94905405	Lhfpl2 (+77504)
H34	Heart	chr14	63866565	63866865	Gata4 (-2618)
H35	Heart	chr2	103767685	103767985	Lmo2 (-42609)
H36	Heart	chr6	108609705	108610005	Bhlhe40 (-768)
H37	Heart	chr6	122458545	122458845	Mfap5 (-4999)
H38	Heart	chr10	77543045	77543345	Icosl (+11082)
H39	Heart	chr18	5806365	5806665	Zeb1 (+214626)
H40	Heart	chr9	36855145	36855445	Pknox2 (+99604)
H41	Heart	chr12	74126505	74126805	Six1 (+21044)
H42	Heart	chr15	52799405	52799705	Med30 (+255555)
H43	Heart	chr4	150087065	150087365	Slc45a1 (-60932)
H44	Heart	chr9	23200685	23200985	Bmper (+173315)
H45	Heart	chr2	163224985	163225285	Jph2 (-1449)
H46	Heart	chr9	69012505	69012805	Narg2 (-233150)
H47	Heart	chr3	87942485	87942785	Mef2d (-3682)
H48	Heart	chr6	115188725	115189025	Timp4 (+12992)
H49	Heart	chr12	46150885	46151185	Stxbp6 (+24435)
H50	Heart	chr3	79856845	79857145	Fam198b (+167143)
H51	Heart	chr7	28119525	28119825	Ltbp4 (+2956)
H52	Heart	chr10	118236805	118237105	Dyrk2 (+69004)
H53	Heart	chr16	43710785	43711085	Tigit (-46638)
H54	Heart	chr16	57928005	57928305	Col8a1 (-173305)
H55	Heart	chr5	74120885	74121185	Spata18 (+78416)
H56	Heart	chr13	12462165	12462465	Heatr1 (-25327)
H57	Heart	chr13	16807445	16807745	Inhba (+701311)
H58	Heart	chr18	56918005	56918305	Lmnb1 (+50688)
H59	Heart	chr15	51195005	51195305	Trps1 (-473568)
H60	Heart	chr7	143569545	143569845	Mgmt (-516599)
H61	Heart	chr15	94078805	94079105	Adamts20 (+155826)
H62	Heart	chr17	26626025	26626325	Dusp1 (+19242)
H63	Heart	chr18	56920565	56920865	Lmnb1 (+53248)
H64	Heart	chr3	123024585	123024885	Sec24d (+54321)
H65	Heart	chr5	77610565	77610865	Spink2 (+29763)
H66	Heart	chr6	91496165	91496465	Lsm3 (+30286)
H67	Heart	chr10	79499565	79499865	Polr2e (+2689)
H68	Heart	chr15	73576825	73577125	Ptp4a3 (+23400)
H69	Heart	chr3	109089585	109089885	Vav3 (-53866)
H70	Heart	chr7	117441205	117441505	Swap70 (+76138)
H71	Heart	chr5	75075685	75075985	Lnx1 (+23093)
H72	Heart	chr6	34700825	34701125	Agbl3 (-29457)
H73	Heart	chr7	146494985	146495285	Pwwp2b (+60754)
H74	Heart	chr1	92735305	92735605	Col6a3 (-27047)
H75	Heart	chr10	97052265	97052565	Kera (-17424)
H76	Heart	chr4	105858425	105858725	Usp24 (-130243)
H77	Heart	chr5	104665785	104666085	Dmp1 (+34299)
H78	Heart	chr5	112228705	112229005	Mn1 (+381669)
H79	Heart	chr14	34493885	34494185	Ptpn20 (+91579)
H80	Heart	chr5	20775245	20775545	Pion (+83310)
H81	Heart	chr5	30191005	30191305	Dnajb6 (+128717)
H82	Heart	chr14	105803505	105803805	4930449E01Rik (-94350)
H83	Heart	chr15	83056945	83057245	A4galt (+25109)
H84	Heart	chr6	24547505	24547805	Lmod2 (-116)
H85	Heart	chr8	59692825	59693125	Hand2 (-106805)
H86	Heart	chr18	46969525	46969825	4833403I15Rik (-40018)
H87	Heart	chr2	33015905	33016205	Angptl2 (-55426)
H88	Heart	chr2	119880525	119880825	Pla2g4b (+21506)
H89	Heart	chr2	167400405	167400705	Snai1 (+36828)
H90	Heart	chr6	55195705	55196005	Fam188b (+42478)
H91	Heart	chr19	27411065	27411365	Kcnv2 (+14106)
H92	Heart	chr4	97809565	97809865	Tm2d1 (+240241)
H93	Heart	chr11	7715825	7716125	Igfbp3 (-602049)
H94	Heart	chr3	83255265	83255565	Sfrp2 (-314828)
H95	Heart	chr1	122150345	122150645	Steap3 (+11362)
H96	Heart	chr10	17516985	17517285	Txlnb (+1110)
H97	Heart	chr15	103198585	103198885	Itga5 (-1556)
H98	Heart	chr16	44996925	44997225	Cd200r3 (+53284)
H99	Heart	chr2	21085865	21086165	Enkur (+40977)
H100	Heart	chr9	9412505	9412805	Arhgap42 (-173642)
H101	Heart	chr1	52479025	52479325	Nab1 (+78117)
H102	Heart	chr18	69320085	69320385	Tcf4 (-185140)
H103	Heart	chr2	14851565	14851865	Nsun6 (+119224)
H104	Heart	chr1	92553505	92553805	Cops8 (+53655)
H105	Heart	chr1	166726605	166726905	Dpt (-108)
H106	Heart	chr10	5864525	5864825	Gm221 (-28006)
H107	Heart	chr10	21672385	21672685	Sgk1 (+70545)
H108	Heart	chr13	12225805	12226105	Ryr2 (-26743)
H109	Heart	chr2	156452305	156452605	Dlgap4 (+13014)
H110	Heart	chr7	104411125	104411425	Kctd21 (-69558)
H111	Heart	chr7	119803865	119804165	Tead1 (-18819)
H112	Heart	chr8	3187485	3187785	Insr (+91982)
H113	Heart	chr9	114577285	114577585	Dync1li1 (-20514)
H114	Heart	chr18	80527845	80528145	Kcng2 (+32998)
H115	Heart	chr5	114110945	114111245	Cmklr1 (-10696)
H116	Heart	chr9	44542185	44542485	Phldb1 (+942)
H117	Heart	chr10	8656185	8656485	Sash1 (-50467)
H118	Heart	chr15	51079625	51079925	Trps1 (-358188)
H119	Heart	chr3	9123165	9123465	Zbtb10 (-127252)
H120	Heart	chr5	92058525	92058825	Parm1 (+111949)
H121	Heart	chr5	112049005	112049305	Mn1 (+201969)
H122	Heart	chr10	83693305	83693605	Nuak1 (+209761)
H123	Heart	chr12	9084625	9084925	Ttc32 (+47972)
H124	Heart	chr12	9231885	9232185	Ttc32 (+195232)
H125	Heart	chr15	33260125	33260425	Pgcp (+247391)
H126	Heart	chr5	72837385	72837685	Corin (+57912)
H127	Heart	chr4	81559205	81559505	Mpdz (-470646)
H128	Heart	chr5	74208465	74208765	Spata18 (+165996)
H129	Heart	chr5	101266985	101267285	Agpat9 (-8113)
H130	Heart	chr1	43314825	43315125	Rpl29 (+69009)
H131	Heart	chr10	24329665	24329965	Ctgf (+14567)
H132	Heart	chr10	96852885	96853185	Dcn (-89099)
H133	Heart	chr4	65209585	65209885	Trim32 (-56285)
H134	Heart	chr7	103861445	103861745	AK053790 (-83556)
H135	Heart	chr9	77686465	77686765	Elovl5 (-78557)
H136	Heart	chr10	52895845	52896145	Pln (-161497)
H137	Heart	chr12	25364925	25365225	Cys1 (+1585)
H138	Heart	chr16	37790105	37790405	Fstl1 (+13114)
H139	Heart	chr17	10667045	10667345	Qk (-154969)
H140	Heart	chr3	27890285	27890585	Pld1 (+52833)
H141	Heart	chr9	67413825	67414125	Tln2 (-6465)
H142	Heart	chr9	71252605	71252905	Grinl1a (+81035)
H143	Heart	chr10	67239585	67239885	Zfp365 (+135675)
H144	Heart	chr11	89985205	89985505	Tmem100 (+93693)
H145	Heart	chr15	40769225	40769525	Zfpm2 (+282787)
H146	Heart	chr9	71437085	71437385	Gcom1 (+2932)
H147	Heart	chr10	116479385	116479685	Lrrc10 (-2862)
H148	Heart	chr11	62737605	62737905	Cdrt4 (-26940)
H149	Heart	chr12	71699445	71699745	Tmx1 (+145454)
H150	Heart	chr19	53804425	53804725	Rbm20 (+52779)
H151	Heart	chr8	107134145	107134445	Cdh16 (+13866)
H152	Heart	chr8	123705185	123705485	Foxl1 (+53750)
H153	Heart	chr1	12761585	12761885	Sulf1 (+53109)
H154	Heart	chr11	116509985	116510285	Cygb (+5492)
H155	Heart	chr14	24313725	24314025	Kcnma1 (+509552)
H156	Heart	chr2	50546025	50546325	Mmadhc (-393978)
H157	Heart	chr2	74996665	74996965	Mtx2 (+332946)
H158	Heart	chr2	170155985	170156285	Bcas1 (+97210)
H159	Heart	chr3	21306125	21306425	Tbl1xr1 (-669299)
H160	Heart	chr7	104535065	104535365	Ndufc2 (-13298)
H161	Heart	chr8	123772785	123773085	Foxl1 (+121350)
H162	Heart	chr1	92418885	92419185	Cops8 (-80965)
H163	Heart	chr12	72727945	72728245	Daam1 (-203970)
H164	Heart	chr15	85069885	85070185	Fbln1 (+33597)
H165	Heart	chr2	118542425	118542725	Plcb2 (+11599)
H166	Heart	chr11	111597325	111597625	Kcnj2 (+669997)
H167	Heart	chr15	51423725	51424025	Eif3h (+273132)
H168	Heart	chr16	38362065	38362365	Popdc2 (-44)
H169	Heart	chr3	27658025	27658325	Fndc3b (-48814)
H170	Heart	chr4	141827485	141827785	9030409G11Rik (-61514)
H171	Heart	chr6	115182665	115182965	Timp4 (+19052)
H172	Heart	chr10	94780525	94780825	Cradd (+6056)
H173	Heart	chr12	33541845	33542145	Nampt (+36795)
H174	Heart	chr12	84099685	84099985	Rgs6 (+381810)
H175	Heart	chr14	70423045	70423345	Egr3 (-54057)
H176	Heart	chr4	132664505	132664805	Wasf2 (-21893)
H177	Heart	chr9	24701165	24701465	Tbx20 (-122569)
H178	Heart	chr1	137490525	137490825	Nav1 (-8743)
H179	Heart	chr1	188223765	188224065	Lyplal1 (-282726)
H180	Heart	chr10	56834525	56834825	Hsf2 (-371516)
H181	Heart	chr11	65117365	65117665	Myocd (-34024)
H182	Heart	chr12	100847925	100848225	Foxn3 (-159791)
H183	Heart	chr13	35555765	35556065	Cdyl (-277356)
H184	Heart	chr2	25255785	25256085	Npdc1 (-2668)
H185	Heart	chr2	50798285	50798585	Rnd3 (+206196)
H186	Heart	chr2	77150705	77151005	Sestd1 (-32173)
H187	Heart	chr2	173177365	173177665	Pmepa1 (-75481)
H188	Heart	chr6	118155265	118155565	Ret (-7653)
H189	Heart	chr8	71499665	71499965	Lpl (+95361)
H190	Heart	chr1	73718905	73719205	Tns1 (+451966)
H191	Heart	chr10	90730665	90730965	Tmpo (-96488)
H192	Heart	chr13	12430145	12430445	Actn2 (+2704)
H193	Heart	chr13	51408965	51409265	S1pr3 (-94872)
H194	Heart	chr14	26065205	26065505	Zmiz1 (-213423)
H195	Heart	chr4	63737565	63737865	Tnc (-29666)
H196	Heart	chr6	72543445	72543745	Elmod3 (+4741)
H197	Heart	chr6	84193425	84193725	Dysf (+224192)
H198	Heart	chr6	91152105	91152405	Fbln2 (-10503)
H199	Heart	chr9	110866105	110866405	Lrrc2 (+12206)
H200	Heart	chr15	51406325	51406625	Eif3h (+290532)
H201	Heart	chr15	63196105	63196405	Gsdmc (+444039)
H202	Heart	chr2	128296165	128296465	Anapc1 (+216816)
H203	Heart	chr2	148457445	148457745	Nxt1 (-40756)
H204	Heart	chr3	145560765	145561065	Bcl10 (-26427)
H205	Heart	chr5	122544525	122544825	Myl2 (-6314)
H206	Heart	chr6	118274625	118274925	Bms1 (+94660)
H207	Heart	chr6	121169485	121169785	Tuba8 (+8847)
H208	Heart	chr11	50520765	50521065	Adamts2 (+105328)
H209	Heart	chr13	60511125	60511425	Dapk1 (-192033)
H210	Heart	chr15	57543925	57544225	Zhx2 (+17853)
H211	Heart	chr2	31195385	31195685	Ncs1 (+94092)
H212	Heart	chr2	85012645	85012945	Lrrc55 (+24061)
H213	Heart	chr4	153602465	153602765	Megf6 (+57793)
H214	Heart	chr9	61293445	61293745	Tle3 (+73422)
H215	Heart	chr9	87986625	87986925	Nt5e (-235672)
H216	Heart	chr11	88473505	88473805	Msi2 (+105926)
H217	Heart	chr11	117419305	117419605	Tnrc6c (-96148)
H218	Heart	chr13	46522305	46522605	Rbm24 (+8786)
H219	Heart	chr13	113173265	113173565	Il6st (-80863)
H220	Heart	chr15	33356605	33356905	Tspyl5 (+260883)
H221	Heart	chr6	91135565	91135865	Fbln2 (-27043)
H222	Heart	chr7	20237965	20238265	Clptm1 (+12264)
H223	Heart	chr7	106883085	106883385	Olfr520 (-420)
H224	Heart	chr9	49413885	49414185	Ttc12 (-119705)
H225	Heart	chr10	6535385	6535685	Plekhg1 (-61661)
H226	Heart	chr13	4771565	4771865	Akr1e1 (-163305)
H227	Heart	chr15	76853045	76853345	Apol6 (-22511)
H228	Heart	chr2	30444725	30445025	Cstad (-5689)
H229	Heart	chr3	57056505	57056805	Tm4sf1 (+49186)
H230	Heart	chr5	149083665	149083965	Slc7a1 (+127665)
H231	Heart	chr5	150750125	150750425	Rxfp2 (-70975)
H232	Heart	chr6	24533465	24533765	Lmod2 (-14156)
H233	Heart	chr6	94570725	94571025	Lrig1 (+79264)
H234	Heart	chr7	4473985	4474285	Tnni3 (-90)
H235	Heart	chr7	124614045	124614345	Xylt1 (+89702)
H236	Heart	chr7	149885285	149885585	Ins2 (-19822)
H237	Heart	chr9	67011525	67011825	Tpm1 (-114655)
H238	Heart	chr9	110665945	110666245	Myl3 (-90)
H239	Heart	chr1	151745185	151745485	Pla2g4a (+63079)
H240	Heart	chr10	77542685	77542985	Icosl (+10722)
H241	Heart	chr14	63685805	63686105	Defb42 (+20127)
H242	Heart	chr15	31117265	31117565	Dap (-36725)
H243	Heart	chr16	76787065	76787365	Usp25 (-227099)
H244	Heart	chr19	27174345	27174645	Vldlr (-117015)
H245	Heart	chr3	38262845	38263145	Ankrd50 (+91774)
H246	Heart	chr3	135230905	135231205	Manba (+82480)
H247	Heart	chr5	54341525	54341825	Stim2 (-48087)
H248	Heart	chr5	112234965	112235265	Mn1 (+387929)
H249	Heart	chr7	96248225	96248525	Tmem135 (+238922)
H250	Heart	chr1	52480645	52480945	Nab1 (+76497)
H251	Heart	chr1	92399425	92399725	Cops8 (-100425)
H252	Heart	chr1	137732585	137732885	Tnnt2 (-228)
H253	Heart	chr10	94824185	94824485	Cradd (-37604)
H254	Heart	chr16	84771765	84772065	Jam2 (-2453)
H255	Heart	chr2	118576265	118576565	A430105I19Rik (+11982)
H256	Heart	chr2	125356565	125356865	Fbn1 (-24541)
H257	Heart	chr2	167395805	167396105	Snai1 (+32228)
H258	Heart	chr4	107691965	107692265	Podn (+12580)
H259	Heart	chr7	108234345	108234645	Fchsd2 (-22794)
H260	Heart	chr8	46957545	46957845	Pdlim3 (-13144)
H261	Heart	chr10	13768085	13768385	Hivep2 (+82050)
H262	Heart	chr14	30858545	30858845	Chdh (+36509)
H263	Heart	chr18	73731605	73731905	Mex3c (-604)
H264	Heart	chr5	122449025	122449325	Cux2 (+48659)
H265	Heart	chr5	138110225	138110525	Agfg2 (+15546)
H266	Heart	chr6	42309465	42309765	Zyx (+9788)
H267	Heart	chr7	17346285	17346585	Slc1a5 (-20260)
H268	Heart	chr7	96248405	96248705	Tmem135 (+238742)
H269	Heart	chr8	64160065	64160365	Cbr4 (+193684)
H270	Heart	chr1	36629585	36629885	Sema4c (-14509)
H271	Heart	chr10	13387245	13387545	Pex3 (-114447)
H272	Heart	chr11	44056745	44057045	Il12b (-156670)
H273	Heart	chr11	65023005	65023305	Arhgap44 (-46692)
H274	Heart	chr11	78894445	78894745	Ksr1 (+65261)
H275	Heart	chr14	46915985	46916285	Gm15217 (-83007)
H276	Heart	chr15	97961505	97961805	Asb8 (+14478)
H277	Heart	chr17	64449525	64449825	Fert2 (+204308)
H278	Heart	chr18	49871225	49871525	Dtwd2 (+43880)
H279	Heart	chr18	66543305	66543605	Pmaip1 (-74803)
H280	Heart	chr2	124348285	124348585	Sema6d (-87597)
H281	Heart	chr2	127963305	127963605	Bcl2l11 (+11681)
H282	Heart	chr3	107644305	107644605	Eps8l3 (-35693)
H283	Heart	chr5	150185265	150185565	6330406I15Rik (-28966)
H284	Heart	chr6	91157545	91157845	Fbln2 (-5063)
H285	Heart	chr9	24701485	24701785	Tbx20 (-122889)
H286	Heart	chr1	43316705	43317005	Rpl29 (+70889)
H287	Heart	chr11	46089685	46089985	Cyfip2 (+36017)
H288	Heart	chr14	55585425	55585725	Myh6 (-131)
H289	Heart	chr18	25007185	25007485	Fhod3 (+139389)
H290	Heart	chr18	38955665	38955965	Gm5820 (-96295)
H291	Heart	chr2	75047145	75047445	Mtx2 (+383426)
H292	Heart	chr8	15058865	15059165	Myom2 (+1362)
H293	Heart	chr1	193770245	193770545	Rd3 (-30859)
H294	Heart	chr10	53595805	53596105	Fam184a (-125240)
H295	Heart	chr10	93895725	93896025	Tmcc3 (-81727)
H296	Heart	chr12	10521225	10521525	Rdh14 (+123789)
H297	Heart	chr12	109546585	109546885	Hhipl1 (+2255)
H298	Heart	chr13	41825065	41825365	Gm5082 (+80403)
H299	Heart	chr15	85008685	85008985	Fbln1 (-27603)
H300	Heart	chr19	40509605	40509905	Sorbs1 (+78547)
H301	Heart	chr3	107632545	107632845	Eps8l3 (-47453)
H302	Heart	chr4	53651525	53651825	Fsd1l (+7332)
H303	Heart	chr4	97924585	97924885	Tm2d1 (+125221)
H304	Heart	chr5	53863805	53864105	Rbpj (-117499)
H305	Heart	chr5	58135225	58135525	Pcdh7 (+26115)
H306	Heart	chr6	139857585	139857885	Plcz1 (+132203)
H307	Heart	chr7	104411345	104411645	Kctd21 (-69338)
H308	Heart	chr8	71426885	71427185	Lpl (+22581)
H309	Heart	chr8	75023545	75023845	Slc35e1 (-7182)
H310	Heart	chr8	130357885	130358185	Nrp1 (-524938)
H311	Heart	chr10	96852305	96852605	Dcn (-89679)
H312	Heart	chr11	75726505	75726805	Rph3al (-2094)
H313	Heart	chr11	109749045	109749345	1700012B07Rik (-59835)
H314	Heart	chr15	101139385	101139685	9430023L20Rik (+24803)
H315	Heart	chr18	35211705	35212005	Ctnna1 (-66711)
H316	Heart	chr19	36757105	36757405	Ppp1r3c (+53839)
H317	Heart	chr2	163218245	163218545	Jph2 (+5291)
H318	Heart	chr1	108479785	108480085	Bcl2 (+130932)
H319	Heart	chr1	155769845	155770145	Glul (+22920)
H320	Heart	chr10	67565405	67565705	Rtkn2 (+123209)
H321	Heart	chr10	75050565	75050865	Ggt5 (-1411)
H322	Heart	chr11	45924125	45924425	Adam19 (+54786)
H323	Heart	chr11	85835925	85836225	Tbx4 (+132510)
H324	Heart	chr12	82251925	82252225	Smoc1 (+124280)
H325	Heart	chr13	60173045	60173345	Gas1 (+105701)
H326	Heart	chr14	12695845	12696145	Ptprg (+309928)
H327	Heart	chr15	62034345	62034645	H2afy2 (+16511)
H328	Heart	chr18	16874065	16874365	Cdh2 (+93343)
H329	Heart	chr18	66446385	66446685	Ccbe1 (+4957)
H330	Heart	chr4	154515165	154515465	Morn1 (+54629)
H331	Heart	chr8	11913545	11913845	1700018L24Rik (+73174)
H332	Heart	chr9	109752005	109752305	Camp (-185)
H333	Heart	chr10	8488505	8488805	Sash1 (+117213)
H334	Heart	chr11	51156765	51157065	Col23a1 (+53493)
H335	Heart	chr11	98239165	98239465	Tcap (-5810)
H336	Heart	chr12	8454565	8454865	Rhob (+52076)
H337	Heart	chr12	32388865	32389165	Gpr22 (+9776)
H338	Heart	chr12	53978025	53978325	Akap6 (+177805)
H339	Heart	chr13	13577985	13578285	Nid1 (+48266)
H340	Heart	chr14	27984405	27984705	Arhgef3 (-66670)
H341	Heart	chr15	7139725	7140025	Lifr (+49333)
H342	Heart	chr15	78954225	78954525	Micall1 (+14962)
H343	Heart	chr19	17304525	17304825	Gcnt1 (+126482)
H344	Heart	chr2	117854685	117854985	Thbs1 (-82823)
H345	Heart	chr2	121375405	121375705	Wdr76 (+43096)
H346	Heart	chr4	100022805	100023105	Ube2u (-128517)
H347	Heart	chr6	53287425	53287725	Creb5 (-235793)
H348	Heart	chr9	43290785	43291085	Trim29 (+172089)
H349	Heart	chr1	135367345	135367645	Sox13 (-46706)
H350	Heart	chr12	30709305	30709605	Pxdn (+86554)
H351	Heart	chr15	34895685	34895985	Kcns2 (+128699)
H352	Heart	chr15	99174945	99175245	Fmnl3 (+25802)
H353	Heart	chr17	27005765	27006065	Nkx2-5 (-27405)
H354	Heart	chr17	66029525	66029825	Txndc2 (-40579)
H355	Heart	chr19	56849225	56849525	A630007B06Rik (+38804)
H356	Heart	chr2	131227585	131227885	Rnf24 (-49107)
H357	Heart	chr5	101016665	101016965	Plac8 (-15591)
H358	Heart	chr7	88711825	88712125	Fsd2 (-108)
H359	Heart	chr8	27669725	27670025	Thap1 (+401234)
H360	Heart	chr10	4325285	4325585	Rgs17 (-98706)
H361	Heart	chr12	104590965	104591265	Asb2 (+3096)
H362	Heart	chr13	32328225	32328525	Gmds (+102038)
H363	Heart	chr19	53791045	53791345	Rbm20 (+39399)
H364	Heart	chr2	21089545	21089845	Enkur (+37297)
H365	Heart	chr2	172912865	172913165	Ctcfl (+32011)
H366	Heart	chr3	37241785	37242085	Fgf2 (-5640)
H367	Heart	chr4	47657965	47658265	Sec61b (+170582)
H368	Heart	chr4	129989865	129990165	Fabp3 (+3993)
H369	Heart	chr4	141204145	141204445	Plekhm2 (+15747)
H370	Heart	chr5	24046205	24046505	Asb10 (-89)
H371	Heart	chr8	23576285	23576585	Slc20a2 (-10737)
H372	Heart	chr8	80548865	80549165	Ttc29 (-188226)
H373	Heart	chr8	95565125	95565425	Ces1a (+6816)
H374	Heart	chr1	40320545	40320845	Il1r1 (-2736)
H375	Heart	chr1	134243125	134243425	Nuak2 (+30573)
H376	Heart	chr10	9322665	9322965	Samd5 (+72191)
H377	Heart	chr11	111741505	111741805	Kcnj2 (+814177)
H378	Heart	chr11	116509045	116509345	Cygb (+6432)
H379	Heart	chr13	29291625	29291925	Sox4 (-246224)
H380	Heart	chr15	34349705	34350005	Rpl30 (+23176)
H381	Heart	chr17	73325665	73325965	Lbh (+58170)
H382	Heart	chr18	66389345	66389645	Ccbe1 (+61997)
H383	Heart	chr2	117666185	117666485	Thbs1 (-271323)
H384	Heart	chr2	150598485	150598785	Pygb (-13897)
H385	Heart	chr3	85322005	85322305	Pet112l (-55896)
H386	Heart	chr4	40820345	40820645	B4galt1 (-19464)
H387	Heart	chr4	137032905	137033205	Hspg2 (+8337)
H388	Heart	chr7	17497765	17498065	Ptgir (+6076)
H389	Heart	chr9	25381345	25381645	Eepd1 (+92313)
H390	Heart	chr1	34186585	34186885	Dst (+118065)
H391	Heart	chr1	43304445	43304745	Rpl29 (+58629)
H392	Heart	chr1	136806645	136806945	Ppp1r12b (+45722)
H393	Heart	chr11	118309765	118310065	C1qtnf1 (+5067)
H394	Heart	chr12	113905805	113906105	Akt1 (+6532)
H395	Heart	chr13	53128985	53129285	Nfil3 (-52727)
H396	Heart	chr14	35387325	35387625	Ldb3 (+14392)
H397	Heart	chr15	85075665	85075965	Fbln1 (+39377)
H398	Heart	chr16	33683365	33683665	Heg1 (-1037)
H399	Heart	chr17	34822725	34823025	Tnxb (+15395)
H400	Heart	chr19	53182425	53182725	Add3 (-35912)
H401	Heart	chr2	109925885	109926185	Ccdc34 (+68061)
H402	Heart	chr2	151764625	151764925	Angpt4 (+27707)
H403	Heart	chr3	19544285	19544585	Trim55 (-25)
H404	Heart	chr4	137029605	137029905	Hspg2 (+5037)
H405	Heart	chr5	122959665	122959965	Atp2a2 (-7581)
H406	Heart	chr8	59799565	59799865	Hand2 (-65)
H407	Heart	chr8	125739365	125739665	4732415M23Rik (+2757)
H408	Heart	chr1	193123165	193123465	Nenf (+18682)
H409	Heart	chr10	42654565	42654865	Scml4 (+74397)
H410	Heart	chr11	98244965	98245265	Tcap (-10)
H411	Heart	chr11	109783665	109783965	Abca8b (+73315)
H412	Heart	chr12	74882425	74882725	Hif1a (-126279)
H413	Heart	chr13	43229905	43230205	Tbc1d7 (+36673)
H414	Heart	chr15	12679745	12680045	6030458C11Rik (+74517)
H415	Heart	chr18	32078285	32078585	Sft2d3 (-6878)
H416	Heart	chr19	10087245	10087545	Rab3il1 (-5323)
H417	Heart	chr19	40800645	40800945	Entpd1 (+66511)
H418	Heart	chr2	21086085	21086385	Enkur (+40757)
H419	Heart	chr2	75180005	75180305	Hnrnpa3 (-317161)
H420	Heart	chr2	75195065	75195365	Hnrnpa3 (-302101)
H421	Heart	chr4	94469985	94470285	Tek (+64144)
H422	Heart	chr6	142470185	142470485	Ldhb (-13872)
H423	Heart	chr7	71032245	71032545	Klf13 (+51406)
H424	Heart	chr8	46692425	46692725	Sorbs2 (+99426)
H425	Heart	chr9	32778965	32779265	Ets1 (+275488)
H426	Heart	chr11	90004365	90004665	Mmd (-105604)
H427	Heart	chr11	116952745	116953045	Sec14l1 (-23591)
H428	Heart	chr12	56498545	56498845	Psma6 (-1117)
H429	Heart	chr12	93024825	93025125	Ston2 (-99)
H430	Heart	chr14	29346165	29346465	Wnt5a (+27656)
H431	Heart	chr15	12688305	12688605	6030458C11Rik (+65957)
H432	Heart	chr18	39391805	39392105	Arhgap26 (+239156)
H433	Heart	chr2	35283105	35283405	4930402F06Rik (-30560)
H434	Heart	chr3	101197685	101197985	Igsf3 (+16787)
H435	Heart	chr5	73273645	73273945	Tec (-14108)
H436	Heart	chr9	79813285	79813585	Filip1 (+12254)
H437	Heart	chr9	104032505	104032805	Ccrl1 (-3682)
H438	Heart	chr1	137435045	137435345	Nav1 (+46737)
H439	Heart	chr11	61308205	61308505	Mapk7 (-650)
H440	Heart	chr11	69265645	69265945	Kdm6b (-38620)
H441	Heart	chr11	82724545	82724845	Unc45b (-60)
H442	Heart	chr13	29282425	29282725	Sox4 (-237024)
H443	Heart	chr13	92016425	92016725	Ckmt2 (-85)
H444	Heart	chr14	26595905	26596205	Zcchc24 (-7713)
H445	Heart	chr14	67976445	67976745	Gm6878 (-43047)
H446	Heart	chr15	83963965	83964265	Pnpla5 (-10510)
H447	Heart	chr17	9949605	9949905	Pabpc6 (-87186)
H448	Heart	chr19	24081565	24081865	Fam189a2 (+23794)
H449	Heart	chr2	167623625	167623925	Cebpb (+109360)
H450	Heart	chr3	33888225	33888525	Fxr1 (-30626)
H451	Heart	chr3	63243705	63244005	Mme (+144061)
H452	Heart	chr4	149223165	149223465	Slc25a33 (-74939)
H453	Heart	chr5	122970885	122971185	Atp2a2 (-18801)
H454	Heart	chr7	26514925	26515225	Ccdc97 (-11003)
H455	Heart	chr7	78728645	78728945	Mctp2 (+722686)
H456	Heart	chr7	109537685	109537985	Rrm1 (-52374)
H457	Heart	chr8	96123765	96124065	Ces5a (-64308)
H458	Heart	chr8	111267145	111267445	Zfhx3 (+28751)
H459	Heart	chr9	63725625	63725925	Smad3 (-119974)
H460	Heart	chr9	123400125	123400425	Limd1 (+12456)
H461	Heart	chrX	137070145	137070445	Tsc22d3 (+64766)
H462	Heart	chr1	130953845	130954145	Thsd7b (-215886)
H463	Heart	chr1	153443725	153444025	Fam129a (+25372)
H464	Heart	chr10	70287165	70287465	Phyhipl (-225276)
H465	Heart	chr11	74251785	74252085	Olfr412 (+73762)
H466	Heart	chr14	68286685	68286985	Cdca2 (+46832)
H467	Heart	chr17	14654345	14654645	Thbs2 (+176774)
H468	Heart	chr17	16009125	16009425	Rgmb (-45725)
H469	Heart	chr19	45101785	45102085	Lzts2 (+12269)
H470	Heart	chr2	30444445	30444745	Cstad (-5969)
H471	Heart	chr5	112239525	112239825	Mn1 (+392489)
H472	Heart	chr7	19668665	19668965	Dmpk (-383)
H473	Heart	chr7	135681225	135681525	Bag3 (+14278)
H474	Heart	chr1	92572765	92573065	Cops8 (+72915)
H475	Heart	chr10	76195585	76195885	Col6a1 (-6946)
H476	Heart	chr11	62757045	62757345	Cdrt4 (-7500)
H477	Heart	chr12	76411845	76412145	Rhoj (+2695)
H478	Heart	chr13	81079685	81079985	Arrdc3 (+57152)
H479	Heart	chr13	98629025	98629325	Rgnef (+346945)
H480	Heart	chr14	102315125	102315425	Lmo7 (+186130)
H481	Heart	chr15	85017365	85017665	Fbln1 (-18923)
H482	Heart	chr17	71388165	71388465	Myom1 (+19418)
H483	Heart	chr18	5806645	5806945	Zeb1 (+214906)
H484	Heart	chr18	33782665	33782965	D0H4S114 (-159132)
H485	Heart	chr19	53735205	53735505	Rbm20 (-16441)
H486	Heart	chr2	7163325	7163625	Celf2 (-161127)
H487	Heart	chr2	76819825	76820125	Ttn (+629)
H488	Heart	chr2	103739925	103740225	Lmo2 (-70369)
H489	Heart	chr2	166183305	166183605	Sulf2 (-202299)
H490	Heart	chr3	58608685	58608985	Clrn1 (+80299)
H491	Heart	chr3	109112205	109112505	Vav3 (-31246)
H492	Heart	chr4	57619145	57619445	Akap2 (-248139)
H493	Heart	chr4	63203345	63203645	Atp6v1g1 (-2304)
H494	Heart	chr5	129571845	129572145	Gpr133 (-30630)
H495	Heart	chr6	42324805	42325105	Epha1 (-1688)
H496	Heart	chr6	53664985	53665285	Tril (+105684)
H497	Heart	chr7	124637745	124638045	Xylt1 (+113402)
H498	Heart	chr8	42091565	42091865	Pdgfrl (+80128)
H499	Heart	chr9	67397085	67397385	Tln2 (+10275)
H500	Heart	chr9	90442805	90443105	Tbc1d2b (-277348)
H501	Heart	chr9	102874825	102875125	Slco2a1 (-34685)
H502	Heart	chr1	175981725	175982025	Olfr432 (+1369)
H503	Heart	chr12	86536125	86536425	Pgf (-18040)
H504	Heart	chr12	108991245	108991545	Bcl11b (+250229)
H505	Heart	chr13	46509045	46509345	Rbm24 (-4474)
H506	Heart	chr17	80136985	80137285	Cyp1b1 (-22754)
H507	Heart	chr19	41081805	41082105	Blnk (-12930)
H508	Heart	chr19	41226925	41227225	Tll2 (+54189)
H509	Heart	chr2	30118345	30118645	Phyhd1 (-3574)
H510	Heart	chr3	21852385	21852685	Tbl1xr1 (-123039)
H511	Heart	chr3	100797065	100797365	Ttf2 (-23629)
H512	Heart	chr3	103452465	103452765	Syt6 (+73411)
H513	Heart	chr4	94405505	94405805	Tek (-336)
H514	Heart	chr4	140977325	140977625	Hspb7 (+781)
H515	Heart	chr4	141152925	141153225	Fblim1 (+2764)
H516	Heart	chr5	52743105	52743405	Sod3 (-11788)
H517	Heart	chr7	82007745	82008045	Slco3a1 (-308229)
H518	Heart	chr7	99606325	99606625	Ccdc90b (-103184)
H519	Heart	chr8	48869885	48870185	Cldn24 (-37462)
H520	Heart	chr8	95349965	95350265	Mmp2 (-1112)
H521	Heart	chr8	127892225	127892525	Sipa1l2 (+124358)
H522	Heart	chr9	44282445	44282745	Upk2 (-19745)
H523	Heart	chr1	91441685	91441985	Agap1 (+90449)
H524	Heart	chr1	190989045	190989345	Kctd3 (-157476)
H525	Heart	chr10	13216185	13216485	Fuca2 (-4499)
H526	Heart	chr10	22607305	22607605	Tcf21 (-67521)
H527	Heart	chr10	82631525	82631825	Slc41a2 (+168887)
H528	Heart	chr12	37995285	37995585	Tmem195 (+27209)
H529	Heart	chr12	55387965	55388265	Egln3 (-83254)
H530	Heart	chr13	32348045	32348345	Gmds (+82218)
H531	Heart	chr15	3459145	3459445	Ghr (+73935)
H532	Heart	chr15	25656705	25657005	Myo10 (+104550)
H533	Heart	chr16	94689325	94689625	Dscr3 (+58761)
H534	Heart	chr17	12932405	12932705	Igf2r (+30017)
H535	Heart	chr18	14008945	14009245	Zfp521 (+122147)
H536	Heart	chr19	38031785	38032085	Myof (+86132)
H537	Heart	chr19	53787865	53788165	Rbm20 (+36219)
H538	Heart	chr19	56810785	56811085	Adrb1 (+14073)
H539	Heart	chr2	31226905	31227205	Hmcn2 (-66527)
H540	Heart	chr2	128333365	128333665	Anapc1 (+179616)
H541	Heart	chr2	150652205	150652505	Pygb (+39823)
H542	Heart	chr4	34855385	34855685	Cga (+14507)
H543	Heart	chr4	141207265	141207565	Plekhm2 (+12627)
H544	Heart	chr5	113628545	113628845	Tmem211 (-27234)
H545	Heart	chr7	30988365	30988665	Capns1 (-8448)
H546	Heart	chr7	90917905	90918205	1700026D08Rik (+25294)
H547	Heart	chr1	92105065	92105365	Cxcr7 (+4637)
H548	Heart	chr1	170164505	170164805	Pbx1 (+197734)
H549	Heart	chr10	24313385	24313685	Ctgf (-1713)
H550	Heart	chr11	31563465	31563765	Bod1 (+8247)
H551	Heart	chr12	37740985	37741285	Meox2 (-93998)
H552	Heart	chr12	88272865	88273165	2310044G17Rik (-15278)
H553	Heart	chr15	32216105	32216405	Sema5a (+41687)
H554	Heart	chr16	56610645	56610945	Tfg (+106672)
H555	Heart	chr17	84392425	84392725	Haao (-146445)
H556	Heart	chr2	33016185	33016485	Angptl2 (-55146)
H557	Heart	chr2	76820525	76820825	Ttn (-71)
H558	Heart	chr2	163189025	163189325	Jph2 (+34511)
H559	Heart	chr3	21171145	21171445	Tbl1xr1 (-804279)
H560	Heart	chr3	101608305	101608605	BC037703 (+31691)
H561	Heart	chr3	101903245	101903545	Casq2 (+12962)
H562	Heart	chr5	39520205	39520505	Clnk (-252423)
H563	Heart	chr5	43847305	43847605	C1qtnf7 (-145706)
H564	Heart	chr5	107491305	107491605	Cdc7 (+98114)
H565	Heart	chr5	113325325	113325625	Myo18b (-93)
H566	Heart	chr6	24523385	24523685	Lmod2 (-24236)
H567	Heart	chr6	119130225	119130525	Dcp1b (+5104)
H568	Heart	chr9	120570405	120570705	Rpl14 (+89921)
H569	Heart	chr1	43253845	43254145	Rpl29 (+8029)
H570	Heart	chr1	75545925	75546225	Slc4a3 (+3234)
H571	Heart	chr1	137758665	137758965	Tnnt2 (+25852)
H572	Heart	chr1	172629685	172629985	Olfml2b (+55172)
H573	Heart	chr10	85629625	85629925	Timp3 (-133382)
H574	Heart	chr11	35065485	35065785	Slit3 (+130677)
H575	Heart	chr11	65057105	65057405	Myocd (+26236)
H576	Heart	chr12	74487865	74488165	Slc38a6 (+100173)
H577	Heart	chr13	109243585	109243885	Depdc1b (+137204)
H578	Heart	chr15	34264945	34265245	Matn2 (+28659)
H579	Heart	chr16	16256805	16257105	Pkp2 (+43517)
H580	Heart	chr17	7814145	7814445	Fndc1 (+183544)
H581	Heart	chr17	75922065	75922365	Fam98a (+29071)
H582	Heart	chr2	31197745	31198045	Hmcn2 (-95687)
H583	Heart	chr2	85121265	85121565	Olfr987 (+50638)
H584	Heart	chr2	135397285	135397585	Plcb4 (-170131)
H585	Heart	chr2	163170725	163171025	Jph2 (+52811)
H586	Heart	chr3	95493505	95493805	Adamtsl4 (-1874)
H587	Heart	chr5	52741765	52742065	Sod3 (-13128)
H588	Heart	chr5	114100325	114100625	Cmklr1 (-76)
H589	Heart	chr6	21061285	21061585	Kcnd2 (-104674)
H590	Heart	chr6	51031085	51031385	Nfe2l3 (-351434)
H591	Heart	chr6	137506245	137506545	Eps8 (+91246)
H592	Heart	chr8	74855605	74855905	Klf2 (+12794)
H593	Heart	chr9	33741705	33742005	Kirrel3 (-554434)
H594	Heart	chr9	45176685	45176985	Fxyd6 (-1433)
H595	Heart	chr9	58147185	58147485	Loxl1 (+13684)
H596	Heart	chr9	90093645	90093945	Adamts7 (+35979)
H597	Heart	chr9	100371785	100372085	Il20rb (+14957)
H598	Heart	chr9	118940965	118941265	Vill (-20781)
H599	Heart	chr1	40862225	40862525	Tmem182 (-71)
H600	Heart	chr1	76547525	76547825	Epha4 (+963988)
H601	Heart	chr1	145902725	145903025	Rgs2 (-51596)
H602	Heart	chr1	187987125	187987425	Lyplal1 (-46086)
H603	Heart	chr10	4318605	4318905	Rgs17 (-105386)
H604	Heart	chr11	62939265	62939565	Pmp22 (-5597)
H605	Heart	chr11	101117805	101118105	Vps25 (+3037)
H606	Heart	chr12	45960465	45960765	Stxbp6 (+214855)
H607	Heart	chr12	86226105	86226405	Ltbp2 (-8810)
H608	Heart	chr13	104144885	104145185	Mast4 (-20463)
H609	Heart	chr15	52970485	52970785	Ext1 (+207103)
H610	Heart	chr15	58104445	58104745	Klhl38 (+51129)
H611	Heart	chr15	97979825	97980125	Asb8 (-3842)
H612	Heart	chr15	103147645	103147945	Gpr84 (-6926)
H613	Heart	chr16	25263065	25263365	Tprg (-23688)
H614	Heart	chr16	57863325	57863625	Col8a1 (-108625)
H615	Heart	chr18	5802945	5803245	Zeb1 (+211206)
H616	Heart	chr18	63708545	63708845	Txnl1 (+143318)
H617	Heart	chr18	69281165	69281465	Tcf4 (-224060)
H618	Heart	chr2	131304265	131304565	Smox (-13183)
H619	Heart	chr2	148687485	148687785	9230104L09Rik (-10965)
H620	Heart	chr3	28040625	28040925	Tnik (-121361)
H621	Heart	chr3	100926465	100926765	Ptgfrn (-12526)
H622	Heart	chr3	102474025	102474325	Tspan2 (-64518)
H623	Heart	chr4	108917145	108917445	Calr4 (+9058)
H624	Heart	chr4	148252985	148253285	Casz1 (+74634)
H625	Heart	chr5	21038825	21039125	Lrrc17 (-10370)
H626	Heart	chr5	35975545	35975845	Htra3 (+46736)
H627	Heart	chr5	74641825	74642125	Rasl11b (+50624)
H628	Heart	chr6	8055965	8056265	Col28a1 (+86502)
H629	Heart	chr6	119146465	119146765	Cacna1c (-188)
H630	Heart	chr8	109523045	109523345	Vps4a (-32031)
H631	Heart	chr9	119388465	119388765	Exog (+34574)
H632	Heart	chr1	60919845	60920145	Ctla4 (-45874)
H633	Heart	chr1	92740405	92740705	Col6a3 (-32147)
H634	Heart	chr10	13768345	13768645	Hivep2 (+82310)
H635	Heart	chr10	67223225	67223525	Zfp365 (+152035)
H636	Heart	chr10	77549405	77549705	Icosl (+17442)
H637	Heart	chr10	83358465	83358765	1500009L16Rik (+173005)
H638	Heart	chr11	9327465	9327765	Abca13 (+235670)
H639	Heart	chr11	44762205	44762505	Ebf1 (+330719)
H640	Heart	chr11	81875785	81876085	Ccl11 (+4601)
H641	Heart	chr11	120112445	120112745	Bahcc1 (+18334)
H642	Heart	chr12	8451825	8452125	Rhob (+54816)
H643	Heart	chr12	103824845	103825145	Chga (+31816)
H644	Heart	chr13	99424265	99424565	Tmem174 (-17050)
H645	Heart	chr13	120128665	120128965	Nnt (+69130)
H646	Heart	chr16	33582665	33582965	Slc12a8 (+64400)
H647	Heart	chr17	82243185	82243485	Slc8a1 (-105618)
H648	Heart	chr18	24059165	24059465	Zfp397 (-53874)
H649	Heart	chr2	31625085	31625385	Abl1 (+9770)
H650	Heart	chr2	59365085	59365385	Dapl1 (+42525)
H651	Heart	chr2	168482145	168482445	Nfatc2 (-66447)
H652	Heart	chr3	75500665	75500965	Serpini1 (+139360)
H653	Heart	chr3	107631425	107631725	Eps8l3 (-48573)
H654	Heart	chr4	58588725	58589025	Lpar1 (-22710)
H655	Heart	chr5	31947285	31947585	Mrpl33 (+31111)
H656	Heart	chr5	150191565	150191865	6330406I15Rik (-22666)
H657	Heart	chr6	35312665	35312965	Fam180a (-36674)
H658	Heart	chr7	37382025	37382325	Tshz3 (-100962)
H659	Heart	chr7	125964825	125965125	Iqck (-34314)
H660	Heart	chr9	65096165	65096465	Cilp (-16672)
H661	Heart	chr9	105737985	105738285	Col6a6 (-7720)
H662	Heart	chr1	22060185	22060485	Kcnq5 (-108312)
H663	Heart	chr1	40886285	40886585	Tmem182 (+23989)
H664	Heart	chr1	45369765	45370065	Col3a1 (+1532)
H665	Heart	chr1	137487385	137487685	Nav1 (-5603)
H666	Heart	chr10	7008665	7008965	Ppp1r14c (-28424)
H667	Heart	chr10	53057385	53057685	Pln (+43)
H668	Heart	chr10	60277185	60277485	Unc5b (+16994)
H669	Heart	chr10	74997725	74998025	Snrpd3 (+17088)
H670	Heart	chr11	31506405	31506705	Bod1 (+65307)
H671	Heart	chr12	8452125	8452425	Rhob (+54516)
H672	Heart	chr13	12221465	12221765	Ryr2 (-22403)
H673	Heart	chr14	12520125	12520425	Ptprg (+134208)
H674	Heart	chr15	12357725	12358025	Golph3 (+106624)
H675	Heart	chr15	76868485	76868785	Apol6 (-7071)
H676	Heart	chr16	87268205	87268505	N6amt1 (-86075)
H677	Heart	chr17	15599165	15599465	Psmb1 (+35925)
H678	Heart	chr17	34700845	34701145	Notch4 (-245)
H679	Heart	chr17	73575305	73575605	Lclat1 (+118130)
H680	Heart	chr18	50158465	50158765	Tnfaip8 (-54321)
H681	Heart	chr19	40406465	40406765	Pdlim1 (-60509)
H682	Heart	chr19	53200265	53200565	Add3 (-18072)
H683	Heart	chr19	55262025	55262325	Tectb (+6800)
H684	Heart	chr19	56453065	56453365	Nrap (+11310)
H685	Heart	chr2	16656065	16656365	Plxdc2 (+378266)
H686	Heart	chr2	46298085	46298385	NONE
H687	Heart	chr2	59239045	59239345	Dapl1 (-83515)
H688	Heart	chr2	75268285	75268585	Hnrnpa3 (-228881)
H689	Heart	chr2	113879905	113880205	Actc1 (-1508)
H690	Heart	chr2	124510185	124510485	Sema6d (+74303)
H691	Heart	chr3	127228405	127228705	Larp7 (+27712)
H692	Heart	chr3	145535745	145536045	Bcl10 (-51447)
H693	Heart	chr4	53119645	53119945	Abca1 (+52972)
H694	Heart	chr4	114268085	114268385	Gm12824 (+188906)
H695	Heart	chr5	104557785	104558085	Sparcl1 (-14828)
H696	Heart	chr5	111919645	111919945	Mn1 (+72609)
H697	Heart	chr6	15693345	15693645	Mdfic (+22834)
H698	Heart	chr6	117387805	117388105	Cxcl12 (+269402)
H699	Heart	chr9	78598205	78598505	Cd109 (+135002)
H700	Heart	chr1	77045625	77045925	Epha4 (+465888)
H701	Heart	chr1	120255705	120256005	Clasp1 (-29780)
H702	Heart	chr11	32998545	32998845	Fgf18 (+48705)
H703	Heart	chr11	90188185	90188485	Hlf (+63896)
H704	Heart	chr12	109546845	109547145	Hhipl1 (+2515)
H705	Heart	chr13	17029325	17029625	5033411D12Rik (+757124)
H706	Heart	chr13	42047905	42048205	Hivep1 (-99335)
H707	Heart	chr14	26179305	26179605	Zmiz1 (-99323)
H708	Heart	chr14	70610165	70610465	Sorbs3 (-2837)
H709	Heart	chr15	73336505	73336805	Dennd3 (-6335)
H710	Heart	chr15	73560565	73560865	Ptp4a3 (+7140)
H711	Heart	chr16	4500665	4500965	Srl (+22238)
H712	Heart	chr17	31521865	31522165	Pde9a (-1164)
H713	Heart	chr17	45952905	45953205	1600014C23Rik (-82262)
H714	Heart	chr17	84509745	84510045	Zfp36l2 (+77392)
H715	Heart	chr18	9732065	9732365	Colec12 (+24569)
H716	Heart	chr18	44470945	44471245	Myot (-22633)
H717	Heart	chr19	30047925	30048225	Trpd52l3 (-30205)
H718	Heart	chr19	41229205	41229505	Tll2 (+51909)
H719	Heart	chr2	50798765	50799065	Rnd3 (+205716)
H720	Heart	chr3	97673745	97674045	Pde4dip (+18735)
H721	Heart	chr4	6606585	6606885	Nsmaf (-225317)
H722	Heart	chr4	135209265	135209565	Il28ra (-32957)
H723	Heart	chr5	75167265	75167565	Lnx1 (-68487)
H724	Heart	chr5	107580445	107580745	Tgfbr3 (+138019)
H725	Heart	chr7	17491125	17491425	Ptgir (-564)
H726	Heart	chr7	51728645	51728945	Josd2 (+5369)
H727	Heart	chr7	139819185	139819485	Lhpp (+17009)
H728	Heart	chr9	22750125	22750425	Bmper (-277245)
H729	Heart	chr9	71437645	71437945	Gcom1 (+2372)
H730	Heart	chr9	119541265	119541565	Scn5a (-53281)
H731	Heart	chr1	75356685	75356985	Des (-84)
H732	Heart	chr1	79914365	79914665	Serpine2 (-59275)
H733	Heart	chr1	80214865	80215165	Fam124b (-4496)
H734	Heart	chr1	137052885	137053185	Arl8a (+9624)
H735	Heart	chr1	153808405	153808705	1700025G04Rik (+128895)
H736	Heart	chr10	39187165	39187465	Fyn (+97710)
H737	Heart	chr11	6190185	6190485	Ogdh (-1265)
H738	Heart	chr11	63904725	63905025	Cox10 (-11901)
H739	Heart	chr12	112225345	112225645	Ankrd9 (-8264)
H740	Heart	chr14	48252165	48252465	Ktn1 (-31116)
H741	Heart	chr16	89991905	89992205	Tiam1 (-17111)
H742	Heart	chr17	28639165	28639465	Fkbp5 (-16258)
H743	Heart	chr18	75077285	75077585	Lipg (+43482)
H744	Heart	chr2	31203985	31204285	Hmcn2 (-89447)
H745	Heart	chr2	68216405	68216705	Stk39 (+93483)
H746	Heart	chr2	167096745	167097045	Ptgis (-30858)
H747	Heart	chr3	27541325	27541625	Fndc3b (+67886)
H748	Heart	chr4	6635745	6636045	Nsmaf (-254477)
H749	Heart	chr4	58630165	58630465	Lpar1 (-64150)
H750	Heart	chr4	81558665	81558965	Mpdz (-470106)
H751	Heart	chr4	140186545	140186845	Arhgef10l (+17976)
H752	Heart	chr5	20789525	20789825	Fgl2 (-88816)
H753	Heart	chr5	72826345	72826645	Corin (+68952)
H754	Heart	chr5	122287565	122287865	Sh2b3 (-905)
H755	Heart	chr5	124111565	124111865	Clip1 (+22585)
H756	Heart	chr6	29384305	29384605	Flnc (+1302)
H757	Heart	chr6	82701825	82702125	Hk2 (+22473)
H758	Heart	chr6	118273105	118273405	Bms1 (+96180)
H759	Heart	chr8	90328325	90328625	Zfp423 (+155019)
H760	Heart	chr8	104474545	104474845	Cdh11 (+834316)
H761	Heart	chr8	109358845	109359145	Has3 (-35147)
H762	Heart	chr1	38378765	38379065	Rev1 (-192408)
H763	Heart	chr1	169005905	169006205	Fam78b (+74507)
H764	Heart	chr1	187960565	187960865	Lyplal1 (-19526)
H765	Heart	chr10	70277405	70277705	Phyhipl (-215516)
H766	Heart	chr11	6182965	6183265	Tmed4 (-8275)
H767	Heart	chr11	19501565	19501865	Spred2 (-322730)
H768	Heart	chr11	56813025	56813325	Gria1 (-12018)
H769	Heart	chr12	77619885	77620185	Plekhg3 (-14512)
H770	Heart	chr13	71807365	71807665	Irx1 (+293656)
H771	Heart	chr14	79519185	79519485	Zfp957 (+127839)
H772	Heart	chr14	80090065	80090365	Lect1 (-28238)
H773	Heart	chr15	95599125	95599425	Ano6 (-21999)
H774	Heart	chr16	18746765	18747065	Cldn5 (-30025)
H775	Heart	chr16	19969645	19969945	Klhl6 (+13327)
H776	Heart	chr17	31522245	31522545	Pde9a (-784)
H777	Heart	chr18	69826365	69826665	Ccdc68 (-258698)
H778	Heart	chr19	41234925	41235225	Tll2 (+46189)
H779	Heart	chr2	148323685	148323985	Cd93 (-54564)
H780	Heart	chr2	180119945	180120245	Gata5 (-50711)
H781	Heart	chr4	126935825	126936125	BC003266 (+14947)
H782	Heart	chr4	150471205	150471505	Vamp3 (-39293)
H783	Heart	chr5	74700845	74701145	Rasl11b (+109644)
H784	Heart	chr5	104557225	104557525	Sparcl1 (-14268)
H785	Heart	chr6	51113345	51113645	Nfe2l3 (-269174)
H786	Heart	chr6	91478225	91478525	Lsm3 (+12346)
H787	Heart	chr6	135348885	135349185	Emp1 (+36086)
H788	Heart	chr7	74176245	74176545	Lysmd4 (-191035)
H789	Heart	chr7	106294405	106294705	Uvrag (-4901)
H790	Heart	chr9	61275765	61276065	Tle3 (+55742)
H791	Heart	chr9	110858425	110858725	Lrrc2 (+4526)
H792	Heart	chr1	84446465	84446765	Pid1 (-165395)
H793	Heart	chr10	111250905	111251205	Krr1 (-158696)
H794	Heart	chr11	98917425	98917725	Igfbp4 (+15001)
H795	Heart	chr11	114576905	114577205	Dnaic2 (-11671)
H796	Heart	chr12	86526785	86527085	Pgf (-8700)
H797	Heart	chr12	114376065	114376365	Crip2 (-2232)
H798	Heart	chr13	44255185	44255485	Cd83 (+374859)
H799	Heart	chr13	44424565	44424865	Jarid2 (-401557)
H800	Heart	chr13	60529025	60529325	Dapk1 (-174133)
H801	Heart	chr14	26528365	26528665	Ppif (+14859)
H802	Heart	chr15	58032805	58033105	Fbxo32 (+13478)
H803	Heart	chr15	99300605	99300905	Bcdin3d (+4406)
H804	Heart	chr16	5169065	5169365	Sec14l5 (+22013)
H805	Heart	chr17	67520145	67520445	Ptprm (+183504)
H806	Heart	chr19	40452225	40452525	Pdlim1 (-106269)
H807	Heart	chr2	50661205	50661505	Rnd3 (+343276)
H808	Heart	chr2	84610705	84611005	Serping1 (+4731)
H809	Heart	chr2	180128045	180128345	Gata5 (-58811)
H810	Heart	chr3	20691525	20691825	Agtr1b (-425576)
H811	Heart	chr4	141682885	141683185	Tmem51 (-42816)
H812	Heart	chr5	19912465	19912765	Phtf2 (+475327)
H813	Heart	chr5	107579985	107580285	Tgfbr3 (+138479)
H814	Heart	chr6	120594425	120594725	Cecr2 (-21864)
H815	Heart	chr9	110303225	110303525	Ptpn23 (+7339)
H816	Heart	chr9	120128625	120128925	Mobp (+69915)
H817	Heart	chr1	4534125	4534425	Sox17 (-47781)
H818	Heart	chr1	73408845	73409145	Tnp1 (-346522)
H819	Heart	chr10	87129505	87129805	Pah (+145115)
H820	Heart	chr10	90415885	90416185	Apaf1 (+129453)
H821	Heart	chr10	90493945	90494245	Apaf1 (+51393)
H822	Heart	chr10	90906145	90906445	Tmpo (-271968)
H823	Heart	chr11	31502825	31503125	Bod1 (+68887)
H824	Heart	chr11	101091305	101091605	Ezh1 (-3691)
H825	Heart	chr11	116956025	116956325	Sec14l1 (-20311)
H826	Heart	chr12	88033985	88034285	Vash1 (+14485)
H827	Heart	chr13	102784905	102785205	Pik3r1 (-246883)
H828	Heart	chr15	11676505	11676805	Npr3 (+158774)
H829	Heart	chr15	68243745	68244045	Zfat (-153477)
H830	Heart	chr15	68709245	68709545	Khdrbs3 (-49455)
H831	Heart	chr16	33595365	33595665	Slc12a8 (+77100)
H832	Heart	chr16	86127685	86127985	Adamts5 (-226465)
H833	Heart	chr17	13680845	13681145	Gm9880 (+133557)
H834	Heart	chr17	28104985	28105285	Anks1 (+58850)
H835	Heart	chr18	66327145	66327445	Ccbe1 (+124197)
H836	Heart	chr2	44840645	44840945	Gtdc1 (-123653)
H837	Heart	chr2	173257765	173258065	1700021F07Rik (-90178)
H838	Heart	chr3	53439925	53440225	Frem2 (+21202)
H839	Heart	chr3	78703825	78704125	Rapgef2 (+245822)
H840	Heart	chr3	100874905	100875205	Ptgfrn (+39034)
H841	Heart	chr5	53934685	53934985	Rbpj (-46619)
H842	Heart	chr5	107611765	107612065	Tgfbr3 (+106699)
H843	Heart	chr5	148391325	148391625	Flt1 (+146089)
H844	Heart	chr6	53168805	53169105	Jazf1 (-150337)
H845	Heart	chr6	82994825	82995125	Htra2 (+9590)
H846	Heart	chr6	97391365	97391665	Frmd4b (+176136)
H847	Heart	chr7	17201005	17201305	Grlf1 (-813)
H848	Heart	chr7	91162185	91162485	9930013L23Rik (+72680)
H849	Heart	chr7	108150805	108151105	P2ry2 (+9550)
H850	Heart	chr7	140939085	140939385	Dhx32 (+29251)
H851	Heart	chr8	26367225	26367525	Tacc1 (-55454)
H852	Heart	chr8	47312005	47312305	Slc25a4 (-15792)
H853	Heart	chr8	77777985	77778285	Rasd2 (+40292)
H854	Heart	chr9	32483725	32484025	Ets1 (-19752)
H855	Heart	chr9	44749905	44750205	Atp5l (-21230)
H856	Heart	chr9	58150885	58151185	Loxl1 (+9984)
H857	Heart	chr9	116317305	116317605	Tgfbr2 (-232974)
H858	Heart	chr9	119379165	119379465	Exog (+25274)
H859	Heart	chr1	133585085	133585385	5430435G22Rik (-37)
H860	Heart	chr10	3610165	3610465	Oprm1 (-52344)
H861	Heart	chr10	38525905	38526205	Lama4 (-159266)
H862	Heart	chr11	108827065	108827365	Axin2 (+45552)
H863	Heart	chr11	109554065	109554365	Fam20a (+29355)
H864	Heart	chr11	117284785	117285085	Sept9 (+223960)
H865	Heart	chr12	9927245	9927545	Osr1 (+346147)
H866	Heart	chr12	33445965	33446265	Nampt (-59085)
H867	Heart	chr12	86500625	86500925	Rps6kl1 (-8561)
H868	Heart	chr13	103805265	103805565	Mast4 (+319157)
H869	Heart	chr14	52534745	52535045	Ndrg2 (-1732)
H870	Heart	chr14	58564725	58565025	Efha1 (+53224)
H871	Heart	chr15	4697705	4698005	C6 (+20645)
H872	Heart	chr15	42599965	42600265	Angpt1 (-91774)
H873	Heart	chr15	76031025	76031325	Plec (+5576)
H874	Heart	chr16	25238445	25238745	Tprg (-48308)
H875	Heart	chr16	35130325	35130625	Adcy5 (-25247)
H876	Heart	chr17	67622365	67622665	Ptprm (+81284)
H877	Heart	chr17	84292545	84292845	Haao (-46565)
H878	Heart	chr19	57340945	57341245	Ablim1 (-50573)
H879	Heart	chr2	51144225	51144525	Rnd3 (-139744)
H880	Heart	chr2	165954305	165954605	Sulf2 (+26701)
H881	Heart	chr3	37709745	37710045	Gm5148 (-86613)
H882	Heart	chr3	101084825	101085125	Cd2 (+6887)
H883	Heart	chr3	101899425	101899725	Casq2 (+9142)
H884	Heart	chr3	107507025	107507325	Ahcyl1 (-7709)
H885	Heart	chr3	151514345	151514645	Ptgfr (-14003)
H886	Heart	chr4	104943925	104944225	Ppap2b (+114123)
H887	Heart	chr5	30879705	30880005	Kcnk3 (-10688)
H888	Heart	chr5	103020485	103020785	Arhgap24 (+110225)
H889	Heart	chr5	124654465	124654765	Pitpnm2 (+11811)
H890	Heart	chr5	131993605	131993905	Auts2 (-42712)
H891	Heart	chr6	51053305	51053605	Nfe2l3 (-329214)
H892	Heart	chr6	94571105	94571405	Lrig1 (+78884)
H893	Heart	chr8	107133125	107133425	Cdh16 (+14886)
H894	Heart	chr8	129307965	129308265	Tomm20 (+161615)
H895	Heart	chrX	130138905	130139205	Pcdh19 (+84477)
H896	Heart	chr1	161820665	161820965	4930523C07Rik (-153696)
H897	Heart	chr1	187474805	187475105	Slc30a10 (+196228)
H898	Heart	chr10	6950925	6951225	Ppp1r14c (+29316)
H899	Heart	chr10	42754705	42755005	Sobp (+139481)
H900	Heart	chr10	70277665	70277965	Phyhipl (-215776)
H901	Heart	chr11	45883125	45883425	Adam19 (+13786)
H902	Heart	chr11	103037485	103037785	Fmnl1 (+5183)
H903	Heart	chr13	16808985	16809285	Inhba (+702851)
H904	Heart	chr14	23779465	23779765	1700112E06Rik (+940681)
H905	Heart	chr14	63937085	63937385	Gata4 (-73138)
H906	Heart	chr14	73265385	73265685	Fndc3a (-155725)
H907	Heart	chr15	5188585	5188885	Ptger4 (+5096)
H908	Heart	chr15	36048165	36048465	Rgs22 (+21840)
H909	Heart	chr15	69133545	69133845	Khdrbs3 (+374845)
H910	Heart	chr15	97979545	97979845	Asb8 (-3562)
H911	Heart	chr15	101126605	101126905	9430023L20Rik (+12023)
H912	Heart	chr16	29745625	29745925	Opa1 (+166355)
H913	Heart	chr2	137261945	137262245	Jag1 (-320028)
H914	Heart	chr3	19576725	19577025	Crh (+18521)
H915	Heart	chr3	37503985	37504285	Spry1 (-34737)
H916	Heart	chr3	115888185	115888485	Vcam1 (-55729)
H917	Heart	chr3	122737745	122738045	Myoz2 (+10)
H918	Heart	chr4	47246405	47246705	Col15a1 (+25671)
H919	Heart	chr4	108882885	108883185	Osbpl9 (-8158)
H920	Heart	chr4	119963765	119964065	Foxo6 (-4049)
H921	Heart	chr4	132781965	132782265	Cd164l2 (+5391)
H922	Heart	chr4	147884765	147885065	Angptl7 (-10344)
H923	Heart	chr5	70055265	70055565	Gnpda2 (-71891)
H924	Heart	chr5	122971105	122971405	Atp2a2 (-19021)
H925	Heart	chr6	86726045	86726345	Anxa4 (+17383)
H926	Heart	chr6	91556665	91556965	Slc6a6 (-77246)
H927	Heart	chr7	100130405	100130705	Fam181b (-97834)
H928	Heart	chr7	117842345	117842645	Adm (+71312)
H929	Heart	chr7	122610325	122610625	Sox6 (+528125)
H930	Heart	chr9	9192765	9193065	Arhgap42 (+46098)
H931	Heart	chr9	22875485	22875785	Bmper (-151885)
H932	Heart	chr9	118646625	118646925	Itga9 (+130948)
H933	Heart	chr1	37559205	37559505	Mgat4a (+33894)
H934	Heart	chr1	37689305	37689605	2010300C02Rik (+87201)
H935	Heart	chr1	40726865	40727165	Slc9a2 (-11542)
H936	Heart	chr1	116678505	116678805	Cntnap5a (-903059)
H937	Heart	chr1	186295265	186295565	Hlx (+260957)
H938	Heart	chr10	5570625	5570925	Esr1 (+163720)
H939	Heart	chr10	67165565	67165865	Ado (-154012)
H940	Heart	chr10	76157645	76157945	Col6a1 (+30994)
H941	Heart	chr10	91933865	91934165	Nedd1 (+251148)
H942	Heart	chr11	107922865	107923165	Cacng5 (-150339)
H943	Heart	chr12	30720225	30720525	Tpo (+97099)
H944	Heart	chr12	77654965	77655265	Plekhg3 (+20568)
H945	Heart	chr12	81605825	81606125	Galntl1 (-14002)
H946	Heart	chr12	104600585	104600885	Asb2 (-6524)
H947	Heart	chr13	15390285	15390585	Gli3 (-165121)
H948	Heart	chr13	32772045	32772345	Mylk4 (+101453)
H949	Heart	chr13	54275865	54276165	Hrh2 (-11483)
H950	Heart	chr13	59600825	59601125	Agtpbp1 (+57705)
H951	Heart	chr13	104060965	104061265	Mast4 (+63457)
H952	Heart	chr14	35357705	35358005	9230112D13Rik (-21868)
H953	Heart	chr14	103867945	103868245	Scel (-44463)
H954	Heart	chr17	16011445	16011745	Rgmb (-48045)
H955	Heart	chr19	23001285	23001585	Klf9 (-214281)
H956	Heart	chr2	103417965	103418265	Abtb2 (+11648)
H957	Heart	chr2	121377045	121377345	Wdr76 (+44736)
H958	Heart	chr2	127562445	127562745	Mall (-6962)
H959	Heart	chr2	159533925	159534225	Gm826 (+619155)
H960	Heart	chr2	163186645	163186945	Jph2 (+36891)
H961	Heart	chr2	163212645	163212945	Jph2 (+10891)
H962	Heart	chr2	180041605	180041905	BC066135 (-17171)
H963	Heart	chr3	30143525	30143825	Mecom (-247005)
H964	Heart	chr4	47651785	47652085	Sec61b (+164402)
H965	Heart	chr4	55674945	55675245	Klf4 (-129748)
H966	Heart	chr5	77572145	77572445	Hopx (-48003)
H967	Heart	chr5	93449205	93449505	Ankrd56 (+24693)
H968	Heart	chr5	131403745	131404045	Wbscr17 (+379497)
H969	Heart	chr6	91137965	91138265	Fbln2 (-24643)
H970	Heart	chr6	91671245	91671545	Slc6a6 (+37334)
H971	Heart	chr7	37095205	37095505	Tshz3 (-387782)
H972	Heart	chr7	37448545	37448845	Tshz3 (-34442)
H973	Heart	chr7	74899505	74899805	Synm (+4973)
H974	Heart	chr7	90713445	90713745	Tmc3 (-19846)
H975	Heart	chr7	104640965	104641265	Ints4 (+11649)
H976	Heart	chr8	11292645	11292945	Col4a1 (+20031)
H977	Heart	chr8	15062645	15062945	Myom2 (+5142)
H978	Heart	chr9	24703725	24704025	Tbx20 (-125129)
H979	Heart	chr9	35101065	35101365	Rpusd4 (+25749)
H980	Heart	chr9	41323265	41323565	Ubash3b (-357838)
H981	Heart	chr9	84632885	84633185	Fam46a (+587696)
H982	Heart	chr1	73223685	73223985	Tnp1 (-161362)
H983	Heart	chr1	74130985	74131285	Tns1 (+39886)
H984	Heart	chr1	75583405	75583705	Slc4a3 (+40714)
H985	Heart	chr1	145923205	145923505	Rgs2 (-72076)
H986	Heart	chr1	182403745	182404045	6330403A02Rik (+9740)
H987	Heart	chr1	194476125	194476425	Hhat (+121138)
H988	Heart	chr10	66334485	66334785	Reep3 (+224970)
H989	Heart	chr10	84043925	84044225	Tcp11l2 (+4383)
H990	Heart	chr10	97049905	97050205	Kera (-19784)
H991	Heart	chr10	116187185	116187485	Gm239 (+146600)
H992	Heart	chr11	94311265	94311565	Cacna1g (+24097)
H993	Heart	chr12	111326085	111326385	Dio3 (-191205)
H994	Heart	chr13	9426085	9426385	Dip2c (+150464)
H995	Heart	chr13	38492585	38492885	Bmp6 (+55150)
H996	Heart	chr13	44153725	44154025	Cd83 (+273399)
H997	Heart	chr15	85431205	85431505	Wnt7b (-22855)
H998	Heart	chr15	85926525	85926825	Gramd4 (+38538)
H999	Heart	chr15	101138985	101139285	9430023L20Rik (+24403)
[truncated: 2,001 more rows]
