# Supplementary material for: Massively parallel cis-regulatory analysis in the mammalian central nervous system
Source: HighWire-hosted journal article supplement (doi:10.1101/gr.193789.115), 2015-11-17
Supplement: SuppTable2_4000-DHS-motifs_v3.xlsx [file SuppTable2_4000-DHS-motifs_v3.xlsx]

## Sheet: Retina_DHS
Rank	Motif	Name	P-value	q-value (Benjamini)	# Target Sequences with Motif	% of Targets Sequences with Motif	# Background Sequences with Motif	% of Background Sequences with Motif
1		GSC(Homeobox)/FrogEmbryos-GSC-ChIP-Seq(DRA000576)/Homer	1e-262	0	592	0.6513	6885	0.146
2		Otx2(Homeobox)/EpiLC-Otx2-ChIP-Seq(GSE56098)/Homer	1e-241	0	497	0.5468	4813.5	0.1021
3		CRX(Homeobox)/Retina-Crx-ChIP-Seq(GSE20012)/Homer	1e-234	0	776	0.8537	15524	0.3292
4		Pitx1(Homeobox)/Chicken-Pitx1-ChIP-Seq(GSE38910)/Homer	1e-106	0	792	0.8713	25024.2	0.5306
5		Phox2a(Homeobox)/Neuron-Phox2a-ChIP-Seq(GSE31456)/Homer	1e-56	0	150	0.165	1604.3	0.034
6		RORgt(NR)/EL4-RORgt.Flag-ChIP-Seq(GSE56019)/Homer	1e-28	0	68	0.0748	637.1	0.0135
7		Pax7(Paired,Homeobox),long/Myoblast-Pax7-ChIP-Seq(GSE25064)/Homer	1e-20	0	25	0.0275	85.1	0.0018
8		Mef2c(MADS)/GM12878-Mef2c-ChIP-Seq(GSE32465)/Homer	1e-19	0	100	0.11	1811.1	0.0384
9		Lhx3(Homeobox)/Neuron-Lhx3-ChIP-Seq(GSE31456)/Homer	1e-15	0	288	0.3168	9499.9	0.2014
10		Gata4(Zf)/Heart-Gata4-ChIP-Seq(GSE35151)/Homer	1e-13	0	207	0.2277	6390.8	0.1355
11		SCL(bHLH)/HPC7-Scl-ChIP-Seq(GSE13511)/Homer	1e-13	0	657	0.7228	28561.2	0.6056
12		Mef2a(MADS)/HL1-Mef2a.biotin-ChIP-Seq(GSE21529)/Homer	1e-12	0	88	0.0968	1925.7	0.0408
13		NeuroD1(bHLH)/Islet-NeuroD1-ChIP-Seq(GSE30298)/Homer	1e-10	0	172	0.1892	5392.1	0.1143
14		Nkx6.1(Homeobox)/Islet-Nkx6.1-ChIP-Seq(GSE40975)/Homer	1e-09	0	379	0.4169	14997.9	0.318
15		GATA3(Zf)/iTreg-Gata3-ChIP-Seq(GSE20898)/Homer	1e-08	0	254	0.2794	9400.8	0.1993
16		Atoh1(bHLH)/Cerebellum-Atoh1-ChIP-Seq(GSE22111)/Homer	1e-06	0	205	0.2255	7508.6	0.1592
17		Ascl1(bHLH)/NeuralTubes-Ascl1-ChIP-Seq(GSE55840)/Homer	1e-06	0	266	0.2926	10510.3	0.2229
18		THRa(NR)/C17.2-THRa-ChIP-Seq(GSE38347)/Homer	1e-06	0	86	0.0946	2571.6	0.0545
19		Lhx2(Homeobox)/HFSC-Lhx2-ChIP-Seq(GSE48068)/Homer	1e-05	0	171	0.1881	6240.6	0.1323
20		Olig2(bHLH)/Neuron-Olig2-ChIP-Seq(GSE30882)/Homer	1e-05	0.0001	302	0.3322	12509.1	0.2653
21		Foxh1(Forkhead)/hESC-FOXH1-ChIP-Seq(GSE29422)/Homer	1e-05	0.0001	93	0.1023	3009.2	0.0638
22		Ptf1a(bHLH)/Panc1-Ptf1a-ChIP-Seq(GSE47459)/Homer	0.0001	0.0002	393	0.4323	17198	0.3647
23		TATA-Box(TBP)/Promoter/Homer	0.0001	0.0003	200	0.22	7897	0.1675
24		Esrrb(NR)/mES-Esrrb-ChIP-Seq(GSE11431)/Homer	0.0001	0.0005	113	0.1243	4019.4	0.0852
25		Isl1(Homeobox)/Neuron-Isl1-ChIP-Seq(GSE31456)/Homer	0.0001	0.0007	293	0.3223	12491.7	0.2649
26		Foxo1(Forkhead)/RAW-Foxo1-ChIP-Seq(Fan et al.)/Homer	0.0001	0.0007	261	0.2871	10950.7	0.2322
27		Nanog(Homeobox)/mES-Nanog-ChIP-Seq(GSE11724)/Homer	0.0001	0.0008	534	0.5875	24752.5	0.5249
28		MafA(bZIP)/Islet-MafA-ChIP-Seq(GSE30298)/Homer	0.001	0.0012	141	0.1551	5386.8	0.1142
29		Maz(Zf)/HepG2-Maz-ChIP-Seq(GSE31477)/Homer	0.001	0.0023	219	0.2409	9132	0.1936
30		E2A(bHLH)/proBcell-E2A-ChIP-Seq(GSE21978)/Homer	0.001	0.0034	228	0.2508	9633.8	0.2043
31		Erra(NR)/HepG2-Erra-ChIP-Seq(GSE31477)/Homer	0.001	0.0046	310	0.341	13702.6	0.2906
32		Eomes(T-box)/H9-Eomes-ChIP-Seq(GSE26097)/Homer	0.001	0.0049	288	0.3168	12634.9	0.2679
33		MafK(bZIP)/C2C12-MafK-ChIP-Seq(GSE36030)/Homer	0.001	0.0059	45	0.0495	1396.5	0.0296
34		Pdx1(Homeobox)/Islet-Pdx1-ChIP-Seq(SRA008281)/Homer	0.01	0.0082	130	0.143	5163	0.1095
35		Atf7(bZIP)/3T3L1-Atf7-ChIP-Seq(GSE56872)/Homer	0.01	0.0097	67	0.0737	2362.9	0.0501
36		Pbx3(Homeobox)/GM12878-PBX3-ChIP-Seq(GSE32465)/Homer	0.01	0.01	51	0.0561	1689.1	0.0358
37		Atf1(bZIP)/K562-ATF1-ChIP-Seq(GSE31477)/Homer	0.01	0.0115	90	0.099	3398.8	0.0721
38		CHR(?)/Hela-CellCycle-Expression/Homer	0.01	0.0127	74	0.0814	2702.1	0.0573
39		Gata1(Zf)/K562-GATA1-ChIP-Seq(GSE18829)/Homer	0.01	0.0127	99	0.1089	3819.6	0.081
40		Gfi1b(Zf)/HPC7-Gfi1b-ChIP-Seq(GSE22178)/Homer	0.01	0.0148	94	0.1034	3618.5	0.0767
41		Znf263(Zf)/K562-Znf263-ChIP-Seq(GSE31477)/Homer	0.01	0.0182	281	0.3091	12611.5	0.2674
42		Tbx5(T-box)/HL1-Tbx5.biotin-ChIP-Seq(GSE21529)/Homer	0.01	0.021	424	0.4664	19868.2	0.4213
43		Atf2(bZIP)/3T3L1-Atf2-ChIP-Seq(GSE56872)/Homer	0.01	0.0269	47	0.0517	1621.9	0.0344
44		FOXP1(Forkhead)/H9-FOXP1-ChIP-Seq(GSE31006)/Homer	0.01	0.03	59	0.0649	2152.7	0.0456
45		Reverb(NR),DR2/RAW-Reverba.biotin-ChIP-Seq(GSE45914)/Homer	0.01	0.0303	28	0.0308	850.5	0.018
46		Fra1(bZIP)/BT549-Fra1-ChIP-Seq(GSE46166)/Homer	0.01	0.0303	72	0.0792	2734.1	0.058
47		Oct4(POU,Homeobox)/mES-Oct4-ChIP-Seq(GSE11431)/Homer	0.01	0.0303	56	0.0616	2027.6	0.043
48		Tcf12(bHLH)/GM12878-Tcf12-ChIP-Seq(GSE32465)/Homer	0.01	0.0303	159	0.1749	6794.6	0.1441
49		Nkx2.5(Homeobox)/HL1-Nkx2.5.biotin-ChIP-Seq(GSE21529)/Homer	0.01	0.0323	307	0.3377	14085.6	0.2987
50		E2A(bHLH),near_PU.1/Bcell-PU.1-ChIP-Seq(GSE21512)/Homer	0.01	0.037	207	0.2277	9168	0.1944
51		LXRE(NR),DR4/RAW-LXRb.biotin-ChIP-Seq(GSE21512)/Homer	0.01	0.0382	12	0.0132	271.3	0.0058
52		FXR(NR),IR1/Liver-FXR-ChIP-Seq(Chong et al.)/Homer	0.01	0.0382	66	0.0726	2507.4	0.0532
53		GATA3(Zf),DR4/iTreg-Gata3-ChIP-Seq(GSE20898)/Homer	0.01	0.0388	16	0.0176	415	0.0088
54		Meis1(Homeobox)/MastCells-Meis1-ChIP-Seq(GSE48085)/Homer	0.01	0.0409	246	0.2706	11127.8	0.236
55		c-Jun-CRE(bZIP)/K562-cJun-ChIP-Seq(GSE31477)/Homer	0.01	0.0428	43	0.0473	1516.5	0.0322
56		Ap4(bHLH)/AML-Tfap4-ChIP-Seq(GSE45738)/Homer	0.01	0.0438	192	0.2112	8496.2	0.1802

## Sheet: Brain_DHS
Rank	Motif	Name	P-value	q-value (Benjamini)	# Target Sequences with Motif	% of Targets Sequences with Motif	# Background Sequences with Motif	% of Background Sequences with Motif
1		NeuroD1(bHLH)/Islet-NeuroD1-ChIP-Seq(GSE30298)/Homer	1e-265	0	615	0.6508	7071.8	0.1502
2		Olig2(bHLH)/Neuron-Olig2-ChIP-Seq(GSE30882)/Homer	1e-233	0	780	0.8254	14669.1	0.3116
3		Atoh1(bHLH)/Cerebellum-Atoh1-ChIP-Seq(GSE22111)/Homer	1e-213	0	641	0.6783	9696.4	0.206
4		Ascl1(bHLH)/NeuralTubes-Ascl1-ChIP-Seq(GSE55840)/Homer	1e-103	0	591	0.6254	13440.6	0.2855
5		Ptf1a(bHLH)/Panc1-Ptf1a-ChIP-Seq(GSE47459)/Homer	1e-97	0	729	0.7714	20527.4	0.4361
6		NF1-halfsite(CTF)/LNCaP-NF1-ChIP-Seq(Unpublished)/Homer	1e-78	0	569	0.6021	14340.4	0.3047
7		SCL(bHLH)/HPC7-Scl-ChIP-Seq(GSE13511)/Homer	1e-56	0	852	0.9016	32174.5	0.6835
8		NF1(CTF)/LNCAP-NF1-ChIP-Seq(Unpublished)/Homer	1e-36	0	188	0.1989	3365.8	0.0715
9		Tlx?(NR)/NPC-H3K4me1-ChIP-Seq(GSE16256)/Homer	1e-26	0	188	0.1989	4076.3	0.0866
10		Fosl2(bZIP)/3T3L1-Fosl2-ChIP-Seq(GSE56872)/Homer	1e-23	0	106	0.1122	1722.9	0.0366
11		Jun-AP1(bZIP)/K562-cJun-ChIP-Seq(GSE31477)/Homer	1e-22	0	86	0.091	1192.2	0.0253
12		Fra1(bZIP)/BT549-Fra1-ChIP-Seq(GSE46166)/Homer	1e-22	0	135	0.1429	2619.5	0.0556
13		E2A(bHLH),near_PU.1/Bcell-PU.1-ChIP-Seq(GSE21512)/Homer	1e-21	0	354	0.3746	10980.9	0.2333
14		BATF(bZIP)/Th17-BATF-ChIP-Seq(GSE39756)/Homer	1e-21	0	149	0.1577	3128.5	0.0665
15		Atf3(bZIP)/GBM-ATF3-ChIP-Seq(GSE33912)/Homer	1e-20	0	149	0.1577	3192.8	0.0678
16		AP-1(bZIP)/ThioMac-PU.1-ChIP-Seq(GSE21512)/Homer	1e-19	0	164	0.1735	3841.2	0.0816
17		Mef2c(MADS)/GM12878-Mef2c-ChIP-Seq(GSE32465)/Homer	1e-18	0	81	0.0857	1249.2	0.0265
18		Nanog(Homeobox)/mES-Nanog-ChIP-Seq(GSE11724)/Homer	1e-18	0	630	0.6667	24598.7	0.5226
19		AR-halfsite(NR)/LNCaP-AR-ChIP-Seq(GSE27824)/Homer	1e-17	0	669	0.7079	26873.9	0.5709
20		Mef2a(MADS)/HL1-Mef2a.biotin-ChIP-Seq(GSE21529)/Homer	1e-16	0	85	0.0899	1484.1	0.0315
21		Unknown-ESC-element(?)/mES-Nanog-ChIP-Seq(GSE11724)/Homer	1e-14	0	186	0.1968	5162.3	0.1097
22		Tbx5(T-box)/HL1-Tbx5.biotin-ChIP-Seq(GSE21529)/Homer	1e-14	0	550	0.582	21430	0.4553
23		ERG(ETS)/VCaP-ERG-ChIP-Seq(GSE14097)/Homer	1e-10	0	316	0.3344	11279.9	0.2396
24		Bach2(bZIP)/OCILy7-Bach2-ChIP-Seq(GSE44420)/Homer	1e-10	0	59	0.0624	1117.7	0.0237
25		RBPJ:Ebox(?,bHLH)/Panc1-Rbpj1-ChIP-Seq(GSE47459)/Homer	1e-09	0	101	0.1069	2573.7	0.0547
26		Rfx1(HTH)/NPC-H3K4me1-ChIP-Seq(GSE16256)/Homer	1e-08	0	65	0.0688	1441	0.0306
27		Fli1(ETS)/CD8-FLI-ChIP-Seq(GSE20898)/Homer	1e-08	0	208	0.2201	7081.5	0.1504
28		Foxo1(Forkhead)/RAW-Foxo1-ChIP-Seq(Fan et al.)/Homer	1e-07	0	307	0.3249	11516.9	0.2447
29		E2A(bHLH)/proBcell-E2A-ChIP-Seq(GSE21978)/Homer	1e-07	0	318	0.3365	12098.5	0.257
30		ETS1(ETS)/Jurkat-ETS1-ChIP-Seq(GSE17954)/Homer	1e-07	0	202	0.2138	6991.9	0.1485
31		RFX(HTH)/K562-RFX3-ChIP-Seq(SRA012198)/Homer	1e-06	0	33	0.0349	580.6	0.0123
32		X-box(HTH)/NPC-H3K4me1-ChIP-Seq(GSE16256)/Homer	1e-06	0	39	0.0413	759.9	0.0161
33		EWS:ERG-fusion(ETS)/CADO_ES1-EWS:ERG-ChIP-Seq(SRA014231)/Homer	1e-06	0	135	0.1429	4374.9	0.0929
34		Rfx2(HTH)/LoVo-RFX2-ChIP-Seq(GSE49402)/Homer	1e-05	0	34	0.036	658.4	0.014
35		STAT4(Stat)/CD4-Stat4-ChIP-Seq(GSE22104)/Homer	1e-05	0	157	0.1661	5401.4	0.1147
36		MafA(bZIP)/Islet-MafA-ChIP-Seq(GSE30298)/Homer	1e-05	0	176	0.1862	6281.9	0.1335
37		ETV1(ETS)/GIST48-ETV1-ChIP-Seq(GSE22441)/Homer	1e-05	0.0001	244	0.2582	9393.9	0.1996
38		EWS:FLI1-fusion(ETS)/SK_N_MC-EWS:FLI1-ChIP-Seq(SRA014231)/Homer	1e-05	0.0001	116	0.1228	3840.2	0.0816
39		RORgt(NR)/EL4-RORgt.Flag-ChIP-Seq(GSE56019)/Homer	0.0001	0.0001	31	0.0328	657.5	0.014
40		NFAT(RHD)/Jurkat-NFATC1-ChIP-Seq(Jolma et al.)/Homer	0.0001	0.0001	133	0.1407	4628.2	0.0983
41		Egr2(Zf)/Thymocytes-Egr2-ChIP-Seq(GSE34254)/Homer	0.0001	0.0001	31	0.0328	667	0.0142
42		Znf263(Zf)/K562-Znf263-ChIP-Seq(GSE31477)/Homer	0.0001	0.0002	333	0.3524	13721.2	0.2915
43		Lhx2(Homeobox)/HFSC-Lhx2-ChIP-Seq(GSE48068)/Homer	0.001	0.0008	113	0.1196	3965.9	0.0843
44		PR(NR)/T47D-PR-ChIP-Seq(GSE31130)/Homer	0.001	0.0009	341	0.3608	14377.3	0.3054
45		ELF5(ETS)/T47D-ELF5-ChIP-Seq(GSE30407)/Homer	0.001	0.0009	126	0.1333	4545.2	0.0966
46		Meis1(Homeobox)/MastCells-Meis1-ChIP-Seq(GSE48085)/Homer	0.001	0.001	303	0.3206	12601.8	0.2677
47		EHF(ETS)/LoVo-EHF-ChIP-Seq(GSE49402)/Homer	0.001	0.0014	212	0.2243	8432.3	0.1791
48		GABPA(ETS)/Jurkat-GABPa-ChIP-Seq(GSE17954)/Homer	0.001	0.0016	158	0.1672	6021.5	0.1279
49		AMYB(HTH)/Testes-AMYB-ChIP-Seq(GSE44588)/Homer	0.001	0.0017	232	0.2455	9386.2	0.1994
50		Stat3+il21(Stat)/CD4-Stat3-ChIP-Seq(GSE19198)/Homer	0.001	0.0019	121	0.128	4427.1	0.0941
51		Pax8(Paired,Homeobox)/Thyroid-Pax8-ChIP-Seq(GSE26938)/Homer	0.001	0.0021	81	0.0857	2738.2	0.0582
52		Smad4(MAD)/ESC-SMAD4-ChIP-Seq(GSE29422)/Homer	0.001	0.0021	286	0.3026	11949.9	0.2539
53		TEAD4(TEA)/Tropoblast-Tead4-ChIP-Seq(GSE37350)/Homer	0.001	0.0022	143	0.1513	5412.7	0.115
54		NFY(CCAAT)/Promoter/Homer	0.001	0.0023	128	0.1354	4763	0.1012
55		Egr1(Zf)/K562-Egr1-ChIP-Seq(GSE32465)/Homer	0.001	0.0037	95	0.1005	3391.6	0.0721
56		Stat3(Stat)/mES-Stat3-ChIP-Seq(GSE11431)/Homer	0.001	0.0037	86	0.091	3013.6	0.064
57		Lhx3(Homeobox)/Neuron-Lhx3-ChIP-Seq(GSE31456)/Homer	0.001	0.0038	166	0.1757	6525.9	0.1386
58		Rfx5(HTH)/GM12878-Rfx5-ChIP-Seq(GSE31477)/Homer	0.01	0.0049	63	0.0667	2086.5	0.0443
59		ETS:E-box(ETS,bHLH)/HPC7-Scl-ChIP-Seq(GSE22178)/Homer	0.01	0.005	28	0.0296	730.2	0.0155
60		SPDEF(ETS)/VCaP-SPDEF-ChIP-Seq(SRA014231)/Homer	0.01	0.0053	183	0.1937	7358	0.1563
61		BMAL1(bHLH)/Liver-Bmal1-ChIP-Seq(GSE39860)/Homer	0.01	0.0055	275	0.291	11648	0.2475
62		TEAD(TEA)/Fibroblast-PU.1-ChIP-Seq(Unpublished)/Homer	0.01	0.0087	102	0.1079	3808.7	0.0809
63		Phox2a(Homeobox)/Neuron-Phox2a-ChIP-Seq(GSE31456)/Homer	0.01	0.0087	32	0.0339	910.3	0.0193
64		MYB(HTH)/ERMYB-Myb-ChIPSeq(GSE22095)/Homer	0.01	0.0106	238	0.2519	10044.1	0.2134
65		NPAS2(bHLH)/Liver-NPAS2-ChIP-Seq(GSE39860)/Homer	0.01	0.0119	176	0.1862	7187.9	0.1527
66		CRX(Homeobox)/Retina-Crx-ChIP-Seq(GSE20012)/Homer	0.01	0.0127	278	0.2942	11977.4	0.2545
67		n-Myc(bHLH)/mES-nMyc-ChIP-Seq(GSE11431)/Homer	0.01	0.0129	113	0.1196	4356.9	0.0926
68		Nkx6.1(Homeobox)/Islet-Nkx6.1-ChIP-Seq(GSE40975)/Homer	0.01	0.0135	258	0.273	11048.5	0.2347
69		GATA3(Zf),DR8/iTreg-Gata3-ChIP-Seq(GSE20898)/Homer	0.01	0.0141	15	0.0159	333.5	0.0071
70		Bcl6(Zf)/Liver-Bcl6-ChIP-Seq(GSE31578)/Homer	0.01	0.0143	211	0.2233	8857.3	0.1882
71		MafK(bZIP)/C2C12-MafK-ChIP-Seq(GSE36030)/Homer	0.01	0.0146	48	0.0508	1587	0.0337
72		c-Myc(bHLH)/mES-cMyc-ChIP-Seq(GSE11431)/Homer	0.01	0.0146	88	0.0931	3281.3	0.0697
73		SpiB(ETS)/OCILY3-SPIB-ChIP-Seq(GSE56857)/Homer	0.01	0.0158	40	0.0423	1273.9	0.0271
74		Arnt:Ahr(bHLH)/MCF7-Arnt-ChIP-Seq(Lo et al.)/Homer	0.01	0.0163	87	0.0921	3256.4	0.0692
75		E2F6(E2F)/Hela-E2F6-ChIP-Seq(GSE31477)/Homer	0.01	0.0187	55	0.0582	1904.8	0.0405
76		Atf7(bZIP)/3T3L1-Atf7-ChIP-Seq(GSE56872)/Homer	0.01	0.0227	70	0.0741	2563.8	0.0545
77		Elk4(ETS)/Hela-Elk4-ChIP-Seq(GSE31477)/Homer	0.01	0.0241	79	0.0836	2962.4	0.0629
78		NF-E2(bZIP)/K562-NFE2-ChIP-Seq(GSE31477)/Homer	0.01	0.0253	14	0.0148	327.9	0.007
79		BORIS(Zf)/K562-CTCFL-ChIP-Seq(GSE32465)/Homer	0.01	0.0272	34	0.036	1082	0.023
80		c-Jun-CRE(bZIP)/K562-cJun-ChIP-Seq(GSE31477)/Homer	0.01	0.0296	50	0.0529	1747.1	0.0371
81		Max(bHLH)/K562-Max-ChIP-Seq(GSE31477)/Homer	0.01	0.0297	107	0.1132	4240.7	0.0901

## Sheet: Heart_DHS
Rank	Motif	Name	P-value	q-value (Benjamini)	# Target Sequences with Motif	% of Targets Sequences with Motif	# Background Sequences with Motif	% of Background Sequences with Motif
1		Mef2c(MADS)/GM12878-Mef2c-ChIP-Seq(GSE32465)/Homer	1e-49	0	138	0.1427	1485.8	0.0307
2		Mef2a(MADS)/HL1-Mef2a.biotin-ChIP-Seq(GSE21529)/Homer	1e-45	0	139	0.1437	1630.2	0.0337
3		GRE(NR),IR3/RAW264.7-GRE-ChIP-Seq(Unpublished)/Homer	1e-40	0	129	0.1334	1566.7	0.0323
4		GRE(NR),IR3/A549-GR-ChIP-Seq(GSE32465)/Homer	1e-35	0	91	0.0941	890.7	0.0184
5		Fra1(bZIP)/BT549-Fra1-ChIP-Seq(GSE46166)/Homer	1e-33	0	170	0.1758	3000.4	0.0619
6		Ap4(bHLH)/AML-Tfap4-ChIP-Seq(GSE45738)/Homer	1e-32	0	356	0.3681	9714	0.2006
7		ARE(NR)/LNCAP-AR-ChIP-Seq(GSE27824)/Homer	1e-30	0	123	0.1272	1846.9	0.0381
8		Atf3(bZIP)/GBM-ATF3-ChIP-Seq(GSE33912)/Homer	1e-28	0	181	0.1872	3645.8	0.0753
9		BATF(bZIP)/Th17-BATF-ChIP-Seq(GSE39756)/Homer	1e-27	0	176	0.182	3585	0.074
10		Jun-AP1(bZIP)/K562-cJun-ChIP-Seq(GSE31477)/Homer	1e-27	0	98	0.1013	1313.3	0.0271
11		AP-1(bZIP)/ThioMac-PU.1-ChIP-Seq(GSE21512)/Homer	1e-25	0	192	0.1986	4281.1	0.0884
12		Fosl2(bZIP)/3T3L1-Fosl2-ChIP-Seq(GSE56872)/Homer	1e-25	0	117	0.121	1919.2	0.0396
13		MyoG(bHLH)/C2C12-MyoG-ChIP-Seq(GSE36024)/Homer	1e-24	0	301	0.3113	8419.6	0.1738
14		GATA3(Zf)/iTreg-Gata3-ChIP-Seq(GSE20898)/Homer	1e-24	0	288	0.2978	7925.8	0.1636
15		Gata4(Zf)/Heart-Gata4-ChIP-Seq(GSE35151)/Homer	1e-23	0	216	0.2234	5302.8	0.1095
16		Tcf12(bHLH)/GM12878-Tcf12-ChIP-Seq(GSE32465)/Homer	1e-23	0	283	0.2927	7861.9	0.1623
17		EBF(EBF)/proBcell-EBF-ChIP-Seq(GSE21978)/Homer	1e-22	0	103	0.1065	1684.6	0.0348
18		Myf5(bHLH)/GM-Myf5-ChIP-Seq(GSE24852)/Homer	1e-21	0	220	0.2275	5615	0.1159
19		Atf1(bZIP)/K562-ATF1-ChIP-Seq(GSE31477)/Homer	1e-21	0	161	0.1665	3528.6	0.0729
20		AR-halfsite(NR)/LNCaP-AR-ChIP-Seq(GSE27824)/Homer	1e-21	0	689	0.7125	27272.3	0.5631
21		MyoD(bHLH)/Myotube-MyoD-ChIP-Seq(GSE21614)/Homer	1e-21	0	233	0.241	6200.5	0.128
22		Gata1(Zf)/K562-GATA1-ChIP-Seq(GSE18829)/Homer	1e-20	0	147	0.152	3157.5	0.0652
23		Gata2(Zf)/K562-GATA2-ChIP-Seq(GSE18829)/Homer	1e-20	0	157	0.1624	3513.8	0.0725
24		c-Jun-CRE(bZIP)/K562-cJun-ChIP-Seq(GSE31477)/Homer	1e-20	0	101	0.1044	1744.1	0.036
25		Atf2(bZIP)/3T3L1-Atf2-ChIP-Seq(GSE56872)/Homer	1e-20	0	108	0.1117	1953	0.0403
26		Atf7(bZIP)/3T3L1-Atf7-ChIP-Seq(GSE56872)/Homer	1e-19	0	129	0.1334	2653.8	0.0548
27		EBF1(EBF)/Near-E2A-ChIP-Seq(GSE21512)/Homer	1e-18	0	283	0.2927	8480.6	0.1751
28		PR(NR)/T47D-PR-ChIP-Seq(GSE31130)/Homer	1e-18	0	435	0.4498	15161.9	0.313
29		Atoh1(bHLH)/Cerebellum-Atoh1-ChIP-Seq(GSE22111)/Homer	1e-18	0	287	0.2968	8690.8	0.1794
30		NF1-halfsite(CTF)/LNCaP-NF1-ChIP-Seq(Unpublished)/Homer	1e-18	0	389	0.4023	13098.7	0.2704
31		Atf4(bZIP)/MEF-Atf4-ChIP-Seq(GSE35681)/Homer	1e-17	0	73	0.0755	1121.8	0.0232
32		Usf2(bHLH)/C2C12-Usf2-ChIP-Seq(GSE36030)/Homer	1e-16	0	94	0.0972	1774.8	0.0366
33		CEBP(bZIP)/ThioMac-CEBPb-ChIP-Seq(GSE21512)/Homer	1e-16	0	128	0.1324	2880.7	0.0595
34		CEBP:AP1(bZIP)/ThioMac-CEBPb-ChIP-Seq(GSE21512)/Homer	1e-15	0	149	0.1541	3725.6	0.0769
35		NeuroD1(bHLH)/Islet-NeuroD1-ChIP-Seq(GSE30298)/Homer	1e-14	0	219	0.2265	6432.4	0.1328
36		NF1(CTF)/LNCAP-NF1-ChIP-Seq(Unpublished)/Homer	1e-14	0	127	0.1313	3033.7	0.0626
37		Tbx20(T-box)/Heart-Tbx20-ChIP-Seq(GSE29636)/Homer	1e-13	0	82	0.0848	1618.5	0.0334
38		Rbpj1(?)/Panc1-Rbpj1-ChIP-Seq(GSE47459)/Homer	1e-13	0	318	0.3289	10856.6	0.2242
39		Foxo1(Forkhead)/RAW-Foxo1-ChIP-Seq(Fan et al.)/Homer	1e-13	0	346	0.3578	12105.5	0.2499
40		Bach2(bZIP)/OCILy7-Bach2-ChIP-Seq(GSE44420)/Homer	1e-13	0	67	0.0693	1179.4	0.0244
41		Ascl1(bHLH)/NeuralTubes-Ascl1-ChIP-Seq(GSE55840)/Homer	1e-12	0	342	0.3537	11992.9	0.2476
42		BMAL1(bHLH)/Liver-Bmal1-ChIP-Seq(GSE39860)/Homer	1e-12	0	324	0.3351	11220.8	0.2317
43		Chop(bZIP)/MEF-Chop-ChIP-Seq(GSE35681)/Homer	1e-12	0	55	0.0569	875.1	0.0181
44		STAT5(Stat)/mCD4+-Stat5-ChIP-Seq(GSE12346)/Homer	1e-12	0	97	0.1003	2176.6	0.0449
45		MITF(bHLH)/MastCells-MITF-ChIP-Seq(GSE48085)/Homer	1e-12	0	205	0.212	6251	0.1291
46		Olig2(bHLH)/Neuron-Olig2-ChIP-Seq(GSE30882)/Homer	1e-11	0	387	0.4002	14225.8	0.2937
47		Ptf1a(bHLH)/Panc1-Ptf1a-ChIP-Seq(GSE47459)/Homer	1e-11	0	492	0.5088	19292.5	0.3983
48		TEAD4(TEA)/Tropoblast-Tead4-ChIP-Seq(GSE37350)/Homer	1e-11	0	179	0.1851	5375.8	0.111
49		USF1(bHLH)/GM12878-Usf1-ChIP-Seq(GSE32465)/Homer	1e-10	0	105	0.1086	2605.2	0.0538
50		JunD(bZIP)/K562-JunD-ChIP-Seq/Homer	1e-10	0	36	0.0372	473.2	0.0098
51		STAT4(Stat)/CD4-Stat4-ChIP-Seq(GSE22104)/Homer	1e-09	0	192	0.1986	6136.5	0.1267
52		STAT1(Stat)/HelaS3-STAT1-ChIP-Seq(GSE12782)/Homer	1e-09	0	76	0.0786	1718.4	0.0355
53		SCL(bHLH)/HPC7-Scl-ChIP-Seq(GSE13511)/Homer	1e-09	0	706	0.7301	30766.7	0.6352
54		CLOCK(bHLH)/Liver-Clock-ChIP-Seq(GSE39860)/Homer	1e-09	0	117	0.121	3180.4	0.0657
55		E2A(bHLH)/proBcell-E2A-ChIP-Seq(GSE21978)/Homer	1e-09	0	303	0.3133	10956.2	0.2262
56		Max(bHLH)/K562-Max-ChIP-Seq(GSE31477)/Homer	1e-09	0	139	0.1437	4042.6	0.0835
57		Stat3+il21(Stat)/CD4-Stat3-ChIP-Seq(GSE19198)/Homer	1e-09	0	158	0.1634	4833.2	0.0998
58		Stat3(Stat)/mES-Stat3-ChIP-Seq(GSE11431)/Homer	1e-08	0	121	0.1251	3444.4	0.0711
59		Tlx?(NR)/NPC-H3K4me1-ChIP-Seq(GSE16256)/Homer	1e-08	0	124	0.1282	3589.5	0.0741
60		NPAS2(bHLH)/Liver-NPAS2-ChIP-Seq(GSE39860)/Homer	1e-07	0	202	0.2089	6951.7	0.1435
61		Nrf2(bZIP)/Lymphoblast-Nrf2-ChIP-Seq(GSE37589)/Homer	1e-07	0	22	0.0228	258.7	0.0053
62		Bcl6(Zf)/Liver-Bcl6-ChIP-Seq(GSE31578)/Homer	1e-07	0	258	0.2668	9435.7	0.1948
63		TEAD(TEA)/Fibroblast-PU.1-ChIP-Seq(Unpublished)/Homer	1e-07	0	127	0.1313	3880.4	0.0801
64		Bach1(bZIP)/K562-Bach1-ChIP-Seq(GSE31477)/Homer	1e-06	0	21	0.0217	283.5	0.0059
65		NF-E2(bZIP)/K562-NFE2-ChIP-Seq(GSE31477)/Homer	1e-06	0	23	0.0238	334.1	0.0069
66		ZNF711(Zf)/SHSY5Y-ZNF711-ChIP-Seq(GSE20673)/Homer	1e-06	0	316	0.3268	12439.8	0.2568
67		THRa(NR)/C17.2-THRa-ChIP-Seq(GSE38347)/Homer	1e-05	0	96	0.0993	2937.1	0.0606
68		n-Myc(bHLH)/mES-nMyc-ChIP-Seq(GSE11431)/Homer	1e-05	0	125	0.1293	4152.5	0.0857
69		TEAD2(TEA)/Py2T-Tead2-ChIP-Seq(GSE55709)/Homer	1e-05	0	101	0.1044	3229.2	0.0667
70		KLF5(Zf)/LoVo-KLF5-ChIP-Seq(GSE49402)/Homer	1e-05	0	210	0.2172	7938.4	0.1639
71		MafA(bZIP)/Islet-MafA-ChIP-Seq(GSE30298)/Homer	0.0001	0	169	0.1748	6155.3	0.1271
72		NFAT(RHD)/Jurkat-NFATC1-ChIP-Seq(Jolma et al.)/Homer	0.0001	0.0001	147	0.152	5237.1	0.1081
73		NFAT:AP1(RHD,bZIP)/Jurkat-NFATC1-ChIP-Seq(Jolma et al.)/Homer	0.0001	0.0001	40	0.0414	964.8	0.0199
74		c-Myc(bHLH)/mES-cMyc-ChIP-Seq(GSE11431)/Homer	0.0001	0.0001	94	0.0972	3044.3	0.0629
75		Nr5a2(NR)/mES-Nr5a2-ChIP-Seq(GSE19019)/Homer	0.0001	0.0001	111	0.1148	3772	0.0779
76		Foxh1(Forkhead)/hESC-FOXH1-ChIP-Seq(GSE29422)/Homer	0.0001	0.0001	97	0.1003	3200.8	0.0661
77		CRE(bZIP)/Promoter/Homer	0.0001	0.0003	44	0.0455	1173.7	0.0242
78		EKLF(Zf)/Erythrocyte-Klf1-ChIP-Seq(GSE20478)/Homer	0.001	0.0005	51	0.0527	1476.9	0.0305
79		Smad4(MAD)/ESC-SMAD4-ChIP-Seq(GSE29422)/Homer	0.001	0.0009	291	0.3009	12165.9	0.2512
80		Egr1(Zf)/K562-Egr1-ChIP-Seq(GSE32465)/Homer	0.001	0.001	104	0.1075	3693.6	0.0763
81		Smad3(MAD)/NPC-Smad3-ChIP-Seq(GSE36673)/Homer	0.001	0.0011	478	0.4943	21279.3	0.4393
82		ZFX(Zf)/mES-Zfx-ChIP-Seq(GSE11431)/Homer	0.001	0.0011	235	0.243	9588.9	0.198
83		bHLHE40(bHLH)/HepG2-BHLHE40-ChIP-Seq(GSE31477)/Homer	0.001	0.0011	51	0.0527	1530.1	0.0316
84		Smad2(MAD)/ES-SMAD2-ChIP-Seq(GSE29422)/Homer	0.001	0.0019	283	0.2927	11939.3	0.2465
85		HRE(HSF)/Striatum-HSF1-ChIP-Seq(GSE38000)/Homer	0.001	0.0022	50	0.0517	1540.9	0.0318
86		Klf4(Zf)/mES-Klf4-ChIP-Seq(GSE11431)/Homer	0.001	0.0029	70	0.0724	2374.9	0.049
87		Esrrb(NR)/mES-Esrrb-ChIP-Seq(GSE11431)/Homer	0.01	0.0032	114	0.1179	4273.9	0.0882
88		c-Myc(bHLH)/LNCAP-cMyc-ChIP-Seq(Unpublished)/Homer	0.01	0.0033	63	0.0651	2098.1	0.0433
89		Nur77(NR)/K562-NR4A1-ChIP-Seq(GSE31363)/Homer	0.01	0.0036	34	0.0352	959.5	0.0198
90		Egr2(Zf)/Thymocytes-Egr2-ChIP-Seq(GSE34254)/Homer	0.01	0.0046	27	0.0279	715.4	0.0148
91		MafK(bZIP)/C2C12-MafK-ChIP-Seq(GSE36030)/Homer	0.01	0.0051	50	0.0517	1609.7	0.0332
92		Erra(NR)/HepG2-Erra-ChIP-Seq(GSE31477)/Homer	0.01	0.0065	348	0.3599	15328.3	0.3165
93		HRE(HSF)/HepG2-HSF1-ChIP-Seq(GSE31477)/Homer	0.01	0.0065	38	0.0393	1152.2	0.0238
94		AP-2gamma(AP2)/MCF7-TFAP2C-ChIP-Seq(GSE21234)/Homer	0.01	0.0074	182	0.1882	7482.7	0.1545
95		FOXP1(Forkhead)/H9-FOXP1-ChIP-Seq(GSE31006)/Homer	0.01	0.0089	57	0.0589	1949.7	0.0403
96		CArG(MADS)/PUER-Srf-ChIP-Seq(Sullivan et al.)/Homer	0.01	0.0091	51	0.0527	1704.6	0.0352
97		MYB(HTH)/ERMYB-Myb-ChIPSeq(GSE22095)/Homer	0.01	0.0095	247	0.2554	10581.5	0.2185
98		Six1(Homeobox)/Myoblast-Six1-ChIP-Chip(GSE20150)/Homer	0.01	0.0112	40	0.0414	1277	0.0264
99		FXR(NR),IR1/Liver-FXR-ChIP-Seq(Chong et al.)/Homer	0.01	0.0116	74	0.0765	2702.6	0.0558
100		Mouse_Recombination_Hotspot(Zf)/Testis-DMC1-ChIP-Seq(GSE24438)/Homer	0.01	0.0118	14	0.0145	309.3	0.0064
101		E-box(bHLH)/Promoter/Homer	0.01	0.012	16	0.0165	377.3	0.0078
102		Nr5a2(NR)/Pancreas-LRH1-ChIP-Seq(GSE34295)/Homer	0.01	0.0121	129	0.1334	5153	0.1064
103		PRDM9(Zf)/Testis-DMC1-ChIP-Seq(GSE35498)/Homer	0.01	0.0127	75	0.0776	2760.8	0.057
104		Nkx6.1(Homeobox)/Islet-Nkx6.1-ChIP-Seq(GSE40975)/Homer	0.01	0.0127	282	0.2916	12330.1	0.2546
105		Meis1(Homeobox)/MastCells-Meis1-ChIP-Seq(GSE48085)/Homer	0.01	0.0136	296	0.3061	13020.3	0.2688
106		LXRE(NR),DR4/RAW-LXRb.biotin-ChIP-Seq(GSE21512)/Homer	0.01	0.0136	12	0.0124	251.5	0.0052
107		CRX(Homeobox)/Retina-Crx-ChIP-Seq(GSE20012)/Homer	0.01	0.0152	299	0.3092	13197.4	0.2725
108		Pax7(Paired,Homeobox),long/Myoblast-Pax7-ChIP-Seq(GSE25064)/Homer	0.01	0.0187	5	0.0052	60.4	0.0012
109		Pitx1(Homeobox)/Chicken-Pitx1-ChIP-Seq(GSE38910)/Homer	0.01	0.0216	506	0.5233	23475.2	0.4847
110		Nkx3.1(Homeobox)/LNCaP-Nkx3.1-ChIP-Seq(GSE28264)/Homer	0.01	0.0222	321	0.332	14363.1	0.2965
111		Nkx2.1(Homeobox)/LungAC-Nkx2.1-ChIP-Seq(GSE43252)/Homer	0.01	0.0238	410	0.424	18738.2	0.3869

## Sheet: Liver_DHS
Rank	Motif	Name	P-value	q-value (Benjamini)	# Target Sequences with Motif	% of Targets Sequences with Motif	# Background Sequences with Motif	% of Background Sequences with Motif
1		HNF6(Homeobox)/Liver-Hnf6-ChIP-Seq(ERP000394)/Homer	1e-147	0	344	0.3768	3484.8	0.0735
2		HNF4a(NR),DR1/HepG2-HNF4a-ChIP-Seq(GSE25021)/Homer	1e-88	0	251	0.2749	2994.5	0.0632
3		Erra(NR)/HepG2-Erra-ChIP-Seq(GSE31477)/Homer	1e-83	0	532	0.5827	13074.8	0.2758
4		CEBP(bZIP)/ThioMac-CEBPb-ChIP-Seq(GSE21512)/Homer	1e-77	0	267	0.2924	3836.6	0.0809
5		Foxa2(Forkhead)/Liver-Foxa2-ChIP-Seq(GSE25694)/Homer	1e-74	0	320	0.3505	5549	0.117
6		RXR(NR),DR1/3T3L1-RXR-ChIP-Seq(GSE13511)/Homer	1e-72	0	345	0.3779	6516	0.1374
7		FOXA1(Forkhead)/LNCAP-FOXA1-ChIP-Seq(GSE27824)/Homer	1e-71	0	389	0.4261	8128.5	0.1714
8		FOXA1(Forkhead)/MCF7-FOXA1-ChIP-Seq(GSE26831)/Homer	1e-71	0	342	0.3746	6460.8	0.1363
9		Fox:Ebox(Forkhead,bHLH)/Panc1-Foxa2-ChIP-Seq(GSE47459)/Homer	1e-59	0	340	0.3724	7181.1	0.1515
10		PPARE(NR),DR1/3T3L1-Pparg-ChIP-Seq(GSE13511)/Homer	1e-57	0	295	0.3231	5684.9	0.1199
11		CEBP:AP1(bZIP)/ThioMac-CEBPb-ChIP-Seq(GSE21512)/Homer	1e-41	0	238	0.2607	4837.1	0.102
12		Esrrb(NR)/mES-Esrrb-ChIP-Seq(GSE11431)/Homer	1e-31	0	201	0.2202	4255.4	0.0897
13		Atf4(bZIP)/MEF-Atf4-ChIP-Seq(GSE35681)/Homer	1e-30	0	112	0.1227	1585.8	0.0334
14		FXR(NR),IR1/Liver-FXR-ChIP-Seq(Chong et al.)/Homer	1e-24	0	121	0.1325	2186.3	0.0461
15		TR4(NR),DR1/Hela-TR4-ChIP-Seq(GSE24685)/Homer	1e-23	0	65	0.0712	698.7	0.0147
16		Chop(bZIP)/MEF-Chop-ChIP-Seq(GSE35681)/Homer	1e-23	0	88	0.0964	1283.1	0.0271
17		FOXP1(Forkhead)/H9-FOXP1-ChIP-Seq(GSE31006)/Homer	1e-20	0	133	0.1457	2794.6	0.0589
18		Gata2(Zf)/K562-GATA2-ChIP-Seq(GSE18829)/Homer	1e-20	0	167	0.1829	4007	0.0845
19		NF1-halfsite(CTF)/LNCaP-NF1-ChIP-Seq(Unpublished)/Homer	1e-19	0	341	0.3735	11186.8	0.2359
20		Gata1(Zf)/K562-GATA1-ChIP-Seq(GSE18829)/Homer	1e-18	0	151	0.1654	3591.9	0.0758
21		Gata4(Zf)/Heart-Gata4-ChIP-Seq(GSE35151)/Homer	1e-18	0	221	0.2421	6282.5	0.1325
22		Nur77(NR)/K562-NR4A1-ChIP-Seq(GSE31363)/Homer	1e-17	0	75	0.0821	1185.1	0.025
23		GATA3(Zf)/iTreg-Gata3-ChIP-Seq(GSE20898)/Homer	1e-17	0	289	0.3165	9334.1	0.1969
24		Nr5a2(NR)/Pancreas-LRH1-ChIP-Seq(GSE34295)/Homer	1e-16	0	169	0.1851	4498.5	0.0949
25		Foxo1(Forkhead)/RAW-Foxo1-ChIP-Seq(Fan et al.)/Homer	1e-14	0	350	0.3834	12448.6	0.2625
26		NFY(CCAAT)/Promoter/Homer	1e-14	0	178	0.195	5028.9	0.1061
27		Nr5a2(NR)/mES-Nr5a2-ChIP-Seq(GSE19019)/Homer	1e-12	0	125	0.1369	3209.7	0.0677
28		Atf1(bZIP)/K562-ATF1-ChIP-Seq(GSE31477)/Homer	1e-12	0	145	0.1588	3999.7	0.0844
29		NF1:FOXA1(CTF,Forkhead)/LNCAP-FOXA1-ChIP-Seq(GSE27824)/Homer	1e-12	0	34	0.0372	368.8	0.0078
30		BMAL1(bHLH)/Liver-Bmal1-ChIP-Seq(GSE39860)/Homer	1e-12	0	317	0.3472	11378.9	0.24
31		NF1(CTF)/LNCAP-NF1-ChIP-Seq(Unpublished)/Homer	1e-11	0	86	0.0942	1940.6	0.0409
32		CLOCK(bHLH)/Liver-Clock-ChIP-Seq(GSE39860)/Homer	1e-11	0	117	0.1281	3082.7	0.065
33		NPAS2(bHLH)/Liver-NPAS2-ChIP-Seq(GSE39860)/Homer	1e-11	0	204	0.2234	6617.3	0.1396
34		THRa(NR)/C17.2-THRa-ChIP-Seq(GSE38347)/Homer	1e-11	0	95	0.1041	2302.3	0.0486
35		RORgt(NR)/EL4-RORgt.Flag-ChIP-Seq(GSE56019)/Homer	1e-10	0	46	0.0504	737	0.0155
36		Lhx3(Homeobox)/Neuron-Lhx3-ChIP-Seq(GSE31456)/Homer	1e-10	0	283	0.31	10167.6	0.2144
37		USF1(bHLH)/GM12878-Usf1-ChIP-Seq(GSE32465)/Homer	1e-09	0	92	0.1008	2321.5	0.049
38		AR-halfsite(NR)/LNCaP-AR-ChIP-Seq(GSE27824)/Homer	1e-09	0	552	0.6046	23789.4	0.5017
39		Tcf3(HMG)/mES-Tcf3-ChIP-Seq(GSE11724)/Homer	1e-09	0	73	0.08	1692.8	0.0357
40		MITF(bHLH)/MastCells-MITF-ChIP-Seq(GSE48085)/Homer	1e-09	0	179	0.1961	5884.9	0.1241
41		LXRE(NR),DR4/RAW-LXRb.biotin-ChIP-Seq(GSE21512)/Homer	1e-08	0	25	0.0274	295.5	0.0062
42		Hnf1(Homeobox)/Liver-Foxa2-Chip-Seq(GSE25694)/Homer	1e-08	0	38	0.0416	653	0.0138
43		c-Myc(bHLH)/LNCAP-cMyc-ChIP-Seq(Unpublished)/Homer	1e-08	0	73	0.08	1826.2	0.0385
44		Atf7(bZIP)/3T3L1-Atf7-ChIP-Seq(GSE56872)/Homer	1e-07	0	96	0.1051	2772	0.0585
45		RARg(NR)/ES-RARg-ChIP-Seq(GSE30538)/Homer	1e-06	0	17	0.0186	183.9	0.0039
46		Tcf4(HMG)/Hct116-Tcf4-ChIP-Seq(SRA012054)/Homer	1e-05	0	98	0.1073	3087.5	0.0651
47		ARE(NR)/LNCAP-AR-ChIP-Seq(GSE27824)/Homer	1e-05	0	57	0.0624	1503.6	0.0317
48		Srebp2(bHLH)/HepG2-Srebp2-ChIP-Seq(GSE31477)/Homer	1e-05	0	32	0.035	643.6	0.0136
49		Usf2(bHLH)/C2C12-Usf2-ChIP-Seq(GSE36030)/Homer	1e-05	0	66	0.0723	1849.8	0.039
50		Nkx6.1(Homeobox)/Islet-Nkx6.1-ChIP-Seq(GSE40975)/Homer	1e-05	0	374	0.4096	15928.3	0.3359
51		Atf2(bZIP)/3T3L1-Atf2-ChIP-Seq(GSE56872)/Homer	1e-05	0	68	0.0745	1953.8	0.0412
52		Max(bHLH)/K562-Max-ChIP-Seq(GSE31477)/Homer	1e-05	0	110	0.1205	3694.3	0.0779
53		VDR(NR),DR3/GM10855-VDR+vitD-ChIP-Seq(GSE22484)/Homer	1e-05	0	45	0.0493	1130.2	0.0238
54		Tlx?(NR)/NPC-H3K4me1-ChIP-Seq(GSE16256)/Homer	1e-05	0	77	0.0843	2358.8	0.0497
55		BMYB(HTH)/Hela-BMYB-ChIP-Seq(GSE27030)/Homer	1e-05	0	253	0.2771	10231.4	0.2158
56		MYB(HTH)/ERMYB-Myb-ChIPSeq(GSE22095)/Homer	1e-05	0	280	0.3067	11535.7	0.2433
57		Gfi1b(Zf)/HPC7-Gfi1b-ChIP-Seq(GSE22178)/Homer	0.0001	0.0001	111	0.1216	3879.7	0.0818
58		c-Jun-CRE(bZIP)/K562-cJun-ChIP-Seq(GSE31477)/Homer	0.0001	0.0001	60	0.0657	1775.1	0.0374
59		Nanog(Homeobox)/mES-Nanog-ChIP-Seq(GSE11724)/Homer	0.0001	0.0002	559	0.6123	25929.6	0.5469
60		AMYB(HTH)/Testes-AMYB-ChIP-Seq(GSE44588)/Homer	0.0001	0.0002	258	0.2826	10751.8	0.2268
61		Foxh1(Forkhead)/hESC-FOXH1-ChIP-Seq(GSE29422)/Homer	0.0001	0.0002	110	0.1205	3919.7	0.0827
62		Reverb(NR),DR2/RAW-Reverba.biotin-ChIP-Seq(GSE45914)/Homer	0.0001	0.0002	31	0.034	733	0.0155
63		TCFL2(HMG)/K562-TCF7L2-ChIP-Seq(GSE29196)/Homer	0.0001	0.0004	25	0.0274	546.5	0.0115
64		Pdx1(Homeobox)/Islet-Pdx1-ChIP-Seq(SRA008281)/Homer	0.001	0.0006	153	0.1676	5959.7	0.1257
65		Pax7(Paired,Homeobox)/Myoblast-Pax7-ChIP-Seq(GSE25064)/Homer	0.001	0.0007	22	0.0241	470.1	0.0099
66		bHLHE40(bHLH)/HepG2-BHLHE40-ChIP-Seq(GSE31477)/Homer	0.001	0.0017	47	0.0515	1439.4	0.0304
67		n-Myc(bHLH)/mES-nMyc-ChIP-Seq(GSE11431)/Homer	0.001	0.0021	96	0.1051	3543	0.0747
68		Six1(Homeobox)/Myoblast-Six1-ChIP-Chip(GSE20150)/Homer	0.001	0.0022	46	0.0504	1418.5	0.0299
69		PR(NR)/T47D-PR-ChIP-Seq(GSE31130)/Homer	0.001	0.0022	317	0.3472	14078.2	0.2969
70		Srebp1a(bHLH)/HepG2-Srebp1a-ChIP-Seq(GSE31477)/Homer	0.001	0.0024	39	0.0427	1151.6	0.0243
71		Lhx2(Homeobox)/HFSC-Lhx2-ChIP-Seq(GSE48068)/Homer	0.001	0.0035	152	0.1665	6174.5	0.1302
72		Smad3(MAD)/NPC-Smad3-ChIP-Seq(GSE36673)/Homer	0.01	0.0039	402	0.4403	18485	0.3899
73		GRE(NR),IR3/A549-GR-ChIP-Seq(GSE32465)/Homer	0.01	0.0045	28	0.0307	767.9	0.0162
74		CRX(Homeobox)/Retina-Crx-ChIP-Seq(GSE20012)/Homer	0.01	0.0055	299	0.3275	13383.2	0.2823
75		CEBP:CEBP(bZIP)/MEF-Chop-ChIP-Seq(GSE35681)/Homer	0.01	0.0055	28	0.0307	779.9	0.0164
76		ERE(NR),IR3/MCF7-ERa-ChIP-Seq(Unpublished)/Homer	0.01	0.0055	48	0.0526	1578.9	0.0333
77		GRE(NR),IR3/RAW264.7-GRE-ChIP-Seq(Unpublished)/Homer	0.01	0.0057	45	0.0493	1457.9	0.0307
78		E-box(bHLH)/Promoter/Homer	0.01	0.012	14	0.0153	312	0.0066
79		HOXA2(Homeobox)/mES-Hoxa2-ChIP-Seq(Donaldson et al.)/Homer	0.01	0.0166	22	0.0241	615.9	0.013
80		c-Myc(bHLH)/mES-cMyc-ChIP-Seq(GSE11431)/Homer	0.01	0.0231	68	0.0745	2592.6	0.0547
81		Meis1(Homeobox)/MastCells-Meis1-ChIP-Seq(GSE48085)/Homer	0.01	0.0251	267	0.2924	12160.3	0.2565
