# Supplementary material for: Massively parallel cis-regulatory analysis in the mammalian central nervous system
Source: HighWire-hosted journal article supplement (doi:10.1101/gr.193789.115), 2015-11-17
Supplement: SuppTable3_GO-analysis_v2.xlsx [file SuppTable3_GO-analysis_v2.xlsx]

## Sheet: Retina_DHS
Term	Background frequency	Sample frequency	Expected	+/-	P-value
sensory perception of light stimulus (GO:0050953)	121	42	4.166	+	3.673e-24
visual perception (GO:0007601)	117	41	4.029	+	1.117e-23
cellular process (GO:0009987)	12843	581	442.2	+	6.061e-22
single-organism process (GO:0044699)	11876	536	408.9	+	4.204e-17
system development (GO:0048731)	3389	216	116.7	+	3.264e-16
anatomical structure development (GO:0048856)	4001	242	137.8	+	5.035e-16
developmental process (GO:0032502)	4496	261	154.8	+	1.92e-15
single-organism developmental process (GO:0044767)	4474	260	154.1	+	2.043e-15
generation of neurons (GO:0048699)	1212	107	41.73	+	8.603e-15
nervous system development (GO:0007399)	1715	133	59.05	+	1.341e-14
multicellular organismal development (GO:0007275)	3922	233	135	+	3.191e-14
eye development (GO:0001654)	313	49	10.78	+	4.652e-14
single-organism cellular process (GO:0044763)	10482	479	360.9	+	5.626e-14
photoreceptor cell differentiation (GO:0046530)	56	23	1.928	+	1.191e-13
neurogenesis (GO:0022008)	1289	108	44.38	+	2.162e-13
detection of chemical stimulus involved in sensory perception of smell (GO:0050911)	1075	0	37.02	-	2.376e-13
detection of light stimulus (GO:0009583)	46	21	1.584	+	3.804e-13
cellular developmental process (GO:0048869)	3113	193	107.2	+	1.241e-12
retina development in camera-type eye (GO:0060041)	122	30	4.201	+	1.521e-12
eye photoreceptor cell differentiation (GO:0001754)	44	20	1.515	+	2.272e-12

## Sheet: Brain_DHS
Term	Background frequency	Sample frequency	Expected	+/-	P-value
nervous system development (GO:0007399)	1715	129	55.9	+	5.557e-15
neurogenesis (GO:0022008)	1289	105	42.01	+	8.973e-14
single-organism process (GO:0044699)	11876	498	387.1	+	2.679e-13
generation of neurons (GO:0048699)	1212	98	39.5	+	2.013e-12
cell differentiation (GO:0030154)	2964	178	96.6	+	2.373e-12
single-organism cellular process (GO:0044763)	10482	449	341.6	+	6.235e-12
cellular process (GO:0009987)	12843	522	418.6	+	9.42e-12
single-organism behavior (GO:0044708)	398	50	12.97	+	1.245e-11
system development (GO:0048731)	3389	193	110.5	+	1.668e-11
regulation of transport (GO:0051049)	1500	110	48.89	+	1.791e-11
regulation of localization (GO:0032879)	2037	135	66.39	+	1.819e-11
regulation of biological quality (GO:0065008)	2516	155	82	+	4.525e-11
single-organism localization (GO:1902578)	2572	157	83.83	+	6.192e-11
neuron differentiation (GO:0030182)	788	72	25.68	+	8.311e-11
multicellular organismal development (GO:0007275)	3922	212	127.8	+	8.949e-11
cellular developmental process (GO:0048869)	3113	179	101.5	+	1.095e-10
developmental process (GO:0032502)	4496	234	146.5	+	1.185e-10
regulation of cell communication (GO:0010646)	2477	152	80.73	+	1.235e-10
single-organism developmental process (GO:0044767)	4474	233	145.8	+	1.305e-10
regulation of membrane potential (GO:0042391)	292	41	9.517	+	1.337e-10

## Sheet: Heart_DHS
Term	Background frequency	Sample frequency	Expected	+/-	P-value
regulation of multicellular organismal process (GO:0051239)	2271	188	74.83	+	1.011e-28
circulatory system development (GO:0072359)	720	98	23.73	+	5.394e-28
cardiovascular system development (GO:0072358)	720	98	23.73	+	5.394e-28
tissue development (GO:0009888)	1433	142	47.22	+	7.093e-28
single-organism developmental process (GO:0044767)	4474	284	147.4	+	3.044e-27
system development (GO:0048731)	3389	237	111.7	+	4.366e-27
positive regulation of biological process (GO:0048518)	4468	283	147.2	+	6.09e-27
developmental process (GO:0032502)	4496	284	148.2	+	7.056e-27
multicellular organismal development (GO:0007275)	3922	258	129.2	+	3.893e-26
positive regulation of cellular process (GO:0048522)	3943	256	129.9	+	5.696e-25
anatomical structure development (GO:0048856)	4001	258	131.8	+	8.709e-25
organ development (GO:0048513)	2476	186	81.59	+	3.301e-23
regulation of developmental process (GO:0050793)	2002	159	65.97	+	1.981e-21
negative regulation of biological process (GO:0048519)	3945	246	130	+	4.365e-21
cell differentiation (GO:0030154)	2964	202	97.67	+	1.647e-20
anatomical structure morphogenesis (GO:0009653)	1900	151	62.61	+	4.1e-20
blood vessel development (GO:0001568)	428	64	14.1	+	3.38e-19
heart development (GO:0007507)	418	63	13.77	+	5.036e-19
cellular developmental process (GO:0048869)	3113	204	102.6	+	9.958e-19
vasculature development (GO:0001944)	453	65	14.93	+	1.284e-18

## Sheet: Liver_DHS
Term	Background frequency	Sample frequency	Expected	+/-	P-value
metabolic process (GO:0008152)	7804	411	254	+	8.869e-29
organic substance metabolic process (GO:0071704)	7151	377	232.7	+	1.043e-24
single-organism process (GO:0044699)	11876	531	386.5	+	1.879e-24
primary metabolic process (GO:0044238)	6870	362	223.6	+	5.716e-23
cellular process (GO:0009987)	12843	555	418	+	8.687e-23
cellular metabolic process (GO:0044237)	6683	353	217.5	+	3.371e-22
positive regulation of biological process (GO:0048518)	4468	262	145.4	+	5.812e-20
single-organism cellular process (GO:0044763)	10482	475	341.2	+	7.887e-20
small molecule metabolic process (GO:0044281)	1333	117	43.39	+	2.506e-18
single-organism metabolic process (GO:0044710)	3313	209	107.8	+	4.6e-18
positive regulation of cellular process (GO:0048522)	3943	228	128.3	+	1.479e-15
negative regulation of biological process (GO:0048519)	3945	226	128.4	+	7.153e-15
lipid metabolic process (GO:0006629)	911	86	29.65	+	2.27e-14
negative regulation of cellular process (GO:0048523)	3616	210	117.7	+	5.106e-14
biological regulation (GO:0065007)	10298	448	335.2	+	2.066e-13
positive regulation of metabolic process (GO:0009893)	2798	173	91.07	+	4.177e-13
regulation of cellular metabolic process (GO:0031323)	4767	252	155.2	+	6.839e-13
organic acid metabolic process (GO:0006082)	770	75	25.06	+	7.726e-13
regulation of metabolic process (GO:0019222)	5368	273	174.7	+	2.312e-12
oxoacid metabolic process (GO:0043436)	753	73	24.51	+	2.592e-12
