# Supplementary material for: Massively parallel cis-regulatory analysis in the mammalian central nervous system
Source: HighWire-hosted journal article supplement (doi:10.1101/gr.193789.115), 2015-11-17
Supplement: SuppTable4.docx [file SuppTable4.docx]

**Supplemental Table S4. Correlation between replicates for RNA reads.** Pairwise Pearson correlation values (Pearson r) between biological replicates for raw RNA read counts were calculated for all individual barcoded constructs with at least 10 DNA reads in all three replicates for the tissue (~36,000 barcodes for retina and ~39,000 barcodes for cerebral cortex).

|  | **Retina replicate #1** | **Retina replicate #2** | **Retina replicate #3** |
| --- | --- | --- | --- |
| **Retina replicate #1** |  |  |  |
| **Retina replicate #2** | 0.968 |  |  |
| **Retina replicate #3** | 0.961 | 0.969 |  |

|  | **Cortex replicate #1** | **Cortex replicate #2** | **Cortex replicate #3** |
| --- | --- | --- | --- |
| **Cortex replicate #1** |  |  |  |
| **Cortex replicate #2** | 0.799 |  |  |
| **Cortex replicate #3** | 0.847 | 0.843 |  |
