# Supplementary material for: Massively parallel cis-regulatory analysis in the mammalian central nervous system
Source: HighWire-hosted journal article supplement (doi:10.1101/gr.193789.115), 2015-11-17
Supplement: SuppTable5_comment24a_motif_enrichment.xlsx [file SuppTable5_comment24a_motif_enrichment.xlsx]

## Sheet: retina DNase-seq
Rank	Motif	P-value (de novo discovery)	% of all retina DNase-seq peaks with hits	% of background with hits	Best Match/Details
1		1e-2489	0.4462	0.014	CTCF(Zf)/CD4+-CTCF-ChIP-Seq(Barski et al.)/Homer(0.920)
2		1e-718	0.5812	0.2077	Sp1(Zf)/Promoter/Homer(0.942)
3		1e-568	0.3211	0.0736	NFY(CCAAT)/Promoter/Homer(0.946),BestGuess:HAP2/Literature(Harbison)/Yeast(0.966)
4		1e-399	0.2131	0.0411	MA0467.1_Crx/Jaspar(0.892)
5		1e-385	0.3416	0.115	Elk4(ETS)/Hela-Elk4-ChIP-Seq(GSE31477)/Homer(0.988)
6		1e-291	0.2286	0.0669	NRF1(NRF)/MCF7-NRF1-ChIP-Seq(Unpublished)/Homer(0.969)
7		1e-256	0.2683	0.0977	MA0018.2_CREB1/Jaspar(0.846)
8		1e-225	0.0827	0.0102	GFY(?)/Promoter/Homer(0.977)
9		1e-224	0.5628	0.3337	PB0113.1_E2F3_2/Jaspar(0.807),BestGuess:brk/dmmpmm(Bergman)/fly(0.878)
10		1e-148	0.0467	0.0041	PB0076.1_Sp4_1/Jaspar(0.683),BestGuess:RCS1/RCS1_H2O2Hi/35-RCS1(Harbison)/Yeast(0.719)
11		1e-139	0.0143	0.0001	YY1(Zf)/Promoter/Homer(0.665),BestGuess:MA0531.1_CTCF/Jaspar(0.759)
12		1e-112	0.0983	0.0299	ZNF143|STAF(Zf)/CUTLL-ZNF143-ChIP-Seq(GSE29600)/Homer(0.933)
13		1e-94	0.0749	0.0199	NeuroD1(bHLH)/Islet-NeuroD1-ChIP-Seq(GSE30298)/Homer(0.884)
14		1e-78	0.0458	0.0098	MA0527.1_ZBTB33/Jaspar(0.915)
15		1e-65	0.0674	0.0218	PB0185.1_Tcf1_2/Jaspar(0.770)
16		1e-55	0.0522	0.016	MA0052.2_MEF2A/Jaspar(0.915)
17		1e-50	0.0256	0.0044	RORgt(NR)/EL4-RORgt.Flag-ChIP-Seq(GSE56019)/Homer(0.986)

## Sheet: brain DNase-seq
Rank	Motif	P-value (de novo discovery)	% of all brain DNase-seq peaks with hits	% of background with hits	Best Match/Details
1		1e-721	0.385	0.0862	NFY(CCAAT)/Promoter/Homer(0.943),BestGuess:HAP2/Literature(Harbison)/Yeast(0.960)
2		1e-718	0.5385	0.1773	Sp1(Zf)/Promoter/Homer(0.950)
3		1e-710	0.2814	0.0398	NeuroD1(bHLH)/Islet-NeuroD1-ChIP-Seq(GSE30298)/Homer(0.925)
4		1e-364	0.2968	0.0921	Elk1(ETS)/Hela-Elk1-ChIP-Seq(GSE31477)/Homer(0.985)
5		1e-258	0.1758	0.0424	Fra1(bZIP)/BT549-Fra1-ChIP-Seq(GSE46166)/Homer(0.975)
6		1e-231	0.0834	0.01	GFY(?)/Promoter/Homer(0.978)
7		1e-230	0.2567	0.0967	CRE(bZIP)/Promoter/Homer(0.842),BestGuess:TYE7/TYE7_YPD/39-CBF1(Harbison)/Yeast(0.872)
8		1e-215	0.194	0.062	NRF1(NRF)/MCF7-NRF1-ChIP-Seq(Unpublished)/Homer(0.954)
9		1e-183	0.4797	0.28	NF1-halfsite(CTF)/LNCaP-NF1-ChIP-Seq(Unpublished)/Homer(0.944)
10		1e-131	0.1137	0.0328	Mef2c(MADS)/GM12878-Mef2c-ChIP-Seq(GSE32465)/Homer(0.983)
11		1e-79	0.0478	0.0104	ZNF143|STAF(Zf)/CUTLL-ZNF143-ChIP-Seq(GSE29600)/Homer(0.942)
12		1e-76	0.0418	0.0078	Rfx1(HTH)/NPC-H3K4me1-ChIP-Seq(GSE16256)/Homer(0.945)
13		1e-73	0.3528	0.2346	PB0207.1_Zic3_2/Jaspar(0.834)

## Sheet: low vs high
Assayed tissue	Category	Motif	TF (best match)	p-value	q value	# of hits in target	% of targets with hits	# of hits in background	% of background with hits
retina	low	TGSCARVHNN	NF1-halfsite(CTF)	0.000992781	0.0208	54	56.84	20101.1	40.57
retina	low	ASCAGATGGH	NeuroD1(bHLH)	0.00453015	0.0476	15	15.79	3699.6	7.47
retina	low	TGACCTACTT	RORgt(NR)	0.0215366	0.1507	4	4.21	548	1.11
retina	low	BBRTGASTCA	Fra1(bZIP)	0.0668703	0.3509	16	16.84	5597.1	11.3
retina	low	TAAGCGGATTAG	MA0467.1_Crx	0.0727301	0.3509	14	14.74	4787.6	9.66
retina	low	TAGCGCCM	PB0113.1_E2F3_2	0.0746459	0.3509	45	47.37	19607.7	39.58
retina	low	GCTATTTTTAGM	Mef2c(MADS)	0.0999585	0.3509	16	16.84	5933	11.98
retina	low	TAATCCGGCTTA	PB0185.1_Tcf1_2	0.10614	0.3509	8	8.42	2494.8	5.04
retina	low	GGGGGCAGTA	PB0076.1_Sp4_1	0.124059	0.3509	2	2.11	317.6	0.64
retina	low	TCTCGCGATA	MA0527.1_ZBTB33	0.168301	0.3534	1	1.05	96.8	0.2
retina	low	WRCCGGAART	Elk4(ETS)	0.322066	0.6147	6	6.32	2427.8	4.9
retina	low	NTGCGCATGCGC	NRF1(NRF)	0.399197	0.6986	1	1.05	266	0.54
retina	low	WRGCCCCGCCCC	Sp1(Zf)	0.449149	0.7255	4	4.21	1787.8	3.61
retina	low	BNYGATTGGYYR	NFY(CCAAT)	0.578625	0.8679	11	11.58	5867	11.84
retina	low	GGCATKCTGGGA	ZNF143|STAF(Zf)	0.584382	0.8679	4	4.21	2122.7	4.28
retina	low	GCCMYCTRGTGG	CTCF(Zf)	0.592088	0.8679	2	2.11	1034.2	2.09
retina	low	CAKGCTGTBT	PB0207.1_Zic3_2	0.637692	0.8679	31	32.63	16779.1	33.87
retina	low	TSACGTSAYN	MA0018.2_CREB1	0.903752	1	4	4.21	3447.2	6.96
retina	low	ACTACAATTCCC	GFY(?)	1	1	0	0	197	0.4
retina	low	AGRTGGCGGTGT	YY1(Zf)	1	1	0	0	13.6	0.03
retina	low	GTTGCCATGGCA	Rfx1(HTH)	1	1	0	0	700.6	1.41
retina	high	TAAGCGGATTAG	MA0467.1_Crx	3.47164e-25	0	57	59.38	6817.3	13.77
retina	high	ASCAGATGGH	NeuroD1(bHLH)	1.87404e-07	0	25	26.04	4094.3	8.27
retina	high	TGACCTACTT	RORgt(NR)	2.09195e-07	0	11	11.46	733.9	1.48
retina	high	GCTATTTTTAGM	Mef2c(MADS)	0.00450305	0.0236	28	29.17	8842.5	17.86
retina	high	TAATCCGGCTTA	PB0185.1_Tcf1_2	0.0116903	0.0491	13	13.54	3313	6.69
retina	high	BNYGATTGGYYR	NFY(CCAAT)	0.0180069	0.063	21	21.88	6746.5	13.63
retina	high	BBRTGASTCA	Fra1(bZIP)	0.062662	0.1879	18	18.75	6356.6	12.84
retina	high	GGCATKCTGGGA	ZNF143|STAF(Zf)	0.3795	0.9961	6	6.25	2566	5.18
retina	high	GCCMYCTRGTGG	CTCF(Zf)	0.392979	0.9961	3	3.12	1163.8	2.35
retina	high	GTTGCCATGGCA	Rfx1(HTH)	0.413334	0.9961	2	2.08	728.2	1.47
retina	high	NTGCGCATGCGC	NRF1(NRF)	0.480994	0.9961	1	1.04	337.9	0.68
retina	high	TGSCARVHNN	NF1-halfsite(CTF)	0.510329	0.9961	42	43.75	21473.1	43.38
retina	high	TSACGTSAYN	MA0018.2_CREB1	0.616128	0.9961	7	7.29	3816.7	7.71
retina	high	WRGCCCCGCCCC	Sp1(Zf)	0.689768	1	4	4.17	2400.4	4.85
retina	high	WRCCGGAART	Elk4(ETS)	0.696631	1	5	5.21	2995.8	6.05
retina	high	CAKGCTGTBT	PB0207.1_Zic3_2	0.720867	1	33	34.38	18198.9	36.77
retina	high	TAGCGCCM	PB0113.1_E2F3_2	0.915102	1	36	37.5	21733.7	43.91
retina	high	ACTACAATTCCC	GFY(?)	1	1	0	0	258.3	0.52
retina	high	AGRTGGCGGTGT	YY1(Zf)	1	1	0	0	16	0.03
retina	high	GGGGGCAGTA	PB0076.1_Sp4_1	1	1	0	0	324.7	0.66
retina	high	TCTCGCGATA	MA0527.1_ZBTB33	1	1	0	0	112	0.23
cortex	low	ASCAGATGGH	NeuroD1(bHLH)	6.25428e-09	0	27	29.03	4162.7	8.37
cortex	low	BNYGATTGGYYR	NFY(CCAAT)	0.000161662	0.0017	25	26.88	6270	12.6
cortex	low	TGSCARVHNN	NF1-halfsite(CTF)	0.000601551	0.0042	56	60.22	21374.1	42.96
cortex	low	TAAGCGGATTAG	MA0467.1_Crx	0.0221703	0.1163	16	17.2	4985.7	10.02
cortex	low	TAATCCGGCTTA	PB0185.1_Tcf1_2	0.0224604	0.1163	10	10.75	2580.9	5.19
cortex	low	TSACGTSAYN	MA0018.2_CREB1	0.0629761	0.2204	11	11.83	3509.6	7.05
cortex	low	TAGCGCCM	PB0113.1_E2F3_2	0.0890996	0.2672	47	50.54	21430.9	43.07
cortex	low	GCTATTTTTAGM	Mef2c(MADS)	0.164804	0.4328	15	16.13	6114.3	12.29
cortex	low	GTTGCCATGGCA	Rfx1(HTH)	0.18656	0.4354	3	3.23	795.5	1.6
cortex	low	BBRTGASTCA	Fra1(bZIP)	0.186934	0.4354	14	15.05	5771.8	11.6
cortex	low	ACTACAATTCCC	GFY(?)	0.342666	0.6543	1	1.08	224.8	0.45
cortex	low	NTGCGCATGCGC	NRF1(NRF)	0.411684	0.7204	1	1.08	283.2	0.57
cortex	low	GGGGGCAGTA	PB0076.1_Sp4_1	0.447088	0.7222	1	1.08	316.7	0.64
cortex	low	CAKGCTGTBT	PB0207.1_Zic3_2	0.581061	0.8716	32	34.41	17382	34.93
cortex	low	WRGCCCCGCCCC	Sp1(Zf)	0.609388	0.8716	4	4.3	2246.1	4.51
cortex	low	GCCMYCTRGTGG	CTCF(Zf)	0.889585	1	1	1.08	1165.7	2.34
cortex	low	GGCATKCTGGGA	ZNF143|STAF(Zf)	0.958966	1	2	2.15	2610	5.25
cortex	low	WRCCGGAART	Elk4(ETS)	0.965519	1	2	2.15	2715.1	5.46
cortex	low	AGRTGGCGGTGT	YY1(Zf)	1	1	0	0	10.1	0.02
cortex	low	TCTCGCGATA	MA0527.1_ZBTB33	1	1	0	0	84.8	0.17
cortex	low	TGACCTACTT	RORgt(NR)	1	1	0	0	603.6	1.21
cortex	high	ASCAGATGGH	NeuroD1(bHLH)	5.61921e-14	0	36	38.3	4684.3	9.42
cortex	high	GCTATTTTTAGM	Mef2c(MADS)	3.47471e-06	0	26	27.66	5272.7	10.61
cortex	high	TGSCARVHNN	NF1-halfsite(CTF)	0.000904616	0.0063	59	62.77	22966.6	46.2
cortex	high	GTTGCCATGGCA	Rfx1(HTH)	0.00102917	0.0063	7	7.45	828.2	1.67
cortex	high	TAAGCGGATTAG	MA0467.1_Crx	0.0277644	0.1166	15	15.96	4643.7	9.34
cortex	high	CAKGCTGTBT	PB0207.1_Zic3_2	0.0330412	0.1166	47	50	19942.5	40.12
cortex	high	BBRTGASTCA	Fra1(bZIP)	0.0612985	0.184	16	17.02	5610.1	11.29
cortex	high	TCTCGCGATA	MA0527.1_ZBTB33	0.178708	0.4691	1	1.06	104.7	0.21
cortex	high	TAATCCGGCTTA	PB0185.1_Tcf1_2	0.351692	0.8204	6	6.38	2549.8	5.13
cortex	high	GCCMYCTRGTGG	CTCF(Zf)	0.509411	1	3	3.19	1429.6	2.88
cortex	high	WRCCGGAART	Elk4(ETS)	0.536762	1	6	6.38	3101.6	6.24
cortex	high	GGGGGCAGTA	PB0076.1_Sp4_1	0.545256	1	1	1.06	415	0.83
cortex	high	BNYGATTGGYYR	NFY(CCAAT)	0.617424	1	11	11.7	6117.8	12.31
cortex	high	TGACCTACTT	RORgt(NR)	0.690251	1	1	1.06	616.6	1.24
cortex	high	GGCATKCTGGGA	ZNF143|STAF(Zf)	0.710064	1	5	5.32	3121.5	6.28
cortex	high	TSACGTSAYN	MA0018.2_CREB1	0.7455	1	6	6.38	3855.8	7.76
cortex	high	TAGCGCCM	PB0113.1_E2F3_2	0.824647	1	41	43.62	23810.4	47.9
cortex	high	WRGCCCCGCCCC	Sp1(Zf)	0.99571	1	1	1.06	2801.4	5.64
cortex	high	ACTACAATTCCC	GFY(?)	1	1	0	0	236.5	0.48
cortex	high	AGRTGGCGGTGT	YY1(Zf)	1	1	0	0	19.7	0.04
cortex	high	NTGCGCATGCGC	NRF1(NRF)	1	1	0	0	336.2	0.68
