# Supplementary material for: Massively parallel cis-regulatory analysis in the mammalian central nervous system
Source: HighWire-hosted journal article supplement (doi:10.1101/gr.193789.115), 2015-11-17
Supplement: SuppTable6.docx [file SuppTable6.docx]

**Supplemental Table S6. Area under the curve (AUC) values for logistic regression models.** AUC values for each of the logistic regression models (see ROC curves in Figure 5F), including the AUC values for the five-fold cross validation (CV) tests.

Retina

| **Model type** | **Overall AUC** | **CV 1 AUC** | **CV 2 AUC** | **CV 3 AUC** | **CV 4 AUC** | **CV 5 AUC** |
| --- | --- | --- | --- | --- | --- | --- |
| GC content | 0.521 | 0.543 | 0.524 | 0.493 | 0.517 | 0.531 |
| PhastCons | 0.537 | 0.527 | 0.531 | 0.531 | 0.554 | 0.541 |
| TF motifs | 0.785 | 0.797 | 0.807 | 0.785 | 0.777 | 0.760 |
| CRX ChIP-seq | 0.892 | 0.880 | 0.901 | 0.896 | 0.900 | 0.886 |
| Retina DNase-seq | 0.921 | 0.913 | 0.924 | 0.928 | 0.927 | 0.913 |
| Combined | 0.932 | 0.929 | 0.936 | 0.937 | 0.937 | 0.923 |

Cerebral cortex

| **Model type** | **Overall AUC** | **CV 1 AUC** | **CV 2 AUC** | **CV 3 AUC** | **CV 4 AUC** | **CV 5 AUC** |
| --- | --- | --- | --- | --- | --- | --- |
| GC content | 0.608 | 0.613 | 0.605 | 0.587 | 0.637 | 0.603 |
| PhastCons | 0.659 | 0.678 | 0.679 | 0.685 | 0.648 | 0.600 |
| TF motifs | 0.734 | 0.692 | 0.742 | 0.760 | 0.763 | 0.712 |
| Brain DNase-seq | 0.778 | 0.776 | 0.787 | 0.773 | 0.789 | 0.767 |
| Combined | 0.824 | 0.809 | 0.837 | 0.832 | 0.844 | 0.798 |
