# Supplementary material for: Massively parallel cis-regulatory analysis in the mammalian central nervous system
Source: HighWire-hosted journal article supplement (doi:10.1101/gr.193789.115), 2015-11-17
Supplement: SuppTable7.docx [file SuppTable7.docx]

**Supplemental Table S7. Predicted affinities of CRX sites within critical regions tested by traditional fluorescent reporter assays.** Critical regions tested by traditional fluorescent reporter assays contained CRX sites that were inactivated by point mutations (Fig. 7). The affinities of the wild type (WT) and mutant (MT) CRX sites, relative to the 8 bp consensus motif ‘CTAATCCC’, are based on previous quantitative CRX *in vitro* binding assays (Lee et al. 2010). Note that whereas Figure 7A shows the sequences of plus strand DNA, motif sequences below are for the minus or plus strand, depending on the orientation of the CRX site.

| **Locus** | **Motif strand** | **WT motif** | **WT motif affinity** | **MT motif** | **MT motif affinity** |
| --- | --- | --- | --- | --- | --- |
| R64 | Minus | CTAATCCT | 74.40% | CTACTCCT | 0.30% |
| R28, site 1 | Plus | CTAATCTA | 27.13% | CTACTCTA | 0.11% |
| R28, site 2 | Plus | ATAATCCC | 79.20% | ATACTCCC | 0.32% |
| R62, site 1 | Minus | CTAAGCTG | 8.47% | CTACGCTG | 0.03% |
| R62, site 2 | Plus | GTAATCGG | 9.81% | GTACTCGG | 0.04% |
