# Supplementary material for: Massively parallel cis-regulatory analysis in the mammalian central nervous system
Source: HighWire-hosted journal article supplement (doi:10.1101/gr.193789.115), 2015-11-17
Supplement: SuppTable8.docx [file SuppTable8.docx]

**Supplemental Table S8. Comparison of capture in the current study and CapSTARR-seq.** Compared to CapSTARR-seq (Vanhille et al. 2015), the current study used more stringent capture conditions and achieved a higher on-target rate. Moreover, the current study precisely mapped the ends of the captured fragments, permitting truncation mutation analysis.

|  | **Current Study** | **CapSTARR-seq** |
| --- | --- | --- |
| **Template DNA** | Mouse genomic DNA | Mouse genomic DNA |
| **DNA fragmentation method** | Sonication | Sonication |
| **Fragment lengths** | Precisely known, based on mapping of ends  25th percentile: 418 bp  50th percentile: 464 bp  75th percentile: 517 bp | ~330-430 bp (estimate based on gel extraction)  Average: ~400 bp (estimate based on Bioanalyzer) |
| **Selection of target regions** | DHS from adult mouse retina, brain, heart, and liver | DHS & TF ChIP-seq from mouse thymocytes |
| **Number of target regions** | 4,000 | 7,542 |
| **Size of target regions** | 300 bp centered on DHS | Variable (average 188 bp) |
| **Total target space** | 1.2 Mb | 1.4 Mb |
| **Capture design (Mamanova et al. 2010)** | In-solution hybridization | On-array (microarray hybridization) |
| **Capture conditions** | 2 rounds of capture (Lee et al. 2009)  Low salt concentration  Low bait concentration | 1 round of capture |
| **Post-capture PCR before cloning** | 14-16 cycles | 20 cycles |
| **Sequencing of captured-and-cloned fragments** | MiSeq, paired-end, 2x250 bp | Ion Torrent PGM, single reads, variable length  25th percentile: 152 bp  50th percentile: 257 bp  75th percentile: 283 bp |
| **Able to precisely map both ends of fragments?** | Yes | No |
| **Able to conduct truncation mutation analysis?** | Yes | No |
| **Alignment rate with Bowtie 2 to mm9** | 94% | 95% |
| **Reads that align to >1 places in mm9** | 0.4% | 40% |
| **On-target rate** | 98.5% (defined as fraction of fragments that overlap a 300 bp target region) | 14% (defined as fraction of reads that fall within a 1 kb window centered on a target) |
| **Proportion of targeted regions represented by captured fragments** | 3,483/4,000 (87%) | 7,152/7,542 (95%) |
| **Downstream application** | Electroporation into mouse retina *ex vivo*, and packaging into AAV for injection into cerebral cortex *in vivo* | Transfection into T cell line (P5424) and fibroblast cell line (3T3) |
