# Supplementary material for: Massively parallel cis-regulatory analysis in the mammalian central nervous system
Source: HighWire-hosted journal article supplement (doi:10.1101/gr.193789.115), 2015-11-17
Supplement: SuppTable9.docx [file SuppTable9.docx]

**Supplemental Table S9. Sequences of oligos, primers, and adapters.**

| **Name** | **Sequence (5’ 🡪 3’)** | **Comment** |
| --- | --- | --- |
| Ill_NotI_1XL | TCAGTCACGATGCGGCCGC**TACACGACGCTCTTCCGATCT** | Creates NotI site and recognizes adapter |
| Ill_NotI_2XL | TCAGTCACGATGCGGCCGC**AGACGTGTGCTCTTCCGATCT** | Creates NotI site and recognizes adapter |
| BC_F | CGCGCCACGTCCCNNNNNNNNNNNNNNNAAACCGCATGCA | When annealed, creates AscI and NsiI overhangs |
| BC_R | TGCGGTTTNNNNNNNNNNNNNNNGGGACGTGG |
| 5’ Tak | GCAAAAACAGGAAGGCAAAA |  |
| NotI_polyA_R1 | TCAGTCACGATGCGGCCGCATGACCATGATTACGCCAAG | Creates NotI site |
| LibPCR_F | CTCATGAGCGGATACATATTTGA |  |
| LibPCR_R | GATTACACCGCGGCTGCACCTGAGGAGTATGCAT | Creates SacII site |
| P1_NotI_5F | AATGATACGGCGACCACCGAGATCTACACTCTTTCCCTACACGACGCTCTTCCGATCT**GCTCGA**GC | When annealed, creates NotI overhang; index is GCTCGA |
| P1_NotI_5R | GGCCGCTCGAGCAGATCGGAAGAGCGTCGTGTAGGGAAAGAGTGTAGATCTCGGTGGTCGCCGTATCATT |
| P1_NotI_6F | AATGATACGGCGACCACCGAGATCTACACTCTTTCCCTACACGACGCTCTTCCGATCT**TAGACTA**GC | When annealed, creates NotI overhang; index is TAGACTA |
| P1_NotI_6R | GGCCGCTAGTCTAAGATCGGAAGAGCGTCGTGTAGGGAAAGAGTGTAGATCTCGGTGGTCGCCGTATCATT |
| P1_NotI_10F | AATGATACGGCGACCACCGAGATCTACACTCTTTCCCTACACGACGCTCTTCCGATCT**CGCTACCC**GC | When annealed, creates NotI overhang; index is CGCTACCC |
| P1_NotI_10R | GGCCGCGGGTAGCGAGATCGGAAGAGCGTCGTGTAGGGAAAGAGTGTAGATCTCGGTGGTCGCCGTATCATT |
| P1_NotI_11F | AATGATACGGCGACCACCGAGATCTACACTCTTTCCCTACACGACGCTCTTCCGATCT**ATAGTGGACA**GC | When annealed, creates NotI overhang; index is ATAGTGGACA |
| P1_NotI_11R | GGCCGCTGTCCACTATAGATCGGAAGAGCGTCGTGTAGGGAAAGAGTGTAGATCTCGGTGGTCGCCGTATCATT |
| PE2_SacII_F | GGAGATCGGAAGAGCGGTTCAGCAGGAATGCCGAGACCGATCTCGTATGCCGTCTTCTGCTTG | When annealed, creates SacII overhang |
| PE2_SacII_R | CAAGCAGAAGACGGCATACGAGATCGGTCTCGGCATTCCTGCTGAACCGCTCTTCCGATCTCCGC |
| SSP1F | CAAGTAAAGGCGGCCGACGTC | Creates EagI site |
| JKP3R (Kwasnieski et al. 2012) | GAATTCTAGCCAGAAGTCAGATGCTCAAG | Creates EcoRI site |
| JKP4F (Kwasnieski et al. 2012) | AATGATACGGCGACCACCGAG | Recognizes P1 |
| JKP4R (Kwasnieski et al. 2012) | CAAGCAGAAGACGGCATACGA | Recognizes PE2 |
| P1_EagI_6F | AATGATACGGCGACCACCGAGATCTACACTCTTTCCCTACACGACGCTCTTCCGATCT**CGCTAC** | When annealed, creates EagI overhang; index is CGCTAG |
| P1_EagI_6R | GGCCGTAGCGAGATCGGAAGAGCGTCGTGTAGGGAAAGAGTGTAGATCTCGGTGGTCGCCGTATCATT |
| P1_EagI_7F | AATGATACGGCGACCACCGAGATCTACACTCTTTCCCTACACGACGCTCTTCCGATCT**GCTCGAT** | When annealed, creates EagI overhang; index is GCTCGAT |
| P1_EagI_7R | GGCCATCGAGCAGATCGGAAGAGCGTCGTGTAGGGAAAGAGTGTAGATCTCGGTGGTCGCCGTATCATT |
| P1_EagI_8F | AATGATACGGCGACCACCGAGATCTACACTCTTTCCCTACACGACGCTCTTCCGATCT**TAGACTAT** | When annealed, creates EagI overhang; index is TAGACTAT |
| P1_EagI_8R | GGCCATAGTCTAAGATCGGAAGAGCGTCGTGTAGGGAAAGAGTGTAGATCTCGGTGGTCGCCGTATCATT |
| P1_EagI_9F | AATGATACGGCGACCACCGAGATCTACACTCTTTCCCTACACGACGCTCTTCCGATCT**GATCGTCAT** | When annealed, creates EagI overhang; index is GATCGTCAT |
| P1_EagI_9R | GGCCATGACGATCAGATCGGAAGAGCGTCGTGTAGGGAAAGAGTGTAGATCTCGGTGGTCGCCGTATCATT |
| P1_EagI_10F | AATGATACGGCGACCACCGAGATCTACACTCTTTCCCTACACGACGCTCTTCCGATCT**ATAGTGGACA** | When annealed, creates EagI overhang; index is ATAGTGGACA |
| P1_EagI_10R | GGCCTGTCCACTATAGATCGGAAGAGCGTCGTGTAGGGAAAGAGTGTAGATCTCGGTGGTCGCCGTATCATT |
| P1_EagI_11F | AATGATACGGCGACCACCGAGATCTACACTCTTTCCCTACACGACGCTCTTCCGATCT**TCAGACTCAGT** | When annealed, creates EagI overhang; index is TCAGACTCAGT |
| P1_EagI_11R | GGCCACTGAGTCTGAAGATCGGAAGAGCGTCGTGTAGGGAAAGAGTGTAGATCTCGGTGGTCGCCGTATCATT |
| PE2_EcoRI_F | AATTAACCTCAAGATCGGAAGAGCGGTTCAGCAGGAATGCCGAGACCGATCTCGTATGCCGTCTTCTGCTTG | When annealed, creates EcoRI overhang |
| PE2_EcoRI_R | CAAGCAGAAGACGGCATACGAGATCGGTCTCGGCATTCCTGCTGAACCGCTCTTCCGATCTTGAGGTT |
| R28_MT | GCTTAAGATATCTTAGGATAGGTCATCCCACCTCAGCTGCCTA**C**TCTAGATA**C**TCCCTCACAGACATGCATGGAGATTTGTTTCCATGGTGACCCTAAATCCTGTCAAGACAATCAATATTAACCACACGCCCAACTGATTAAAATCCACAGAGCCTGCCAGCCCTCTCCTGAGACATAAGTACTACAAAGTATGGTTTGGACAGTAGCCGACAAGATCACAGCCATTCAACCTTACCACAGAACCCCATGAGGGGCCCCCAATTTCCTTGGTATCGTCTGGTGACCATGAAGGGATCCGCTAGAGTTTCTAATACATACTTGGTGGTCTGAGCAGGGAAGTTACAGAAAGGTCTCTGAAGACAACTGTGGCCATAACTTACGGCTTTAGCAGCAGCCAATCCATACCCAGGGTGAGGCCCAGACAAGATCCAGGTGGCATTGCTCGCTTGCTGTTTCTAGTTATCATTGCTTGGTGGGACCTTGAAAGGGAGAGGCGCAGAGGGGACTCCAACACCAGCTCCCTTGCCACATGATAAGATCAAGGTACCAATTG | Gene block for cloning as EcoRV/KpnI fragment; creates point mutations in two predicted CRX sites |
| R62_MT | TCCCCGGAATTCCCTTTTGCTGGCCTCTGAGTCAGCAGGGGCAGTGGGGATTTGTGAGCAGC**G**TAGAGTA**C**TCGGGCAGTCAGTGCAATCAGCAGTCCCTCCCTACACCCTCCAGAAAACTAGCTGCCATCTGCTGCTTTTGCATTTCCCTCCACCTCTGGACAGTGTGATAAACTTATTACCTAGTCCAAAACACAAACAACAAGACAGTATTTACCAAAATAAGGCAGCGGTACCTTGAAGACGCTGGTTGCTGCACAGCTCTGCCCCGCCCCATACTTCCCTGACAAGTCCATAACCTTGTTTCCAGTGTACAGAGTAGGCTTTCCTGGGGTGGTGGGATAGCTTAGTGGAAAGAGCTCACGATACGAGCATGAGGACCCGAGTTCAGATCCCAGCACCACATACAAATCAGGCTGTGGCAGAAAGCGTCTGGAATCTCAGGAGTCAGGACAGGAGGTCCCTGGAGCTCACTGGTCATTCGGTCTAGCCCAGCTGACCTCCAGGTTCAGCAAGAGACCTTAGCTCAAAAACATAAGTGGAGAGTAACTGAGTAAGATAGCCAAGATATCCAGTATTGACCTCTGGCCTCCATATGCATGCACACACAGAGGGACAGGTACAAATGCACCATGCGTGTCTAGACCGATG | Gene block for cloning as EcoRI/XbaI fragment; creates point mutations in two predicted CRX sites |
| R28_L | GCTTAAGATATCTTAGGATAGGTCATCCCACCTCA | Used with R28_R to clone as EcoRV/KpnI fragment |
| R28_S | GCTTAAGATATCTTGTTTCCATGGTGACCCTA | Used with R28_R to clone as EcoRV/KpnI fragment |
| R28_R | CAATTGGTACCTTGATCTTATCATGTGGCAAGG |  |
| R62_L | TCCCCGGAATTCCCTTTTGCTGGCCTCTGAGT | Used with R62_R to clone as EcoRI/XbaI fragment |
| R62_S | TCCCCGGAATTCGTCAGTGCAATCAGCAGTCC | Used with R62_R to clone as EcoRI/XbaI fragment |
| R62_R | CATCGGTCTAGACACGCATGGTGCATTTGTA |  |
| R64_L | GCTTAAGATATCCGTGTGCTGAGGATTAGAGGA | Used with R64_R to clone as EcoRV/KpnI fragment |
| R64_MT | CGTTAAGATATCCGTGTGCTGAGGA**G**TAGAGGA | Creates point mutation in predicted CRX site; used with R64_R to clone as EcoRV/KpnI fragment |
| R64_S | GCTTAAGATATCCCGCTACAGAGCCTGTAATCC | Used with R64_R to clone as EcoRV/KpnI fragment |
| R64_R | CAATTGGTACCCAGCACAGGATTCGAGTGGTT |  |
