# Supplementary material for: Massively parallel cis-regulatory analysis in the mammalian central nervous system
Source: HighWire-hosted journal article supplement (doi:10.1101/gr.193789.115), 2015-11-17
Supplement: SuppTable10_browser_tracks.xlsx [file SuppTable10_browser_tracks.xlsx]

## Sheet: 4000targets
track name="4000_DHS_targets" description="8wk_DNaseI-seq_targets" itemRgb="On" visibility=full
chr18	74091565	74091865	B1	0	.	74091565	74091565	0,0,250
chr16	37443005	37443305	B10	0	.	37443005	37443005	0,0,250
chr9	44893865	44894165	B100	0	.	44893865	44893865	0,0,250
chr6	103508885	103509185	B1000	0	.	103508885	103508885	0,0,250
chr4	53528825	53529125	B101	0	.	53528825	53528825	0,0,250
chr4	147735085	147735385	B102	0	.	147735085	147735085	0,0,250
chr2	57991125	57991425	B103	0	.	57991125	57991125	0,0,250
chr6	28481305	28481605	B104	0	.	28481305	28481305	0,0,250
chr12	85792225	85792525	B105	0	.	85792225	85792225	0,0,250
chr15	79993725	79994025	B106	0	.	79993725	79993725	0,0,250
chr3	136772825	136773125	B107	0	.	136772825	136772825	0,0,250
chr1	179538865	179539165	B108	0	.	179538865	179538865	0,0,250
chr8	15006585	15006885	B109	0	.	15006585	15006585	0,0,250
chr2	129370765	129371065	B11	0	.	129370765	129370765	0,0,250
chr7	134942105	134942405	B110	0	.	134942105	134942105	0,0,250
chr14	49527085	49527385	B111	0	.	49527085	49527085	0,0,250
chr19	6267305	6267605	B112	0	.	6267305	6267305	0,0,250
chr2	136568025	136568325	B113	0	.	136568025	136568025	0,0,250
chr4	33988705	33989005	B114	0	.	33988705	33988705	0,0,250
chr9	64406005	64406305	B115	0	.	64406005	64406005	0,0,250
chr13	102257625	102257925	B116	0	.	102257625	102257625	0,0,250
chr17	27636045	27636345	B117	0	.	27636045	27636045	0,0,250
chr11	6852865	6853165	B118	0	.	6852865	6852865	0,0,250
chr18	84119585	84119885	B119	0	.	84119585	84119585	0,0,250
chr5	121539765	121540065	B12	0	.	121539765	121539765	0,0,250
chr4	67183345	67183645	B120	0	.	67183345	67183345	0,0,250
chr17	33643605	33643905	B121	0	.	33643605	33643605	0,0,250
chr6	124408565	124408865	B122	0	.	124408565	124408565	0,0,250
chr5	114133265	114133565	B123	0	.	114133265	114133265	0,0,250
chr7	152521605	152521905	B124	0	.	152521605	152521605	0,0,250
chr1	160240625	160240925	B125	0	.	160240625	160240625	0,0,250
chr7	119347445	119347745	B126	0	.	119347445	119347445	0,0,250
chr10	3268665	3268965	B127	0	.	3268665	3268665	0,0,250
chr10	127720705	127721005	B128	0	.	127720705	127720705	0,0,250
chr4	8818725	8819025	B129	0	.	8818725	8818725	0,0,250
chr12	91664145	91664445	B13	0	.	91664145	91664145	0,0,250
chr1	48790465	48790765	B130	0	.	48790465	48790465	0,0,250
chr6	71475605	71475905	B131	0	.	71475605	71475605	0,0,250
chr16	22797545	22797845	B132	0	.	22797545	22797545	0,0,250
chr15	39654645	39654945	B133	0	.	39654645	39654645	0,0,250
chr2	141646585	141646885	B134	0	.	141646585	141646585	0,0,250
chr5	115203425	115203725	B135	0	.	115203425	115203425	0,0,250
chr7	114543685	114543985	B136	0	.	114543685	114543685	0,0,250
chr4	33977025	33977325	B137	0	.	33977025	33977025	0,0,250
chr15	23387225	23387525	B138	0	.	23387225	23387225	0,0,250
chr17	88170185	88170485	B139	0	.	88170185	88170185	0,0,250
chr6	90749145	90749445	B14	0	.	90749145	90749145	0,0,250
chr6	73336305	73336605	B140	0	.	73336305	73336305	0,0,250
chr1	133207025	133207325	B141	0	.	133207025	133207025	0,0,250
chr1	94775905	94776205	B142	0	.	94775905	94775905	0,0,250
chr6	91309705	91310005	B143	0	.	91309705	91309705	0,0,250
chr1	51300145	51300445	B144	0	.	51300145	51300145	0,0,250
chr18	33128045	33128345	B145	0	.	33128045	33128045	0,0,250
chr2	21265465	21265765	B146	0	.	21265465	21265465	0,0,250
chr15	99432225	99432525	B147	0	.	99432225	99432225	0,0,250
chr4	58187485	58187785	B148	0	.	58187485	58187485	0,0,250
chr2	167297145	167297445	B149	0	.	167297145	167297145	0,0,250
chr10	65644045	65644345	B15	0	.	65644045	65644045	0,0,250
chr4	128565085	128565385	B150	0	.	128565085	128565085	0,0,250
chr7	121171005	121171305	B151	0	.	121171005	121171005	0,0,250
chr3	123676785	123677085	B152	0	.	123676785	123676785	0,0,250
chr18	57833425	57833725	B153	0	.	57833425	57833425	0,0,250
chr7	53799785	53800085	B154	0	.	53799785	53799785	0,0,250
chr10	114327805	114328105	B155	0	.	114327805	114327805	0,0,250
chr4	45768785	45769085	B156	0	.	45768785	45768785	0,0,250
chr7	16689105	16689405	B157	0	.	16689105	16689105	0,0,250
chr18	39550645	39550945	B158	0	.	39550645	39550645	0,0,250
chr17	66582125	66582425	B159	0	.	66582125	66582125	0,0,250
chr8	36996605	36996905	B16	0	.	36996605	36996605	0,0,250
chr4	154526645	154526945	B160	0	.	154526645	154526645	0,0,250
chr6	59278345	59278645	B161	0	.	59278345	59278345	0,0,250
chr9	41006585	41006885	B162	0	.	41006585	41006585	0,0,250
chr12	83488745	83489045	B163	0	.	83488745	83488745	0,0,250
chr10	98003745	98004045	B164	0	.	98003745	98003745	0,0,250
chr2	65496525	65496825	B165	0	.	65496525	65496525	0,0,250
chr18	73294625	73294925	B166	0	.	73294625	73294625	0,0,250
chr7	146280705	146281005	B167	0	.	146280705	146280705	0,0,250
chr17	30661405	30661705	B168	0	.	30661405	30661405	0,0,250
chr5	68541225	68541525	B169	0	.	68541225	68541225	0,0,250
chr7	70653045	70653345	B17	0	.	70653045	70653045	0,0,250
chr1	28271125	28271425	B170	0	.	28271125	28271125	0,0,250
chr1	190889405	190889705	B171	0	.	190889405	190889405	0,0,250
chr10	89833525	89833825	B172	0	.	89833525	89833525	0,0,250
chr8	86950525	86950825	B173	0	.	86950525	86950525	0,0,250
chr11	119719405	119719705	B174	0	.	119719405	119719405	0,0,250
chr5	134416765	134417065	B175	0	.	134416765	134416765	0,0,250
chr19	22958845	22959145	B176	0	.	22958845	22958845	0,0,250
chr3	139806925	139807225	B177	0	.	139806925	139806925	0,0,250
chr16	96471265	96471565	B178	0	.	96471265	96471265	0,0,250
chr9	29050645	29050945	B179	0	.	29050645	29050645	0,0,250
chr5	114128785	114129085	B18	0	.	114128785	114128785	0,0,250
chr1	59433465	59433765	B180	0	.	59433465	59433465	0,0,250
chr12	81884985	81885285	B181	0	.	81884985	81884985	0,0,250
chr3	82210265	82210565	B182	0	.	82210265	82210265	0,0,250
chr3	114632565	114632865	B183	0	.	114632565	114632565	0,0,250
chr11	6789605	6789905	B184	0	.	6789605	6789605	0,0,250
chr5	131177685	131177985	B185	0	.	131177685	131177685	0,0,250
chr2	156700565	156700865	B186	0	.	156700565	156700565	0,0,250
chr11	32522205	32522505	B187	0	.	32522205	32522205	0,0,250
chr12	90941425	90941725	B188	0	.	90941425	90941425	0,0,250
chr7	57497285	57497585	B189	0	.	57497285	57497285	0,0,250
chr8	116782645	116782945	B19	0	.	116782645	116782645	0,0,250
chr8	89821305	89821605	B190	0	.	89821305	89821305	0,0,250
chr9	34709525	34709825	B191	0	.	34709525	34709525	0,0,250
chr14	16925325	16925625	B192	0	.	16925325	16925325	0,0,250
chr7	109518245	109518545	B193	0	.	109518245	109518245	0,0,250
chr12	110260545	110260845	B194	0	.	110260545	110260545	0,0,250
chr13	105752905	105753205	B195	0	.	105752905	105752905	0,0,250
chr17	88906765	88907065	B196	0	.	88906765	88906765	0,0,250
chr2	29786105	29786405	B197	0	.	29786105	29786105	0,0,250
chr8	124223905	124224205	B198	0	.	124223905	124223905	0,0,250
chr12	26876605	26876905	B199	0	.	26876605	26876605	0,0,250
chr14	123285145	123285445	B2	0	.	123285145	123285145	0,0,250
chr5	34612085	34612385	B20	0	.	34612085	34612085	0,0,250
chr8	128559005	128559305	B200	0	.	128559005	128559005	0,0,250
chr11	84774345	84774645	B201	0	.	84774345	84774345	0,0,250
chr18	61469385	61469685	B202	0	.	61469385	61469385	0,0,250
chr1	24668445	24668745	B203	0	.	24668445	24668445	0,0,250
chr2	170636885	170637185	B204	0	.	170636885	170636885	0,0,250
chr5	74648945	74649245	B205	0	.	74648945	74648945	0,0,250
chr4	139045845	139046145	B206	0	.	139045845	139045845	0,0,250
chr6	24183705	24184005	B207	0	.	24183705	24183705	0,0,250
chr6	88750765	88751065	B208	0	.	88750765	88750765	0,0,250
chr8	117015665	117015965	B209	0	.	117015665	117015665	0,0,250
chr7	90883985	90884285	B21	0	.	90883985	90883985	0,0,250
chr1	153910965	153911265	B210	0	.	153910965	153910965	0,0,250
chr4	101779445	101779745	B211	0	.	101779445	101779445	0,0,250
chr1	178127225	178127525	B212	0	.	178127225	178127225	0,0,250
chr11	114910885	114911185	B213	0	.	114910885	114910885	0,0,250
chr12	40043845	40044145	B214	0	.	40043845	40043845	0,0,250
chr14	52680505	52680805	B215	0	.	52680505	52680505	0,0,250
chr7	30178365	30178665	B216	0	.	30178365	30178365	0,0,250
chr17	11350465	11350765	B217	0	.	11350465	11350465	0,0,250
chr8	128536285	128536585	B218	0	.	128536285	128536285	0,0,250
chr3	99906665	99906965	B219	0	.	99906665	99906665	0,0,250
chr1	154847685	154847985	B22	0	.	154847685	154847685	0,0,250
chr5	135654925	135655225	B220	0	.	135654925	135654925	0,0,250
chr8	128483425	128483725	B221	0	.	128483425	128483425	0,0,250
chr4	98301805	98302105	B222	0	.	98301805	98301805	0,0,250
chr7	140084105	140084405	B223	0	.	140084105	140084105	0,0,250
chr13	57907685	57907985	B224	0	.	57907685	57907685	0,0,250
chr14	122017285	122017585	B225	0	.	122017285	122017285	0,0,250
chr11	113517945	113518245	B226	0	.	113517945	113517945	0,0,250
chr17	74180805	74181105	B227	0	.	74180805	74180805	0,0,250
chr7	99609125	99609425	B228	0	.	99609125	99609125	0,0,250
chr9	112163245	112163545	B229	0	.	112163245	112163245	0,0,250
chr12	26890955	26891255	B23	0	.	26890955	26890955	0,0,250
chr7	116183005	116183305	B230	0	.	116183005	116183005	0,0,250
chr12	88301125	88301425	B231	0	.	88301125	88301125	0,0,250
chr8	116775185	116775485	B232	0	.	116775185	116775185	0,0,250
chr2	156059405	156059705	B233	0	.	156059405	156059405	0,0,250
chr9	34712765	34713065	B234	0	.	34712765	34712765	0,0,250
chr12	39775065	39775365	B235	0	.	39775065	39775065	0,0,250
chr18	64935085	64935385	B236	0	.	64935085	64935085	0,0,250
chr9	62319645	62319945	B237	0	.	62319645	62319645	0,0,250
chr1	134466185	134466485	B238	0	.	134466185	134466185	0,0,250
chr12	91380445	91380745	B239	0	.	91380445	91380445	0,0,250
chr2	90664005	90664305	B24	0	.	90664005	90664005	0,0,250
chr13	46430425	46430725	B240	0	.	46430425	46430425	0,0,250
chr13	58125465	58125765	B241	0	.	58125465	58125465	0,0,250
chr2	3519945	3520245	B242	0	.	3519945	3519945	0,0,250
chr3	85197365	85197665	B243	0	.	85197365	85197365	0,0,250
chr11	118752925	118753225	B244	0	.	118752925	118752925	0,0,250
chr3	99910725	99911025	B245	0	.	99910725	99910725	0,0,250
chr5	27707565	27707865	B246	0	.	27707565	27707565	0,0,250
chr7	90899585	90899885	B247	0	.	90899585	90899585	0,0,250
chr1	17050665	17050965	B248	0	.	17050665	17050665	0,0,250
chr7	74232685	74232985	B249	0	.	74232685	74232685	0,0,250
chr15	72191105	72191405	B25	0	.	72191105	72191105	0,0,250
chr3	114665285	114665585	B250	0	.	114665285	114665285	0,0,250
chr18	13865725	13866025	B251	0	.	13865725	13865725	0,0,250
chr16	9751145	9751445	B252	0	.	9751145	9751145	0,0,250
chr2	71859905	71860205	B253	0	.	71859905	71859905	0,0,250
chr3	109661245	109661545	B254	0	.	109661245	109661245	0,0,250
chr3	106975505	106975805	B255	0	.	106975505	106975505	0,0,250
chr9	91911385	91911685	B256	0	.	91911385	91911385	0,0,250
chr1	75569405	75569705	B257	0	.	75569405	75569405	0,0,250
chr16	10005725	10006025	B258	0	.	10005725	10005725	0,0,250
chr17	88820645	88820945	B259	0	.	88820645	88820645	0,0,250
chr4	75112985	75113285	B26	0	.	75112985	75112985	0,0,250
chr10	13555925	13556225	B260	0	.	13555925	13555925	0,0,250
chr3	105279365	105279665	B261	0	.	105279365	105279365	0,0,250
chr6	103624365	103624665	B262	0	.	103624365	103624365	0,0,250
chr10	126390125	126390425	B263	0	.	126390125	126390125	0,0,250
chr13	111994825	111995125	B264	0	.	111994825	111994825	0,0,250
chr5	110991725	110992025	B265	0	.	110991725	110991725	0,0,250
chr16	92975385	92975685	B266	0	.	92975385	92975385	0,0,250
chr1	6810025	6810325	B267	0	.	6810025	6810025	0,0,250
chr2	52068165	52068465	B268	0	.	52068165	52068165	0,0,250
chr11	101049465	101049765	B269	0	.	101049465	101049465	0,0,250
chr16	49980325	49980625	B27	0	.	49980325	49980325	0,0,250
chr7	74633065	74633365	B270	0	.	74633065	74633065	0,0,250
chr10	114351065	114351365	B271	0	.	114351065	114351065	0,0,250
chr12	83205245	83205545	B272	0	.	83205245	83205245	0,0,250
chr4	6352545	6352845	B273	0	.	6352545	6352545	0,0,250
chr4	128821825	128822125	B274	0	.	128821825	128821825	0,0,250
chr5	8095765	8096065	B275	0	.	8095765	8095765	0,0,250
chr1	179522525	179522825	B276	0	.	179522525	179522525	0,0,250
chr2	41838025	41838325	B277	0	.	41838025	41838025	0,0,250
chr6	126519885	126520185	B278	0	.	126519885	126519885	0,0,250
chr11	33236885	33237185	B279	0	.	33236885	33236885	0,0,250
chr1	65595465	65595765	B28	0	.	65595465	65595465	0,0,250
chr19	24598005	24598305	B280	0	.	24598005	24598005	0,0,250
chr15	40193805	40194105	B281	0	.	40193805	40193805	0,0,250
chr1	190888525	190888825	B282	0	.	190888525	190888525	0,0,250
chr14	70938645	70938945	B283	0	.	70938645	70938645	0,0,250
chr18	77473745	77474045	B284	0	.	77473745	77473745	0,0,250
chr1	134434385	134434685	B285	0	.	134434385	134434385	0,0,250
chr13	118729365	118729665	B286	0	.	118729365	118729365	0,0,250
chr16	48372605	48372905	B287	0	.	48372605	48372605	0,0,250
chr12	107258345	107258645	B288	0	.	107258345	107258345	0,0,250
chr10	41838725	41839025	B289	0	.	41838725	41838725	0,0,250
chr6	19232985	19233285	B29	0	.	19232985	19232985	0,0,250
chr2	79283025	79283325	B290	0	.	79283025	79283025	0,0,250
chr6	54029905	54030205	B291	0	.	54029905	54029905	0,0,250
chr3	101611625	101611925	B292	0	.	101611625	101611625	0,0,250
chr9	70513205	70513505	B293	0	.	70513205	70513205	0,0,250
chr14	64792185	64792485	B294	0	.	64792185	64792185	0,0,250
chr4	120563725	120564025	B295	0	.	120563725	120563725	0,0,250
chr6	50606045	50606345	B296	0	.	50606045	50606045	0,0,250
chr6	71947225	71947525	B297	0	.	71947225	71947225	0,0,250
chr2	25437505	25437805	B298	0	.	25437505	25437505	0,0,250
chr8	56128345	56128645	B299	0	.	56128345	56128345	0,0,250
chr3	8561705	8562005	B3	0	.	8561705	8561705	0,0,250
chr1	64388205	64388505	B30	0	.	64388205	64388205	0,0,250
chr12	29826045	29826345	B300	0	.	29826045	29826045	0,0,250
chr16	40228805	40229105	B301	0	.	40228805	40228805	0,0,250
chr17	88271705	88272005	B302	0	.	88271705	88271705	0,0,250
chr2	77635365	77635665	B303	0	.	77635365	77635365	0,0,250
chr19	6549605	6549905	B304	0	.	6549605	6549605	0,0,250
chr10	4877565	4877865	B305	0	.	4877565	4877565	0,0,250
chr2	21012945	21013245	B306	0	.	21012945	21012945	0,0,250
chr2	90690605	90690905	B307	0	.	90690605	90690605	0,0,250
chr1	156708565	156708865	B308	0	.	156708565	156708565	0,0,250
chr18	44680125	44680425	B309	0	.	44680125	44680125	0,0,250
chr11	118744525	118744825	B31	0	.	118744525	118744525	0,0,250
chr6	118703885	118704185	B310	0	.	118703885	118703885	0,0,250
chr7	82474665	82474965	B311	0	.	82474665	82474665	0,0,250
chr19	57324305	57324605	B312	0	.	57324305	57324305	0,0,250
chr4	134014845	134015145	B313	0	.	134014845	134014845	0,0,250
chr1	83273665	83273965	B314	0	.	83273665	83273665	0,0,250
chr4	154770885	154771185	B315	0	.	154770885	154770885	0,0,250
chr7	53813345	53813645	B316	0	.	53813345	53813345	0,0,250
chr9	97957785	97958085	B317	0	.	97957785	97957785	0,0,250
chr15	71981085	71981385	B318	0	.	71981085	71981085	0,0,250
chr3	101494225	101494525	B319	0	.	101494225	101494225	0,0,250
chr4	59838525	59838825	B32	0	.	59838525	59838525	0,0,250
chr8	60441565	60441865	B320	0	.	60441565	60441565	0,0,250
chr17	64065525	64065825	B321	0	.	64065525	64065525	0,0,250
chr2	138618845	138619145	B322	0	.	138618845	138618845	0,0,250
chr7	139870885	139871185	B323	0	.	139870885	139870885	0,0,250
chr19	9186605	9186905	B324	0	.	9186605	9186605	0,0,250
chr4	47992505	47992805	B325	0	.	47992505	47992505	0,0,250
chr4	82879065	82879365	B326	0	.	82879065	82879065	0,0,250
chr9	30090725	30091025	B327	0	.	30090725	30090725	0,0,250
chr12	113829085	113829385	B328	0	.	113829085	113829085	0,0,250
chr15	80453925	80454225	B329	0	.	80453925	80453925	0,0,250
chr5	114178065	114178365	B33	0	.	114178065	114178065	0,0,250
chr7	51881065	51881365	B330	0	.	51881065	51881065	0,0,250
chr12	26556025	26556325	B331	0	.	26556025	26556025	0,0,250
chr17	78804725	78805025	B332	0	.	78804725	78804725	0,0,250
chr18	64327005	64327305	B333	0	.	64327005	64327005	0,0,250
chr10	114456505	114456805	B334	0	.	114456505	114456505	0,0,250
chr9	75275125	75275425	B335	0	.	75275125	75275125	0,0,250
chr11	93351845	93352145	B336	0	.	93351845	93351845	0,0,250
chr16	95981145	95981445	B337	0	.	95981145	95981145	0,0,250
chr2	155620885	155621185	B338	0	.	155620885	155620885	0,0,250
chr4	142446505	142446805	B339	0	.	142446505	142446505	0,0,250
chr8	66631025	66631325	B34	0	.	66631025	66631025	0,0,250
chr8	128530345	128530645	B340	0	.	128530345	128530345	0,0,250
chr11	55170345	55170645	B341	0	.	55170345	55170345	0,0,250
chr4	9034425	9034725	B342	0	.	9034425	9034425	0,0,250
chr8	14748805	14749105	B343	0	.	14748805	14748805	0,0,250
chr12	112480185	112480485	B344	0	.	112480185	112480185	0,0,250
chr7	118731965	118732265	B345	0	.	118731965	118731965	0,0,250
chr16	17852005	17852305	B346	0	.	17852005	17852005	0,0,250
chr16	18124185	18124485	B347	0	.	18124185	18124185	0,0,250
chr5	53552765	53553065	B348	0	.	53552765	53552765	0,0,250
chr6	53996385	53996685	B349	0	.	53996385	53996385	0,0,250
chr14	16925745	16926045	B35	0	.	16925745	16925745	0,0,250
chr10	116193305	116193605	B350	0	.	116193305	116193305	0,0,250
chr4	98321105	98321405	B351	0	.	98321105	98321105	0,0,250
chr6	144966865	144967165	B352	0	.	144966865	144966865	0,0,250
chr2	135664665	135664965	B353	0	.	135664665	135664665	0,0,250
chr14	58122585	58122885	B354	0	.	58122585	58122585	0,0,250
chr1	83244905	83245205	B355	0	.	83244905	83244905	0,0,250
chr2	119626685	119626985	B356	0	.	119626685	119626685	0,0,250
chr6	119028985	119029285	B357	0	.	119028985	119028985	0,0,250
chr8	125376165	125376465	B358	0	.	125376165	125376165	0,0,250
chr5	130876445	130876745	B359	0	.	130876445	130876445	0,0,250
chr2	65528585	65528885	B36	0	.	65528585	65528585	0,0,250
chr9	113086265	113086565	B360	0	.	113086265	113086265	0,0,250
chr11	113659365	113659665	B361	0	.	113659365	113659365	0,0,250
chr4	15523225	15523525	B362	0	.	15523225	15523225	0,0,250
chr5	116976345	116976645	B363	0	.	116976345	116976345	0,0,250
chr7	109086145	109086445	B364	0	.	109086145	109086145	0,0,250
chr13	19193885	19194185	B365	0	.	19193885	19193885	0,0,250
chr15	42156805	42157105	B366	0	.	42156805	42156805	0,0,250
chr6	111689025	111689325	B367	0	.	111689025	111689025	0,0,250
chr15	12145145	12145445	B368	0	.	12145145	12145145	0,0,250
chr15	88934905	88935205	B369	0	.	88934905	88934905	0,0,250
chr2	101747845	101748145	B37	0	.	101747845	101747845	0,0,250
chr4	81583365	81583665	B370	0	.	81583365	81583365	0,0,250
chr6	24056245	24056545	B371	0	.	24056245	24056245	0,0,250
chr11	18612825	18613125	B372	0	.	18612825	18612825	0,0,250
chr17	28960005	28960305	B373	0	.	28960005	28960005	0,0,250
chr2	17605325	17605625	B374	0	.	17605325	17605325	0,0,250
chr5	28564325	28564625	B375	0	.	28564325	28564325	0,0,250
chr8	14447345	14447645	B376	0	.	14447345	14447345	0,0,250
chr8	37022305	37022605	B377	0	.	37022305	37022305	0,0,250
chr11	101892505	101892805	B378	0	.	101892505	101892505	0,0,250
chr16	20824425	20824725	B379	0	.	20824425	20824425	0,0,250
chr5	114173625	114173925	B38	0	.	114173625	114173625	0,0,250
chr18	66320385	66320685	B380	0	.	66320385	66320385	0,0,250
chr1	179503525	179503825	B381	0	.	179503525	179503525	0,0,250
chr8	70372585	70372885	B382	0	.	70372585	70372585	0,0,250
chr9	91858945	91859245	B383	0	.	91858945	91858945	0,0,250
chr4	154466905	154467205	B384	0	.	154466905	154466905	0,0,250
chr12	80053485	80053785	B385	0	.	80053485	80053485	0,0,250
chr18	30554005	30554305	B386	0	.	30554005	30554005	0,0,250
chr2	32199585	32199885	B387	0	.	32199585	32199585	0,0,250
chr7	91193105	91193405	B388	0	.	91193105	91193105	0,0,250
chr7	103688165	103688465	B389	0	.	103688165	103688165	0,0,250
chr10	4841445	4841745	B39	0	.	4841445	4841445	0,0,250
chr2	58636025	58636325	B390	0	.	58636025	58636025	0,0,250
chr7	72755105	72755405	B391	0	.	72755105	72755105	0,0,250
chr8	37469825	37470125	B392	0	.	37469825	37469825	0,0,250
chr4	134550185	134550485	B393	0	.	134550185	134550185	0,0,250
chr5	132349025	132349325	B394	0	.	132349025	132349025	0,0,250
chr6	126149965	126150265	B395	0	.	126149965	126149965	0,0,250
chr7	112667905	112668205	B396	0	.	112667905	112667905	0,0,250
chr13	102177625	102177925	B397	0	.	102177625	102177625	0,0,250
chr12	72532145	72532445	B398	0	.	72532145	72532145	0,0,250
chr12	99545745	99546045	B399	0	.	99545745	99545745	0,0,250
chr3	136773465	136773765	B4	0	.	136773465	136773465	0,0,250
chr5	39262925	39263225	B40	0	.	39262925	39262925	0,0,250
chr13	54381385	54381685	B400	0	.	54381385	54381385	0,0,250
chr2	25289885	25290185	B401	0	.	25289885	25289885	0,0,250
chr5	117613845	117614145	B402	0	.	117613845	117613845	0,0,250
chr16	17642445	17642745	B403	0	.	17642445	17642445	0,0,250
chr3	126901665	126901965	B404	0	.	126901665	126901665	0,0,250
chr5	117013805	117014105	B405	0	.	117013805	117013805	0,0,250
chr7	82444125	82444425	B406	0	.	82444125	82444125	0,0,250
chr8	107990545	107990845	B407	0	.	107990545	107990545	0,0,250
chr8	126312365	126312665	B408	0	.	126312365	126312365	0,0,250
chr9	40862305	40862605	B409	0	.	40862305	40862305	0,0,250
chr11	115870985	115871285	B41	0	.	115870985	115870985	0,0,250
chr2	59439065	59439365	B410	0	.	59439065	59439065	0,0,250
chr8	113483885	113484185	B411	0	.	113483885	113483885	0,0,250
chr9	61141025	61141325	B412	0	.	61141025	61141025	0,0,250
chr16	76252105	76252405	B413	0	.	76252105	76252105	0,0,250
chr5	112797705	112798005	B414	0	.	112797705	112797705	0,0,250
chr5	117015645	117015945	B415	0	.	117015645	117015645	0,0,250
chr5	142615985	142616285	B416	0	.	142615985	142615985	0,0,250
chr3	121879645	121879945	B417	0	.	121879645	121879645	0,0,250
chr10	10430685	10430985	B418	0	.	10430685	10430685	0,0,250
chr11	61282165	61282465	B419	0	.	61282165	61282165	0,0,250
chr9	73775105	73775405	B42	0	.	73775105	73775105	0,0,250
chr12	81962965	81963265	B420	0	.	81962965	81962965	0,0,250
chr2	28268485	28268785	B421	0	.	28268485	28268485	0,0,250
chr7	81062925	81063225	B422	0	.	81062925	81062925	0,0,250
chr9	101062485	101062785	B423	0	.	101062485	101062485	0,0,250
chr18	79247785	79248085	B424	0	.	79247785	79247785	0,0,250
chr5	136962325	136962625	B425	0	.	136962325	136962325	0,0,250
chr6	85466005	85466305	B426	0	.	85466005	85466005	0,0,250
chr9	55193205	55193505	B427	0	.	55193205	55193205	0,0,250
chr9	103481845	103482145	B428	0	.	103481845	103481845	0,0,250
chr6	107394405	107394705	B429	0	.	107394405	107394405	0,0,250
chr11	55155485	55155785	B43	0	.	55155485	55155485	0,0,250
chr8	17465485	17465785	B430	0	.	17465485	17465485	0,0,250
chr12	70495505	70495805	B431	0	.	70495505	70495505	0,0,250
chr19	53504885	53505185	B432	0	.	53504885	53504885	0,0,250
chr9	40139945	40140245	B433	0	.	40139945	40139945	0,0,250
chr12	102105325	102105625	B434	0	.	102105325	102105325	0,0,250
chr2	29561145	29561445	B435	0	.	29561145	29561145	0,0,250
chr3	156748225	156748525	B436	0	.	156748225	156748225	0,0,250
chr9	101512685	101512985	B437	0	.	101512685	101512685	0,0,250
chr1	111829305	111829605	B438	0	.	111829305	111829305	0,0,250
chr2	30962165	30962465	B439	0	.	30962165	30962165	0,0,250
chr11	119384165	119384465	B44	0	.	119384165	119384165	0,0,250
chr6	117963585	117963885	B440	0	.	117963585	117963585	0,0,250
chr7	140660005	140660305	B441	0	.	140660005	140660005	0,0,250
chr10	84426545	84426845	B442	0	.	84426545	84426545	0,0,250
chr4	154673005	154673305	B443	0	.	154673005	154673005	0,0,250
chr12	41190985	41191285	B444	0	.	41190985	41190985	0,0,250
chr13	46955285	46955585	B445	0	.	46955285	46955285	0,0,250
chr16	95286025	95286325	B446	0	.	95286025	95286025	0,0,250
chr2	124466925	124467225	B447	0	.	124466925	124466925	0,0,250
chr4	33880445	33880745	B448	0	.	33880445	33880445	0,0,250
chr9	94173745	94174045	B449	0	.	94173745	94173745	0,0,250
chr8	89752725	89753025	B45	0	.	89752725	89752725	0,0,250
chr12	40068485	40068785	B450	0	.	40068485	40068485	0,0,250
chr4	87842045	87842345	B451	0	.	87842045	87842045	0,0,250
chr1	89382985	89383285	B452	0	.	89382985	89382985	0,0,250
chr11	17663465	17663765	B453	0	.	17663465	17663465	0,0,250
chr15	86594125	86594425	B454	0	.	86594125	86594125	0,0,250
chr6	17607365	17607665	B455	0	.	17607365	17607365	0,0,250
chr7	99464905	99465205	B456	0	.	99464905	99464905	0,0,250
chr10	83083165	83083465	B457	0	.	83083165	83083165	0,0,250
chr11	35117725	35118025	B458	0	.	35117725	35117725	0,0,250
chr5	89484745	89485045	B459	0	.	89484745	89484745	0,0,250
chr5	21992725	21993025	B46	0	.	21992725	21992725	0,0,250
chr6	126312405	126312705	B460	0	.	126312405	126312405	0,0,250
chr15	23496685	23496985	B461	0	.	23496685	23496685	0,0,250
chr7	107095845	107096145	B462	0	.	107095845	107095845	0,0,250
chr10	89374685	89374985	B463	0	.	89374685	89374685	0,0,250
chr14	124935385	124935685	B464	0	.	124935385	124935385	0,0,250
chr18	64911085	64911385	B465	0	.	64911085	64911085	0,0,250
chr8	36987145	36987445	B466	0	.	36987145	36987145	0,0,250
chr1	136193885	136194185	B467	0	.	136193885	136193885	0,0,250
chr5	26890625	26890925	B468	0	.	26890625	26890625	0,0,250
chr5	37284565	37284865	B469	0	.	37284565	37284565	0,0,250
chr10	49857665	49857965	B47	0	.	49857665	49857665	0,0,250
chr10	37627585	37627885	B470	0	.	37627585	37627585	0,0,250
chr11	93078825	93079125	B471	0	.	93078825	93078825	0,0,250
chr16	24194105	24194405	B472	0	.	24194105	24194105	0,0,250
chr4	128758345	128758645	B473	0	.	128758345	128758345	0,0,250
chr10	125958065	125958365	B474	0	.	125958065	125958065	0,0,250
chr15	88435105	88435405	B475	0	.	88435105	88435105	0,0,250
chr18	77465305	77465605	B476	0	.	77465305	77465305	0,0,250
chr2	85053945	85054245	B477	0	.	85053945	85053945	0,0,250
chr15	83867545	83867845	B478	0	.	83867545	83867545	0,0,250
chr5	64414245	64414545	B479	0	.	64414245	64414245	0,0,250
chr11	106684265	106684565	B48	0	.	106684265	106684265	0,0,250
chr6	87832865	87833165	B480	0	.	87832865	87832865	0,0,250
chr14	12505545	12505845	B481	0	.	12505545	12505545	0,0,250
chr4	90905785	90906085	B482	0	.	90905785	90905785	0,0,250
chr4	142466105	142466405	B483	0	.	142466105	142466105	0,0,250
chr9	62036185	62036485	B484	0	.	62036185	62036185	0,0,250
chr1	107360445	107360745	B485	0	.	107360445	107360445	0,0,250
chr6	112748405	112748705	B486	0	.	112748405	112748405	0,0,250
chr10	109003765	109004065	B487	0	.	109003765	109003765	0,0,250
chr9	97586145	97586445	B488	0	.	97586145	97586145	0,0,250
chr12	39764725	39765025	B489	0	.	39764725	39764725	0,0,250
chr13	44493965	44494265	B49	0	.	44493965	44493965	0,0,250
chr2	101302665	101302965	B490	0	.	101302665	101302665	0,0,250
chr3	55293565	55293865	B491	0	.	55293565	55293565	0,0,250
chr3	120649905	120650205	B492	0	.	120649905	120649905	0,0,250
chr5	14750905	14751205	B493	0	.	14750905	14750905	0,0,250
chr11	76623025	76623325	B494	0	.	76623025	76623025	0,0,250
chr13	43801845	43802145	B495	0	.	43801845	43801845	0,0,250
chr13	109624405	109624705	B496	0	.	109624405	109624405	0,0,250
chr16	28402805	28403105	B497	0	.	28402805	28402805	0,0,250
chr18	33922705	33923005	B498	0	.	33922705	33922705	0,0,250
chr12	82417065	82417365	B499	0	.	82417065	82417065	0,0,250
chr5	4486065	4486365	B5	0	.	4486065	4486065	0,0,250
chr9	29358205	29358505	B50	0	.	29358205	29358205	0,0,250
chr6	54406865	54407165	B500	0	.	54406865	54406865	0,0,250
chr1	195611165	195611465	B501	0	.	195611165	195611165	0,0,250
chr2	143043845	143044145	B502	0	.	143043845	143043845	0,0,250
chr3	114731585	114731885	B503	0	.	114731585	114731585	0,0,250
chr6	44247465	44247765	B504	0	.	44247465	44247465	0,0,250
chr1	83491645	83491945	B505	0	.	83491645	83491645	0,0,250
chr1	106898785	106899085	B506	0	.	106898785	106898785	0,0,250
chr12	83173805	83174105	B507	0	.	83173805	83173805	0,0,250
chr2	179497285	179497585	B508	0	.	179497285	179497285	0,0,250
chr7	137859025	137859325	B509	0	.	137859025	137859025	0,0,250
chr7	140478505	140478805	B51	0	.	140478505	140478505	0,0,250
chr9	28425345	28425645	B510	0	.	28425345	28425345	0,0,250
chr9	75154365	75154665	B511	0	.	75154365	75154365	0,0,250
chrX	7782745	7783045	B512	0	.	7782745	7782745	0,0,250
chr3	138528305	138528605	B513	0	.	138528305	138528305	0,0,250
chr9	96727845	96728145	B514	0	.	96727845	96727845	0,0,250
chr13	21125105	21125405	B515	0	.	21125105	21125105	0,0,250
chr14	26189785	26190085	B516	0	.	26189785	26189785	0,0,250
chr8	97297525	97297825	B517	0	.	97297525	97297525	0,0,250
chr11	45268485	45268785	B518	0	.	45268485	45268485	0,0,250
chr11	114729645	114729945	B519	0	.	114729645	114729645	0,0,250
chr2	163790345	163790645	B52	0	.	163790345	163790345	0,0,250
chr15	53579965	53580265	B520	0	.	53579965	53579965	0,0,250
chr11	97327805	97328105	B521	0	.	97327805	97327805	0,0,250
chr11	114037125	114037425	B522	0	.	114037125	114037125	0,0,250
chr13	64461085	64461385	B523	0	.	64461085	64461085	0,0,250
chr5	114041745	114042045	B524	0	.	114041745	114041745	0,0,250
chr6	137557065	137557365	B525	0	.	137557065	137557065	0,0,250
chrX	154813765	154814065	B526	0	.	154813765	154813765	0,0,250
chr11	43331225	43331525	B527	0	.	43331225	43331225	0,0,250
chr15	63878865	63879165	B528	0	.	63878865	63878865	0,0,250
chr15	71537445	71537745	B529	0	.	71537445	71537445	0,0,250
chr11	32491825	32492125	B53	0	.	32491825	32491825	0,0,250
chr17	49340825	49341125	B530	0	.	49340825	49340825	0,0,250
chr6	112838105	112838405	B531	0	.	112838105	112838105	0,0,250
chr8	26532005	26532305	B532	0	.	26532005	26532005	0,0,250
chr1	48590245	48590545	B533	0	.	48590245	48590245	0,0,250
chr10	40567345	40567645	B534	0	.	40567345	40567345	0,0,250
chr16	35577685	35577985	B535	0	.	35577685	35577685	0,0,250
chr2	52331425	52331725	B536	0	.	52331425	52331425	0,0,250
chr5	93664945	93665245	B537	0	.	93664945	93664945	0,0,250
chr6	82867125	82867425	B538	0	.	82867125	82867125	0,0,250
chr11	32417385	32417685	B539	0	.	32417385	32417385	0,0,250
chr12	39559705	39560005	B54	0	.	39559705	39559705	0,0,250
chr17	70713005	70713305	B540	0	.	70713005	70713005	0,0,250
chr17	91312705	91313005	B541	0	.	91312705	91312705	0,0,250
chr18	13557745	13558045	B542	0	.	13557745	13557745	0,0,250
chr2	17460165	17460465	B543	0	.	17460165	17460165	0,0,250
chr6	56286045	56286345	B544	0	.	56286045	56286045	0,0,250
chr7	58477225	58477525	B545	0	.	58477225	58477225	0,0,250
chr11	67477805	67478105	B546	0	.	67477805	67477805	0,0,250
chr7	152505325	152505625	B547	0	.	152505325	152505325	0,0,250
chr1	133248125	133248425	B548	0	.	133248125	133248125	0,0,250
chr11	92970805	92971105	B549	0	.	92970805	92970805	0,0,250
chr12	77906025	77906325	B55	0	.	77906025	77906025	0,0,250
chr2	52417965	52418265	B550	0	.	52417965	52417965	0,0,250
chr2	94320145	94320445	B551	0	.	94320145	94320145	0,0,250
chr9	120976205	120976505	B552	0	.	120976205	120976205	0,0,250
chr12	81899325	81899625	B553	0	.	81899325	81899325	0,0,250
chr3	25107245	25107545	B554	0	.	25107245	25107245	0,0,250
chr4	8803665	8803965	B555	0	.	8803665	8803665	0,0,250
chr7	125922145	125922445	B556	0	.	125922145	125922145	0,0,250
chr18	39038205	39038505	B557	0	.	39038205	39038205	0,0,250
chr8	53656585	53656885	B558	0	.	53656585	53656585	0,0,250
chr8	107833425	107833725	B559	0	.	107833425	107833425	0,0,250
chr16	9903145	9903445	B56	0	.	9903145	9903145	0,0,250
chr11	101885805	101886105	B560	0	.	101885805	101885805	0,0,250
chr18	61998985	61999285	B561	0	.	61998985	61998985	0,0,250
chr2	92993065	92993365	B562	0	.	92993065	92993065	0,0,250
chr7	99412945	99413245	B563	0	.	99412945	99412945	0,0,250
chr12	33442325	33442625	B564	0	.	33442325	33442325	0,0,250
chr12	45655825	45656125	B565	0	.	45655825	45655825	0,0,250
chr13	100324445	100324745	B566	0	.	100324445	100324445	0,0,250
chr16	24460185	24460485	B567	0	.	24460185	24460185	0,0,250
chr17	88197285	88197585	B568	0	.	88197285	88197285	0,0,250
chr4	25550365	25550665	B569	0	.	25550365	25550365	0,0,250
chr19	21816685	21816985	B57	0	.	21816685	21816685	0,0,250
chr2	57759405	57759705	B570	0	.	57759405	57759405	0,0,250
chr9	86868465	86868765	B571	0	.	86868465	86868465	0,0,250
chr1	129438185	129438485	B572	0	.	129438185	129438185	0,0,250
chr12	35756065	35756365	B573	0	.	35756065	35756065	0,0,250
chr2	3657025	3657325	B574	0	.	3657025	3657025	0,0,250
chr9	31138845	31139145	B575	0	.	31138845	31138845	0,0,250
chr1	175289745	175290045	B576	0	.	175289745	175289745	0,0,250
chr16	48332005	48332305	B577	0	.	48332005	48332005	0,0,250
chr18	37978925	37979225	B578	0	.	37978925	37978925	0,0,250
chr2	157882845	157883145	B579	0	.	157882845	157882845	0,0,250
chr2	52032185	52032485	B58	0	.	52032185	52032185	0,0,250
chr5	112913945	112914245	B580	0	.	112913945	112913945	0,0,250
chr7	71137045	71137345	B581	0	.	71137045	71137045	0,0,250
chr8	12893845	12894145	B582	0	.	12893845	12893845	0,0,250
chr9	91693365	91693665	B583	0	.	91693365	91693365	0,0,250
chr15	73751925	73752225	B584	0	.	73751925	73751925	0,0,250
chr19	22878865	22879165	B585	0	.	22878865	22878865	0,0,250
chr5	53533865	53534165	B586	0	.	53533865	53533865	0,0,250
chr10	90229065	90229365	B587	0	.	90229065	90229065	0,0,250
chr11	67483625	67483925	B588	0	.	67483625	67483625	0,0,250
chr11	93557805	93558105	B589	0	.	93557805	93557805	0,0,250
chr4	155065145	155065445	B59	0	.	155065145	155065145	0,0,250
chr15	37656565	37656865	B590	0	.	37656565	37656565	0,0,250
chr6	28751025	28751325	B591	0	.	28751025	28751025	0,0,250
chr17	6118885	6119185	B592	0	.	6118885	6118885	0,0,250
chr18	62060545	62060845	B593	0	.	62060545	62060545	0,0,250
chr2	138414865	138415165	B594	0	.	138414865	138414865	0,0,250
chr5	39849325	39849625	B595	0	.	39849325	39849325	0,0,250
chr7	85527105	85527405	B596	0	.	85527105	85527105	0,0,250
chr11	71752665	71752965	B597	0	.	71752665	71752665	0,0,250
chr16	16931045	16931345	B598	0	.	16931045	16931045	0,0,250
chr15	52244765	52245065	B599	0	.	52244765	52244765	0,0,250
chr19	23037245	23037545	B6	0	.	23037245	23037245	0,0,250
chr5	89243585	89243885	B60	0	.	89243585	89243585	0,0,250
chr5	68440125	68440425	B600	0	.	68440125	68440125	0,0,250
chr6	81421605	81421905	B601	0	.	81421605	81421605	0,0,250
chr1	59272345	59272645	B602	0	.	59272345	59272345	0,0,250
chr10	93096385	93096685	B603	0	.	93096385	93096385	0,0,250
chr2	136127185	136127485	B604	0	.	136127185	136127185	0,0,250
chr4	99379325	99379625	B605	0	.	99379325	99379325	0,0,250
chr7	147086845	147087145	B606	0	.	147086845	147086845	0,0,250
chr13	43725225	43725525	B607	0	.	43725225	43725225	0,0,250
chr16	51910205	51910505	B608	0	.	51910205	51910205	0,0,250
chr19	43540445	43540745	B609	0	.	43540445	43540445	0,0,250
chr2	137873585	137873885	B61	0	.	137873585	137873585	0,0,250
chr2	90810785	90811085	B610	0	.	90810785	90810785	0,0,250
chr3	85202405	85202705	B611	0	.	85202405	85202405	0,0,250
chr6	52837485	52837785	B612	0	.	52837485	52837485	0,0,250
chr6	107012885	107013185	B613	0	.	107012885	107012885	0,0,250
chr8	11770065	11770365	B614	0	.	11770065	11770065	0,0,250
chr8	124255365	124255665	B615	0	.	124255365	124255365	0,0,250
chr13	98320185	98320485	B616	0	.	98320185	98320185	0,0,250
chr7	129483085	129483385	B617	0	.	129483085	129483085	0,0,250
chr8	75028125	75028425	B618	0	.	75028125	75028125	0,0,250
chr8	89050745	89051045	B619	0	.	89050745	89050745	0,0,250
chr14	59557905	59558205	B62	0	.	59557905	59557905	0,0,250
chr12	44928305	44928605	B620	0	.	44928305	44928305	0,0,250
chr15	80158225	80158525	B621	0	.	80158225	80158225	0,0,250
chr4	13175605	13175905	B622	0	.	13175605	13175605	0,0,250
chr12	11405685	11405985	B623	0	.	11405685	11405685	0,0,250
chr18	33725965	33726265	B624	0	.	33725965	33725965	0,0,250
chr8	45776005	45776305	B625	0	.	45776005	45776005	0,0,250
chr11	55150085	55150385	B626	0	.	55150085	55150085	0,0,250
chr2	91332445	91332745	B627	0	.	91332445	91332445	0,0,250
chr8	37582785	37583085	B628	0	.	37582785	37582785	0,0,250
chr8	112685945	112686245	B629	0	.	112685945	112685945	0,0,250
chr11	42568445	42568745	B63	0	.	42568445	42568445	0,0,250
chr15	85233905	85234205	B630	0	.	85233905	85233905	0,0,250
chr17	8747125	8747425	B631	0	.	8747125	8747125	0,0,250
chr18	46058065	46058365	B632	0	.	46058065	46058065	0,0,250
chr9	89745405	89745705	B633	0	.	89745405	89745405	0,0,250
chr9	108039445	108039745	B634	0	.	108039445	108039445	0,0,250
chr1	136170985	136171285	B635	0	.	136170985	136170985	0,0,250
chr1	137501325	137501625	B636	0	.	137501325	137501325	0,0,250
chr10	24841025	24841325	B637	0	.	24841025	24841025	0,0,250
chr13	109966105	109966405	B638	0	.	109966105	109966105	0,0,250
chr15	4448085	4448385	B639	0	.	4448085	4448085	0,0,250
chr4	66211885	66212185	B64	0	.	66211885	66211885	0,0,250
chr16	9909345	9909645	B640	0	.	9909345	9909345	0,0,250
chr19	53528645	53528945	B641	0	.	53528645	53528645	0,0,250
chr10	115799305	115799605	B642	0	.	115799305	115799305	0,0,250
chr12	92199845	92200145	B643	0	.	92199845	92199845	0,0,250
chr13	59039905	59040205	B644	0	.	59039905	59039905	0,0,250
chr5	112750025	112750325	B645	0	.	112750025	112750025	0,0,250
chr6	107949305	107949605	B646	0	.	107949305	107949305	0,0,250
chr7	20185905	20186205	B647	0	.	20185905	20185905	0,0,250
chr7	85534965	85535265	B648	0	.	85534965	85534965	0,0,250
chr1	17050105	17050405	B649	0	.	17050105	17050105	0,0,250
chr7	70665225	70665525	B65	0	.	70665225	70665225	0,0,250
chr8	107990925	107991225	B650	0	.	107990925	107990925	0,0,250
chr8	116409085	116409385	B651	0	.	116409085	116409085	0,0,250
chr1	177897185	177897485	B652	0	.	177897185	177897185	0,0,250
chr15	94874505	94874805	B653	0	.	94874505	94874505	0,0,250
chr16	24390745	24391045	B654	0	.	24390745	24390745	0,0,250
chr6	106390845	106391145	B655	0	.	106390845	106390845	0,0,250
chr7	56034525	56034825	B656	0	.	56034525	56034525	0,0,250
chr1	73012945	73013245	B657	0	.	73012945	73012945	0,0,250
chr15	72499365	72499665	B658	0	.	72499365	72499365	0,0,250
chr18	56964565	56964865	B659	0	.	56964565	56964565	0,0,250
chr11	42740705	42741005	B66	0	.	42740705	42740705	0,0,250
chr7	31907705	31908005	B660	0	.	31907705	31907705	0,0,250
chr11	114345165	114345465	B661	0	.	114345165	114345165	0,0,250
chr15	91444485	91444785	B662	0	.	91444485	91444485	0,0,250
chr2	165152405	165152705	B663	0	.	165152405	165152405	0,0,250
chr4	154620805	154621105	B664	0	.	154620805	154620805	0,0,250
chr7	140801325	140801625	B665	0	.	140801325	140801325	0,0,250
chr12	71505365	71505665	B666	0	.	71505365	71505365	0,0,250
chr16	41941745	41942045	B667	0	.	41941745	41941745	0,0,250
chr1	72447225	72447525	B668	0	.	72447225	72447225	0,0,250
chr1	107360845	107361145	B669	0	.	107360845	107360845	0,0,250
chr12	78629125	78629425	B67	0	.	78629125	78629125	0,0,250
chr11	42568985	42569285	B670	0	.	42568985	42568985	0,0,250
chr12	106177585	106177885	B671	0	.	106177585	106177585	0,0,250
chr14	25893925	25894225	B672	0	.	25893925	25893925	0,0,250
chr14	52631805	52632105	B673	0	.	52631805	52631805	0,0,250
chr18	33321985	33322285	B674	0	.	33321985	33321985	0,0,250
chr19	58370525	58370825	B675	0	.	58370525	58370525	0,0,250
chr4	65335705	65336005	B676	0	.	65335705	65335705	0,0,250
chr6	56510565	56510865	B677	0	.	56510565	56510565	0,0,250
chr1	194211585	194211885	B678	0	.	194211585	194211585	0,0,250
chr11	36379705	36380005	B679	0	.	36379705	36379705	0,0,250
chr2	32870445	32870745	B68	0	.	32870445	32870445	0,0,250
chr12	8441165	8441465	B680	0	.	8441165	8441165	0,0,250
chr4	47621645	47621945	B681	0	.	47621645	47621645	0,0,250
chr9	117979605	117979905	B682	0	.	117979605	117979605	0,0,250
chr11	93016265	93016565	B683	0	.	93016265	93016265	0,0,250
chr13	52608965	52609265	B684	0	.	52608965	52608965	0,0,250
chr13	100220765	100221065	B685	0	.	100220765	100220765	0,0,250
chr15	45285405	45285705	B686	0	.	45285405	45285405	0,0,250
chr17	50139985	50140285	B687	0	.	50139985	50139985	0,0,250
chr5	101724985	101725285	B688	0	.	101724985	101724985	0,0,250
chr5	132248565	132248865	B689	0	.	132248565	132248565	0,0,250
chr6	19529405	19529705	B69	0	.	19529405	19529405	0,0,250
chr1	180994725	180995025	B690	0	.	180994725	180994725	0,0,250
chr18	51318385	51318685	B691	0	.	51318385	51318385	0,0,250
chr4	43992685	43992985	B692	0	.	43992685	43992685	0,0,250
chr5	37638765	37639065	B693	0	.	37638765	37638765	0,0,250
chr6	118674965	118675265	B694	0	.	118674965	118674965	0,0,250
chr9	78852485	78852785	B695	0	.	78852485	78852485	0,0,250
chr4	90901665	90901965	B696	0	.	90901665	90901665	0,0,250
chr15	98639325	98639625	B697	0	.	98639325	98639325	0,0,250
chr18	26339145	26339445	B698	0	.	26339145	26339145	0,0,250
chr19	22957245	22957545	B699	0	.	22957245	22957245	0,0,250
chr10	116308385	116308685	B7	0	.	116308385	116308385	0,0,250
chr2	139103325	139103625	B70	0	.	139103325	139103325	0,0,250
chr12	103453305	103453605	B700	0	.	103453305	103453305	0,0,250
chr15	80108865	80109165	B701	0	.	80108865	80108865	0,0,250
chr10	66487165	66487465	B702	0	.	66487165	66487165	0,0,250
chr13	43995525	43995825	B703	0	.	43995525	43995525	0,0,250
chr13	111417905	111418205	B704	0	.	111417905	111417905	0,0,250
chr14	55737685	55737985	B705	0	.	55737685	55737685	0,0,250
chr7	70701305	70701605	B706	0	.	70701305	70701305	0,0,250
chr7	133176365	133176665	B707	0	.	133176365	133176365	0,0,250
chr7	149747785	149748085	B708	0	.	149747785	149747785	0,0,250
chr9	13402165	13402465	B709	0	.	13402165	13402165	0,0,250
chr5	128026865	128027165	B71	0	.	128026865	128026865	0,0,250
chr1	59623785	59624085	B710	0	.	59623785	59623785	0,0,250
chr6	115035665	115035965	B711	0	.	115035665	115035665	0,0,250
chr17	11578105	11578405	B712	0	.	11578105	11578105	0,0,250
chr2	153789125	153789425	B713	0	.	153789125	153789125	0,0,250
chr3	139549525	139549825	B714	0	.	139549525	139549525	0,0,250
chr4	84986645	84986945	B715	0	.	84986645	84986645	0,0,250
chr4	127895465	127895765	B716	0	.	127895465	127895465	0,0,250
chr8	113229325	113229625	B717	0	.	113229325	113229325	0,0,250
chr16	67125145	67125445	B718	0	.	67125145	67125145	0,0,250
chr8	41700805	41701105	B719	0	.	41700805	41700805	0,0,250
chr18	68966365	68966665	B72	0	.	68966365	68966365	0,0,250
chr1	134425265	134425565	B720	0	.	134425265	134425265	0,0,250
chr11	42281925	42282225	B721	0	.	42281925	42281925	0,0,250
chr5	106480085	106480385	B722	0	.	106480085	106480085	0,0,250
chr5	108798325	108798625	B723	0	.	108798325	108798325	0,0,250
chr5	125364325	125364625	B724	0	.	125364325	125364325	0,0,250
chr14	77656765	77657065	B725	0	.	77656765	77656765	0,0,250
chr16	45768405	45768705	B726	0	.	45768405	45768405	0,0,250
chr5	102325845	102326145	B727	0	.	102325845	102325845	0,0,250
chr5	131347025	131347325	B728	0	.	131347025	131347025	0,0,250
chr9	28491665	28491965	B729	0	.	28491665	28491665	0,0,250
chr1	196404505	196404805	B73	0	.	196404505	196404505	0,0,250
chr1	137277305	137277605	B730	0	.	137277305	137277305	0,0,250
chr11	60843445	60843745	B731	0	.	60843445	60843445	0,0,250
chr12	87297205	87297505	B732	0	.	87297205	87297205	0,0,250
chr18	68163185	68163485	B733	0	.	68163185	68163185	0,0,250
chr4	130676625	130676925	B734	0	.	130676625	130676625	0,0,250
chr5	50033765	50034065	B735	0	.	50033765	50033765	0,0,250
chr5	140424585	140424885	B736	0	.	140424585	140424585	0,0,250
chr6	18589725	18590025	B737	0	.	18589725	18589725	0,0,250
chr1	175294605	175294905	B738	0	.	175294605	175294605	0,0,250
chr17	8745245	8745545	B739	0	.	8745245	8745245	0,0,250
chr12	88381885	88382185	B74	0	.	88381885	88381885	0,0,250
chr18	23505645	23505945	B740	0	.	23505645	23505645	0,0,250
chr18	25673545	25673845	B741	0	.	25673545	25673545	0,0,250
chr3	89563785	89564085	B742	0	.	89563785	89563785	0,0,250
chr4	64464985	64465285	B743	0	.	64464985	64464985	0,0,250
chr9	103451625	103451925	B744	0	.	103451625	103451625	0,0,250
chr10	97065925	97066225	B745	0	.	97065925	97065925	0,0,250
chr11	35150105	35150405	B746	0	.	35150105	35150105	0,0,250
chr12	109593525	109593825	B747	0	.	109593525	109593525	0,0,250
chr6	90752585	90752885	B748	0	.	90752585	90752585	0,0,250
chr9	28376565	28376865	B749	0	.	28376565	28376565	0,0,250
chr5	30893605	30893905	B75	0	.	30893605	30893605	0,0,250
chr1	156886085	156886385	B750	0	.	156886085	156886085	0,0,250
chr11	46048805	46049105	B751	0	.	46048805	46048805	0,0,250
chr15	79640505	79640805	B752	0	.	79640505	79640505	0,0,250
chr19	22827725	22828025	B753	0	.	22827725	22827725	0,0,250
chr2	91790945	91791245	B754	0	.	91790945	91790945	0,0,250
chr6	119759205	119759505	B755	0	.	119759205	119759205	0,0,250
chr12	114251165	114251465	B756	0	.	114251165	114251165	0,0,250
chr16	90023905	90024205	B757	0	.	90023905	90023905	0,0,250
chr19	10880465	10880765	B758	0	.	10880465	10880465	0,0,250
chr2	163739945	163740245	B759	0	.	163739945	163739945	0,0,250
chr10	4817885	4818185	B76	0	.	4817885	4817885	0,0,250
chr5	125317005	125317305	B760	0	.	125317005	125317005	0,0,250
chr7	121433525	121433825	B761	0	.	121433525	121433525	0,0,250
chr11	6799325	6799625	B762	0	.	6799325	6799325	0,0,250
chr11	6862845	6863145	B763	0	.	6862845	6862845	0,0,250
chr16	95208405	95208705	B764	0	.	95208405	95208405	0,0,250
chr4	137288925	137289225	B765	0	.	137288925	137288925	0,0,250
chr8	85724525	85724825	B766	0	.	85724525	85724525	0,0,250
chr10	13802145	13802445	B767	0	.	13802145	13802145	0,0,250
chr16	24176105	24176405	B768	0	.	24176105	24176105	0,0,250
chr18	31123745	31124045	B769	0	.	31123745	31123745	0,0,250
chr9	108055885	108056185	B77	0	.	108055885	108055885	0,0,250
chr19	23449465	23449765	B770	0	.	23449465	23449465	0,0,250
chr3	137127905	137128205	B771	0	.	137127905	137127905	0,0,250
chr3	153494285	153494585	B772	0	.	153494285	153494285	0,0,250
chr5	140086585	140086885	B773	0	.	140086585	140086585	0,0,250
chr8	88649185	88649485	B774	0	.	88649185	88649185	0,0,250
chr9	62132125	62132425	B775	0	.	62132125	62132125	0,0,250
chr9	102178285	102178585	B776	0	.	102178285	102178285	0,0,250
chr11	82497345	82497645	B777	0	.	82497345	82497345	0,0,250
chr16	37442645	37442945	B778	0	.	37442645	37442645	0,0,250
chr17	49667385	49667685	B779	0	.	49667385	49667385	0,0,250
chr1	83502005	83502305	B78	0	.	83502005	83502005	0,0,250
chr5	147588625	147588925	B780	0	.	147588625	147588625	0,0,250
chr11	53336465	53336765	B781	0	.	53336465	53336465	0,0,250
chr16	31446205	31446505	B782	0	.	31446205	31446205	0,0,250
chr17	86649505	86649805	B783	0	.	86649505	86649505	0,0,250
chr18	33930125	33930425	B784	0	.	33930125	33930125	0,0,250
chr4	9441985	9442285	B785	0	.	9441985	9441985	0,0,250
chr5	147902185	147902485	B786	0	.	147902185	147902185	0,0,250
chr7	151710325	151710625	B787	0	.	151710325	151710325	0,0,250
chr9	40792465	40792765	B788	0	.	40792465	40792465	0,0,250
chr11	108758425	108758725	B789	0	.	108758425	108758425	0,0,250
chr11	6020565	6020865	B79	0	.	6020565	6020565	0,0,250
chr18	62301905	62302205	B790	0	.	62301905	62301905	0,0,250
chr7	148671565	148671865	B791	0	.	148671565	148671565	0,0,250
chr9	27001305	27001605	B792	0	.	27001305	27001305	0,0,250
chr9	107863645	107863945	B793	0	.	107863645	107863645	0,0,250
chr14	103478445	103478745	B794	0	.	103478445	103478445	0,0,250
chr2	141444065	141444365	B795	0	.	141444065	141444065	0,0,250
chr7	85431825	85432125	B796	0	.	85431825	85431825	0,0,250
chr8	117124105	117124405	B797	0	.	117124105	117124105	0,0,250
chr15	22100125	22100425	B798	0	.	22100125	22100125	0,0,250
chr15	31021685	31021985	B799	0	.	31021685	31021685	0,0,250
chr9	53129445	53129745	B8	0	.	53129445	53129445	0,0,250
chr7	16734665	16734965	B80	0	.	16734665	16734665	0,0,250
chr4	64293285	64293585	B800	0	.	64293285	64293285	0,0,250
chr4	106140045	106140345	B801	0	.	106140045	106140045	0,0,250
chr8	67138005	67138305	B802	0	.	67138005	67138005	0,0,250
chr1	22638865	22639165	B803	0	.	22638865	22638865	0,0,250
chr18	13948965	13949265	B804	0	.	13948965	13948965	0,0,250
chr2	57753005	57753305	B805	0	.	57753005	57753005	0,0,250
chr8	5601165	5601465	B806	0	.	5601165	5601165	0,0,250
chr8	72922085	72922385	B807	0	.	72922085	72922085	0,0,250
chr9	41006965	41007265	B808	0	.	41006965	41006965	0,0,250
chr1	59369385	59369685	B809	0	.	59369385	59369385	0,0,250
chr4	154638645	154638945	B81	0	.	154638645	154638645	0,0,250
chr1	151519325	151519625	B810	0	.	151519325	151519325	0,0,250
chr10	80490085	80490385	B811	0	.	80490085	80490085	0,0,250
chr4	128076225	128076525	B812	0	.	128076225	128076225	0,0,250
chr9	108030625	108030925	B813	0	.	108030625	108030625	0,0,250
chr1	23660505	23660805	B814	0	.	23660505	23660505	0,0,250
chr1	88909205	88909505	B815	0	.	88909205	88909205	0,0,250
chr14	55673065	55673365	B816	0	.	55673065	55673065	0,0,250
chr15	74424465	74424765	B817	0	.	74424465	74424465	0,0,250
chr15	91444805	91445105	B818	0	.	91444805	91444805	0,0,250
chr2	124857645	124857945	B819	0	.	124857645	124857645	0,0,250
chr13	110857345	110857645	B82	0	.	110857345	110857345	0,0,250
chr4	84980625	84980925	B820	0	.	84980625	84980625	0,0,250
chr7	73153465	73153765	B821	0	.	73153465	73153465	0,0,250
chr7	146279025	146279325	B822	0	.	146279025	146279025	0,0,250
chr9	94482725	94483025	B823	0	.	94482725	94482725	0,0,250
chr1	76734225	76734525	B824	0	.	76734225	76734225	0,0,250
chr10	90062525	90062825	B825	0	.	90062525	90062525	0,0,250
chr12	32398645	32398945	B826	0	.	32398645	32398645	0,0,250
chr12	99691425	99691725	B827	0	.	99691425	99691425	0,0,250
chr13	59741445	59741745	B828	0	.	59741445	59741445	0,0,250
chr14	103839485	103839785	B829	0	.	103839485	103839485	0,0,250
chr14	28083045	28083345	B83	0	.	28083045	28083045	0,0,250
chr15	8742125	8742425	B830	0	.	8742125	8742125	0,0,250
chr17	28008845	28009145	B831	0	.	28008845	28008845	0,0,250
chr18	24493685	24493985	B832	0	.	24493685	24493685	0,0,250
chr2	167285005	167285305	B833	0	.	167285005	167285005	0,0,250
chr2	177865685	177865985	B834	0	.	177865685	177865685	0,0,250
chr4	8946465	8946765	B835	0	.	8946465	8946465	0,0,250
chr10	40408145	40408445	B836	0	.	40408145	40408145	0,0,250
chr12	45481825	45482125	B837	0	.	45481825	45481825	0,0,250
chr13	108954165	108954465	B838	0	.	108954165	108954165	0,0,250
chr2	178008905	178009205	B839	0	.	178008905	178008905	0,0,250
chr4	154639045	154639345	B84	0	.	154639045	154639045	0,0,250
chr6	126594705	126595005	B840	0	.	126594705	126594705	0,0,250
chr15	4169165	4169465	B841	0	.	4169165	4169165	0,0,250
chr16	6716365	6716665	B842	0	.	6716365	6716365	0,0,250
chr16	82661325	82661625	B843	0	.	82661325	82661325	0,0,250
chr2	71873745	71874045	B844	0	.	71873745	71873745	0,0,250
chr4	46074505	46074805	B845	0	.	46074505	46074505	0,0,250
chr8	60063265	60063565	B846	0	.	60063265	60063265	0,0,250
chr11	93135265	93135565	B847	0	.	93135265	93135265	0,0,250
chr12	91027265	91027565	B848	0	.	91027265	91027265	0,0,250
chr13	114777105	114777405	B849	0	.	114777105	114777105	0,0,250
chr1	177361545	177361845	B85	0	.	177361545	177361545	0,0,250
chr18	74305865	74306165	B850	0	.	74305865	74305865	0,0,250
chr3	126334565	126334865	B851	0	.	126334565	126334565	0,0,250
chr5	24561205	24561505	B852	0	.	24561205	24561205	0,0,250
chr11	41930485	41930785	B853	0	.	41930485	41930485	0,0,250
chr15	41380925	41381225	B854	0	.	41380925	41380925	0,0,250
chr16	9993805	9994105	B855	0	.	9993805	9993805	0,0,250
chr16	42360225	42360525	B856	0	.	42360225	42360225	0,0,250
chr17	45667265	45667565	B857	0	.	45667265	45667265	0,0,250
chr18	77464105	77464405	B858	0	.	77464105	77464105	0,0,250
chr4	134009905	134010205	B859	0	.	134009905	134009905	0,0,250
chr15	102375305	102375605	B86	0	.	102375305	102375305	0,0,250
chr9	37433325	37433625	B860	0	.	37433325	37433325	0,0,250
chr1	59279025	59279325	B861	0	.	59279025	59279025	0,0,250
chr16	31876465	31876765	B862	0	.	31876465	31876465	0,0,250
chr5	125315605	125315905	B863	0	.	125315605	125315605	0,0,250
chr6	89416325	89416625	B864	0	.	89416325	89416325	0,0,250
chr6	140467965	140468265	B865	0	.	140467965	140467965	0,0,250
chr1	24230165	24230465	B866	0	.	24230165	24230165	0,0,250
chr10	64349725	64350025	B867	0	.	64349725	64349725	0,0,250
chr11	78316465	78316765	B868	0	.	78316465	78316465	0,0,250
chr16	22491885	22492185	B869	0	.	22491885	22491885	0,0,250
chr11	100268685	100268985	B87	0	.	100268685	100268685	0,0,250
chr17	63665025	63665325	B870	0	.	63665025	63665025	0,0,250
chr18	35459425	35459725	B871	0	.	35459425	35459425	0,0,250
chr2	120830165	120830465	B872	0	.	120830165	120830165	0,0,250
chr8	27643985	27644285	B873	0	.	27643985	27643985	0,0,250
chr10	4858065	4858365	B874	0	.	4858065	4858065	0,0,250
chr10	16849625	16849925	B875	0	.	16849625	16849625	0,0,250
chr10	83844205	83844505	B876	0	.	83844205	83844205	0,0,250
chr10	115517965	115518265	B877	0	.	115517965	115517965	0,0,250
chr13	59175205	59175505	B878	0	.	59175205	59175205	0,0,250
chr15	30824885	30825185	B879	0	.	30824885	30824885	0,0,250
chr6	115119005	115119305	B88	0	.	115119005	115119005	0,0,250
chr17	73621305	73621605	B880	0	.	73621305	73621305	0,0,250
chr2	37611765	37612065	B881	0	.	37611765	37611765	0,0,250
chr4	47720885	47721185	B882	0	.	47720885	47720885	0,0,250
chr5	150363825	150364125	B883	0	.	150363825	150363825	0,0,250
chr8	90192185	90192485	B884	0	.	90192185	90192185	0,0,250
chr9	108039905	108040205	B885	0	.	108039905	108039905	0,0,250
chr2	71854105	71854405	B886	0	.	71854105	71854105	0,0,250
chr7	98721185	98721485	B887	0	.	98721185	98721185	0,0,250
chr8	11762085	11762385	B888	0	.	11762085	11762085	0,0,250
chr8	128850665	128850965	B889	0	.	128850665	128850665	0,0,250
chr4	8940025	8940325	B89	0	.	8940025	8940025	0,0,250
chr9	91441965	91442265	B890	0	.	91441965	91441965	0,0,250
chr10	115438965	115439265	B891	0	.	115438965	115438965	0,0,250
chr11	94360345	94360645	B892	0	.	94360345	94360345	0,0,250
chr13	52605945	52606245	B893	0	.	52605945	52605945	0,0,250
chr14	28673885	28674185	B894	0	.	28673885	28673885	0,0,250
chr15	79923085	79923385	B895	0	.	79923085	79923085	0,0,250
chr2	101489225	101489525	B896	0	.	101489225	101489225	0,0,250
chr2	128959165	128959465	B897	0	.	128959165	128959165	0,0,250
chr2	136529145	136529445	B898	0	.	136529145	136529145	0,0,250
chr4	46722425	46722725	B899	0	.	46722425	46722425	0,0,250
chr15	79952125	79952425	B9	0	.	79952125	79952125	0,0,250
chr10	57383605	57383905	B90	0	.	57383605	57383605	0,0,250
chr6	88440665	88440965	B900	0	.	88440665	88440665	0,0,250
chr18	62001465	62001765	B901	0	.	62001465	62001465	0,0,250
chr2	149699105	149699405	B902	0	.	149699105	149699105	0,0,250
chr2	180854745	180855045	B903	0	.	180854745	180854745	0,0,250
chr3	28449765	28450065	B904	0	.	28449765	28449765	0,0,250
chr9	105978625	105978925	B905	0	.	105978625	105978625	0,0,250
chr1	111845185	111845485	B906	0	.	111845185	111845185	0,0,250
chr10	69172405	69172705	B907	0	.	69172405	69172405	0,0,250
chr10	109127685	109127985	B908	0	.	109127685	109127685	0,0,250
chr12	88305305	88305605	B909	0	.	88305305	88305305	0,0,250
chr4	107493905	107494205	B91	0	.	107493905	107493905	0,0,250
chr14	68662825	68663125	B910	0	.	68662825	68662825	0,0,250
chr15	23326465	23326765	B911	0	.	23326465	23326465	0,0,250
chr4	101095645	101095945	B912	0	.	101095645	101095645	0,0,250
chr9	108056405	108056705	B913	0	.	108056405	108056405	0,0,250
chr1	52578305	52578605	B914	0	.	52578305	52578305	0,0,250
chr13	76703405	76703705	B915	0	.	76703405	76703405	0,0,250
chr15	88936585	88936885	B916	0	.	88936585	88936585	0,0,250
chr2	164313425	164313725	B917	0	.	164313425	164313425	0,0,250
chr5	50037105	50037405	B918	0	.	50037105	50037105	0,0,250
chr5	118492665	118492965	B919	0	.	118492665	118492665	0,0,250
chr9	29383525	29383825	B92	0	.	29383525	29383525	0,0,250
chr6	50316365	50316665	B920	0	.	50316365	50316365	0,0,250
chr7	25754825	25755125	B921	0	.	25754825	25754825	0,0,250
chr8	4256965	4257265	B922	0	.	4256965	4256965	0,0,250
chr8	115105385	115105685	B923	0	.	115105385	115105385	0,0,250
chr16	77154105	77154405	B924	0	.	77154105	77154105	0,0,250
chr2	118601605	118601905	B925	0	.	118601605	118601605	0,0,250
chr9	29997705	29998005	B926	0	.	29997705	29997705	0,0,250
chr9	120606965	120607265	B927	0	.	120606965	120606965	0,0,250
chr11	118722625	118722925	B928	0	.	118722625	118722625	0,0,250
chr12	104146445	104146745	B929	0	.	104146445	104146445	0,0,250
chr13	35333405	35333705	B93	0	.	35333405	35333405	0,0,250
chr15	37446885	37447185	B930	0	.	37446885	37446885	0,0,250
chr3	18583385	18583685	B931	0	.	18583385	18583385	0,0,250
chr5	43730385	43730685	B932	0	.	43730385	43730385	0,0,250
chr6	48010425	48010725	B933	0	.	48010425	48010425	0,0,250
chr8	26415945	26416245	B934	0	.	26415945	26415945	0,0,250
chr8	113405925	113406225	B935	0	.	113405925	113405925	0,0,250
chr8	117956565	117956865	B936	0	.	117956565	117956565	0,0,250
chr9	57781025	57781325	B937	0	.	57781025	57781025	0,0,250
chr1	89814725	89815025	B938	0	.	89814725	89814725	0,0,250
chr11	79317385	79317685	B939	0	.	79317385	79317385	0,0,250
chr17	86665445	86665745	B94	0	.	86665445	86665445	0,0,250
chr16	16554245	16554545	B940	0	.	16554245	16554245	0,0,250
chr3	105456985	105457285	B941	0	.	105456985	105456985	0,0,250
chr5	28517685	28517985	B942	0	.	28517685	28517685	0,0,250
chr8	121403905	121404205	B943	0	.	121403905	121403905	0,0,250
chr1	22519405	22519705	B944	0	.	22519405	22519405	0,0,250
chr1	25142525	25142825	B945	0	.	25142525	25142525	0,0,250
chr10	21588485	21588785	B946	0	.	21588485	21588485	0,0,250
chr11	113788585	113788885	B947	0	.	113788585	113788585	0,0,250
chr16	41872345	41872645	B948	0	.	41872345	41872345	0,0,250
chr4	75821065	75821365	B949	0	.	75821065	75821065	0,0,250
chr3	137030905	137031205	B95	0	.	137030905	137030905	0,0,250
chr4	130417905	130418205	B950	0	.	130417905	130417905	0,0,250
chr9	100461005	100461305	B951	0	.	100461005	100461005	0,0,250
chr1	58796485	58796785	B952	0	.	58796485	58796485	0,0,250
chr11	118071545	118071845	B953	0	.	118071545	118071545	0,0,250
chr12	32577665	32577965	B954	0	.	32577665	32577665	0,0,250
chr2	18139585	18139885	B955	0	.	18139585	18139585	0,0,250
chr3	120953865	120954165	B956	0	.	120953865	120953865	0,0,250
chr5	35462785	35463085	B957	0	.	35462785	35462785	0,0,250
chr7	86631525	86631825	B958	0	.	86631525	86631525	0,0,250
chr8	129241645	129241945	B959	0	.	129241645	129241645	0,0,250
chr10	82139765	82140065	B96	0	.	82139765	82139765	0,0,250
chr14	64200165	64200465	B960	0	.	64200165	64200165	0,0,250
chr16	67850545	67850845	B961	0	.	67850545	67850545	0,0,250
chr2	154391345	154391645	B962	0	.	154391345	154391345	0,0,250
chr3	65103165	65103465	B963	0	.	65103165	65103165	0,0,250
chr5	21633445	21633745	B964	0	.	21633445	21633445	0,0,250
chr5	107925105	107925405	B965	0	.	107925105	107925105	0,0,250
chr7	151736105	151736405	B966	0	.	151736105	151736105	0,0,250
chr11	36370865	36371165	B967	0	.	36370865	36370865	0,0,250
chr17	48691165	48691465	B968	0	.	48691165	48691165	0,0,250
chr2	32452285	32452585	B969	0	.	32452285	32452285	0,0,250
chr10	96291225	96291525	B97	0	.	96291225	96291225	0,0,250
chr3	65100965	65101265	B970	0	.	65100965	65100965	0,0,250
chr4	33823065	33823365	B971	0	.	33823065	33823065	0,0,250
chr5	107708265	107708565	B972	0	.	107708265	107708265	0,0,250
chr9	29148965	29149265	B973	0	.	29148965	29148965	0,0,250
chr11	35118725	35119025	B974	0	.	35118725	35118725	0,0,250
chr13	49267785	49268085	B975	0	.	49267785	49267785	0,0,250
chr17	31268285	31268585	B976	0	.	31268285	31268285	0,0,250
chr3	126447365	126447665	B977	0	.	126447365	126447365	0,0,250
chr4	148691545	148691845	B978	0	.	148691545	148691545	0,0,250
chr6	89187325	89187625	B979	0	.	89187325	89187325	0,0,250
chr1	180384325	180384625	B98	0	.	180384325	180384325	0,0,250
chr15	95318485	95318785	B980	0	.	95318485	95318485	0,0,250
chr3	137224125	137224425	B981	0	.	137224125	137224125	0,0,250
chr8	126953345	126953645	B982	0	.	126953345	126953345	0,0,250
chr9	53152825	53153125	B983	0	.	53152825	53152825	0,0,250
chr9	61628445	61628745	B984	0	.	61628445	61628445	0,0,250
chr10	19738185	19738485	B985	0	.	19738185	19738185	0,0,250
chr11	104491805	104492105	B986	0	.	104491805	104491805	0,0,250
chr4	90762805	90763105	B987	0	.	90762805	90762805	0,0,250
chr5	130950785	130951085	B988	0	.	130950785	130950785	0,0,250
chr6	24566765	24567065	B989	0	.	24566765	24566765	0,0,250
chr11	106676305	106676605	B99	0	.	106676305	106676305	0,0,250
chr6	37146925	37147225	B990	0	.	37146925	37146925	0,0,250
chr6	75552645	75552945	B991	0	.	75552645	75552645	0,0,250
chr6	115918165	115918465	B992	0	.	115918165	115918165	0,0,250
chr8	12962625	12962925	B993	0	.	12962625	12962625	0,0,250
chr1	182437685	182437985	B994	0	.	182437685	182437685	0,0,250
chr11	104116045	104116345	B995	0	.	104116045	104116045	0,0,250
chr18	77461905	77462205	B996	0	.	77461905	77461905	0,0,250
chr19	21798385	21798685	B997	0	.	21798385	21798385	0,0,250
chr19	44475365	44475665	B998	0	.	44475365	44475365	0,0,250
chr3	55247685	55247985	B999	0	.	55247685	55247685	0,0,250
chr5	147136445	147136745	H1	0	.	147136445	147136445	200,0,0
chr10	76903585	76903885	H10	0	.	76903585	76903585	200,0,0
chr9	9412505	9412805	H100	0	.	9412505	9412505	200,0,0
chr17	29155305	29155605	H1000	0	.	29155305	29155305	200,0,0
chr1	52479025	52479325	H101	0	.	52479025	52479025	200,0,0
chr18	69320085	69320385	H102	0	.	69320085	69320085	200,0,0
chr2	14851565	14851865	H103	0	.	14851565	14851565	200,0,0
chr1	92553505	92553805	H104	0	.	92553505	92553505	200,0,0
chr1	166726605	166726905	H105	0	.	166726605	166726605	200,0,0
chr10	5864525	5864825	H106	0	.	5864525	5864525	200,0,0
chr10	21672385	21672685	H107	0	.	21672385	21672385	200,0,0
chr13	12225805	12226105	H108	0	.	12225805	12225805	200,0,0
chr2	156452305	156452605	H109	0	.	156452305	156452305	200,0,0
chr3	30445825	30446125	H11	0	.	30445825	30445825	200,0,0
chr7	104411125	104411425	H110	0	.	104411125	104411125	200,0,0
chr7	119803865	119804165	H111	0	.	119803865	119803865	200,0,0
chr8	3187485	3187785	H112	0	.	3187485	3187485	200,0,0
chr9	114577285	114577585	H113	0	.	114577285	114577285	200,0,0
chr18	80527845	80528145	H114	0	.	80527845	80527845	200,0,0
chr5	114110945	114111245	H115	0	.	114110945	114110945	200,0,0
chr9	44542185	44542485	H116	0	.	44542185	44542185	200,0,0
chr10	8656185	8656485	H117	0	.	8656185	8656185	200,0,0
chr15	51079625	51079925	H118	0	.	51079625	51079625	200,0,0
chr3	9123165	9123465	H119	0	.	9123165	9123165	200,0,0
chr1	12754285	12754585	H12	0	.	12754285	12754285	200,0,0
chr5	92058525	92058825	H120	0	.	92058525	92058525	200,0,0
chr5	112049005	112049305	H121	0	.	112049005	112049005	200,0,0
chr10	83693305	83693605	H122	0	.	83693305	83693305	200,0,0
chr12	9084625	9084925	H123	0	.	9084625	9084625	200,0,0
chr12	9231885	9232185	H124	0	.	9231885	9231885	200,0,0
chr15	33260125	33260425	H125	0	.	33260125	33260125	200,0,0
chr5	72837385	72837685	H126	0	.	72837385	72837385	200,0,0
chr4	81559205	81559505	H127	0	.	81559205	81559205	200,0,0
chr5	74208465	74208765	H128	0	.	74208465	74208465	200,0,0
chr5	101266985	101267285	H129	0	.	101266985	101266985	200,0,0
chr2	165948365	165948665	H13	0	.	165948365	165948365	200,0,0
chr1	43314825	43315125	H130	0	.	43314825	43314825	200,0,0
chr10	24329665	24329965	H131	0	.	24329665	24329665	200,0,0
chr10	96852885	96853185	H132	0	.	96852885	96852885	200,0,0
chr4	65209585	65209885	H133	0	.	65209585	65209585	200,0,0
chr7	103861445	103861745	H134	0	.	103861445	103861445	200,0,0
chr9	77686465	77686765	H135	0	.	77686465	77686465	200,0,0
chr10	52895845	52896145	H136	0	.	52895845	52895845	200,0,0
chr12	25364925	25365225	H137	0	.	25364925	25364925	200,0,0
chr16	37790105	37790405	H138	0	.	37790105	37790105	200,0,0
chr17	10667045	10667345	H139	0	.	10667045	10667045	200,0,0
chr13	104128765	104129065	H14	0	.	104128765	104128765	200,0,0
chr3	27890285	27890585	H140	0	.	27890285	27890285	200,0,0
chr9	67413825	67414125	H141	0	.	67413825	67413825	200,0,0
chr9	71252605	71252905	H142	0	.	71252605	71252605	200,0,0
chr10	67239585	67239885	H143	0	.	67239585	67239585	200,0,0
chr11	89985205	89985505	H144	0	.	89985205	89985205	200,0,0
chr15	40769225	40769525	H145	0	.	40769225	40769225	200,0,0
chr9	71437085	71437385	H146	0	.	71437085	71437085	200,0,0
chr10	116479385	116479685	H147	0	.	116479385	116479385	200,0,0
chr11	62737605	62737905	H148	0	.	62737605	62737605	200,0,0
chr12	71699445	71699745	H149	0	.	71699445	71699445	200,0,0
chr6	116585245	116585545	H15	0	.	116585245	116585245	200,0,0
chr19	53804425	53804725	H150	0	.	53804425	53804425	200,0,0
chr8	107134145	107134445	H151	0	.	107134145	107134145	200,0,0
chr8	123705185	123705485	H152	0	.	123705185	123705185	200,0,0
chr1	12761585	12761885	H153	0	.	12761585	12761585	200,0,0
chr11	116509985	116510285	H154	0	.	116509985	116509985	200,0,0
chr14	24313725	24314025	H155	0	.	24313725	24313725	200,0,0
chr2	50546025	50546325	H156	0	.	50546025	50546025	200,0,0
chr2	74996665	74996965	H157	0	.	74996665	74996665	200,0,0
chr2	170155985	170156285	H158	0	.	170155985	170155985	200,0,0
chr3	21306125	21306425	H159	0	.	21306125	21306125	200,0,0
chr2	50545665	50545965	H16	0	.	50545665	50545665	200,0,0
chr7	104535065	104535365	H160	0	.	104535065	104535065	200,0,0
chr8	123772785	123773085	H161	0	.	123772785	123772785	200,0,0
chr1	92418885	92419185	H162	0	.	92418885	92418885	200,0,0
chr12	72727945	72728245	H163	0	.	72727945	72727945	200,0,0
chr15	85069885	85070185	H164	0	.	85069885	85069885	200,0,0
chr2	118542425	118542725	H165	0	.	118542425	118542425	200,0,0
chr11	111597325	111597625	H166	0	.	111597325	111597325	200,0,0
chr15	51423725	51424025	H167	0	.	51423725	51423725	200,0,0
chr16	38362065	38362365	H168	0	.	38362065	38362065	200,0,0
chr3	27658025	27658325	H169	0	.	27658025	27658025	200,0,0
chr6	29038345	29038645	H17	0	.	29038345	29038345	200,0,0
chr4	141827485	141827785	H170	0	.	141827485	141827485	200,0,0
chr6	115182665	115182965	H171	0	.	115182665	115182665	200,0,0
chr10	94780525	94780825	H172	0	.	94780525	94780525	200,0,0
chr12	33541845	33542145	H173	0	.	33541845	33541845	200,0,0
chr12	84099685	84099985	H174	0	.	84099685	84099685	200,0,0
chr14	70423045	70423345	H175	0	.	70423045	70423045	200,0,0
chr4	132664505	132664805	H176	0	.	132664505	132664505	200,0,0
chr9	24701165	24701465	H177	0	.	24701165	24701165	200,0,0
chr1	137490525	137490825	H178	0	.	137490525	137490525	200,0,0
chr1	188223765	188224065	H179	0	.	188223765	188223765	200,0,0
chr15	66942065	66942365	H18	0	.	66942065	66942065	200,0,0
chr10	56834525	56834825	H180	0	.	56834525	56834525	200,0,0
chr11	65117365	65117665	H181	0	.	65117365	65117365	200,0,0
chr12	100847925	100848225	H182	0	.	100847925	100847925	200,0,0
chr13	35555765	35556065	H183	0	.	35555765	35555765	200,0,0
chr2	25255785	25256085	H184	0	.	25255785	25255785	200,0,0
chr2	50798285	50798585	H185	0	.	50798285	50798285	200,0,0
chr2	77150705	77151005	H186	0	.	77150705	77150705	200,0,0
chr2	173177365	173177665	H187	0	.	173177365	173177365	200,0,0
chr6	118155265	118155565	H188	0	.	118155265	118155265	200,0,0
chr8	71499665	71499965	H189	0	.	71499665	71499665	200,0,0
chr9	68250845	68251145	H19	0	.	68250845	68250845	200,0,0
chr1	73718905	73719205	H190	0	.	73718905	73718905	200,0,0
chr10	90730665	90730965	H191	0	.	90730665	90730665	200,0,0
chr13	12430145	12430445	H192	0	.	12430145	12430145	200,0,0
chr13	51408965	51409265	H193	0	.	51408965	51408965	200,0,0
chr14	26065205	26065505	H194	0	.	26065205	26065205	200,0,0
chr4	63737565	63737865	H195	0	.	63737565	63737565	200,0,0
chr6	72543445	72543745	H196	0	.	72543445	72543445	200,0,0
chr6	84193425	84193725	H197	0	.	84193425	84193425	200,0,0
chr6	91152105	91152405	H198	0	.	91152105	91152105	200,0,0
chr9	110866105	110866405	H199	0	.	110866105	110866105	200,0,0
chr9	24724485	24724785	H2	0	.	24724485	24724485	200,0,0
chr12	33569325	33569625	H20	0	.	33569325	33569325	200,0,0
chr15	51406325	51406625	H200	0	.	51406325	51406325	200,0,0
chr15	63196105	63196405	H201	0	.	63196105	63196105	200,0,0
chr2	128296165	128296465	H202	0	.	128296165	128296165	200,0,0
chr2	148457445	148457745	H203	0	.	148457445	148457445	200,0,0
chr3	145560765	145561065	H204	0	.	145560765	145560765	200,0,0
chr5	122544525	122544825	H205	0	.	122544525	122544525	200,0,0
chr6	118274625	118274925	H206	0	.	118274625	118274625	200,0,0
chr6	121169485	121169785	H207	0	.	121169485	121169485	200,0,0
chr11	50520765	50521065	H208	0	.	50520765	50520765	200,0,0
chr13	60511125	60511425	H209	0	.	60511125	60511125	200,0,0
chr13	13580165	13580465	H21	0	.	13580165	13580165	200,0,0
chr15	57543925	57544225	H210	0	.	57543925	57543925	200,0,0
chr2	31195385	31195685	H211	0	.	31195385	31195385	200,0,0
chr2	85012645	85012945	H212	0	.	85012645	85012645	200,0,0
chr4	153602465	153602765	H213	0	.	153602465	153602465	200,0,0
chr9	61293445	61293745	H214	0	.	61293445	61293445	200,0,0
chr9	87986625	87986925	H215	0	.	87986625	87986625	200,0,0
chr11	88473505	88473805	H216	0	.	88473505	88473505	200,0,0
chr11	117419305	117419605	H217	0	.	117419305	117419305	200,0,0
chr13	46522305	46522605	H218	0	.	46522305	46522305	200,0,0
chr13	113173265	113173565	H219	0	.	113173265	113173265	200,0,0
chr4	114206485	114206785	H22	0	.	114206485	114206485	200,0,0
chr15	33356605	33356905	H220	0	.	33356605	33356605	200,0,0
chr6	91135565	91135865	H221	0	.	91135565	91135565	200,0,0
chr7	20237965	20238265	H222	0	.	20237965	20237965	200,0,0
chr7	106883085	106883385	H223	0	.	106883085	106883085	200,0,0
chr9	49413885	49414185	H224	0	.	49413885	49413885	200,0,0
chr10	6535385	6535685	H225	0	.	6535385	6535385	200,0,0
chr13	4771565	4771865	H226	0	.	4771565	4771565	200,0,0
chr15	76853045	76853345	H227	0	.	76853045	76853045	200,0,0
chr2	30444725	30445025	H228	0	.	30444725	30444725	200,0,0
chr3	57056505	57056805	H229	0	.	57056505	57056505	200,0,0
chr1	122654745	122655045	H23	0	.	122654745	122654745	200,0,0
chr5	149083665	149083965	H230	0	.	149083665	149083665	200,0,0
chr5	150750125	150750425	H231	0	.	150750125	150750125	200,0,0
chr6	24533465	24533765	H232	0	.	24533465	24533465	200,0,0
chr6	94570725	94571025	H233	0	.	94570725	94570725	200,0,0
chr7	4473985	4474285	H234	0	.	4473985	4473985	200,0,0
chr7	124614045	124614345	H235	0	.	124614045	124614045	200,0,0
chr7	149885285	149885585	H236	0	.	149885285	149885285	200,0,0
chr9	67011525	67011825	H237	0	.	67011525	67011525	200,0,0
chr9	110665945	110666245	H238	0	.	110665945	110665945	200,0,0
chr1	151745185	151745485	H239	0	.	151745185	151745185	200,0,0
chr2	72885525	72885825	H24	0	.	72885525	72885525	200,0,0
chr10	77542685	77542985	H240	0	.	77542685	77542685	200,0,0
chr14	63685805	63686105	H241	0	.	63685805	63685805	200,0,0
chr15	31117265	31117565	H242	0	.	31117265	31117265	200,0,0
chr16	76787065	76787365	H243	0	.	76787065	76787065	200,0,0
chr19	27174345	27174645	H244	0	.	27174345	27174345	200,0,0
chr3	38262845	38263145	H245	0	.	38262845	38262845	200,0,0
chr3	135230905	135231205	H246	0	.	135230905	135230905	200,0,0
chr5	54341525	54341825	H247	0	.	54341525	54341525	200,0,0
chr5	112234965	112235265	H248	0	.	112234965	112234965	200,0,0
chr7	96248225	96248525	H249	0	.	96248225	96248225	200,0,0
chr8	96395245	96395545	H25	0	.	96395245	96395245	200,0,0
chr1	52480645	52480945	H250	0	.	52480645	52480645	200,0,0
chr1	92399425	92399725	H251	0	.	92399425	92399425	200,0,0
chr1	137732585	137732885	H252	0	.	137732585	137732585	200,0,0
chr10	94824185	94824485	H253	0	.	94824185	94824185	200,0,0
chr16	84771765	84772065	H254	0	.	84771765	84771765	200,0,0
chr2	118576265	118576565	H255	0	.	118576265	118576265	200,0,0
chr2	125356565	125356865	H256	0	.	125356565	125356565	200,0,0
chr2	167395805	167396105	H257	0	.	167395805	167395805	200,0,0
chr4	107691965	107692265	H258	0	.	107691965	107691965	200,0,0
chr7	108234345	108234645	H259	0	.	108234345	108234345	200,0,0
chr7	73047165	73047465	H26	0	.	73047165	73047165	200,0,0
chr8	46957545	46957845	H260	0	.	46957545	46957545	200,0,0
chr10	13768085	13768385	H261	0	.	13768085	13768085	200,0,0
chr14	30858545	30858845	H262	0	.	30858545	30858545	200,0,0
chr18	73731605	73731905	H263	0	.	73731605	73731605	200,0,0
chr5	122449025	122449325	H264	0	.	122449025	122449025	200,0,0
chr5	138110225	138110525	H265	0	.	138110225	138110225	200,0,0
chr6	42309465	42309765	H266	0	.	42309465	42309465	200,0,0
chr7	17346285	17346585	H267	0	.	17346285	17346285	200,0,0
chr7	96248405	96248705	H268	0	.	96248405	96248405	200,0,0
chr8	64160065	64160365	H269	0	.	64160065	64160065	200,0,0
chr14	55587185	55587485	H27	0	.	55587185	55587185	200,0,0
chr1	36629585	36629885	H270	0	.	36629585	36629585	200,0,0
chr10	13387245	13387545	H271	0	.	13387245	13387245	200,0,0
chr11	44056745	44057045	H272	0	.	44056745	44056745	200,0,0
chr11	65023005	65023305	H273	0	.	65023005	65023005	200,0,0
chr11	78894445	78894745	H274	0	.	78894445	78894445	200,0,0
chr14	46915985	46916285	H275	0	.	46915985	46915985	200,0,0
chr15	97961505	97961805	H276	0	.	97961505	97961505	200,0,0
chr17	64449525	64449825	H277	0	.	64449525	64449525	200,0,0
chr18	49871225	49871525	H278	0	.	49871225	49871225	200,0,0
chr18	66543305	66543605	H279	0	.	66543305	66543305	200,0,0
chr14	63890265	63890565	H28	0	.	63890265	63890265	200,0,0
chr2	124348285	124348585	H280	0	.	124348285	124348285	200,0,0
chr2	127963305	127963605	H281	0	.	127963305	127963305	200,0,0
chr3	107644305	107644605	H282	0	.	107644305	107644305	200,0,0
chr5	150185265	150185565	H283	0	.	150185265	150185265	200,0,0
chr6	91157545	91157845	H284	0	.	91157545	91157545	200,0,0
chr9	24701485	24701785	H285	0	.	24701485	24701485	200,0,0
chr1	43316705	43317005	H286	0	.	43316705	43316705	200,0,0
chr11	46089685	46089985	H287	0	.	46089685	46089685	200,0,0
chr14	55585425	55585725	H288	0	.	55585425	55585425	200,0,0
chr18	25007185	25007485	H289	0	.	25007185	25007185	200,0,0
chr16	33582005	33582305	H29	0	.	33582005	33582005	200,0,0
chr18	38955665	38955965	H290	0	.	38955665	38955665	200,0,0
chr2	75047145	75047445	H291	0	.	75047145	75047145	200,0,0
chr8	15058865	15059165	H292	0	.	15058865	15058865	200,0,0
chr1	193770245	193770545	H293	0	.	193770245	193770245	200,0,0
chr10	53595805	53596105	H294	0	.	53595805	53595805	200,0,0
chr10	93895725	93896025	H295	0	.	93895725	93895725	200,0,0
chr12	10521225	10521525	H296	0	.	10521225	10521225	200,0,0
chr12	109546585	109546885	H297	0	.	109546585	109546585	200,0,0
chr13	41825065	41825365	H298	0	.	41825065	41825065	200,0,0
chr15	85008685	85008985	H299	0	.	85008685	85008685	200,0,0
chr13	102820525	102820825	H3	0	.	102820525	102820525	200,0,0
chr15	103146405	103146705	H30	0	.	103146405	103146405	200,0,0
chr19	40509605	40509905	H300	0	.	40509605	40509605	200,0,0
chr3	107632545	107632845	H301	0	.	107632545	107632545	200,0,0
chr4	53651525	53651825	H302	0	.	53651525	53651525	200,0,0
chr4	97924585	97924885	H303	0	.	97924585	97924585	200,0,0
chr5	53863805	53864105	H304	0	.	53863805	53863805	200,0,0
chr5	58135225	58135525	H305	0	.	58135225	58135225	200,0,0
chr6	139857585	139857885	H306	0	.	139857585	139857585	200,0,0
chr7	104411345	104411645	H307	0	.	104411345	104411345	200,0,0
chr8	71426885	71427185	H308	0	.	71426885	71426885	200,0,0
chr8	75023545	75023845	H309	0	.	75023545	75023545	200,0,0
chr11	89962665	89962965	H31	0	.	89962665	89962665	200,0,0
chr8	130357885	130358185	H310	0	.	130357885	130357885	200,0,0
chr10	96852305	96852605	H311	0	.	96852305	96852305	200,0,0
chr11	75726505	75726805	H312	0	.	75726505	75726505	200,0,0
chr11	109749045	109749345	H313	0	.	109749045	109749045	200,0,0
chr15	101139385	101139685	H314	0	.	101139385	101139385	200,0,0
chr18	35211705	35212005	H315	0	.	35211705	35211705	200,0,0
chr19	36757105	36757405	H316	0	.	36757105	36757105	200,0,0
chr2	163218245	163218545	H317	0	.	163218245	163218245	200,0,0
chr1	108479785	108480085	H318	0	.	108479785	108479785	200,0,0
chr1	155769845	155770145	H319	0	.	155769845	155769845	200,0,0
chr16	24492665	24492965	H32	0	.	24492665	24492665	200,0,0
chr10	67565405	67565705	H320	0	.	67565405	67565405	200,0,0
chr10	75050565	75050865	H321	0	.	75050565	75050565	200,0,0
chr11	45924125	45924425	H322	0	.	45924125	45924125	200,0,0
chr11	85835925	85836225	H323	0	.	85835925	85835925	200,0,0
chr12	82251925	82252225	H324	0	.	82251925	82251925	200,0,0
chr13	60173045	60173345	H325	0	.	60173045	60173045	200,0,0
chr14	12695845	12696145	H326	0	.	12695845	12695845	200,0,0
chr15	62034345	62034645	H327	0	.	62034345	62034345	200,0,0
chr18	16874065	16874365	H328	0	.	16874065	16874065	200,0,0
chr18	66446385	66446685	H329	0	.	66446385	66446385	200,0,0
chr13	94905105	94905405	H33	0	.	94905105	94905105	200,0,0
chr4	154515165	154515465	H330	0	.	154515165	154515165	200,0,0
chr8	11913545	11913845	H331	0	.	11913545	11913545	200,0,0
chr9	109752005	109752305	H332	0	.	109752005	109752005	200,0,0
chr10	8488505	8488805	H333	0	.	8488505	8488505	200,0,0
chr11	51156765	51157065	H334	0	.	51156765	51156765	200,0,0
chr11	98239165	98239465	H335	0	.	98239165	98239165	200,0,0
chr12	8454565	8454865	H336	0	.	8454565	8454565	200,0,0
chr12	32388865	32389165	H337	0	.	32388865	32388865	200,0,0
chr12	53978025	53978325	H338	0	.	53978025	53978025	200,0,0
chr13	13577985	13578285	H339	0	.	13577985	13577985	200,0,0
chr14	63866565	63866865	H34	0	.	63866565	63866565	200,0,0
chr14	27984405	27984705	H340	0	.	27984405	27984405	200,0,0
chr15	7139725	7140025	H341	0	.	7139725	7139725	200,0,0
chr15	78954225	78954525	H342	0	.	78954225	78954225	200,0,0
chr19	17304525	17304825	H343	0	.	17304525	17304525	200,0,0
chr2	117854685	117854985	H344	0	.	117854685	117854685	200,0,0
chr2	121375405	121375705	H345	0	.	121375405	121375405	200,0,0
chr4	100022805	100023105	H346	0	.	100022805	100022805	200,0,0
chr6	53287425	53287725	H347	0	.	53287425	53287425	200,0,0
chr9	43290785	43291085	H348	0	.	43290785	43290785	200,0,0
chr1	135367345	135367645	H349	0	.	135367345	135367345	200,0,0
chr2	103767685	103767985	H35	0	.	103767685	103767685	200,0,0
chr12	30709305	30709605	H350	0	.	30709305	30709305	200,0,0
chr15	34895685	34895985	H351	0	.	34895685	34895685	200,0,0
chr15	99174945	99175245	H352	0	.	99174945	99174945	200,0,0
chr17	27005765	27006065	H353	0	.	27005765	27005765	200,0,0
chr17	66029525	66029825	H354	0	.	66029525	66029525	200,0,0
chr19	56849225	56849525	H355	0	.	56849225	56849225	200,0,0
chr2	131227585	131227885	H356	0	.	131227585	131227585	200,0,0
chr5	101016665	101016965	H357	0	.	101016665	101016665	200,0,0
chr7	88711825	88712125	H358	0	.	88711825	88711825	200,0,0
chr8	27669725	27670025	H359	0	.	27669725	27669725	200,0,0
chr6	108609705	108610005	H36	0	.	108609705	108609705	200,0,0
chr10	4325285	4325585	H360	0	.	4325285	4325285	200,0,0
chr12	104590965	104591265	H361	0	.	104590965	104590965	200,0,0
chr13	32328225	32328525	H362	0	.	32328225	32328225	200,0,0
chr19	53791045	53791345	H363	0	.	53791045	53791045	200,0,0
chr2	21089545	21089845	H364	0	.	21089545	21089545	200,0,0
chr2	172912865	172913165	H365	0	.	172912865	172912865	200,0,0
chr3	37241785	37242085	H366	0	.	37241785	37241785	200,0,0
chr4	47657965	47658265	H367	0	.	47657965	47657965	200,0,0
chr4	129989865	129990165	H368	0	.	129989865	129989865	200,0,0
chr4	141204145	141204445	H369	0	.	141204145	141204145	200,0,0
chr6	122458545	122458845	H37	0	.	122458545	122458545	200,0,0
chr5	24046205	24046505	H370	0	.	24046205	24046205	200,0,0
chr8	23576285	23576585	H371	0	.	23576285	23576285	200,0,0
chr8	80548865	80549165	H372	0	.	80548865	80548865	200,0,0
chr8	95565125	95565425	H373	0	.	95565125	95565125	200,0,0
chr1	40320545	40320845	H374	0	.	40320545	40320545	200,0,0
chr1	134243125	134243425	H375	0	.	134243125	134243125	200,0,0
chr10	9322665	9322965	H376	0	.	9322665	9322665	200,0,0
chr11	111741505	111741805	H377	0	.	111741505	111741505	200,0,0
chr11	116509045	116509345	H378	0	.	116509045	116509045	200,0,0
chr13	29291625	29291925	H379	0	.	29291625	29291625	200,0,0
chr10	77543045	77543345	H38	0	.	77543045	77543045	200,0,0
chr15	34349705	34350005	H380	0	.	34349705	34349705	200,0,0
chr17	73325665	73325965	H381	0	.	73325665	73325665	200,0,0
chr18	66389345	66389645	H382	0	.	66389345	66389345	200,0,0
chr2	117666185	117666485	H383	0	.	117666185	117666185	200,0,0
chr2	150598485	150598785	H384	0	.	150598485	150598485	200,0,0
chr3	85322005	85322305	H385	0	.	85322005	85322005	200,0,0
chr4	40820345	40820645	H386	0	.	40820345	40820345	200,0,0
chr4	137032905	137033205	H387	0	.	137032905	137032905	200,0,0
chr7	17497765	17498065	H388	0	.	17497765	17497765	200,0,0
chr9	25381345	25381645	H389	0	.	25381345	25381345	200,0,0
chr18	5806365	5806665	H39	0	.	5806365	5806365	200,0,0
chr1	34186585	34186885	H390	0	.	34186585	34186585	200,0,0
chr1	43304445	43304745	H391	0	.	43304445	43304445	200,0,0
chr1	136806645	136806945	H392	0	.	136806645	136806645	200,0,0
chr11	118309765	118310065	H393	0	.	118309765	118309765	200,0,0
chr12	113905805	113906105	H394	0	.	113905805	113905805	200,0,0
chr13	53128985	53129285	H395	0	.	53128985	53128985	200,0,0
chr14	35387325	35387625	H396	0	.	35387325	35387325	200,0,0
chr15	85075665	85075965	H397	0	.	85075665	85075665	200,0,0
chr16	33683365	33683665	H398	0	.	33683365	33683365	200,0,0
chr17	34822725	34823025	H399	0	.	34822725	34822725	200,0,0
chr14	70605965	70606265	H4	0	.	70605965	70605965	200,0,0
chr9	36855145	36855445	H40	0	.	36855145	36855145	200,0,0
chr19	53182425	53182725	H400	0	.	53182425	53182425	200,0,0
chr2	109925885	109926185	H401	0	.	109925885	109925885	200,0,0
chr2	151764625	151764925	H402	0	.	151764625	151764625	200,0,0
chr3	19544285	19544585	H403	0	.	19544285	19544285	200,0,0
chr4	137029605	137029905	H404	0	.	137029605	137029605	200,0,0
chr5	122959665	122959965	H405	0	.	122959665	122959665	200,0,0
chr8	59799565	59799865	H406	0	.	59799565	59799565	200,0,0
chr8	125739365	125739665	H407	0	.	125739365	125739365	200,0,0
chr1	193123165	193123465	H408	0	.	193123165	193123165	200,0,0
chr10	42654565	42654865	H409	0	.	42654565	42654565	200,0,0
chr12	74126505	74126805	H41	0	.	74126505	74126505	200,0,0
chr11	98244965	98245265	H410	0	.	98244965	98244965	200,0,0
chr11	109783665	109783965	H411	0	.	109783665	109783665	200,0,0
chr12	74882425	74882725	H412	0	.	74882425	74882425	200,0,0
chr13	43229905	43230205	H413	0	.	43229905	43229905	200,0,0
chr15	12679745	12680045	H414	0	.	12679745	12679745	200,0,0
chr18	32078285	32078585	H415	0	.	32078285	32078285	200,0,0
chr19	10087245	10087545	H416	0	.	10087245	10087245	200,0,0
chr19	40800645	40800945	H417	0	.	40800645	40800645	200,0,0
chr2	21086085	21086385	H418	0	.	21086085	21086085	200,0,0
chr2	75180005	75180305	H419	0	.	75180005	75180005	200,0,0
chr15	52799405	52799705	H42	0	.	52799405	52799405	200,0,0
chr2	75195065	75195365	H420	0	.	75195065	75195065	200,0,0
chr4	94469985	94470285	H421	0	.	94469985	94469985	200,0,0
chr6	142470185	142470485	H422	0	.	142470185	142470185	200,0,0
chr7	71032245	71032545	H423	0	.	71032245	71032245	200,0,0
chr8	46692425	46692725	H424	0	.	46692425	46692425	200,0,0
chr9	32778965	32779265	H425	0	.	32778965	32778965	200,0,0
chr11	90004365	90004665	H426	0	.	90004365	90004365	200,0,0
chr11	116952745	116953045	H427	0	.	116952745	116952745	200,0,0
chr12	56498545	56498845	H428	0	.	56498545	56498545	200,0,0
chr12	93024825	93025125	H429	0	.	93024825	93024825	200,0,0
chr4	150087065	150087365	H43	0	.	150087065	150087065	200,0,0
chr14	29346165	29346465	H430	0	.	29346165	29346165	200,0,0
chr15	12688305	12688605	H431	0	.	12688305	12688305	200,0,0
chr18	39391805	39392105	H432	0	.	39391805	39391805	200,0,0
chr2	35283105	35283405	H433	0	.	35283105	35283105	200,0,0
chr3	101197685	101197985	H434	0	.	101197685	101197685	200,0,0
chr5	73273645	73273945	H435	0	.	73273645	73273645	200,0,0
chr9	79813285	79813585	H436	0	.	79813285	79813285	200,0,0
chr9	104032505	104032805	H437	0	.	104032505	104032505	200,0,0
chr1	137435045	137435345	H438	0	.	137435045	137435045	200,0,0
chr11	61308205	61308505	H439	0	.	61308205	61308205	200,0,0
chr9	23200685	23200985	H44	0	.	23200685	23200685	200,0,0
chr11	69265645	69265945	H440	0	.	69265645	69265645	200,0,0
chr11	82724545	82724845	H441	0	.	82724545	82724545	200,0,0
chr13	29282425	29282725	H442	0	.	29282425	29282425	200,0,0
chr13	92016425	92016725	H443	0	.	92016425	92016425	200,0,0
chr14	26595905	26596205	H444	0	.	26595905	26595905	200,0,0
chr14	67976445	67976745	H445	0	.	67976445	67976445	200,0,0
chr15	83963965	83964265	H446	0	.	83963965	83963965	200,0,0
chr17	9949605	9949905	H447	0	.	9949605	9949605	200,0,0
chr19	24081565	24081865	H448	0	.	24081565	24081565	200,0,0
chr2	167623625	167623925	H449	0	.	167623625	167623625	200,0,0
chr2	163224985	163225285	H45	0	.	163224985	163224985	200,0,0
chr3	33888225	33888525	H450	0	.	33888225	33888225	200,0,0
chr3	63243705	63244005	H451	0	.	63243705	63243705	200,0,0
chr4	149223165	149223465	H452	0	.	149223165	149223165	200,0,0
chr5	122970885	122971185	H453	0	.	122970885	122970885	200,0,0
chr7	26514925	26515225	H454	0	.	26514925	26514925	200,0,0
chr7	78728645	78728945	H455	0	.	78728645	78728645	200,0,0
chr7	109537685	109537985	H456	0	.	109537685	109537685	200,0,0
chr8	96123765	96124065	H457	0	.	96123765	96123765	200,0,0
chr8	111267145	111267445	H458	0	.	111267145	111267145	200,0,0
chr9	63725625	63725925	H459	0	.	63725625	63725625	200,0,0
chr9	69012505	69012805	H46	0	.	69012505	69012505	200,0,0
chr9	123400125	123400425	H460	0	.	123400125	123400125	200,0,0
chrX	137070145	137070445	H461	0	.	137070145	137070145	200,0,0
chr1	130953845	130954145	H462	0	.	130953845	130953845	200,0,0
chr1	153443725	153444025	H463	0	.	153443725	153443725	200,0,0
chr10	70287165	70287465	H464	0	.	70287165	70287165	200,0,0
chr11	74251785	74252085	H465	0	.	74251785	74251785	200,0,0
chr14	68286685	68286985	H466	0	.	68286685	68286685	200,0,0
chr17	14654345	14654645	H467	0	.	14654345	14654345	200,0,0
chr17	16009125	16009425	H468	0	.	16009125	16009125	200,0,0
chr19	45101785	45102085	H469	0	.	45101785	45101785	200,0,0
chr3	87942485	87942785	H47	0	.	87942485	87942485	200,0,0
chr2	30444445	30444745	H470	0	.	30444445	30444445	200,0,0
chr5	112239525	112239825	H471	0	.	112239525	112239525	200,0,0
chr7	19668665	19668965	H472	0	.	19668665	19668665	200,0,0
chr7	135681225	135681525	H473	0	.	135681225	135681225	200,0,0
chr1	92572765	92573065	H474	0	.	92572765	92572765	200,0,0
chr10	76195585	76195885	H475	0	.	76195585	76195585	200,0,0
chr11	62757045	62757345	H476	0	.	62757045	62757045	200,0,0
chr12	76411845	76412145	H477	0	.	76411845	76411845	200,0,0
chr13	81079685	81079985	H478	0	.	81079685	81079685	200,0,0
chr13	98629025	98629325	H479	0	.	98629025	98629025	200,0,0
chr6	115188725	115189025	H48	0	.	115188725	115188725	200,0,0
chr14	102315125	102315425	H480	0	.	102315125	102315125	200,0,0
chr15	85017365	85017665	H481	0	.	85017365	85017365	200,0,0
chr17	71388165	71388465	H482	0	.	71388165	71388165	200,0,0
chr18	5806645	5806945	H483	0	.	5806645	5806645	200,0,0
chr18	33782665	33782965	H484	0	.	33782665	33782665	200,0,0
chr19	53735205	53735505	H485	0	.	53735205	53735205	200,0,0
chr2	7163325	7163625	H486	0	.	7163325	7163325	200,0,0
chr2	76819825	76820125	H487	0	.	76819825	76819825	200,0,0
chr2	103739925	103740225	H488	0	.	103739925	103739925	200,0,0
chr2	166183305	166183605	H489	0	.	166183305	166183305	200,0,0
chr12	46150885	46151185	H49	0	.	46150885	46150885	200,0,0
chr3	58608685	58608985	H490	0	.	58608685	58608685	200,0,0
chr3	109112205	109112505	H491	0	.	109112205	109112205	200,0,0
chr4	57619145	57619445	H492	0	.	57619145	57619145	200,0,0
chr4	63203345	63203645	H493	0	.	63203345	63203345	200,0,0
chr5	129571845	129572145	H494	0	.	129571845	129571845	200,0,0
chr6	42324805	42325105	H495	0	.	42324805	42324805	200,0,0
chr6	53664985	53665285	H496	0	.	53664985	53664985	200,0,0
chr7	124637745	124638045	H497	0	.	124637745	124637745	200,0,0
chr8	42091565	42091865	H498	0	.	42091565	42091565	200,0,0
chr9	67397085	67397385	H499	0	.	67397085	67397085	200,0,0
chr11	109736365	109736665	H5	0	.	109736365	109736365	200,0,0
chr3	79856845	79857145	H50	0	.	79856845	79856845	200,0,0
chr9	90442805	90443105	H500	0	.	90442805	90442805	200,0,0
chr9	102874825	102875125	H501	0	.	102874825	102874825	200,0,0
chr1	175981725	175982025	H502	0	.	175981725	175981725	200,0,0
chr12	86536125	86536425	H503	0	.	86536125	86536125	200,0,0
chr12	108991245	108991545	H504	0	.	108991245	108991245	200,0,0
chr13	46509045	46509345	H505	0	.	46509045	46509045	200,0,0
chr17	80136985	80137285	H506	0	.	80136985	80136985	200,0,0
chr19	41081805	41082105	H507	0	.	41081805	41081805	200,0,0
chr19	41226925	41227225	H508	0	.	41226925	41226925	200,0,0
chr2	30118345	30118645	H509	0	.	30118345	30118345	200,0,0
chr7	28119525	28119825	H51	0	.	28119525	28119525	200,0,0
chr3	21852385	21852685	H510	0	.	21852385	21852385	200,0,0
chr3	100797065	100797365	H511	0	.	100797065	100797065	200,0,0
chr3	103452465	103452765	H512	0	.	103452465	103452465	200,0,0
chr4	94405505	94405805	H513	0	.	94405505	94405505	200,0,0
chr4	140977325	140977625	H514	0	.	140977325	140977325	200,0,0
chr4	141152925	141153225	H515	0	.	141152925	141152925	200,0,0
chr5	52743105	52743405	H516	0	.	52743105	52743105	200,0,0
chr7	82007745	82008045	H517	0	.	82007745	82007745	200,0,0
chr7	99606325	99606625	H518	0	.	99606325	99606325	200,0,0
chr8	48869885	48870185	H519	0	.	48869885	48869885	200,0,0
chr10	118236805	118237105	H52	0	.	118236805	118236805	200,0,0
chr8	95349965	95350265	H520	0	.	95349965	95349965	200,0,0
chr8	127892225	127892525	H521	0	.	127892225	127892225	200,0,0
chr9	44282445	44282745	H522	0	.	44282445	44282445	200,0,0
chr1	91441685	91441985	H523	0	.	91441685	91441685	200,0,0
chr1	190989045	190989345	H524	0	.	190989045	190989045	200,0,0
chr10	13216185	13216485	H525	0	.	13216185	13216185	200,0,0
chr10	22607305	22607605	H526	0	.	22607305	22607305	200,0,0
chr10	82631525	82631825	H527	0	.	82631525	82631525	200,0,0
chr12	37995285	37995585	H528	0	.	37995285	37995285	200,0,0
chr12	55387965	55388265	H529	0	.	55387965	55387965	200,0,0
chr16	43710785	43711085	H53	0	.	43710785	43710785	200,0,0
chr13	32348045	32348345	H530	0	.	32348045	32348045	200,0,0
chr15	3459145	3459445	H531	0	.	3459145	3459145	200,0,0
chr15	25656705	25657005	H532	0	.	25656705	25656705	200,0,0
chr16	94689325	94689625	H533	0	.	94689325	94689325	200,0,0
chr17	12932405	12932705	H534	0	.	12932405	12932405	200,0,0
chr18	14008945	14009245	H535	0	.	14008945	14008945	200,0,0
chr19	38031785	38032085	H536	0	.	38031785	38031785	200,0,0
chr19	53787865	53788165	H537	0	.	53787865	53787865	200,0,0
chr19	56810785	56811085	H538	0	.	56810785	56810785	200,0,0
chr2	31226905	31227205	H539	0	.	31226905	31226905	200,0,0
chr16	57928005	57928305	H54	0	.	57928005	57928005	200,0,0
chr2	128333365	128333665	H540	0	.	128333365	128333365	200,0,0
chr2	150652205	150652505	H541	0	.	150652205	150652205	200,0,0
chr4	34855385	34855685	H542	0	.	34855385	34855385	200,0,0
chr4	141207265	141207565	H543	0	.	141207265	141207265	200,0,0
chr5	113628545	113628845	H544	0	.	113628545	113628545	200,0,0
chr7	30988365	30988665	H545	0	.	30988365	30988365	200,0,0
chr7	90917905	90918205	H546	0	.	90917905	90917905	200,0,0
chr1	92105065	92105365	H547	0	.	92105065	92105065	200,0,0
chr1	170164505	170164805	H548	0	.	170164505	170164505	200,0,0
chr10	24313385	24313685	H549	0	.	24313385	24313385	200,0,0
chr5	74120885	74121185	H55	0	.	74120885	74120885	200,0,0
chr11	31563465	31563765	H550	0	.	31563465	31563465	200,0,0
chr12	37740985	37741285	H551	0	.	37740985	37740985	200,0,0
chr12	88272865	88273165	H552	0	.	88272865	88272865	200,0,0
chr15	32216105	32216405	H553	0	.	32216105	32216105	200,0,0
chr16	56610645	56610945	H554	0	.	56610645	56610645	200,0,0
chr17	84392425	84392725	H555	0	.	84392425	84392425	200,0,0
chr2	33016185	33016485	H556	0	.	33016185	33016185	200,0,0
chr2	76820525	76820825	H557	0	.	76820525	76820525	200,0,0
chr2	163189025	163189325	H558	0	.	163189025	163189025	200,0,0
chr3	21171145	21171445	H559	0	.	21171145	21171145	200,0,0
chr13	12462165	12462465	H56	0	.	12462165	12462165	200,0,0
chr3	101608305	101608605	H560	0	.	101608305	101608305	200,0,0
chr3	101903245	101903545	H561	0	.	101903245	101903245	200,0,0
chr5	39520205	39520505	H562	0	.	39520205	39520205	200,0,0
chr5	43847305	43847605	H563	0	.	43847305	43847305	200,0,0
chr5	107491305	107491605	H564	0	.	107491305	107491305	200,0,0
chr5	113325325	113325625	H565	0	.	113325325	113325325	200,0,0
chr6	24523385	24523685	H566	0	.	24523385	24523385	200,0,0
chr6	119130225	119130525	H567	0	.	119130225	119130225	200,0,0
chr9	120570405	120570705	H568	0	.	120570405	120570405	200,0,0
chr1	43253845	43254145	H569	0	.	43253845	43253845	200,0,0
chr13	16807445	16807745	H57	0	.	16807445	16807445	200,0,0
chr1	75545925	75546225	H570	0	.	75545925	75545925	200,0,0
chr1	137758665	137758965	H571	0	.	137758665	137758665	200,0,0
chr1	172629685	172629985	H572	0	.	172629685	172629685	200,0,0
chr10	85629625	85629925	H573	0	.	85629625	85629625	200,0,0
chr11	35065485	35065785	H574	0	.	35065485	35065485	200,0,0
chr11	65057105	65057405	H575	0	.	65057105	65057105	200,0,0
chr12	74487865	74488165	H576	0	.	74487865	74487865	200,0,0
chr13	109243585	109243885	H577	0	.	109243585	109243585	200,0,0
chr15	34264945	34265245	H578	0	.	34264945	34264945	200,0,0
chr16	16256805	16257105	H579	0	.	16256805	16256805	200,0,0
chr18	56918005	56918305	H58	0	.	56918005	56918005	200,0,0
chr17	7814145	7814445	H580	0	.	7814145	7814145	200,0,0
chr17	75922065	75922365	H581	0	.	75922065	75922065	200,0,0
chr2	31197745	31198045	H582	0	.	31197745	31197745	200,0,0
chr2	85121265	85121565	H583	0	.	85121265	85121265	200,0,0
chr2	135397285	135397585	H584	0	.	135397285	135397285	200,0,0
chr2	163170725	163171025	H585	0	.	163170725	163170725	200,0,0
chr3	95493505	95493805	H586	0	.	95493505	95493505	200,0,0
chr5	52741765	52742065	H587	0	.	52741765	52741765	200,0,0
chr5	114100325	114100625	H588	0	.	114100325	114100325	200,0,0
chr6	21061285	21061585	H589	0	.	21061285	21061285	200,0,0
chr15	51195005	51195305	H59	0	.	51195005	51195005	200,0,0
chr6	51031085	51031385	H590	0	.	51031085	51031085	200,0,0
chr6	137506245	137506545	H591	0	.	137506245	137506245	200,0,0
chr8	74855605	74855905	H592	0	.	74855605	74855605	200,0,0
chr9	33741705	33742005	H593	0	.	33741705	33741705	200,0,0
chr9	45176685	45176985	H594	0	.	45176685	45176685	200,0,0
chr9	58147185	58147485	H595	0	.	58147185	58147185	200,0,0
chr9	90093645	90093945	H596	0	.	90093645	90093645	200,0,0
chr9	100371785	100372085	H597	0	.	100371785	100371785	200,0,0
chr9	118940965	118941265	H598	0	.	118940965	118940965	200,0,0
chr1	40862225	40862525	H599	0	.	40862225	40862225	200,0,0
chr11	112711885	112712185	H6	0	.	112711885	112711885	200,0,0
chr7	143569545	143569845	H60	0	.	143569545	143569545	200,0,0
chr1	76547525	76547825	H600	0	.	76547525	76547525	200,0,0
chr1	145902725	145903025	H601	0	.	145902725	145902725	200,0,0
chr1	187987125	187987425	H602	0	.	187987125	187987125	200,0,0
chr10	4318605	4318905	H603	0	.	4318605	4318605	200,0,0
chr11	62939265	62939565	H604	0	.	62939265	62939265	200,0,0
chr11	101117805	101118105	H605	0	.	101117805	101117805	200,0,0
chr12	45960465	45960765	H606	0	.	45960465	45960465	200,0,0
chr12	86226105	86226405	H607	0	.	86226105	86226105	200,0,0
chr13	104144885	104145185	H608	0	.	104144885	104144885	200,0,0
chr15	52970485	52970785	H609	0	.	52970485	52970485	200,0,0
chr15	94078805	94079105	H61	0	.	94078805	94078805	200,0,0
chr15	58104445	58104745	H610	0	.	58104445	58104445	200,0,0
chr15	97979825	97980125	H611	0	.	97979825	97979825	200,0,0
chr15	103147645	103147945	H612	0	.	103147645	103147645	200,0,0
chr16	25263065	25263365	H613	0	.	25263065	25263065	200,0,0
chr16	57863325	57863625	H614	0	.	57863325	57863325	200,0,0
chr18	5802945	5803245	H615	0	.	5802945	5802945	200,0,0
chr18	63708545	63708845	H616	0	.	63708545	63708545	200,0,0
chr18	69281165	69281465	H617	0	.	69281165	69281165	200,0,0
chr2	131304265	131304565	H618	0	.	131304265	131304265	200,0,0
chr2	148687485	148687785	H619	0	.	148687485	148687485	200,0,0
chr17	26626025	26626325	H62	0	.	26626025	26626025	200,0,0
chr3	28040625	28040925	H620	0	.	28040625	28040625	200,0,0
chr3	100926465	100926765	H621	0	.	100926465	100926465	200,0,0
chr3	102474025	102474325	H622	0	.	102474025	102474025	200,0,0
chr4	108917145	108917445	H623	0	.	108917145	108917145	200,0,0
chr4	148252985	148253285	H624	0	.	148252985	148252985	200,0,0
chr5	21038825	21039125	H625	0	.	21038825	21038825	200,0,0
chr5	35975545	35975845	H626	0	.	35975545	35975545	200,0,0
chr5	74641825	74642125	H627	0	.	74641825	74641825	200,0,0
chr6	8055965	8056265	H628	0	.	8055965	8055965	200,0,0
chr6	119146465	119146765	H629	0	.	119146465	119146465	200,0,0
chr18	56920565	56920865	H63	0	.	56920565	56920565	200,0,0
chr8	109523045	109523345	H630	0	.	109523045	109523045	200,0,0
chr9	119388465	119388765	H631	0	.	119388465	119388465	200,0,0
chr1	60919845	60920145	H632	0	.	60919845	60919845	200,0,0
chr1	92740405	92740705	H633	0	.	92740405	92740405	200,0,0
chr10	13768345	13768645	H634	0	.	13768345	13768345	200,0,0
chr10	67223225	67223525	H635	0	.	67223225	67223225	200,0,0
chr10	77549405	77549705	H636	0	.	77549405	77549405	200,0,0
chr10	83358465	83358765	H637	0	.	83358465	83358465	200,0,0
chr11	9327465	9327765	H638	0	.	9327465	9327465	200,0,0
chr11	44762205	44762505	H639	0	.	44762205	44762205	200,0,0
chr3	123024585	123024885	H64	0	.	123024585	123024585	200,0,0
chr11	81875785	81876085	H640	0	.	81875785	81875785	200,0,0
chr11	120112445	120112745	H641	0	.	120112445	120112445	200,0,0
chr12	8451825	8452125	H642	0	.	8451825	8451825	200,0,0
chr12	103824845	103825145	H643	0	.	103824845	103824845	200,0,0
chr13	99424265	99424565	H644	0	.	99424265	99424265	200,0,0
chr13	120128665	120128965	H645	0	.	120128665	120128665	200,0,0
chr16	33582665	33582965	H646	0	.	33582665	33582665	200,0,0
chr17	82243185	82243485	H647	0	.	82243185	82243185	200,0,0
chr18	24059165	24059465	H648	0	.	24059165	24059165	200,0,0
chr2	31625085	31625385	H649	0	.	31625085	31625085	200,0,0
chr5	77610565	77610865	H65	0	.	77610565	77610565	200,0,0
chr2	59365085	59365385	H650	0	.	59365085	59365085	200,0,0
chr2	168482145	168482445	H651	0	.	168482145	168482145	200,0,0
chr3	75500665	75500965	H652	0	.	75500665	75500665	200,0,0
chr3	107631425	107631725	H653	0	.	107631425	107631425	200,0,0
chr4	58588725	58589025	H654	0	.	58588725	58588725	200,0,0
chr5	31947285	31947585	H655	0	.	31947285	31947285	200,0,0
chr5	150191565	150191865	H656	0	.	150191565	150191565	200,0,0
chr6	35312665	35312965	H657	0	.	35312665	35312665	200,0,0
chr7	37382025	37382325	H658	0	.	37382025	37382025	200,0,0
chr7	125964825	125965125	H659	0	.	125964825	125964825	200,0,0
chr6	91496165	91496465	H66	0	.	91496165	91496165	200,0,0
chr9	65096165	65096465	H660	0	.	65096165	65096165	200,0,0
chr9	105737985	105738285	H661	0	.	105737985	105737985	200,0,0
chr1	22060185	22060485	H662	0	.	22060185	22060185	200,0,0
chr1	40886285	40886585	H663	0	.	40886285	40886285	200,0,0
chr1	45369765	45370065	H664	0	.	45369765	45369765	200,0,0
chr1	137487385	137487685	H665	0	.	137487385	137487385	200,0,0
chr10	7008665	7008965	H666	0	.	7008665	7008665	200,0,0
chr10	53057385	53057685	H667	0	.	53057385	53057385	200,0,0
chr10	60277185	60277485	H668	0	.	60277185	60277185	200,0,0
chr10	74997725	74998025	H669	0	.	74997725	74997725	200,0,0
chr10	79499565	79499865	H67	0	.	79499565	79499565	200,0,0
chr11	31506405	31506705	H670	0	.	31506405	31506405	200,0,0
chr12	8452125	8452425	H671	0	.	8452125	8452125	200,0,0
chr13	12221465	12221765	H672	0	.	12221465	12221465	200,0,0
chr14	12520125	12520425	H673	0	.	12520125	12520125	200,0,0
chr15	12357725	12358025	H674	0	.	12357725	12357725	200,0,0
chr15	76868485	76868785	H675	0	.	76868485	76868485	200,0,0
chr16	87268205	87268505	H676	0	.	87268205	87268205	200,0,0
chr17	15599165	15599465	H677	0	.	15599165	15599165	200,0,0
chr17	34700845	34701145	H678	0	.	34700845	34700845	200,0,0
chr17	73575305	73575605	H679	0	.	73575305	73575305	200,0,0
chr15	73576825	73577125	H68	0	.	73576825	73576825	200,0,0
chr18	50158465	50158765	H680	0	.	50158465	50158465	200,0,0
chr19	40406465	40406765	H681	0	.	40406465	40406465	200,0,0
chr19	53200265	53200565	H682	0	.	53200265	53200265	200,0,0
chr19	55262025	55262325	H683	0	.	55262025	55262025	200,0,0
chr19	56453065	56453365	H684	0	.	56453065	56453065	200,0,0
chr2	16656065	16656365	H685	0	.	16656065	16656065	200,0,0
chr2	46298085	46298385	H686	0	.	46298085	46298085	200,0,0
chr2	59239045	59239345	H687	0	.	59239045	59239045	200,0,0
chr2	75268285	75268585	H688	0	.	75268285	75268285	200,0,0
chr2	113879905	113880205	H689	0	.	113879905	113879905	200,0,0
chr3	109089585	109089885	H69	0	.	109089585	109089585	200,0,0
chr2	124510185	124510485	H690	0	.	124510185	124510185	200,0,0
chr3	127228405	127228705	H691	0	.	127228405	127228405	200,0,0
chr3	145535745	145536045	H692	0	.	145535745	145535745	200,0,0
chr4	53119645	53119945	H693	0	.	53119645	53119645	200,0,0
chr4	114268085	114268385	H694	0	.	114268085	114268085	200,0,0
chr5	104557785	104558085	H695	0	.	104557785	104557785	200,0,0
chr5	111919645	111919945	H696	0	.	111919645	111919645	200,0,0
chr6	15693345	15693645	H697	0	.	15693345	15693345	200,0,0
chr6	117387805	117388105	H698	0	.	117387805	117387805	200,0,0
chr9	78598205	78598505	H699	0	.	78598205	78598205	200,0,0
chr3	107507325	107507625	H7	0	.	107507325	107507325	200,0,0
chr7	117441205	117441505	H70	0	.	117441205	117441205	200,0,0
chr1	77045625	77045925	H700	0	.	77045625	77045625	200,0,0
chr1	120255705	120256005	H701	0	.	120255705	120255705	200,0,0
chr11	32998545	32998845	H702	0	.	32998545	32998545	200,0,0
chr11	90188185	90188485	H703	0	.	90188185	90188185	200,0,0
chr12	109546845	109547145	H704	0	.	109546845	109546845	200,0,0
chr13	17029325	17029625	H705	0	.	17029325	17029325	200,0,0
chr13	42047905	42048205	H706	0	.	42047905	42047905	200,0,0
chr14	26179305	26179605	H707	0	.	26179305	26179305	200,0,0
chr14	70610165	70610465	H708	0	.	70610165	70610165	200,0,0
chr15	73336505	73336805	H709	0	.	73336505	73336505	200,0,0
chr5	75075685	75075985	H71	0	.	75075685	75075685	200,0,0
chr15	73560565	73560865	H710	0	.	73560565	73560565	200,0,0
chr16	4500665	4500965	H711	0	.	4500665	4500665	200,0,0
chr17	31521865	31522165	H712	0	.	31521865	31521865	200,0,0
chr17	45952905	45953205	H713	0	.	45952905	45952905	200,0,0
chr17	84509745	84510045	H714	0	.	84509745	84509745	200,0,0
chr18	9732065	9732365	H715	0	.	9732065	9732065	200,0,0
chr18	44470945	44471245	H716	0	.	44470945	44470945	200,0,0
chr19	30047925	30048225	H717	0	.	30047925	30047925	200,0,0
chr19	41229205	41229505	H718	0	.	41229205	41229205	200,0,0
chr2	50798765	50799065	H719	0	.	50798765	50798765	200,0,0
chr6	34700825	34701125	H72	0	.	34700825	34700825	200,0,0
chr3	97673745	97674045	H720	0	.	97673745	97673745	200,0,0
chr4	6606585	6606885	H721	0	.	6606585	6606585	200,0,0
chr4	135209265	135209565	H722	0	.	135209265	135209265	200,0,0
chr5	75167265	75167565	H723	0	.	75167265	75167265	200,0,0
chr5	107580445	107580745	H724	0	.	107580445	107580445	200,0,0
chr7	17491125	17491425	H725	0	.	17491125	17491125	200,0,0
chr7	51728645	51728945	H726	0	.	51728645	51728645	200,0,0
chr7	139819185	139819485	H727	0	.	139819185	139819185	200,0,0
chr9	22750125	22750425	H728	0	.	22750125	22750125	200,0,0
chr9	71437645	71437945	H729	0	.	71437645	71437645	200,0,0
chr7	146494985	146495285	H73	0	.	146494985	146494985	200,0,0
chr9	119541265	119541565	H730	0	.	119541265	119541265	200,0,0
chr1	75356685	75356985	H731	0	.	75356685	75356685	200,0,0
chr1	79914365	79914665	H732	0	.	79914365	79914365	200,0,0
chr1	80214865	80215165	H733	0	.	80214865	80214865	200,0,0
chr1	137052885	137053185	H734	0	.	137052885	137052885	200,0,0
chr1	153808405	153808705	H735	0	.	153808405	153808405	200,0,0
chr10	39187165	39187465	H736	0	.	39187165	39187165	200,0,0
chr11	6190185	6190485	H737	0	.	6190185	6190185	200,0,0
chr11	63904725	63905025	H738	0	.	63904725	63904725	200,0,0
chr12	112225345	112225645	H739	0	.	112225345	112225345	200,0,0
chr1	92735305	92735605	H74	0	.	92735305	92735305	200,0,0
chr14	48252165	48252465	H740	0	.	48252165	48252165	200,0,0
chr16	89991905	89992205	H741	0	.	89991905	89991905	200,0,0
chr17	28639165	28639465	H742	0	.	28639165	28639165	200,0,0
chr18	75077285	75077585	H743	0	.	75077285	75077285	200,0,0
chr2	31203985	31204285	H744	0	.	31203985	31203985	200,0,0
chr2	68216405	68216705	H745	0	.	68216405	68216405	200,0,0
chr2	167096745	167097045	H746	0	.	167096745	167096745	200,0,0
chr3	27541325	27541625	H747	0	.	27541325	27541325	200,0,0
chr4	6635745	6636045	H748	0	.	6635745	6635745	200,0,0
chr4	58630165	58630465	H749	0	.	58630165	58630165	200,0,0
chr10	97052265	97052565	H75	0	.	97052265	97052265	200,0,0
chr4	81558665	81558965	H750	0	.	81558665	81558665	200,0,0
chr4	140186545	140186845	H751	0	.	140186545	140186545	200,0,0
chr5	20789525	20789825	H752	0	.	20789525	20789525	200,0,0
chr5	72826345	72826645	H753	0	.	72826345	72826345	200,0,0
chr5	122287565	122287865	H754	0	.	122287565	122287565	200,0,0
chr5	124111565	124111865	H755	0	.	124111565	124111565	200,0,0
chr6	29384305	29384605	H756	0	.	29384305	29384305	200,0,0
chr6	82701825	82702125	H757	0	.	82701825	82701825	200,0,0
chr6	118273105	118273405	H758	0	.	118273105	118273105	200,0,0
chr8	90328325	90328625	H759	0	.	90328325	90328325	200,0,0
chr4	105858425	105858725	H76	0	.	105858425	105858425	200,0,0
chr8	104474545	104474845	H760	0	.	104474545	104474545	200,0,0
chr8	109358845	109359145	H761	0	.	109358845	109358845	200,0,0
chr1	38378765	38379065	H762	0	.	38378765	38378765	200,0,0
chr1	169005905	169006205	H763	0	.	169005905	169005905	200,0,0
chr1	187960565	187960865	H764	0	.	187960565	187960565	200,0,0
chr10	70277405	70277705	H765	0	.	70277405	70277405	200,0,0
chr11	6182965	6183265	H766	0	.	6182965	6182965	200,0,0
chr11	19501565	19501865	H767	0	.	19501565	19501565	200,0,0
chr11	56813025	56813325	H768	0	.	56813025	56813025	200,0,0
chr12	77619885	77620185	H769	0	.	77619885	77619885	200,0,0
chr5	104665785	104666085	H77	0	.	104665785	104665785	200,0,0
chr13	71807365	71807665	H770	0	.	71807365	71807365	200,0,0
chr14	79519185	79519485	H771	0	.	79519185	79519185	200,0,0
chr14	80090065	80090365	H772	0	.	80090065	80090065	200,0,0
chr15	95599125	95599425	H773	0	.	95599125	95599125	200,0,0
chr16	18746765	18747065	H774	0	.	18746765	18746765	200,0,0
chr16	19969645	19969945	H775	0	.	19969645	19969645	200,0,0
chr17	31522245	31522545	H776	0	.	31522245	31522245	200,0,0
chr18	69826365	69826665	H777	0	.	69826365	69826365	200,0,0
chr19	41234925	41235225	H778	0	.	41234925	41234925	200,0,0
chr2	148323685	148323985	H779	0	.	148323685	148323685	200,0,0
chr5	112228705	112229005	H78	0	.	112228705	112228705	200,0,0
chr2	180119945	180120245	H780	0	.	180119945	180119945	200,0,0
chr4	126935825	126936125	H781	0	.	126935825	126935825	200,0,0
chr4	150471205	150471505	H782	0	.	150471205	150471205	200,0,0
chr5	74700845	74701145	H783	0	.	74700845	74700845	200,0,0
chr5	104557225	104557525	H784	0	.	104557225	104557225	200,0,0
chr6	51113345	51113645	H785	0	.	51113345	51113345	200,0,0
chr6	91478225	91478525	H786	0	.	91478225	91478225	200,0,0
chr6	135348885	135349185	H787	0	.	135348885	135348885	200,0,0
chr7	74176245	74176545	H788	0	.	74176245	74176245	200,0,0
chr7	106294405	106294705	H789	0	.	106294405	106294405	200,0,0
chr14	34493885	34494185	H79	0	.	34493885	34493885	200,0,0
chr9	61275765	61276065	H790	0	.	61275765	61275765	200,0,0
chr9	110858425	110858725	H791	0	.	110858425	110858425	200,0,0
chr1	84446465	84446765	H792	0	.	84446465	84446465	200,0,0
chr10	111250905	111251205	H793	0	.	111250905	111250905	200,0,0
chr11	98917425	98917725	H794	0	.	98917425	98917425	200,0,0
chr11	114576905	114577205	H795	0	.	114576905	114576905	200,0,0
chr12	86526785	86527085	H796	0	.	86526785	86526785	200,0,0
chr12	114376065	114376365	H797	0	.	114376065	114376065	200,0,0
chr13	44255185	44255485	H798	0	.	44255185	44255185	200,0,0
chr13	44424565	44424865	H799	0	.	44424565	44424565	200,0,0
chr14	105759765	105760065	H8	0	.	105759765	105759765	200,0,0
chr5	20775245	20775545	H80	0	.	20775245	20775245	200,0,0
chr13	60529025	60529325	H800	0	.	60529025	60529025	200,0,0
chr14	26528365	26528665	H801	0	.	26528365	26528365	200,0,0
chr15	58032805	58033105	H802	0	.	58032805	58032805	200,0,0
chr15	99300605	99300905	H803	0	.	99300605	99300605	200,0,0
chr16	5169065	5169365	H804	0	.	5169065	5169065	200,0,0
chr17	67520145	67520445	H805	0	.	67520145	67520145	200,0,0
chr19	40452225	40452525	H806	0	.	40452225	40452225	200,0,0
chr2	50661205	50661505	H807	0	.	50661205	50661205	200,0,0
chr2	84610705	84611005	H808	0	.	84610705	84610705	200,0,0
chr2	180128045	180128345	H809	0	.	180128045	180128045	200,0,0
chr5	30191005	30191305	H81	0	.	30191005	30191005	200,0,0
chr3	20691525	20691825	H810	0	.	20691525	20691525	200,0,0
chr4	141682885	141683185	H811	0	.	141682885	141682885	200,0,0
chr5	19912465	19912765	H812	0	.	19912465	19912465	200,0,0
chr5	107579985	107580285	H813	0	.	107579985	107579985	200,0,0
chr6	120594425	120594725	H814	0	.	120594425	120594425	200,0,0
chr9	110303225	110303525	H815	0	.	110303225	110303225	200,0,0
chr9	120128625	120128925	H816	0	.	120128625	120128625	200,0,0
chr1	4534125	4534425	H817	0	.	4534125	4534125	200,0,0
chr1	73408845	73409145	H818	0	.	73408845	73408845	200,0,0
chr10	87129505	87129805	H819	0	.	87129505	87129505	200,0,0
chr14	105803505	105803805	H82	0	.	105803505	105803505	200,0,0
chr10	90415885	90416185	H820	0	.	90415885	90415885	200,0,0
chr10	90493945	90494245	H821	0	.	90493945	90493945	200,0,0
chr10	90906145	90906445	H822	0	.	90906145	90906145	200,0,0
chr11	31502825	31503125	H823	0	.	31502825	31502825	200,0,0
chr11	101091305	101091605	H824	0	.	101091305	101091305	200,0,0
chr11	116956025	116956325	H825	0	.	116956025	116956025	200,0,0
chr12	88033985	88034285	H826	0	.	88033985	88033985	200,0,0
chr13	102784905	102785205	H827	0	.	102784905	102784905	200,0,0
chr15	11676505	11676805	H828	0	.	11676505	11676505	200,0,0
chr15	68243745	68244045	H829	0	.	68243745	68243745	200,0,0
chr15	83056945	83057245	H83	0	.	83056945	83056945	200,0,0
chr15	68709245	68709545	H830	0	.	68709245	68709245	200,0,0
chr16	33595365	33595665	H831	0	.	33595365	33595365	200,0,0
chr16	86127685	86127985	H832	0	.	86127685	86127685	200,0,0
chr17	13680845	13681145	H833	0	.	13680845	13680845	200,0,0
chr17	28104985	28105285	H834	0	.	28104985	28104985	200,0,0
chr18	66327145	66327445	H835	0	.	66327145	66327145	200,0,0
chr2	44840645	44840945	H836	0	.	44840645	44840645	200,0,0
chr2	173257765	173258065	H837	0	.	173257765	173257765	200,0,0
chr3	53439925	53440225	H838	0	.	53439925	53439925	200,0,0
chr3	78703825	78704125	H839	0	.	78703825	78703825	200,0,0
chr6	24547505	24547805	H84	0	.	24547505	24547505	200,0,0
chr3	100874905	100875205	H840	0	.	100874905	100874905	200,0,0
chr5	53934685	53934985	H841	0	.	53934685	53934685	200,0,0
chr5	107611765	107612065	H842	0	.	107611765	107611765	200,0,0
chr5	148391325	148391625	H843	0	.	148391325	148391325	200,0,0
chr6	53168805	53169105	H844	0	.	53168805	53168805	200,0,0
chr6	82994825	82995125	H845	0	.	82994825	82994825	200,0,0
chr6	97391365	97391665	H846	0	.	97391365	97391365	200,0,0
chr7	17201005	17201305	H847	0	.	17201005	17201005	200,0,0
chr7	91162185	91162485	H848	0	.	91162185	91162185	200,0,0
chr7	108150805	108151105	H849	0	.	108150805	108150805	200,0,0
chr8	59692825	59693125	H85	0	.	59692825	59692825	200,0,0
chr7	140939085	140939385	H850	0	.	140939085	140939085	200,0,0
chr8	26367225	26367525	H851	0	.	26367225	26367225	200,0,0
chr8	47312005	47312305	H852	0	.	47312005	47312005	200,0,0
chr8	77777985	77778285	H853	0	.	77777985	77777985	200,0,0
chr9	32483725	32484025	H854	0	.	32483725	32483725	200,0,0
chr9	44749905	44750205	H855	0	.	44749905	44749905	200,0,0
chr9	58150885	58151185	H856	0	.	58150885	58150885	200,0,0
chr9	116317305	116317605	H857	0	.	116317305	116317305	200,0,0
chr9	119379165	119379465	H858	0	.	119379165	119379165	200,0,0
chr1	133585085	133585385	H859	0	.	133585085	133585085	200,0,0
chr18	46969525	46969825	H86	0	.	46969525	46969525	200,0,0
chr10	3610165	3610465	H860	0	.	3610165	3610165	200,0,0
chr10	38525905	38526205	H861	0	.	38525905	38525905	200,0,0
chr11	108827065	108827365	H862	0	.	108827065	108827065	200,0,0
chr11	109554065	109554365	H863	0	.	109554065	109554065	200,0,0
chr11	117284785	117285085	H864	0	.	117284785	117284785	200,0,0
chr12	9927245	9927545	H865	0	.	9927245	9927245	200,0,0
chr12	33445965	33446265	H866	0	.	33445965	33445965	200,0,0
chr12	86500625	86500925	H867	0	.	86500625	86500625	200,0,0
chr13	103805265	103805565	H868	0	.	103805265	103805265	200,0,0
chr14	52534745	52535045	H869	0	.	52534745	52534745	200,0,0
chr2	33015905	33016205	H87	0	.	33015905	33015905	200,0,0
chr14	58564725	58565025	H870	0	.	58564725	58564725	200,0,0
chr15	4697705	4698005	H871	0	.	4697705	4697705	200,0,0
chr15	42599965	42600265	H872	0	.	42599965	42599965	200,0,0
chr15	76031025	76031325	H873	0	.	76031025	76031025	200,0,0
chr16	25238445	25238745	H874	0	.	25238445	25238445	200,0,0
chr16	35130325	35130625	H875	0	.	35130325	35130325	200,0,0
chr17	67622365	67622665	H876	0	.	67622365	67622365	200,0,0
chr17	84292545	84292845	H877	0	.	84292545	84292545	200,0,0
chr19	57340945	57341245	H878	0	.	57340945	57340945	200,0,0
chr2	51144225	51144525	H879	0	.	51144225	51144225	200,0,0
chr2	119880525	119880825	H88	0	.	119880525	119880525	200,0,0
chr2	165954305	165954605	H880	0	.	165954305	165954305	200,0,0
chr3	37709745	37710045	H881	0	.	37709745	37709745	200,0,0
chr3	101084825	101085125	H882	0	.	101084825	101084825	200,0,0
chr3	101899425	101899725	H883	0	.	101899425	101899425	200,0,0
chr3	107507025	107507325	H884	0	.	107507025	107507025	200,0,0
chr3	151514345	151514645	H885	0	.	151514345	151514345	200,0,0
chr4	104943925	104944225	H886	0	.	104943925	104943925	200,0,0
chr5	30879705	30880005	H887	0	.	30879705	30879705	200,0,0
chr5	103020485	103020785	H888	0	.	103020485	103020485	200,0,0
chr5	124654465	124654765	H889	0	.	124654465	124654465	200,0,0
chr2	167400405	167400705	H89	0	.	167400405	167400405	200,0,0
chr5	131993605	131993905	H890	0	.	131993605	131993605	200,0,0
chr6	51053305	51053605	H891	0	.	51053305	51053305	200,0,0
chr6	94571105	94571405	H892	0	.	94571105	94571105	200,0,0
chr8	107133125	107133425	H893	0	.	107133125	107133125	200,0,0
chr8	129307965	129308265	H894	0	.	129307965	129307965	200,0,0
chrX	130138905	130139205	H895	0	.	130138905	130138905	200,0,0
chr1	161820665	161820965	H896	0	.	161820665	161820665	200,0,0
chr1	187474805	187475105	H897	0	.	187474805	187474805	200,0,0
chr10	6950925	6951225	H898	0	.	6950925	6950925	200,0,0
chr10	42754705	42755005	H899	0	.	42754705	42754705	200,0,0
chr16	57928525	57928825	H9	0	.	57928525	57928525	200,0,0
chr6	55195705	55196005	H90	0	.	55195705	55195705	200,0,0
chr10	70277665	70277965	H900	0	.	70277665	70277665	200,0,0
chr11	45883125	45883425	H901	0	.	45883125	45883125	200,0,0
chr11	103037485	103037785	H902	0	.	103037485	103037485	200,0,0
chr13	16808985	16809285	H903	0	.	16808985	16808985	200,0,0
chr14	23779465	23779765	H904	0	.	23779465	23779465	200,0,0
chr14	63937085	63937385	H905	0	.	63937085	63937085	200,0,0
chr14	73265385	73265685	H906	0	.	73265385	73265385	200,0,0
chr15	5188585	5188885	H907	0	.	5188585	5188585	200,0,0
chr15	36048165	36048465	H908	0	.	36048165	36048165	200,0,0
chr15	69133545	69133845	H909	0	.	69133545	69133545	200,0,0
chr19	27411065	27411365	H91	0	.	27411065	27411065	200,0,0
chr15	97979545	97979845	H910	0	.	97979545	97979545	200,0,0
chr15	101126605	101126905	H911	0	.	101126605	101126605	200,0,0
chr16	29745625	29745925	H912	0	.	29745625	29745625	200,0,0
chr2	137261945	137262245	H913	0	.	137261945	137261945	200,0,0
chr3	19576725	19577025	H914	0	.	19576725	19576725	200,0,0
chr3	37503985	37504285	H915	0	.	37503985	37503985	200,0,0
chr3	115888185	115888485	H916	0	.	115888185	115888185	200,0,0
chr3	122737745	122738045	H917	0	.	122737745	122737745	200,0,0
chr4	47246405	47246705	H918	0	.	47246405	47246405	200,0,0
chr4	108882885	108883185	H919	0	.	108882885	108882885	200,0,0
chr4	97809565	97809865	H92	0	.	97809565	97809565	200,0,0
chr4	119963765	119964065	H920	0	.	119963765	119963765	200,0,0
chr4	132781965	132782265	H921	0	.	132781965	132781965	200,0,0
chr4	147884765	147885065	H922	0	.	147884765	147884765	200,0,0
chr5	70055265	70055565	H923	0	.	70055265	70055265	200,0,0
chr5	122971105	122971405	H924	0	.	122971105	122971105	200,0,0
chr6	86726045	86726345	H925	0	.	86726045	86726045	200,0,0
chr6	91556665	91556965	H926	0	.	91556665	91556665	200,0,0
chr7	100130405	100130705	H927	0	.	100130405	100130405	200,0,0
chr7	117842345	117842645	H928	0	.	117842345	117842345	200,0,0
chr7	122610325	122610625	H929	0	.	122610325	122610325	200,0,0
chr11	7715825	7716125	H93	0	.	7715825	7715825	200,0,0
chr9	9192765	9193065	H930	0	.	9192765	9192765	200,0,0
chr9	22875485	22875785	H931	0	.	22875485	22875485	200,0,0
chr9	118646625	118646925	H932	0	.	118646625	118646625	200,0,0
chr1	37559205	37559505	H933	0	.	37559205	37559205	200,0,0
chr1	37689305	37689605	H934	0	.	37689305	37689305	200,0,0
chr1	40726865	40727165	H935	0	.	40726865	40726865	200,0,0
chr1	116678505	116678805	H936	0	.	116678505	116678505	200,0,0
chr1	186295265	186295565	H937	0	.	186295265	186295265	200,0,0
chr10	5570625	5570925	H938	0	.	5570625	5570625	200,0,0
chr10	67165565	67165865	H939	0	.	67165565	67165565	200,0,0
chr3	83255265	83255565	H94	0	.	83255265	83255265	200,0,0
chr10	76157645	76157945	H940	0	.	76157645	76157645	200,0,0
chr10	91933865	91934165	H941	0	.	91933865	91933865	200,0,0
chr11	107922865	107923165	H942	0	.	107922865	107922865	200,0,0
chr12	30720225	30720525	H943	0	.	30720225	30720225	200,0,0
chr12	77654965	77655265	H944	0	.	77654965	77654965	200,0,0
chr12	81605825	81606125	H945	0	.	81605825	81605825	200,0,0
chr12	104600585	104600885	H946	0	.	104600585	104600585	200,0,0
chr13	15390285	15390585	H947	0	.	15390285	15390285	200,0,0
chr13	32772045	32772345	H948	0	.	32772045	32772045	200,0,0
chr13	54275865	54276165	H949	0	.	54275865	54275865	200,0,0
chr1	122150345	122150645	H95	0	.	122150345	122150345	200,0,0
chr13	59600825	59601125	H950	0	.	59600825	59600825	200,0,0
chr13	104060965	104061265	H951	0	.	104060965	104060965	200,0,0
chr14	35357705	35358005	H952	0	.	35357705	35357705	200,0,0
chr14	103867945	103868245	H953	0	.	103867945	103867945	200,0,0
chr17	16011445	16011745	H954	0	.	16011445	16011445	200,0,0
chr19	23001285	23001585	H955	0	.	23001285	23001285	200,0,0
chr2	103417965	103418265	H956	0	.	103417965	103417965	200,0,0
chr2	121377045	121377345	H957	0	.	121377045	121377045	200,0,0
chr2	127562445	127562745	H958	0	.	127562445	127562445	200,0,0
chr2	159533925	159534225	H959	0	.	159533925	159533925	200,0,0
chr10	17516985	17517285	H96	0	.	17516985	17516985	200,0,0
chr2	163186645	163186945	H960	0	.	163186645	163186645	200,0,0
chr2	163212645	163212945	H961	0	.	163212645	163212645	200,0,0
chr2	180041605	180041905	H962	0	.	180041605	180041605	200,0,0
chr3	30143525	30143825	H963	0	.	30143525	30143525	200,0,0
chr4	47651785	47652085	H964	0	.	47651785	47651785	200,0,0
chr4	55674945	55675245	H965	0	.	55674945	55674945	200,0,0
chr5	77572145	77572445	H966	0	.	77572145	77572145	200,0,0
chr5	93449205	93449505	H967	0	.	93449205	93449205	200,0,0
chr5	131403745	131404045	H968	0	.	131403745	131403745	200,0,0
chr6	91137965	91138265	H969	0	.	91137965	91137965	200,0,0
chr15	103198585	103198885	H97	0	.	103198585	103198585	200,0,0
chr6	91671245	91671545	H970	0	.	91671245	91671245	200,0,0
chr7	37095205	37095505	H971	0	.	37095205	37095205	200,0,0
chr7	37448545	37448845	H972	0	.	37448545	37448545	200,0,0
chr7	74899505	74899805	H973	0	.	74899505	74899505	200,0,0
chr7	90713445	90713745	H974	0	.	90713445	90713445	200,0,0
chr7	104640965	104641265	H975	0	.	104640965	104640965	200,0,0
chr8	11292645	11292945	H976	0	.	11292645	11292645	200,0,0
chr8	15062645	15062945	H977	0	.	15062645	15062645	200,0,0
chr9	24703725	24704025	H978	0	.	24703725	24703725	200,0,0
chr9	35101065	35101365	H979	0	.	35101065	35101065	200,0,0
chr16	44996925	44997225	H98	0	.	44996925	44996925	200,0,0
chr9	41323265	41323565	H980	0	.	41323265	41323265	200,0,0
chr9	84632885	84633185	H981	0	.	84632885	84632885	200,0,0
chr1	73223685	73223985	H982	0	.	73223685	73223685	200,0,0
chr1	74130985	74131285	H983	0	.	74130985	74130985	200,0,0
chr1	75583405	75583705	H984	0	.	75583405	75583405	200,0,0
chr1	145923205	145923505	H985	0	.	145923205	145923205	200,0,0
chr1	182403745	182404045	H986	0	.	182403745	182403745	200,0,0
chr1	194476125	194476425	H987	0	.	194476125	194476125	200,0,0
chr10	66334485	66334785	H988	0	.	66334485	66334485	200,0,0
chr10	84043925	84044225	H989	0	.	84043925	84043925	200,0,0
chr2	21085865	21086165	H99	0	.	21085865	21085865	200,0,0
chr10	97049905	97050205	H990	0	.	97049905	97049905	200,0,0
chr10	116187185	116187485	H991	0	.	116187185	116187185	200,0,0
chr11	94311265	94311565	H992	0	.	94311265	94311265	200,0,0
chr12	111326085	111326385	H993	0	.	111326085	111326085	200,0,0
chr13	9426085	9426385	H994	0	.	9426085	9426085	200,0,0
chr13	38492585	38492885	H995	0	.	38492585	38492585	200,0,0
chr13	44153725	44154025	H996	0	.	44153725	44153725	200,0,0
chr15	85431205	85431505	H997	0	.	85431205	85431205	200,0,0
chr15	85926525	85926825	H998	0	.	85926525	85926525	200,0,0
[truncated: 2,001 more rows]

## Sheet: MiSeq_on-target
track name="MiSeq_on-target" description="On-target_captured-and-cloned_fragments" visibility=full
chr1	4347674	4348146	CCGTTATTGTGCTTA	0	+
chr1	4347680	4348105	AGTACGTTATTTCTT	0	-
chr1	4350073	4350599	TTCCAGTGTAAAGCC	0	+
chr1	4350219	4350596	CCACCACCACGAGTC	0	-
chr1	4350221	4350665	CAAGCGTGCGTAAGG	0	-
chr1	4373578	4373971	GCCGAAACTTAGCAA	0	+
chr1	4373578	4374015	GTCCCCCACCTCCTA	0	+
chr1	4373589	4374024	GACGCGAGTAAGTGC	0	+
chr1	4373601	4374004	GAAAGTAAGGAATTG	0	+
chr1	4373796	4374170	TACACAAAATTAGTT	0	+
chr1	4533983	4534465	GCTCAAAGCGGCACA	0	+
chr1	4533997	4534548	ATTTTTTTGAAACTG	0	+
chr1	4534030	4534446	CCACGGACCAGCGCC	0	+
chr1	4534097	4534614	GTGTATATAACTTAC	0	+
chr1	4651639	4652177	TCACTTGAACCCTGC	0	-
chr1	4651691	4652101	CCCACAGCAACCATG	0	+
chr1	4651705	4652287	ACGTAAACTAAAACT	0	-
chr1	4651720	4652209	CTATGGACGTAGAAG	0	+
chr1	4651735	4652069	CCCTTTTCCCCTCTT	0	+
chr1	4651735	4652086	TCCTTCAGACACGTC	0	+
chr1	4651867	4652242	ATAAACCATGATTTC	0	+
chr1	4651995	4652377	CCATCGTCATTCTGA	0	-
chr1	4791616	4792101	TCCAAATATAACGAT	0	+
chr1	4791669	4792072	CCGAGTCATAACGAG	0	+
chr1	6809618	6810283	TGGTCTTGATTTGTC	0	-
chr1	6809911	6810352	AACGTACCTTACGCC	0	+
chr1	6809918	6810426	ACGACTTGAAAGAAG	0	-
chr1	6809947	6810543	AGCGCTAAAAACGTT	0	-
chr1	6809977	6810394	TCTCCGGTCTAGCCG	0	+
chr1	6810027	6810556	TTACCCAAACACTGG	0	+
chr1	6810097	6810536	CGCCATGACCACCTT	0	-
chr1	6810120	6810617	GGGAGACGGACCCAC	0	-
chr1	6810150	6810472	GACCAAAAATAAAAA	0	-
chr1	9937774	9938171	GCATTCCTACCATTC	0	-
chr1	9978555	9979108	TACTTTACACGCCAA	0	-
chr1	9978673	9979249	TGTAAAAGTCCCTAT	0	+
chr1	9978715	9979160	ATAAACCCCAGACTG	0	-
chr1	9978887	9979260	GCGCGTCCTGCTACA	0	-
chr1	9978906	9979293	CCCTACAACCTTTCA	0	+
chr1	9978985	9979449	AATAGACACCATGAT	0	-
chr1	9979052	9979538	TTTTAGAACCCGATT	0	-
chr1	9979059	9979548	TCATCTGTTAATTTC	0	+
chr1	12754076	12754703	CCCGACCCCCAAACA	0	+
chr1	12754307	12754686	CATCCTCCGCTGATA	0	-
chr1	12754315	12754756	ACCACGATACCTACG	0	-
chr1	12754316	12754717	TACGGAGCCGGCATG	0	-
chr1	12754446	12754838	CAGAGTTCAACTCGT	0	+
chr1	12761101	12761734	ACCGTGCGTATGACC	0	-
chr1	12761144	12761812	AACTTATCTTGTCGT	0	+
chr1	12761331	12761836	CGGTAGTTCTTATAG	0	-
chr1	12761363	12761820	ACGTCGGATTTAGGG	0	+
chr1	12761415	12761920	AAATTTGTTTCTAGG	0	+
chr1	12761535	12761954	TCCCTAACACGTTCC	0	+
chr1	12761595	12762104	CCTAAATAGACCGGA	0	-
chr1	12761612	12762124	CCAGGAGATATTCGA	0	+
chr1	17049685	17050214	GCCCATCCCGACCTC	0	+
chr1	17049789	17050355	AACCGGCGCCCTTTA	0	-
chr1	17049795	17050193	AACCTTCAACTAACC	0	-
chr1	17049856	17050327	GTCCAAGTCAGAAAG	0	+
chr1	17049882	17050482	TTCGTCTGAATTAA	0	+
chr1	17049930	17050426	CAACTTTCGGGAGTG	0	+
chr1	17049940	17050343	TACCCGGCTTTCGTG	0	-
chr1	17049974	17050457	CCTTTGACCCCACTG	0	-
chr1	17049974	17050602	GACTTAGAGGTACAA	0	-
chr1	17049984	17050426	GCCAGGTTAAGAGGC	0	+
chr1	17049994	17050456	CCAGCCTTCATTACC	0	+
chr1	17050027	17050468	CCAAACCACACGGGT	0	-
chr1	17050055	17050507	ATCATGCAAAGGTCC	0	-
chr1	17050061	17050471	TCACTCCGACCTCAC	0	-
chr1	17050066	17050709	GACCACAATCGAAT	0	-
chr1	17050072	17050532	GACTATTCGGCACAC	0	-
chr1	17050075	17050521	AGTGACCACCTGCAA	0	-
chr1	17050089	17050516	GACACTATTCCACAA	0	+
chr1	17050094	17050472	GTAGACACTTCATTC	0	+
chr1	17050097	17050451	CTTATCAACGCCCAG	0	+
chr1	17050101	17050669	AACCACCCCGGGGGC	0	-
chr1	17050141	17050489	GCTGGATCTGAAGTT	0	+
chr1	17050167	17050714	ACTCGACAGGTAAAT	0	+
chr1	17050194	17050697	CCTGGCACCAAACCC	0	+
chr1	17050268	17050904	AACTGTACGATGCCC	0	-
chr1	17050271	17050869	GCGAGCGGAGAGGTC	0	-
chr1	17050305	17050795	TAGTCTTGGGTGTAC	0	-
chr1	17050305	17050832	CCACGGGTTCGTTAG	0	-
chr1	17050311	17050836	CCCTATGATCCCCAC	0	+
chr1	17050369	17050864	TTCACAGGGTCGCAT	0	-
chr1	17050371	17050808	GACAGAAGTGCGTTG	0	-
chr1	17050419	17050824	GTAAACTTATATATA	0	+
chr1	17050424	17050946	GCTGTCAGTTCCTAC	0	+
chr1	17050439	17050928	CGGGCTGGATAGTCA	0	-
chr1	17050469	17050991	CACTTTGCCGGACGG	0	-
chr1	17050493	17051097	ACCCTTCAGCCTGTT	0	+
chr1	17050495	17050887	CAGGGCCCATGCAGT	0	+
chr1	17050496	17050919	TGCCCCAGATTCCCA	0	+
chr1	17050501	17050921	ACCACGCGGAATGGT	0	+
chr1	17050503	17050981	CTCCTCCTCCTCAGC	0	-
chr1	17050506	17050936	TTCCTTGGCTCGTAA	0	-
chr1	17050524	17050973	TAAGCTCACCATTTC	0	-
chr1	17050537	17050908	GCGGTGCGGGAGCGG	0	-
chr1	17050562	17051098	AGTATAGGGGCGGCA	0	+
chr1	17050578	17051058	TCTGTAACCTGAAGT	0	+
chr1	17050632	17051096	GATCCACAAAGGCTG	0	+
chr1	17050635	17051174	GCCCTCCAGTGCGTC	0	-
chr1	17050641	17051206	GATCCCCACAGGCAT	0	+
chr1	17050641	17051260	TACGACCGACTCCAC	0	-
chr1	17050642	17051032	GAATGACCTCCATCG	0	-
chr1	17050646	17051071	CCCCGTGAGCCAGCT	0	+
chr1	17050658	17051244	ACCCAATAGCTCCCA	0	-
chr1	17050733	17051111	ATCGTCCACATGAAT	0	-
chr1	20121884	20122337	TTCCAATACCCTTGA	0	-
chr1	20121920	20122341	CAGGCGCCCCTAGAC	0	-
chr1	22059695	22060319	CCCATAACGCTATTG	0	-
chr1	22059747	22060320	GCCCACATCCACGAC	0	+
chr1	22059869	22060354	CTCTAGGTTTGGTAC	0	+
chr1	22059869	22060356	CCACGACAGCCGACG	0	+
chr1	22059881	22060316	ATATTCCATTTAGCA	0	+
chr1	22059909	22060376	CCTTAGTAAACTTTT	0	-
chr1	22059909	22060426	TCCCCACAGATCATG	0	+
chr1	22059988	22060527	GACCGCAAGGATCTA	0	-
chr1	22059990	22060393	CCTTCCAATCCGACG	0	+
chr1	22059992	22060457	AGCGCCTCCTCCGGC	0	+
chr1	22060000	22060584	GGTTAGCTCACAGGA	0	+
chr1	22060005	22060609	CTCGCGCTATGTAAT	0	+
chr1	22060007	22060523	ACTAGGCTTATCGTC	0	-
chr1	22060012	22060532	CTTCATCAACAGAAT	0	-
chr1	22060015	22060452	CCGAATCACAATCGC	0	+
chr1	22060018	22060581	TACGGAAAACATTCC	0	-
chr1	22060030	22060450	AACGCCGTCAGGTGC	0	+
chr1	22060034	22060513	ATGTGACTGGGGGGC	0	+
chr1	22060038	22060586	TCGACCTTACCACGT	0	-
chr1	22060039	22060571	GGTTATTAAGACGCT	0	+
chr1	22060055	22060609	TCCGCGTAACGCCCC	0	-
chr1	22060075	22060556	GAAAATGTGCCCCAA	0	+
chr1	22060077	22060538	ATCGGGTATCCAAAT	0	+
chr1	22060094	22060596	TATCGGTTCGTCAGT	0	-
chr1	22060106	22060522	CGAGATTATGCGACG	0	-
chr1	22060106	22060607	CAGGAAACGAGGGGG	0	+
chr1	22060116	22060504	CCGACACATCCTTAG	0	-
chr1	22060117	22060633	ACCCAGCCCGGAGAT	0	-
chr1	22060121	22060366	GCTACGTGGCGTGTC	0	+
chr1	22060121	22060601	TGCTATTGCGTGGCC	0	+
chr1	22060128	22060606	ATGACCCCCCGCTCG	0	-
chr1	22060139	22060626	CCTTGAAGCCCCATC	0	-
chr1	22060141	22060639	TACCCACCTACCTTG	0	+
chr1	22060148	22060529	GCGCGTCAGCGGAAG	0	+
chr1	22060158	22060513	CTAACTCGTTATTCG	0	+
chr1	22060158	22060641	TGTTATATATCCCCT	0	+
chr1	22060164	22060594	CAAAAAGTAATTACA	0	+
chr1	22060173	22060542	CTGCTTTCAAGGAAT	0	+
chr1	22060183	22060589	GACATTTGGGGATTG	0	-
chr1	22060194	22060722	AGCCCCTGAACTACC	0	+
chr1	22060201	22060610	GCCGTTTACCCTACG	0	+
chr1	22060214	22060685	GCCACAGCACCGAAG	0	-
chr1	22060218	22060715	CCCTTACGGCAAGGC	0	-
chr1	22060230	22060665	TGTTGAGCATCGCCA	0	+
chr1	22060264	22060646	CTGCGTTCTCCGCGC	0	+
chr1	22060272	22060706	GCCATCCCACGTATA	0	-
chr1	22060299	22060783	TACCACTATGTGATC	0	-
chr1	22060300	22060694	CGACCCTCTACTACA	0	+
chr1	22519143	22519718	AACGCCACACATCCG	0	-
chr1	22519146	22519665	ATCCGAAGGTTAGTA	0	+
chr1	22519186	22519665	CGTATTATCCAGCAT	0	-
chr1	22519263	22519794	CTCCCCAGGTGTCAA	0	+
chr1	22519275	22519707	TCTACATAAGACTGC	0	-
chr1	22519291	22519761	GCCGGCTGCCGCACG	0	-
chr1	22519306	22519792	AGGCGATTATGGGGG	0	+
chr1	22519324	22519787	TCACAACTTTTTTCA	0	+
chr1	22519333	22519705	TCCTCAACACCACCC	0	+
chr1	22519355	22519755	CGGGGGCTGTGGCCA	0	-
chr1	22519372	22519852	GACTCCACCCGTCTC	0	+
chr1	22519382	22519877	GCCCCCGCGTTTTCC	0	+
chr1	22519470	22520010	AACATGGATAAATAG	0	+
chr1	22519556	22519973	CATATATGATAAGGC	0	+
chr1	22519565	22520104	ACGCGTCATGTATAA	0	+
chr1	22638707	22639171	TTTAAACTGTCGTCA	0	-
chr1	22638752	22639175	GATGTCCAGTCTAGT	0	-
chr1	23660528	23660982	GAGTATGGGTGTAAA	0	-
chr1	24229811	24230296	CACATCCGAGACCCT	0	-
chr1	24229870	24230290	TCCGTCGCACAGCAA	0	+
chr1	24286712	24287220	ATCTTGATTAATGCA	0	+
chr1	24286877	24287324	CCATGGGAAACCGCC	0	-
chr1	24286925	24287459	ACAATATCCGTGCGT	0	+
chr1	25142305	25142829	GGTCATGCCATAATC	0	+
chr1	25142321	25142788	AATGAAGACTATGCA	0	+
chr1	25142330	25142792	ACCGCGATGTGCAGT	0	-
chr1	25142350	25142791	GAGGGGTGAAGAGAG	0	+
chr1	25142375	25142855	TCCAACAAGGGTGTC	0	+
chr1	25142560	25143094	CCTAAGGGACCCAGG	0	-
chr1	25142565	25143065	ACTGAGACCAAGAAA	0	-
chr1	25142568	25142992	CGACCCTAAGCTCTT	0	+
chr1	25142605	25143101	TTACCACCGCCTAGA	0	-
chr1	25142615	25143178	GCCCCCCAGAATGCA	0	+
chr1	25142636	25143141	GCCACGGTTCCAATG	0	+
chr1	28270688	28271327	TAGCTGCGGGCCGCT	0	+
chr1	28270706	28271234	CCAACGTTGGGCGCC	0	-
chr1	28270761	28271394	CTATTCCCTTACGCT	0	-
chr1	28270766	28271291	CGTTTGTGACAAAAG	0	+
chr1	28270780	28271414	CATGCATAGGGATAT	0	-
chr1	28270798	28271310	GCCAGCGGCGTAGAG	0	+
chr1	28270865	28271388	TGGGGCGTACGGAGG	0	+
chr1	28270878	28271395	GCGTATATCGCCTTC	0	-
chr1	28270919	28271311	ACGCCCTTCCTGTGCA	0	-
chr1	28270950	28271423	GCCCTGGCACATAAG	0	-
chr1	28270961	28271436	GTACCGTTTAAGTTA	0	-
chr1	28270964	28271359	TGCATTATAGCCATG	0	+
chr1	28270983	28271355	CAAGCTTATACGCTT	0	-
chr1	28270996	28271432	CCGCTAAGTTTTACT	0	-
chr1	28270999	28271314	ATCACCAACTTATCT	0	+
chr1	28270999	28271447	ATGACCATTGAGCCG	0	+
chr1	28271008	28271326	TACGGCCAACCACTC	0	+
chr1	28271027	28271487	AACCGTGGGTTGGAC	0	-
chr1	28271037	28271418	AATCAGAACATAGTT	0	+
chr1	28271038	28271449	ACCTCGAACCAGGGA	0	+
chr1	28271048	28271410	CCCCCAGAAGCCCTT	0	-
chr1	28271070	28271402	AAATAGTGTCATTCC	0	-
chr1	28271127	28271520	GGGCGGGGTCACGTG	0	-
chr1	28271160	28271637	CTCGGTTTTTCGTTG	0	+
chr1	28271166	28271631	AGGGTAATTAAAGAT	0	+
chr1	28271171	28271531	GGACTGCAGAGATTC	0	+
chr1	28271176	28271772	GGCGAACGACCCGAA	0	+
chr1	31072831	31073269	GCGCCGTTCTAACAA	0	-
chr1	31072837	31073336	CGCTGCGTATGTAAT	0	+
chr1	31072852	31073283	TTCAAAGCATGATGT	0	+
chr1	31072878	31073395	ACAGCCGGCGCTTTC	0	-
chr1	31072916	31073381	CCGGTTGCCTCAGAC	0	-
chr1	31072944	31073269	GCGCCGGTCTAACAA	0	-
chr1	31073147	31073596	TTACACACACCTCTC	0	+
chr1	34186325	34186809	GCAATGAGGCAGGGC	0	+
chr1	34186463	34186867	GGGGGGCATTGTAGA	0	-
chr1	34186463	34186883	CCTCAAGACCAGCGC	0	-
chr1	34186464	34186886	CCCACCAATCTGTTG	0	-
chr1	34186469	34187010	TGCACTCTATAACGC	0	-
chr1	34186472	34186900	CAGAACTACCCCGGC	0	-
chr1	34186491	34187138	TCCACACCGAATGGT	0	+
chr1	34186525	34187066	ACCGTTATAACCATT	0	+
chr1	34186533	34186899	ACCCCCTGCCATTTC	0	+
chr1	34186533	34187142	GGGACCGGTTAGAGT	0	+
chr1	34186544	34187039	TCCACCCTCCAACCG	0	+
chr1	34186548	34187040	GCGAAGACGCTTGGT	0	-
chr1	34186580	34187063	GCTTTCGGGGAGGGG	0	-
chr1	34186580	34187170	TCTAACAGCGCGCGG	0	-
chr1	34186590	34186999	TCGGGCCCGGAGGGC	0	-
chr1	34186606	34187236	ATTCTTTAACTGCTG	0	+
chr1	34186609	34187048	ACCTACCTGCGCTTC	0	+
chr1	34186637	34187129	AATGGACACCGGGCG	0	-
chr1	34186653	34187036	CACGCACTTACGACA	0	+
chr1	34186677	34187124	CCCCCCCCCGGCGCC	0	+
chr1	34186682	34187229	AAACTTACACAAGAG	0	+
chr1	34186692	34187142	AGGAGATCAGAAATC	0	+
chr1	34186706	34187149	AACATGTATGACGTC	0	+
chr1	34186714	34187122	CACGTGGTGGTACGG	0	-
chr1	36629221	36629711	AAGCCATCAGCATAG	0	-
chr1	36629288	36629668	CCTCCAGCTTTGGGT	0	+
chr1	36629312	36629797	TGACCCGTGCCTCCT	0	-
chr1	36629336	36629690	ACATGCCATACACAT	0	-
chr1	36629336	36629873	GTGGCGTTGCATATG	0	-
chr1	36629358	36629741	TAGGACGCAAATCCA	0	-
chr1	36629365	36629725	TCGGCACGATCTAAC	0	+
chr1	36629365	36629798	CCCCATCAAACTCAT	0	+
chr1	36629387	36629838	GCAAGGCTCGGTAGT	0	+
chr1	36629394	36629936	ACCGTCCCAGCCACT	0	+
chr1	36629403	36629821	TGCGCTTGTAGAATG	0	-
chr1	36629404	36629763	GATAAATGTGACAGA	0	-
chr1	36629419	36629925	CACCTACCAGCCGG	0	+
chr1	36629429	36629888	CAAATTCCAGGTCCG	0	-
chr1	36629446	36630086	CCACTCCTACCCCAG	0	+
chr1	36629466	36629997	CGTCGCTATCACGAC	0	-
chr1	36629499	36629979	ATTCATGACCAACTG	0	+
chr1	36629549	36630106	TGCTCACCTCCTTCA	0	+
chr1	36629555	36629988	CCTCAACTCTTAATC	0	-
chr1	36629561	36629914	CCCACTTCAAGATAC	0	+
chr1	36737512	36738042	CCCAATACACTCTGG	0	+
chr1	36737551	36737995	TATTCGTGTGAAGGC	0	-
chr1	36737561	36737987	GCTAATAACTAATCA	0	-
chr1	36737571	36738024	AACTCGGCAAACAGA	0	-
chr1	36737592	36738017	GAGCGATACTAGCAC	0	-
chr1	36737596	36738071	GTCCGTCACACTCGT	0	+
chr1	36737666	36738057	TCACCGTACCACGAT	0	+
chr1	36737682	36738206	CCCCAAACCGTCCCT	0	-
chr1	36737687	36738147	CTCTGCATTAATCTG	0	-
chr1	36737720	36738147	CGAAATTGAAAATTC	0	-
chr1	36737759	36738192	TCCCCGAACTCCGCA	0	-
chr1	36737798	36738156	CCCCCATCTTCACAC	0	+
chr1	36737872	36738342	TTCGGTATATTGACT	0	-
chr1	36737881	36738220	GTCCCCCACAAACCT	0	+
chr1	36737889	36738309	CCGAACGGCGGCAAT	0	-
chr1	36737893	36738275	TAACATCATCCTTAT	0	-
chr1	36737907	36738320	TCGGCCCTTCGCAGG	0	-
chr1	37558789	37559433	TCTTTACTAAAGTAC	0	+
chr1	37558814	37559362	ACCTTAACACCCTTA	0	-
chr1	37558889	37559407	CTAGCCCTAGTCTTT	0	+
chr1	37558905	37559462	TCGAAGCATGGTGTG	0	+
chr1	37558907	37559425	CTTCGTCTCCGCAGA	0	-
chr1	37558935	37559371	TGACGATTCGCCGGG	0	-
chr1	37558950	37559399	ACCAGCCAGTACGAA	0	+
chr1	37558978	37559358	CCCCGTGGCCCGGTA	0	+
chr1	37558981	37559507	AACGGAATCAGATCC	0	-
chr1	37559014	37559415	ACTTGATGTCGTACT	0	+
chr1	37559029	37559546	CACAGCTATTCTCTA	0	-
chr1	37559030	37559525	CGTGGTAGACAAGCA	0	+
chr1	37559036	37559522	CCCCTGTTCTCACGT	0	-
chr1	37559059	37559438	CACTGCTTCTGACAG	0	+
chr1	37559082	37559638	TCCACAGTGACGTAT	0	+
chr1	37559099	37559425	AGGAACTTACTCGGG	0	-
chr1	37559150	37559637	GACACCCACCTTCGG	0	-
chr1	37559196	37559636	GAAGGAAGCAAGTCA	0	+
chr1	37559261	37559616	ACGTAAAGCATGGGG	0	+
chr1	37559263	37559726	TCGGATCGTAGCAGC	0	+
chr1	37559279	37559727	ATTGGCACTTAGTCT	0	+
chr1	37559298	37559756	TCTAGAAGTCAAAGG	0	-
chr1	37559304	37559838	CTCGGACAGGAGTCT	0	+
chr1	37688994	37689586	TCCCGTTACCGTCGG	0	-
chr1	37689217	37689817	TCACGGCTAGTGACA	0	-
chr1	37689324	37689799	CCCCCCTCCCCACCC	0	-
chr1	37689354	37689785	TACCCGCAAAGTCT	0	-
chr1	37689365	37689828	CCCCACCTTACGTGG	0	-
chr1	37689399	37689778	GCCCCACGATCACAC	0	+
chr1	37689409	37689827	GACTATTACTGACGA	0	-
chr1	37689429	37689923	GTTGGCCACAGCACG	0	-
chr1	38378494	38378916	CGTCATTGAATTAAG	0	-
chr1	39490356	39491010	GCCATCAGAACCCAC	0	-
chr1	39490406	39491033	TCCATCAGATGGGTT	0	-
chr1	39490550	39490994	TACTACACAGTCGCC	0	-
chr1	39490559	39491126	AAAAGCATTTTATTA	0	-
chr1	39490571	39491096	AGTTAGCGTTTTAGG	0	-
chr1	39490575	39491052	CCCAGCGACGCAAAC	0	+
chr1	39490590	39490978	CGCCCTGTTACGCCC	0	+
chr1	39490601	39491121	CTAATAACATTTTCA	0	+
chr1	39490640	39491167	TAGTGCTGAATGAGA	0	+
chr1	39490653	39491150	CCCCCGCCAGTGATT	0	-
chr1	39490659	39491103	AATTTCGAACTCACT	0	-
chr1	39490660	39491115	AGTTCCGTCATCATT	0	+
chr1	39490671	39491083	CCCTCTCACGCAAAG	0	-
chr1	39490675	39491163	ACCCTTGTCTCACGG	0	-
chr1	39490680	39491113	AATCAGGCTGCAACG	0	+
chr1	39490692	39491139	GCGTATGGAACGCGC	0	+
chr1	39490695	39491211	CACTTCGGCAGAAAA	0	-
chr1	39490712	39491096	TAAATTAGGTACGCT	0	-
chr1	39490717	39491343	ATTTCGTTACCAGAC	0	-
chr1	39490722	39491150	GGAGAGCGTGGGGCG	0	-
chr1	39490729	39491227	GATTCCCCTCCACCC	0	-
chr1	39490751	39491149	GCCTGGTATGGCCCT	0	+
chr1	39490875	39491307	ACTCTATTCCAGGTG	0	-
chr1	39490889	39491435	TGCTTAATTGTCGGA	0	+
chr1	39490901	39491469	TAAGGCAAGTATCCG	0	-
chr1	39490910	39491327	ACCCATGGTGGCCCG	0	+
chr1	39490936	39491407	CGCGTTTACTCTTAG	0	+
chr1	40212641	40213149	AACCTGTTAGCCGCA	0	+
chr1	40212789	40213212	TACAGCATGCGTCGC	0	-
chr1	40212792	40213349	CACTATAATAACCCC	0	+
chr1	40212800	40213140	ACTGCATGGACTGTG	0	+
chr1	40212800	40213271	CTCAGTCAATCTCAC	0	+
chr1	40212936	40213430	CTCATAGAACCGAAT	0	-
chr1	40212944	40213430	TACACCCCCTCCAAT	0	-
chr1	40213040	40213469	TACGCCCCTGTCACA	0	+
chr1	40213079	40213500	AGACCAACAATACTT	0	-
chr1	40320413	40320932	AACTCCTTGTCCCTC	0	-
chr1	40320499	40320940	AGCCCCCGCATAGCC	0	+
chr1	40726645	40727213	ACATTGGTCTTGAAC	0	+
chr1	40726662	40727088	TCCCCGCAGCCAACT	0	-
chr1	40726678	40727159	CTACTAACGAGATCC	0	-
chr1	40726758	40727228	TTCAATGTAAGTAGT	0	-
chr1	40726807	40727273	CGAATCATGTTGTCA	0	-
chr1	40726868	40727444	CACTAGCATCCACAC	0	+
chr1	40726928	40727401	GCAAAAAGTGTAATA	0	+
chr1	40726959	40727351	AGATATATATTATTA	0	-
chr1	40726967	40727476	ACCCTAATACCAGAA	0	+
chr1	40861781	40862385	GTCGGGATGCACATG	0	-
chr1	40861870	40862289	GTTCTTAAACTTAAC	0	-
chr1	40861942	40862353	CCCTATTACTTATGA	0	-
chr1	40861978	40862364	ACAAGTCAAGCTTTC	0	+
chr1	40861978	40862490	ACCGTTCGCAGTCCC	0	+
chr1	40861982	40862419	TACCTGCTGCGTAGC	0	-
chr1	40862002	40862535	CATTGTTCTGCTTAT	0	-
chr1	40862006	40862396	ATAGAAGGCTCCTGG	0	-
chr1	40862012	40862440	GTCGCTTCTCCGACC	0	+
chr1	40862013	40862441	CCCCCTCCTCACCCA	0	+
chr1	40862022	40862469	ACCCGATATTACATA	0	+
chr1	40862023	40862495	CCCCCTGGCACTACC	0	-
chr1	40862029	40862503	TAGCTATTTAATGCG	0	+
chr1	40862061	40862658	GCCGCGTGAGTGAGG	0	-
chr1	40862064	40862553	GCAACACCCCGGAAG	0	-
chr1	40862066	40862586	GTGCCAGACGCGTGT	0	-
chr1	40862068	40862607	GCCTAACATAATAAC	0	-
chr1	40862071	40862601	TACCCGTTTTTTACG	0	+
chr1	40862075	40862451	TCCTTTGCTCGGAGT	0	+
chr1	40862077	40862504	ATCGCTTTAACGCAT	0	-
chr1	40862077	40862567	CCCACTAATTGAAGC	0	+
chr1	40862080	40862501	ACCAAGCCAGCCGCA	0	+
chr1	40862080	40862559	CTCACGAAAATCGAC	0	-
chr1	40862081	40862513	CTAAGAATTAAATAG	0	-
chr1	40862102	40862623	ACTCAGCCAAAGCGG	0	-
chr1	40862113	40862690	ACAAGTATAGTTTTA	0	-
chr1	40862137	40862558	CCGCCCGTTAACCTT	0	+
chr1	40862155	40862612	AATCGGTATAGACCG	0	-
chr1	40862157	40862565	GCAGCATCCTGATTT	0	-
chr1	40862181	40862535	AAGCGAGTGTCTCCT	0	+
chr1	40862199	40862645	GAGTCGGACCGCTGC	0	+
chr1	40862208	40862736	CCAGAATAACTGGGA	0	-
chr1	40862215	40862488	TAACGATACACCAAG	0	-
chr1	40862217	40862784	CATTGCCCTTAAAGC	0	-
chr1	40862244	40862751	CAAGAGATCAATCGT	0	+
chr1	40862246	40862775	CTTCCGCCACTTCAA	0	-
chr1	40862253	40862768	GACACAATAGGACCT	0	+
chr1	41615852	41616301	TCAGGTGGGCTGAAG	0	+
chr1	41615943	41616425	GCCTCCAATAAACAA	0	+
chr1	41615974	41616484	GTACTGCGGGTTCTT	0	-
chr1	41616062	41616557	TACCCCTCCCGGTTT	0	-
chr1	41616072	41616585	AATAGTCGCAAGGAA	0	+
chr1	41616092	41616559	AAACACGTCATTCCT	0	-
chr1	41616096	41616551	GGGTCATGGTACGTG	0	-
chr1	41616107	41616622	TGTAGAGAGGCGATA	0	-
chr1	41616132	41616601	ATCGAGCCCAGGCGAA	0	-
chr1	41616135	41616554	AACAACGTGGCCGGA	0	-
chr1	41616140	41616466	ACATCCATAACTTTA	0	-
chr1	41616160	41616593	TCTAGTCCAGCCATG	0	+
chr1	41616160	41616602	CCCACCAACAGTGCC	0	+
chr1	41616177	41616556	GTCAGCCTATTTAGC	0	+
chr1	41616197	41616564	CTTCAACGTTAGTGC	0	-
chr1	41616233	41616552	AGCTCTTACCGAGTC	0	-
chr1	43253859	43254414	ATCAATGTTCTGTTC	0	+
chr1	43304129	43304505	CCCGTAGCGGAAGGA	0	-
chr1	43304130	43304623	CCGCTCACTGCGGGC	0	-
chr1	43304164	43304678	TATACTTGACTACTG	0	-
chr1	43304269	43304600	TTCTTAGTTGTAATC	0	-
chr1	43304295	43304756	TCGTAGAGAGTCCTC	0	-
chr1	43304311	43304834	ACATTGCAGTACTTG	0	-
chr1	43304318	43304782	GGAGACATAGACCCA	0	-
chr1	43304333	43304696	CCCGGCCCTGCACCA	0	-
chr1	43304336	43304733	TCATAATCCGCCTCT	0	+
chr1	43304348	43304899	TGCCCAATCCGTGAC	0	-
chr1	43304367	43304836	TCATAGTACCAAGAA	0	-
chr1	43304387	43304798	CGTGCGGGCGGGCGC	0	-
chr1	43304387	43304855	TATATTTACTACCTA	0	+
chr1	43304387	43304871	ACCTTTAGAAGATAA	0	+
chr1	43304394	43304831	TGCTTAGGCAATAAA	0	-
chr1	43304401	43304778	CCCCCTAAACTGAGG	0	+
chr1	43304410	43304802	TCACCCAAACCGAAT	0	+
chr1	43304411	43304933	TACCCATGCGTTGCA	0	+
chr1	43304416	43304912	GAGTGACAGCGAATC	0	-
chr1	43304424	43304879	TGCGTGCAGGGTGTT	0	-
chr1	43304437	43304805	GTGTGCTACTCTTTG	0	-
chr1	43304501	43304922	TACACTCAGCCCACT	0	-
chr1	43304572	43305040	CATCGTTGACCAAAC	0	+
chr1	43314486	43315099	CGCATAAAGGCAAAC	0	+
chr1	43314593	43315141	TTCACGCAAGTCGAT	0	-
chr1	43314609	43315149	GGACAGCTGTTCTTG	0	-
chr1	43314611	43315250	ACCGCTGATTAAAGG	0	+
chr1	43314618	43315152	TAATCGCTATCTGGC	0	-
chr1	43314633	43315155	CTTTCTATAAGCACC	0	+
chr1	43314635	43315066	TCTGCGAGTGGCAAG	0	-
chr1	43314647	43315065	CCCGAAAACCCGCGC	0	+
chr1	43314664	43315245	GCACTTTCTATCTAG	0	-
chr1	43314672	43315164	AGACGCCATTGTTTA	0	-
chr1	43314693	43315135	GACCTACCATCTACA	0	-
chr1	43314700	43315163	ACATGCTAATCGCGT	0	-
chr1	43314703	43315066	CGCGATGCATACATG	0	+
chr1	43314703	43315156	AATGTGCTGTGCGGA	0	-
chr1	43314731	43315239	TGGGCTTAATTTATT	0	-
chr1	43314733	43315224	AAATTCGAGCTTAAT	0	+
chr1	43314739	43315335	TGATCAGAGTATCAT	0	-
chr1	43314766	43315186	ATTTGTTCCGCCATA	0	-
chr1	43314767	43315088	CGCAAGTAGCGCATC	0	+
chr1	43314767	43315097	GCAATCTCATGGCGT	0	+
chr1	43314780	43315284	TGTGCGGAATGTCCG	0	-
chr1	43314796	43315290	TCCCACGCAGGACAA	0	+
chr1	43314799	43315279	CCTACCAGAGTAGTT	0	+
chr1	43314802	43315315	CGCTGACACGCGTTA	0	+
chr1	43314809	43315385	GGCATATTGTTATGC	0	-
chr1	43314813	43315453	TCCACACTTATGAAT	0	-
chr1	43314822	43315230	TTACCACACATAACC	0	-
chr1	43314827	43315341	TATGAAGTGAAGCT	0	-
chr1	43314849	43315291	CCCTGGGGGGAGACG	0	+
chr1	43314855	43315299	CCCGGTACTTAACGT	0	+
chr1	43314864	43315286	TAAGAAGACATTTCT	0	-
chr1	43314865	43315329	CGACATATAGTAGCT	0	+
chr1	43314875	43315308	ACTGGGCTGAAGTGC	0	-
chr1	43314878	43315250	CACCGACATTTGACA	0	+
chr1	43314882	43315292	CTCGCCCTCGCCCCA	0	-
chr1	43314894	43315299	ACGCGCAATAGCCTC	0	+
chr1	43314910	43315330	ATGTTCATTAGCGGG	0	-
chr1	43314917	43315373	AGGGACCGGACTCCA	0	+
chr1	43314927	43315323	GTAACCTTATCATAA	0	-
chr1	43314942	43315411	CCGCTTAGTGCGCAA	0	-
chr1	43314942	43315428	CTATATACCGTCCAT	0	-
chr1	43314945	43315514	ACCTCCCTTTTGACC	0	-
chr1	43314965	43315411	ACCGCACTATGCACG	0	-
chr1	43314995	43315448	CTCAGCCCCCCACAC	0	+
chr1	43315003	43315333	CCCTACAATGAGCTT	0	-
chr1	43315006	43315530	TAATGCCCGTGATAC	0	+
chr1	43315021	43315665	CCTTCACCGTGACGT	0	-
chr1	43315023	43315532	TTAATAACATATCAAG	0	+
chr1	43315028	43315423	ACTTATGCTGCCAGG	0	-
chr1	43315036	43315531	CTGGTGTGCAAGTGT	0	+
chr1	43315038	43315480	GGGGTAGGGCTGCGG	0	+
chr1	43315047	43315454	TAAGCCCAAGTCAA	0	+
chr1	43315050	43315492	TCTCTCGCTGAGCAG	0	+
chr1	43316435	43316878	TCGAATCAGAGACAA	0	-
chr1	48590027	48590464	GGGGGGTGTGGGGAT	0	-
chr1	48590178	48590709	GGCCCCTTTCCTTAC	0	-
chr1	48590194	48590745	CCCCCCCGACTACCC	0	+
chr1	48590227	48590732	GCCTACAATCTCGAG	0	+
chr1	48790097	48790711	AAATAATGCTAAGCG	0	+
chr1	48790106	48790666	AGCCCACCTGACTAA	0	+
chr1	48790155	48790692	ACATAACCTGTCCCC	0	+
chr1	48790168	48790808	CAACGATTCTAATTG	0	-
chr1	48790224	48790705	AAGGCTCGAGGTTGG	0	+
chr1	48790254	48790837	CCTGAGGCCAAGCTT	0	+
chr1	48790350	48790749	TATTGGGTGCTGGAA	0	+
chr1	48790355	48790822	CCCCCGTAGCGTTAC	0	+
chr1	48790356	48790776	GGGTTTATCATCCTG	0	+
chr1	48790368	48790805	ACCCCTCAAAACGAC	0	+
chr1	48790370	48790933	ACGAAACGACGAGGT	0	+
chr1	48790393	48790636	GGGGAGGCCGGGGGA	0	-
chr1	48790403	48790836	CTCCCCAGCATACCC	0	+
chr1	48790418	48790925	AAGCATACTAGAGCA	0	+
chr1	48790426	48790883	TCGCAGGATCCGCCC	0	-
chr1	48790427	48790896	ACCTCATTTCGAATG	0	-
chr1	48790440	48790854	TCAAACACATACATA	0	-
chr1	48790451	48790769	AAACGCCCCTAACAG	0	-
chr1	48790471	48790872	AGCTCCACGGTTTAT	0	-
chr1	48790494	48790804	ACCCACAGGTTTTAA	0	-
chr1	48790520	48791063	GGCAGTGCTTGGACG	0	-
chr1	48790530	48790957	AGTCCGCGCAGCGTT	0	-
chr1	48790588	48790912	ACTCAGCCAGGACTT	0	+
chr1	48790588	48790940	CGGTCGGTGAGCCTA	0	+
chr1	48790599	48791045	ACTCCTCCGCGCCCT	0	+
chr1	48790632	48791052	TAAGGCATATACATA	0	-
chr1	50739503	50740089	ACACCTGAACAGCTC	0	+
chr1	50739592	50739973	GGCTTTTAGACTAT	0	-
chr1	50739650	50740101	CTTGATTGCATTTGG	0	-
chr1	50739675	50740075	AACAACTCTCCCATC	0	+
chr1	50739732	50740239	ACACCCCCATGTCGT	0	-
chr1	50739763	50740096	CGACCCTTTTCGTCC	0	-
chr1	50739764	50740314	CCACCCCTACCCCTA	0	-
chr1	50739766	50740207	CACACTTACTCCCAA	0	-
chr1	51299848	51300392	CACATCTGATCTAAC	0	+
chr1	51299912	51300370	CGCCAAACCAGGTGT	0	+
chr1	51299917	51300494	GCGAGTATGACGGAT	0	-
chr1	51299919	51300346	ACCATCCGAACATAA	0	+
chr1	51299945	51300454	TAGTTTCGTAATGAA	0	-
chr1	51299960	51300417	TTATACCATTAAGGG	0	-
chr1	51299980	51300346	CCTGTCACCAGTTAT	0	+
chr1	51299980	51300423	CTTAGCGCGATGACT	0	+
chr1	51299999	51300468	ACATTACGACCTATC	0	+
chr1	51300024	51300364	TCGCGCCCTTTAGAG	0	-
chr1	51300032	51300417	CCCTAGGTGGCTCTT	0	-
chr1	51300077	51300495	TCAAGAGACCATATA	0	-
chr1	51300088	51300429	GCCACTCTCCCATCC	0	-
chr1	51300094	51300500	AATAAGAAACCTTTA	0	-
chr1	51300151	51300578	ACGCCTGCTGGAGCC	0	-
chr1	51300172	51300562	TAATTTGTGTTAAGG	0	+
chr1	51300176	51300578	AACTTGTCGATCATC	0	-
chr1	51300188	51300767	GGCGTGAGCGAGCTG	0	-
chr1	51300203	51300693	AGCCTCAACGAAGAG	0	-
chr1	51300234	51300599	GGATAATGTGAACCG	0	+
chr1	51300234	51300606	AGCCCCGAGTACGCC	0	+
chr1	51300339	51300811	CTGCTCATCTATCTC	0	+
chr1	51300346	51300786	GTCTCTGACATGTGC	0	+
chr1	51939777	51940276	CCTGGCAAGCCCGAT	0	-
chr1	51939804	51940248	ACGCGGTGGAAGGAT	0	-
chr1	51939816	51940442	ACGTGGGGCTAATCC	0	+
chr1	51939824	51940345	CCTCTCCCATGCAAC	0	+
chr1	51939837	51940347	GAAACCCCCTGGCAC	0	-
chr1	51939838	51940410	CTGTTCGAGATACTC	0	+
chr1	51939846	51940516	TGGACAGTCTGTCAT	0	+
chr1	51939861	51940398	AATTGCATGGCGCCA	0	+
chr1	51939903	51940419	GCGCTACTAAGTGCG	0	+
chr1	51939904	51940440	CTCACGCACAGACTT	0	-
chr1	51939910	51940299	ACCATATGGCTCGGC	0	-
chr1	51939913	51940428	AACCCCAGTGACTTG	0	-
chr1	51939921	51940338	GTAGTTCGAGGTGCA	0	+
chr1	51939930	51940319	AGCATACGTTTCAAT	0	-
chr1	51939930	51940422	CACCCAGTTTACCAA	0	-
chr1	51939933	51940332	GGTCGAGGCAACTGG	0	+
chr1	51939933	51940389	ATGAACGAAGGCGCT	0	+
chr1	51939935	51940477	GTGTATATCAGTTTT	0	-
chr1	51939953	51940413	AAATTTAGATACATC	0	-
chr1	51939978	51940392	TAATGGCACCGACAC	0	+
chr1	51939980	51940388	ACCACTTCCCGCTCC	0	+
chr1	51939984	51940392	AAGAATAACAAACTC	0	+
chr1	51939994	51940592	GACCAATAAAACCAC	0	+
chr1	51940001	51940581	TTCGCTGCTTTCTTC	0	+
chr1	51940015	51940391	CGCCCCTGAAAACCC	0	-
chr1	51940020	51940452	AAGGGTACACGTCTG	0	+
chr1	51940021	51940347	TACGTTGTATTGAGG	0	-
chr1	51940034	51940534	CCCCCCACCGCACGG	0	-
chr1	51940036	51940458	GCTCGGGTCTACCCC	0	+
chr1	51940038	51940392	AAACGACAGAAATAG	0	+
chr1	51940038	51940415	TCCATTAGTATCTAT	0	+
chr1	51940057	51940558	CACGCAACCGCGAGC	0	-
chr1	51940062	51940501	TCTAACCCAATCATA	0	+
chr1	51940079	51940549	TCGTAAACCTAATCG	0	+
chr1	51940081	51940470	TCTCTTCTTAGATCA	0	-
chr1	51940088	51940305	TTACTGTTCGGAGAA	0	+
chr1	51940088	51940444	GCCGTCTTTCACAAT	0	+
chr1	51940088	51940530	ACAAGATACACCGTA	0	+
chr1	51940097	51940495	GTAACGGGTCCACAA	0	-
chr1	51940098	51940600	TACAAGACGGCTAAA	0	+
chr1	51940104	51940591	ACGCAGCGCCAATAC	0	+
chr1	51940104	51940677	CTCGTCTGCCCTCTT	0	-
chr1	51940113	51940625	ACTTCGTTCTTAGAA	0	-
chr1	51940115	51940606	ATACTGTCGCCGCTA	0	+
chr1	51940117	51940531	GGCGGAACGGGCGGA	0	+
chr1	51940125	51940617	TACCCATCTACTAAG	0	-
chr1	51940134	51940667	CCGGCAATAGCACAC	0	-
chr1	51940143	51940582	TGCCCCAATTTCCGA	0	+
chr1	51940148	51940635	TAGCATACCAGCATA	0	-
chr1	51940165	51940614	CCATTCGAATCCTTT	0	+
chr1	51940174	51940645	TATGTCTTAATTATT	0	-
chr1	51940178	51940566	CCCAACACGGGAAGC	0	-
chr1	51940197	51940659	AACAATTAGTAACTT	0	+
chr1	51940201	51940587	CCGCCCCTCAGCCAC	0	+
chr1	51940201	51940777	CTGAACATATTACTG	0	+
chr1	51940203	51940638	GCCTTTTACAAACAG	0	-
chr1	51940216	51940709	GTCCGCCCCCGTGCC	0	+
chr1	51940217	51940765	CCCGTTGAAATGGGG	0	-
chr1	51940250	51940683	ACCCAAAGTACAGTG	0	-
chr1	52478921	52479342	TCATAGATCACTTCA	0	+
chr1	52479065	52479548	AACATCCATTCCCCA	0	+
chr1	52479156	52479613	ACATTGCGTTTAATT	0	+
chr1	52480392	52480935	CCCCTCGCTGAACAG	0	-
chr1	52480424	52480966	CACCTTAATAGAACC	0	+
chr1	52480543	52481055	CACACGTTCTCACCA	0	-
chr1	52480564	52480995	GCCCCCTAACGTTAT	0	-
chr1	52480578	52481200	GCCCCCCCCCGTGTT	0	+
chr1	52480644	52481083	TTCAACATTCATAAC	0	+
chr1	52480687	52481055	GCTGTGACCGACATA	0	+
chr1	52480704	52481124	AAGTGGTGCAAACCA	0	-
chr1	52480833	52481294	TTCGTATGCACAAAA	0	-
chr1	52577927	52578339	ACCCACTCAACGCGT	0	+
chr1	53834956	53835422	ACTCAAATATTACAC	0	-
chr1	53835084	53835636	GTCCTTCACATTCCG	0	+
chr1	53835094	53835463	TAACGGTAGCGGTAG	0	-
chr1	53835105	53835659	AGGAGGGAGACAAAT	0	-
chr1	53835115	53835592	ACCTCGACTAGAATG	0	-
chr1	53835124	53835601	CACGTATTGCAGGAA	0	+
chr1	53835134	53835577	CCCACGCCGGCCATT	0	-
chr1	53835183	53835730	TTTCACTAAACCGCT	0	+
chr1	53835194	53835619	CCGGGCAATGGAGGC	0	-
chr1	53835220	53835613	TTCAGGACAGCAAAA	0	-
chr1	53835232	53835577	CCTCATTCGTAACTG	0	-
chr1	53835254	53835665	GCATGTAAGTCTTCT	0	-
chr1	53835265	53835669	CGGTCCTTCCAACCA	0	+
chr1	53835269	53835831	ACTATGGGATATTGA	0	+
chr1	53835278	53835612	AAATCCTGCCTGGTG	0	-
chr1	53835279	53835730	CCCTACCCTGAAACA	0	+
chr1	53835322	53835765	CGCCGGGTACGGCGT	0	+
chr1	53835343	53835960	CTACACCTTCGCTGA	0	-
chr1	53835347	53835780	TTAAATTTAGCCGAA	0	-
chr1	53835371	53835797	TGTAAACATCACCTA	0	-
chr1	53835376	53835870	CTCAGGGCTAAGAGA	0	+
chr1	53835389	53835708	TAAGGGGAAAACATA	0	+
chr1	53835396	53835769	ACCGAGTCCTAGAGA	0	+
chr1	53835403	53835919	GTCGTAACGGCAGCG	0	-
chr1	53835408	53835870	TGCTGATTAGGTGCG	0	-
chr1	53835437	53835854	GCCCTAGTCTAAAGC	0	-
chr1	53835466	53835948	GCGCAACATGCGTCA	0	+
chr1	58200887	58201353	TTTTCTCTAACATTA	0	+
chr1	58200938	58201596	CACGACCCGCCGCCT	0	+
chr1	58200939	58201343	GGCCTCAATTAACAC	0	-
chr1	58200948	58201386	TGCAAGGGGCTATAA	0	-
chr1	58200951	58201427	TCCACTCGGGAGGGA	0	-
chr1	58200972	58201454	TGCCCTCACACCTAC	0	-
chr1	58200988	58201669	GCATTTGACCTAGGA	0	-
chr1	58200997	58201418	ACGTGTGAAGATATG	0	+
chr1	58201016	58201558	GGGCGGTGGCCGAAT	0	+
chr1	58201016	58201570	CGCTATCTGTAGACC	0	+
chr1	58201022	58201331	AGTTTCTTTAAATCA	0	+
chr1	58201056	58201457	AACAACCATTCCATC	0	-
chr1	58201062	58201550	AGCTTTATACATTTG	0	-
chr1	58201067	58201472	CAACAGCCATTTGCG	0	+
chr1	58201071	58201572	GCCCGACCCCTCGCC	0	-
chr1	58201082	58201572	GCCGATTCCTTACTC	0	-
chr1	58201087	58201623	CCACTGATGGATTAC	0	-
chr1	58201108	58201624	TAGTGATACAATAAT	0	+
chr1	58201159	58201605	TATAAGATTCGATAA	0	+
chr1	58201173	58201594	CAAAGAGCTATTGGT	0	+
chr1	58201192	58201689	GCGCATTGGTTGATA	0	+
chr1	58201193	58201658	CATTCCTCACATATC	0	+
chr1	58201223	58201722	GAGCCCCATCCACCC	0	-
chr1	58201250	58201795	CTTCTAGGTCTGCTA	0	-
chr1	58201280	58201833	AGCCGGGGCGCCATG	0	-
chr1	58201439	58201903	GCTTGCCGCTTACTT	0	-
chr1	58796155	58796799	CCCACGCCACCCTCA	0	+
chr1	58796207	58796786	CATAATACGCATTCC	0	-
chr1	58796220	58796713	CTGCATGACCACTAG	0	-
chr1	58796239	58796741	CTCGAGTTACAAACC	0	-
chr1	58796255	58796736	CATGTAGGATATGGG	0	+
chr1	58796255	58796807	ACCGTGACGTTGCTT	0	-
chr1	58796256	58796790	CCAAACGGATGCGGT	0	+
chr1	58796290	58796745	GATGGTGCTTTCAGG	0	+
chr1	58796336	58796937	GCCCATACACTTTCC	0	+
chr1	58796337	58796710	ACCTCAATACACGGA	0	+
chr1	58796337	58796727	CTAAAAAGCTTCCAG	0	+
chr1	58796337	58796829	ACCCCACGGACACAT	0	+
chr1	58796347	58796793	CCCGGAGCAGCCGGT	0	+
chr1	58796347	58796878	AGCACCGGGCACCGA	0	+
chr1	58796357	58796809	ATCTTGCCTGCACAC	0	-
chr1	58796359	58796786	GGCTAAATTTTTCAT	0	-
chr1	58796364	58796842	CCCCCCCCACTTTTA	0	+
chr1	58796371	58796890	CCCCCCTCGAGTCAC	0	-
chr1	58796382	58796816	CCAGCCCAAAATTAA	0	-
chr1	58796405	58796892	TGCTATAGCTACGGA	0	+
chr1	58796415	58796861	GGCTACCACAATGCA	0	-
chr1	58796425	58796822	GCCTACCACAACGCC	0	-
chr1	58796432	58796997	TACCCCCCCAAATCA	0	+
chr1	58796440	58796871	CCCCGAGCTATTTGT	0	-
chr1	58796453	58796829	GTCCTCCCCCTGCTG	0	+
chr1	58796458	58796959	ATATGTTTAATCACG	0	+
chr1	58796480	58796802	TAGCCTCAACCCCAC	0	+
chr1	58796513	58796912	GATCGTACAAGTAGT	0	+
chr1	58796551	58797006	TTACGATCTGGAGTG	0	-
chr1	58796581	58797043	GCGGAAAGTGAACCG	0	+
chr1	58796587	58797116	AAGAATTAAATTTAA	0	+
chr1	58796590	58796942	TACCCGTACACTCCC	0	-
chr1	58796616	58797149	GGGGGCTCATATTCA	0	+
chr1	58796629	58797132	ACCCACCCTATACTG	0	-
chr1	58796634	58797090	CCCCTCAATTCAAGC	0	-
chr1	58796647	58797248	CCTCTATCCAGGTCC	0	+
chr1	58796663	58797023	AGCAAGGAAACGCTT	0	-
chr1	58796687	58797175	AGAACGTATGGCGCG	0	-
chr1	59174062	59174543	CCTAACAAATAAAAT	0	+
chr1	59174134	59174571	CTAAGGGCCTGGGAG	0	-
chr1	59174198	59174602	CGCAAATGGGTTGTT	0	+
chr1	59174368	59174755	TCAGATAGAAGCGAC	0	+
chr1	59174406	59174800	CGGTATGCCGTACCG	0	+
chr1	59174434	59174836	CAATAGATACTCAAC	0	-
chr1	59219871	59220287	GGGCGGATGGGAAGT	0	+
chr1	59219911	59220287	GGGAGGATGGGAAGT	0	+
chr1	59219911	59220344	CTCTACATTAATACC	0	+
chr1	59220014	59220471	CTTACCAGACTGTTA	0	+
chr1	59220087	59220595	TCCAGCCGACTGCCC	0	-
chr1	59220094	59220555	GGACTCCGGAGTCCA	0	+
chr1	59220156	59220690	GGGTGGACCTGCTAT	0	-
chr1	59272153	59272710	GCCGTTGCACAATTT	0	-
chr1	59272252	59272639	TCATCGCTGGAAACA	0	-
chr1	59272253	59272676	ACACCCTTACAACCT	0	-
chr1	59272260	59272699	AGGCAGGGTCACCTA	0	+
chr1	59272261	59272797	TCAGCAATTACGAAT	0	+
chr1	59272273	59272693	ATGACCCCAAGGTGT	0	-
chr1	59272306	59272759	GCCCACCCACCCCAG	0	+
chr1	59272419	59272825	GGCGGGCTTTCAGGC	0	+
chr1	59369354	59369824	CACAAGATAAAAAAT	0	+
chr1	59369488	59369906	ACCCTCAGGACTATA	0	-
chr1	59369506	59370047	CCGGTGGTTCTATGA	0	+
chr1	59369531	59369915	TTATTGCTTGGCCAG	0	-
chr1	59379000	59379653	AATCGCAGCCCGTAC	0	+
chr1	59433590	59434080	GCCGACTCCCAACCG	0	-
chr1	59433612	59434034	CTTAGATTTTCACGC	0	-
chr1	59433646	59434066	TGACCCCCCCGAGCC	0	+
chr1	59623575	59624032	AGTTACCAAGACGAC	0	+
chr1	59623617	59624005	TTCCGCATGGGACCA	0	+
chr1	59623691	59624143	CGCTAAGGAGAACGT	0	+
chr1	59623738	59624245	AGCTACCGCAACACC	0	+
chr1	59623755	59624266	CGATTATGTTGATAA	0	-
chr1	59623907	59624514	CATTGCCCTCTTGGG	0	-
chr1	60716226	60716685	CTACCCTTAAGGGCC	0	-
chr1	60716279	60716844	GATCGACCCCACACC	0	-
chr1	60716300	60716644	ACGCCTTCGACACCA	0	-
chr1	60716387	60716868	CTGTACCCGCATTCG	0	+
chr1	60716401	60716900	GGACACATGTTATAT	0	+
chr1	60716409	60716832	AGTGTTCTTATATCA	0	-
chr1	60716414	60716855	TACTATGCACAGAGA	0	+
chr1	60716459	60716958	CCGTTCAGGCACCTG	0	+
chr1	60716463	60716980	GCTGACTACACTCCT	0	-
chr1	60716470	60717048	CCCACGCCACCCCTT	0	+
chr1	60716480	60716855	ATCGTTATTTCCGCC	0	+
chr1	60716506	60716926	GCGATAACTCGGGGC	0	+
chr1	60716597	60717143	CACCTCACCCTCCCC	0	-
chr1	60919699	60920179	ACACCAGACCAACCA	0	-
chr1	60919873	60920196	GCCTGTGCGGACATG	0	+
chr1	62770129	62770701	GCCTCTACAACAAGG	0	-
chr1	62770283	62770710	CCAAGTTGAGCAGCC	0	-
chr1	62770385	62770782	GACTACAGGACGGCG	0	-
chr1	62770476	62770943	CACGCGAGCCTGCAC	0	-
chr1	62770680	62771013	CCTTAAGAAAGTAAA	0	-
chr1	64388039	64388503	GACGTCTTTCCCCCG	0	+
chr1	64388048	64388673	GCCAAAAACCTAATC	0	-
chr1	64388077	64388515	TCCATTACCCCAATT	0	-
chr1	64388086	64388498	TTTCGGGTGTCGTAA	0	+
chr1	64388109	64388563	TACGACCCACACCTA	0	+
chr1	64388112	64388584	CCCTACGGAGGGAGG	0	-
chr1	64388146	64388650	ATCTTGCTGGCTAAA	0	+
chr1	64388200	64388690	TAGCCCTAACAAACG	0	-
chr1	64388203	64388737	ACCTCGGGATACCCA	0	-
chr1	64388257	64388687	CCCACGTATCAACAT	0	+
chr1	65595417	65595826	TTTAGCACGGTTAAG	0	-
chr1	66385989	66386474	GTACCGATAGTTGGG	0	-
chr1	66386034	66386512	ATCTTATCAAACACA	0	+
chr1	66386084	66386573	ATCCCCCTTTCCCCG	0	+
chr1	66386128	66386583	CGGGCGGCGGGTCCG	0	+
chr1	66386131	66386574	CCCAGGGGGTTGTTA	0	+
chr1	66386164	66386704	CCCCTCCTATATCTC	0	-
chr1	66386173	66386566	AGCCCAATTTCGCTC	0	-
chr1	66386193	66386621	AGAGCAGACCCTTGT	0	+
chr1	66386236	66386661	CCCTACGAAGAGTCG	0	-
chr1	66386293	66386706	TTAAGTCTGTTTGTA	0	-
chr1	66386309	66386699	GTACTTTAAAGTAAG	0	-
chr1	66410709	66411299	TGTGACACACCAGCT	0	-
chr1	66410763	66411342	CACTGGCGCTTAGAA	0	-
chr1	66410784	66411336	CGCACTCCCTACCAT	0	-
chr1	66410809	66411297	CAGCGCCCCAGGTGG	0	-
chr1	66410817	66411299	CCAGAAATCCATACC	0	-
chr1	66410836	66411308	CACCAGAAATGGTAT	0	-
chr1	66410917	66411418	GCACGAAAATTCACC	0	-
chr1	66410941	66411344	CAGCTACGATCGGTG	0	-
chr1	66410970	66411453	AGGTCAAATCCGACA	0	-
chr1	66410979	66411527	CATTCTTATCTTTCC	0	-
chr1	66411010	66411418	CGACCATTGACCGAG	0	-
chr1	66411018	66411618	TTCATCCTGCCACGT	0	+
chr1	66411027	66411524	GATTAAACAAATCAT	0	-
chr1	66411096	66411523	GGCCGTGTCCCCAGC	0	-
chr1	67124115	67124664	ACCTGTAACTAATTG	0	-
chr1	67124276	67124801	TATACTCCGTTTTGT	0	+
chr1	67169073	67169575	GCCCCCCCTGTAGAC	0	-
chr1	67169197	67169680	CCGGTTCGTGCTAAC	0	-
chr1	67169238	67169721	GACAAAAGCGTTTCA	0	-
chr1	67169277	67169624	CCCCCCCCCTGCGCC	0	-
chr1	72182381	72182858	ATCTCCATGATGTTC	0	-
chr1	72182497	72182964	TGACAGGGTGGTCGT	0	+
chr1	72182516	72182937	TACTACCAAGTACCC	0	+
chr1	72182525	72183003	ATACAACGTTCATAT	0	-
chr1	72182546	72183008	TCTTCTTACACGCAG	0	+
chr1	72182559	72182931	GTCAGGCCTCAACCT	0	-
chr1	72182567	72183103	ACAATGTGTAACCCT	0	+
chr1	72182571	72182971	ACAGATCAATACACC	0	-
chr1	72182609	72183105	TAAACAGGTGCTGGG	0	+
chr1	72182611	72182989	AACGAAAGACCCGCC	0	+
chr1	72182627	72183210	AACTTCGCTATACCC	0	+
chr1	72182628	72183183	TATCTGACCTAGCCG	0	-
chr1	72182640	72183058	CGCGTACCGGAAGAG	0	-
chr1	72182644	72183209	CCCAATATTTGCCAT	0	+
chr1	72182650	72183057	TTCTCCAGCGCGCAG	0	-
chr1	72182658	72183151	CCTATACTAGCCAGG	0	+
chr1	72182674	72183191	ACCCACAAGAGTGAG	0	-
chr1	72182695	72183128	GATCATGCCGTCCCA	0	-
chr1	72182700	72183193	GCCACAGTAGCGGTT	0	-
chr1	72182715	72183192	CAACGACACTGGTGA	0	-
chr1	72182719	72183116	CTGATAGCTATTACA	0	-
chr1	72182722	72183178	ATTTCGTCTCGAGTT	0	+
chr1	72182732	72183194	AGCCCTTAGCAAAAA	0	-
chr1	72182748	72183246	CTAAGATCCCTTTTT	0	+
chr1	72182751	72183209	CGCCATAGACCTCCT	0	+
chr1	72182775	72183162	GGCTGCATCACCTTA	0	+
chr1	72182780	72183183	AAAGGCCTGAATCGC	0	-
chr1	72182790	72183298	CAGCCACAAGACAGG	0	-
chr1	72182818	72183255	CAATCTCTTCTATTA	0	-
chr1	72182855	72183202	CGCACGTGAGAATCA	0	+
chr1	72182856	72183197	CAAAACAATCACAGC	0	-
chr1	72446956	72447340	AACTTGCTATTTTCG	0	+
chr1	72446990	72447550	TACGTCGTGTACAAC	0	-
chr1	72447004	72447409	TGTGGTATCACAAAA	0	-
chr1	72447023	72447494	TATTATCGCATATT	0	-
chr1	72447034	72447704	TGAGTGCGGCCCATC	0	+
chr1	72447091	72447570	AGAAGGGCACCCGGT	0	+
chr1	72447095	72447572	CCATCAGCGGGTCTT	0	+
chr1	72447111	72447518	TCCGCTCTACAAGAG	0	-
chr1	72447111	72447622	ACTCAACTACTAATT	0	+
chr1	72447125	72447494	ACTGCTGCGCCCGAC	0	-
chr1	72447133	72447726	ACGCCCTCACCCCTT	0	-
chr1	72447142	72447682	GAAGGGTGGCTGAGT	0	-
chr1	72447158	72447611	ACGAAAATTCCGGAG	0	-
chr1	72447161	72447621	TTGGGGGGGCGGGGG	0	+
chr1	72447173	72447631	AATAGACTACAAGCA	0	-
chr1	72447174	72447627	AAAGCTCAGATAGAC	0	+
chr1	72447177	72447673	TCCCACCAGTCTGCG	0	-
chr1	72447198	72447665	CCCGCCGAAAAATGG	0	-
chr1	72447206	72447584	AGGAAGGCTCAGATT	0	+
chr1	72447206	72447654	ACCTCCCACCGACTA	0	+
chr1	72447211	72447721	TCAAGCTCCCCGAAA	0	+
chr1	72447216	72447836	CTCTCAGACGTCCAC	0	-
chr1	72447224	72447649	CGGCGCTTGTTTCCA	0	+
chr1	72447228	72447584	AGGAAGGTTCAGATT	0	+
chr1	72447228	72447624	AATCTAATGACGCTT	0	+
chr1	72447230	72447652	CTACTCCGAATCAGC	0	+
chr1	72447239	72447620	ATATGTGAGGTGTGA	0	-
chr1	72447263	72447735	CAACCAAGACCATAA	0	-
chr1	72447286	72447685	ACAGACGCTCCCACA	0	-
chr1	72447341	72447785	CATTCTAGTATTAC	0	+
chr1	72447349	72447993	CAAGTACCCGTCCAA	0	+
chr1	72447351	72447791	ACCATTTCCCTATGT	0	-
chr1	72447397	72447857	GACGCTCTTTATGAT	0	-
chr1	72838059	72838656	CCTACGCGACGTGTA	0	+
chr1	72838163	72838598	CCCTTCCCTCTCGAC	0	-
chr1	72838318	72838722	GTGACTGACAGGTAT	0	-
chr1	72838360	72838833	ATCACATTTAAATTG	0	+
chr1	72838391	72838869	ACTAGTGGACTTGAA	0	+
chr1	72855618	72856067	CCCGAACCGCTTTAC	0	-
chr1	72855735	72856285	CTCTTGCTACCCTCA	0	-
chr1	72855854	72856240	AAGCTCTGGTTTCGG	0	-
chr1	72855886	72856406	TGAAGTAGGGGTGGG	0	+
chr1	72855953	72856543	CCCCAGTGTATGGTC	0	+
chr1	73012781	73013096	TCCTGTGGCGACTTG	0	+
chr1	73012908	73013343	TCAGGATACCCCTGG	0	+
chr1	73223454	73223824	GATCCCTATAGTGAC	0	+
chr1	73408846	73409236	CCGCTCATCCCTCCG	0	+
chr1	73409007	73409410	TGGGTAGACGGGAAC	0	-
chr1	73718812	73719212	GCTCCCAACGTACAG	0	+
chr1	74130830	74131261	CCTTATTCAGACTCT	0	+
chr1	74765774	74766187	ACCAACCAGCACTCA	0	-
chr1	74767945	74768401	CCCAGTGCGAATGAC	0	-
chr1	74767956	74768550	TATTCTCAATTGTCG	0	-
chr1	74768142	74768561	GCTGTGCAAGCAATT	0	-
chr1	74768176	74768565	TTCCTTTGTATGTAC	0	-
chr1	74768186	74768691	AAGAGGGTTTGATAC	0	+
chr1	74768210	74768570	TCCACTGGCGCTCCC	0	+
chr1	74768229	74768579	GCCTGCTGGCACCGG	0	-
chr1	74768251	74768805	GGGTAGGAGATAGAC	0	-
chr1	74768251	74768836	ACGACGACCAGCGTG	0	+
chr1	74768255	74768708	AAACTCCGGGTTCAC	0	+
chr1	74768272	74768757	ACAGACTCAATAATT	0	+
chr1	74768283	74768686	TACCTCATCGCTCAT	0	+
chr1	74768353	74768796	GTGCAATTTACGGGC	0	+
chr1	74768359	74768999	CTCGATGTAGCGACA	0	+
chr1	74768364	74768840	GGCGAGCTGAAAGCA	0	+
chr1	74768388	74768868	CGAACTTAACTTAGC	0	+
chr1	74768397	74768816	AATCGTTATCCGCCC	0	-
chr1	74768475	74769075	CCCACGCGCTACGAA	0	-
chr1	74768480	74768872	AGATCACTGATGTAT	0	+
chr1	74894998	74895560	TATTCTACTGAGAAA	0	+
chr1	74895403	74895934	TCAGGGAGTCTCGTA	0	-
chr1	75356557	75357191	CACCCACACAATGCG	0	-
chr1	75545724	75546209	GACGCTTTCCCGTCA	0	-
chr1	75545759	75546112	CGCCAGCACCAAGTT	0	+
chr1	75545931	75546269	GTATCACCAGCAGAA	0	-
chr1	75569058	75569561	ATTGCGAGATACAAG	0	+
chr1	75569085	75569625	CCCAAACCAAACGCG	0	-
chr1	75569136	75569646	CCACTTATCATATCG	0	-
chr1	75569162	75569677	CGGAGAGCGGACGTC	0	+
chr1	75569205	75569685	TCAAAATATAATACA	0	+
chr1	75569218	75569663	TGACACAACCGGCCA	0	+
chr1	75569218	75569866	CGGGCCTGCTCATAT	0	-
chr1	75569250	75569592	ACGCCGACTCTAGCC	0	-
chr1	75569261	75569715	CGCATTAACGATCGG	0	-
chr1	75569275	75569848	GCAATGAGGTAAGTC	0	-
chr1	75569287	75569633	CCCCCGCGCGCAGTG	0	-
chr1	75569434	75569848	GAATCCACGAAAGGG	0	-
chr1	75569495	75569931	TCAGAGAATTCGACC	0	+
chr1	75569497	75569755	CTCCCTCCTCTTTAA	0	-
chr1	75569500	75569958	CCTCAACTCTCATCC	0	-
chr1	76100547	76101035	CCGCGCCTTGAAACC	0	-
chr1	76100629	76101059	ATGAAGTGTCATCAC	0	+
chr1	76100639	76101029	ATGTCTGGCCCCAAA	0	+
chr1	76100639	76101102	GACGTCAAGCCCATA	0	-
chr1	76100640	76101072	GCAGAAGACAGGTTT	0	+
chr1	76100640	76101156	CCCCGAGCCCCTTCC	0	-
chr1	76100643	76101102	CGCACCGATAAGGGT	0	+
chr1	76100643	76101173	TCAACACTTAAACAG	0	+
chr1	76100652	76101116	TCCGCCGGACGAACA	0	-
chr1	76100659	76101120	GCCTCACAGCGCGTT	0	-
chr1	76100661	76101107	CCTACCGCTCAGGTT	0	+
chr1	76100663	76101116	GCGTCCAGGTAGGTC	0	+
chr1	76100683	76101151	TCCACACTGCGCGGG	0	-
chr1	76100686	76101165	CAAGTCGCAAAAACT	0	+
chr1	76100695	76101103	CGGAACCCCCACGTC	0	+
chr1	76100701	76101213	ACACCGACCAACGAT	0	+
chr1	76100716	76101135	ATCAGAACCCAAACC	0	+
chr1	76100734	76101043	ATTATCGTATCGAAT	0	-
chr1	76100750	76101175	AACCTCATCATCCCT	0	+
chr1	76100753	76101298	AGATTAAGCGATCCT	0	+
chr1	76100755	76101173	ACCCGCTTCCATACG	0	+
chr1	76100755	76101227	CGGATAGATTTAAAG	0	-
chr1	76100765	76101206	CGCATATGGATGATA	0	-
chr1	76100792	76101132	AAAATTGATCATTAG	0	-
chr1	76100794	76101375	CGTTACCAGGGTGTT	0	-
chr1	76100801	76101230	CCCCTAGCGCGTCTA	0	-
chr1	76100801	76101254	TCGACACAACCCCCG	0	-
chr1	76100811	76101204	CCCATACACCCTCGC	0	+
chr1	76100841	76101311	TGCGGGAGGAATTGT	0	-
chr1	76100846	76101248	GACGCTGTGCCGGGT	0	-
chr1	76100863	76101267	CAGACCGAAAGCCAC	0	-
chr1	76100870	76101245	GAAAATTGAACAGAA	0	+
chr1	76100874	76101358	GATTCTGCGGGGCGG	0	-
chr1	76100909	76101334	AACACCCTAGTGCTG	0	-
chr1	76100910	76101258	CTGTTGGAACACCAA	0	+
chr1	76100912	76101341	CTCTGCCTTTCCGCA	0	-
chr1	76100984	76101379	TAACGTGAGTTTGGA	0	+
chr1	76114929	76115569	TCGAGTTAAATTTTA	0	-
chr1	76115011	76115589	GGGCGGGAGTGCGCC	0	-
chr1	76115108	76115638	TGCGGCTAGGACTAA	0	-
chr1	76115116	76115763	TTCACTCGATTCTCT	0	+
chr1	76115137	76115566	AGGTTATATCCGTGG	0	-
chr1	76115143	76115560	TAGGTTGGCCGATTC	0	+
chr1	76115155	76115592	GTTTTAACCAATGGC	0	-
chr1	76115164	76115599	GTCAAATCGGCAAAT	0	-
chr1	76115174	76115632	GAGACGCTCTAGACA	0	-
chr1	76115201	76115527	CTTATGTATCGCCTT	0	+
chr1	76115206	76115742	ATCAAGCACCTCACC	0	-
chr1	76115249	76115690	GGCGTTGGCAGGCTC	0	+
chr1	76115265	76115863	ACCGGACGCATCAGT	0	-
chr1	76115273	76115677	GACTCAGTCCGAAGC	0	-
chr1	76115278	76115685	TGATCCCAAACCCAC	0	-
chr1	76115294	76115820	CTGGCACGAAGTGCA	0	+
chr1	76115306	76115718	AGCCGGGCCAACACA	0	+
chr1	76115317	76115784	AATACTCATCAGACC	0	-
chr1	76115318	76115807	CACCTTGACACACCA	0	-
chr1	76115319	76115791	ACCGTTTCGGGTTCC	0	-
chr1	76115321	76115729	CTTCCTCCGCCTCGC	0	+
chr1	76115333	76115676	AAGCAAAACCAGCGC	0	-
chr1	76115334	76115783	TTCTGAAATAGGTAG	0	+
chr1	76115366	76115862	ACTCCCCACGGCGTA	0	-
chr1	76115382	76115803	GCAAATTGTTAATGAG	0	+
chr1	76115388	76115847	TTTCTGATATTCGAG	0	-
chr1	76115403	76115850	GCTCTACTGTTCCTA	0	-
chr1	76115403	76115872	AGGCTCCATACAAAA	0	-
chr1	76115424	76115994	CCCTGAATATCGAAC	0	-
chr1	76547223	76547717	AGATCGTCTGATTTG	0	+
chr1	76547317	76547823	CTTGCATTCCCCCAC	0	-
chr1	76547355	76547945	GATGGATCGAGGGCG	0	-
chr1	76547359	76547963	AAAACGACCGATCAT	0	+
chr1	76547364	76547874	ACCATGCCTCACACC	0	+
chr1	76547364	76547889	GATAGGTATATTCAT	0	+
chr1	76547372	76547885	ACCCCATCCATATCT	0	-
chr1	76547419	76547902	GACGACGCAGCATAT	0	+
chr1	76547456	76547885	CCACTACTCACATAT	0	-
chr1	76547502	76547954	AACACGGAGCTTCGT	0	+
chr1	76547505	76548049	TACCCATAACAATGG	0	+
chr1	76547512	76547937	TGGGGGGTGTCATTG	0	+
chr1	76547512	76547971	TGATATGCAAATTGA	0	+
chr1	76547529	76547907	GTCGGTTAGGCAGTT	0	-
chr1	76547581	76548077	TCGACTCTTGTAATC	0	+
chr1	76547587	76548054	ACCCATTGTACACAC	0	+
chr1	76547618	76548050	TCGTGAGAGGGTAAT	0	-
chr1	76734064	76734533	ACGAGTCCTATGCAT	0	+
chr1	76734128	76734673	CTTGTGCCTTTCTGC	0	+
chr1	76734149	76734577	TCACAACCACGGCTA	0	+
chr1	76734162	76734725	TCAGAAGTTCTTTTC	0	-
chr1	76734171	76734542	TCCACTCACTAAATG	0	+
chr1	76734182	76734609	CCCGACGCACCCAGA	0	-
chr1	76734195	76734667	ATCTTCGCTTTCTCA	0	-
chr1	76734205	76734642	TGCGCTCCCATAATT	0	-
chr1	76734206	76734630	TCGACGACGTTGACT	0	-
chr1	76734215	76734695	CACTAGATCGCGCGC	0	-
chr1	76734218	76734776	GAGGTATGAACGAAG	0	+
chr1	76734220	76734602	ACACGAACCTAAAGT	0	-
chr1	76734227	76734789	CTCGGGCCTTTGTTG	0	+
chr1	76734244	76734725	CTCTGCGTTTCCGAT	0	+
chr1	76734272	76734695	TATCAGATGACTGGT	0	+
chr1	76734276	76734758	CACGTTGCTCGTGCG	0	-
chr1	76734280	76734841	CCACGTAAGAGTATG	0	-
chr1	76734286	76734680	CCCGGCATCGGCCCA	0	+
chr1	76734297	76734811	TCCGTCGGCTGACTT	0	-
chr1	76734312	76734773	CCCCGAGCGGGCAGA	0	-
chr1	76734322	76734754	GGCATATTCTCGTTG	0	-
chr1	76734323	76734805	AGCTATCAGCGGAAC	0	-
chr1	76734326	76734705	ACAACGCCCTACCCC	0	+
chr1	76734336	76734852	ATTAACGGTCAACAC	0	-
chr1	76734410	76734744	CTCCTCCACACCCCT	0	+
chr1	76734414	76734927	TCATGCCTCCACCCC	0	+
chr1	77045195	77045774	CACGGTGCCTTCTAA	0	+
chr1	77045312	77045845	AGTACCTACTACCCC	0	-
chr1	77045372	77045891	GATGTGAGGGTGGCC	0	-
chr1	77045421	77045936	TTAACCCACGGACAC	0	-
chr1	77045472	77045981	CTATAATCGATGGAG	0	+
chr1	77045486	77045951	GACACCGATGAATTG	0	-
chr1	77045582	77046057	GGACAGGTATCATGA	0	-
chr1	77045680	77046281	ATCTGTTTCCAGCCC	0	+
chr1	77045724	77046122	TCAATGTTGACTGTC	0	-
chr1	77656774	77657318	GTAGCGCCAAGATTT	0	-
chr1	77656778	77657154	CCTACTGTCGCGGGC	0	-
chr1	77656800	77657375	GTTCTGGCGCATCGG	0	+
chr1	77656885	77657305	ACCAGTTAACACCTG	0	-
chr1	77656944	77657406	GGGAATTCACGCAAA	0	+
chr1	77656991	77657420	ACCTACCTACAACAC	0	-
chr1	77657006	77657415	TTCTCCATGGGCTTC	0	-
chr1	77657040	77657454	TAGTGCTTCACCGCA	0	+
chr1	77657079	77657578	TACCCAAACACCATT	0	-
chr1	77657148	77657609	CCAACCAGCCCCGTA	0	+
chr1	78563870	78564468	AACCCTGATAAACAA	0	+
chr1	78563954	78564398	TAAAAGACGCCCCAG	0	-
chr1	78564002	78564484	GTGCCAGGCGCTGGG	0	-
chr1	78564026	78564571	TCAGATGCGACTAAT	0	-
chr1	78564134	78564684	GAAACAGCCTAGCAT	0	+
chr1	78564235	78564673	CTCGTACGGTGCAAG	0	-
chr1	79462882	79463345	ACCGTGCATCCAGAT	0	+
chr1	79463035	79463555	ACCGTCAAACGTTAG	0	+
chr1	79463081	79463537	CTCGCCTCTCTATTA	0	+
chr1	79463151	79463560	ACCGTGAGCCAAATA	0	+
chr1	79463266	79463734	ACACTAATCCATCGA	0	-
chr1	79463280	79463672	CGCCAAGAACCAATC	0	-
chr1	80214678	80215113	GCCCTTTCACAATGG	0	-
chr1	80214830	80215210	AGTTTGCACGACTCG	0	+
chr1	80214838	80215215	CTACGAAAAGCGACA	0	-
chr1	80214868	80215318	GTGGGGCTGTGAAGC	0	-
chr1	80214971	80215595	CCTTTATGATACTAA	0	+
chr1	80400226	80400698	TGATTCCCGCTTCCG	0	-
chr1	80400292	80400720	GGCTCCACACGTTAG	0	+
chr1	80400309	80400725	GGGGGGGTTGAAGCG	0	+
chr1	80400322	80400721	CGAACGGTCAAGTGG	0	+
chr1	80400334	80400825	ATGGATCCACAAACA	0	+
chr1	80400403	80400910	ACAATTTATCTCGTT	0	-
chr1	80400417	80400919	GACACAGCCACTGAT	0	+
chr1	80400418	80400859	ACCATATCAAAAATA	0	+
chr1	80400431	80400937	AGCCTTGCAACAAAT	0	-
chr1	80400432	80400934	TATAACCATACCACT	0	-
chr1	80400434	80400845	ATCGCACGCATACGA	0	+
chr1	80400458	80400906	CGCGTCCAAGCACAC	0	-
chr1	80400467	80400822	CCACTCGCTCAAAAT	0	+
chr1	80400471	80400934	CGGTGCGTGCGATGA	0	+
chr1	80400475	80400871	CCCTATAACCCGATC	0	-
chr1	80400491	80400985	ACTAGCCATGAACAA	0	-
chr1	80400504	80400925	AATTACATATATTGC	0	-
chr1	80400509	80400905	AGGGTCATAGTGGAA	0	-
chr1	80400512	80400963	ACCGCCGGCCTTGCA	0	-
chr1	80400512	80401145	ACAGCCATACATGAG	0	-
chr1	80400513	80400914	AAAAACGCCATGGAC	0	-
chr1	80400534	80401113	GCCCCAACAGACCAG	0	-
chr1	80400544	80400956	TTAAAGTGTGTAAGA	0	+
chr1	80400548	80401072	CTCTGACCACAATGC	0	+
chr1	80400550	80401065	CCCCACGGAATAGTC	0	+
chr1	80400558	80401055	GACCTCGCAGTCTCG	0	-
chr1	80400567	80401234	TCAATGGGAGGGGTC	0	+
chr1	80400568	80400963	TCAAAGCCCGGACTC	0	+
chr1	80400570	80401105	TTACCCCCCATCGAC	0	-
chr1	80400577	80401019	GCTCTCCCCCCTACA	0	+
chr1	80400583	80400992	TCCAGCTAGGGGGGC	0	-
chr1	80400584	80400982	GCACTAAACGCCTCA	0	-
chr1	80400585	80401065	AGGCAGTGAAAGAAA	0	-
chr1	80400594	80401027	CGCCGCATGATCTCT	0	+
chr1	80400608	80400981	TGTCGAGTATTCAAC	0	-
chr1	80400616	80401096	CCGGCAGCCCCTCGA	0	-
chr1	80400634	80401186	ACCCATGAACGGCAC	0	+
chr1	80400647	80401037	GATATGTTGTCTAGT	0	-
chr1	80421138	80421685	CTACATGACTTGTGG	0	+
chr1	80421258	80421752	CACCTAGCCGAAGTT	0	-
chr1	80421355	80421803	ACAATGACACCCTGG	0	+
chr1	82165284	82165750	TTCCTCCGCTGTATA	0	-
chr1	82165293	82165775	ACCATGGAACCAAGC	0	+
chr1	82165295	82165811	GTCGTCGAAAAACCC	0	+
chr1	82165311	82165790	CCCCTACTTGGGCTC	0	-
chr1	82165316	82165862	AGCCGTTTGCGTACG	0	-
chr1	82165336	82165700	CGCCCATAAACTGAC	0	-
chr1	82165336	82165869	GCTAAGCACCCACCG	0	-
chr1	82165384	82165771	TCGTCTAAGAACCCG	0	-
chr1	82165384	82165963	GGCCCAAGGGACCGA	0	+
chr1	82165435	82166006	AGGTCGGGAGTAGAA	0	+
chr1	82165457	82165936	GCCAAGACCAGAAAC	0	+
chr1	82165493	82165963	ACCAGACCGCTGTAT	0	+
chr1	82165499	82165897	ATGAGGCGTGAGGGG	0	-
chr1	82165510	82165977	CGTGGGGGGGATATG	0	+
chr1	82165525	82165882	CTGTCCATTGTTGTC	0	+
chr1	82165538	82166071	AAATGTCGCATAGTT	0	-
chr1	82165541	82166074	CCCCCATACCATCCA	0	-
chr1	82165561	82165930	TAAAGGTGGGGGCAT	0	+
chr1	82165561	82166059	CTCAATTCGACTCTC	0	+
chr1	82165566	82165917	CTGTTCCCGAAAACG	0	-
chr1	82165568	82165989	GACCCCCAACAGCAA	0	+
chr1	82165593	82166148	CCCGATTCCTACCTC	0	+
chr1	82165635	82166050	TTCGCAATACGGCAT	0	-
chr1	82165643	82166217	CAGAGTGCAATGCGT	0	+
chr1	82165655	82166144	CGTTCACATGTGGGT	0	-
chr1	82165724	82166123	CCCGGTCAATTATCT	0	-
chr1	82165737	82166158	GGCGGAGTCCCCACG	0	-
chr1	82176778	82177156	GACGCACTAGCCCAC	0	+
chr1	82176816	82177289	TATGCAATTATGTAG	0	-
chr1	82176824	82177271	TACCAAAGTGCAGTC	0	-
chr1	82176859	82177423	GCAGCAGCACCGCGC	0	-
chr1	82176865	82177336	CGATGTCTAGGATCG	0	+
chr1	82176869	82177266	ACCCGCACACTCGAA	0	-
chr1	82176890	82177417	TTACCCGCTGTTTAA	0	-
chr1	82176910	82177334	TCGGTCAGTTAATAC	0	-
chr1	82176929	82177283	AACTGCCGATAGCCT	0	+
chr1	82176943	82177353	TAGATACGCGTAAGC	0	+
chr1	82176950	82177329	ATAATGCTCAAGACT	0	-
chr1	82176955	82177420	GCCCACCTGGGCCCA	0	-
chr1	82176960	82177425	AGCCCCTATGCACAC	0	-
chr1	82176967	82177433	AACCAACGTCCAAGT	0	+
chr1	82176975	82177379	TATCCTCGACACATA	0	+
chr1	82176981	82177365	CTAGCGTGATGTGGG	0	+
chr1	82176983	82177332	TACGACATGCTTGGA	0	-
chr1	82176999	82177402	CCCAGAGGTACCTAC	0	+
chr1	82177018	82177470	ATCCTAACATCGGCA	0	-
chr1	82177032	82177588	ACCTACGCAATTGAC	0	-
chr1	82177037	82177381	GACCCCTCACCTGAC	0	+
chr1	82177037	82177521	GCGTGAGTTGACGAT	0	-
chr1	82177038	82177478	ACCCTTTCAGCCCTA	0	+
chr1	82177052	82177450	CTACAAAGCCATACT	0	-
chr1	82177055	82177534	TCATGACTTTCACAG	0	-
chr1	82177061	82177474	TCATGCCCTGGTCAT	0	-
chr1	82177061	82177692	CGCCCATCGGATGTC	0	-
chr1	82177062	82177512	AGCACCAGCACCGCT	0	-
chr1	82177100	82177506	CGGACATCAATACCC	0	-
chr1	82177138	82177540	ACTTTTGCTGGAAAC	0	-
chr1	82177153	82177624	CAGATGCATTGAGGG	0	-
chr1	82177163	82177671	TTCAATATTATAGCG	0	+
chr1	82230982	82231480	CAGCGTTGGAAGTTC	0	-
chr1	82231017	82231583	TGATTTTGTTTTCGG	0	+
chr1	82231035	82231468	GACGTTTTATTACCA	0	-
chr1	82231075	82231657	TACTGCCCTTAGTGC	0	+
chr1	82231095	82231651	ACAATTAATCCCGCT	0	-
chr1	82231096	82231642	GTGTCGAGTGTCGGA	0	-
chr1	82231121	82231529	TTCTATTGGCCGGTA	0	+
chr1	82231209	82231725	CCCACCCCATTGGAA	0	+
chr1	82231248	82231656	GCCCACCCAGCGCCT	0	+
chr1	82231257	82231693	GACTTCTCATTTGAT	0	+
chr1	82231264	82231698	CGGGGGTGTCTGAAA	0	-
chr1	82231274	82231833	TTCCGAGGAACGTTT	0	-
chr1	82231281	82231683	TTCTCCTTACGTTTG	0	+
chr1	82231296	82231755	GGTAGTATCTAGGTT	0	-
chr1	82231298	82231896	CACCCTCAGTGTCTC	0	+
chr1	82231329	82231798	GGATCACTACTAATC	0	+
chr1	82231408	82231895	GGGGGCGGTGTGGGC	0	-
chr1	82231424	82231795	TCTCTAGGGAGAAAG	0	+
chr1	82231428	82231930	CCCCCGTCCGATACA	0	+
chr1	82742933	82743399	GTAGATGTACTACAC	0	+
chr1	82742996	82743378	CTTATTGGCGGCAAC	0	+
chr1	82743102	82743542	CCCAACTAGCCTAGG	0	+
chr1	83244615	83245088	CACATAACCTAAATT	0	-
chr1	83244675	83245152	GTGGCCGATAGACGC	0	-
chr1	83244699	83245227	GTATAAACAGCTCTA	0	+
chr1	83244748	83245156	CGTTGATTGTTGGAC	0	-
chr1	83244757	83245144	CATAAAAATTCCTAA	0	+
chr1	83244780	83245135	CATAAAAAATTATCC	0	+
chr1	83244780	83245250	ATCACTCAGTGGCGG	0	+
chr1	83244781	83245185	ACCGGAAACGCCATTG	0	-
chr1	83244783	83245232	AACGCCGCTTCATAG	0	-
chr1	83244795	83245326	AAGCGAACAACTTAA	0	+
chr1	83244807	83245154	TCCCTTGGTCCCGTC	0	+
chr1	83244820	83245354	CTCCCAAGGTCCTAT	0	-
chr1	83244832	83245303	GGTGAAAGTCAGCAG	0	-
chr1	83244837	83245222	TTCTCAGAAAAAAGG	0	+
chr1	83244837	83245250	ATCACTCAGTGGTGG	0	+
chr1	83244837	83245260	CCAAATGCCCAGCAT	0	+
chr1	83244847	83245412	CACCTCCCTAATGGC	0	-
chr1	83244856	83245484	ACTAACGCCGAGAGT	0	-
chr1	83244865	83245289	GCCCCGCGTCTCGCA	0	-
chr1	83244895	83245394	AATCGTTAGGAATTA	0	-
chr1	83244903	83245290	TTTGCTATCGAATTG	0	+
chr1	83244921	83245475	CCCACCAAAACGTGA	0	+
chr1	83244936	83245378	GGTTAATGTGACCGG	0	+
chr1	83244943	83245483	CACTAGGCTTGCAAG	0	-
chr1	83244975	83245489	TGGTGCCTCAGAGAT	0	-
chr1	83245005	83245482	TCCCTTTTGACGCTT	0	-
chr1	83245025	83245536	CCCATCCTGAGATCA	0	-
chr1	83245030	83245456	TCGTGGATGCTGAGA	0	+
chr1	83245041	83245549	TCTAATATGTCCCCA	0	+
chr1	83273452	83273962	CTGACTGGCCTGGAC	0	+
chr1	83273509	83274083	GACTTTACACGAAAC	0	-
chr1	83273511	83274079	CATATCCTCATACAG	0	+
chr1	83273521	83273905	ACCGATTAAGAAACA	0	+
chr1	83273537	83274009	GGAACTTACAGACCA	0	-
chr1	83273554	83273946	AAAAGGAACCACTGT	0	+
chr1	83273575	83274040	TCCGCGTCGGCGAAC	0	+
chr1	83273577	83274029	TCTATCCACCCTTAA	0	-
chr1	83273586	83273967	CCCCCTGGCCCAACG	0	+
chr1	83273622	83274160	CACATGAGCAGAAGA	0	+
chr1	83273638	83274074	CCAGGTTCCCTACAG	0	+
chr1	83273672	83274048	ACATAGCCCTCCCT	0	-
chr1	83273680	83274081	CAGAACACGGCGAGC	0	+
chr1	83273708	83274321	CGTGTAGCAAATTAG	0	-
chr1	83273736	83274130	CCGTATTAGCAGACA	0	+
chr1	83273742	83274181	CGAGGGGAGGCGCTA	0	-
chr1	83491317	83491806	GCAGGCTTCGGGTAT	0	-
chr1	83491359	83491772	ACGAGGCTTAACTAA	0	+
chr1	83491360	83491853	CGGTAAGGACGGAAG	0	-
chr1	83491381	83491861	GTAGGCTGTCAACCC	0	+
chr1	83491432	83491831	CTAATGGAAGGCCAA	0	+
chr1	83491451	83492003	CTGGTCATGGCCTAA	0	+
chr1	83491474	83491926	CTCCAACAATCTTAA	0	-
chr1	83491503	83492024	CGACTCGACCCACAA	0	-
chr1	83491508	83492110	CCCGTCAGTTACTTC	0	+
chr1	83491565	83492045	TGGTACTCACTTGTG	0	-
chr1	83491578	83492092	AAAACTATGTAAGGG	0	-
chr1	83491588	83491989	TATCTGGTTTGGGAA	0	+
chr1	83491609	83492042	TCTCACACGTAATTT	0	+
chr1	83491619	83491998	CCCGCCCGAGTAGAC	0	-
chr1	83491624	83492042	ACATAATGCAGTGAC	0	+
chr1	83491641	83492132	GATCGTACAATTACA	0	-
chr1	83491650	83492131	GACCTAAGGTTCTTT	0	+
chr1	83491652	83492077	GGAGGCGGTCTATGA	0	+
chr1	83491728	83492106	GCTATTACATATATC	0	-
chr1	83501867	83502305	GTTCCTTAAAGTCCA	0	-
chr1	83502092	83502493	CCGAATCACCCCGCC	0	-
chr1	84274469	84275063	TAAGCGGGACACCTG	0	-
chr1	84274635	84275191	CTCCCCTGAAGTATC	0	-
chr1	84274684	84275080	CTCATCCGACGGTGA	0	-
chr1	84274728	84275206	GCCGGACTTCCATAG	0	-
chr1	84274734	84275294	TCGTCTAGGAAACAA	0	-
chr1	84274739	84275144	CGCTGGCCAACTTAG	0	+
chr1	84274776	84275117	CGTATTGAAAGTCTC	0	-
chr1	84274799	84275162	CACATCCCATTTGGG	0	+
chr1	84274818	84275231	GTCCCGGTCAACAAA	0	-
chr1	84274826	84275382	CCCCACGTCCACCCT	0	+
chr1	84274834	84275347	GCCATGCGCAATCAA	0	+
chr1	84274967	84275581	CACCATCCACCCCTT	0	+
chr1	84275701	84276113	AATAGCAACTAATGC	0	-
chr1	84275823	84276252	TCGACAAGGGTTAAC	0	-
chr1	84446153	84446558	ATCGGCTACCGTATA	0	-
chr1	84446165	84446697	CTATGCATCCGATCT	0	+
chr1	84446177	84446624	AACAGATAACGGACC	0	-
chr1	84446213	84446692	CCCCCCGCAGAAAGC	0	-
chr1	84446325	84446813	GGCACGGTTATTTGC	0	-
chr1	84446465	84446923	CTGACGCTGTTAATC	0	+
chr1	84834641	84835021	ACCCAAGGGCCTCAT	0	-
chr1	88909078	88909424	CAGTACAAGATAAAA	0	+
chr1	88909225	88909677	AGTAACGGCATAGAA	0	+
chr1	89699630	89700160	CCCGACCGAATCAAC	0	+
chr1	89699790	89700296	ACCGCGACCGACGGC	0	-
chr1	89699829	89700273	CCGTTTTAATGTGAA	0	-
chr1	89699913	89700349	CCCCGGCGTCCCTAG	0	+
chr1	89699919	89700489	GGTTGCTAAAAGTA	0	-
chr1	89814377	89814981	GTCGGGGCAGCCGCT	0	-
chr1	89814378	89814975	GACCACAAGGAGGGA	0	-
chr1	89814443	89814966	CTGTAACACGCAGTT	0	-
chr1	89814487	89814942	GCTGGCACGATTCGG	0	-
chr1	89814498	89815034	GTAATCCATCAAATC	0	-
chr1	89814519	89814943	CTGTAGACGCAGGAC	0	+
chr1	89814594	89815137	CCCAACCCCTGGATC	0	-
chr1	89814603	89815089	GTGCTCCATCAGATA	0	-
chr1	89814623	89815092	GGGAGTGAAGTAACA	0	-
chr1	89814764	89815233	CTACCGCGTCGCCCC	0	+
chr1	90109403	90109880	CTCCCAATGTGCATC	0	+
chr1	90109412	90109902	AACGCTACGCTCCTC	0	+
chr1	90109446	90110041	GCCATATCGGGGAAA	0	-
chr1	90109473	90110003	AGCTCGTGTCCACAA	0	+
chr1	90109477	90109899	CCGCACAGCAATTAA	0	+
chr1	90109482	90110036	CTCTAACCTAGAGTC	0	+
chr1	90109484	90110058	TTGACAGGCGCGCTC	0	-
chr1	90109490	90109962	AAGCTATATAAACTT	0	+
chr1	90109494	90109991	CCCGAACTGACAGTC	0	-
chr1	90109500	90109897	CTCCCCGGCCCGAAG	0	-
chr1	90109505	90110006	ACCATCATCAATTCG	0	-
chr1	90109516	90110001	GTTAGCAGATAACGA	0	+
chr1	90109526	90109919	ATACATATCGCATAC	0	+
chr1	90109534	90110008	CCCTTCTAAACTACT	0	-
chr1	90109535	90109984	GCTGCTTGTTAGAGT	0	-
chr1	90109539	90110002	CCCCCCTTCTATGCA	0	-
chr1	90109539	90110014	ACCGCCCCCGTCGAA	0	-
chr1	90109539	90110054	CGCTTCATTTGAAAC	0	-
chr1	90109554	90110091	ACCACCGTAAGATAC	0	-
chr1	90109562	90110139	GAAAGTAGACCTGCC	0	+
chr1	90109564	90110020	GAAAATCTCTATGAC	0	+
chr1	90109567	90110137	TAACACGGTGATCTG	0	+
chr1	90109571	90110008	GCATGATACCGCTTC	0	+
chr1	90109576	90110065	CGGATTAATGAAAGC	0	-
chr1	90109586	90109980	CATACCTCTGCTTTC	0	-
chr1	90109592	90110162	AACGGGCCTTATTGC	0	-
chr1	90109601	90110065	GTACGCAGACAGTCC	0	+
chr1	90109601	90110068	TGAGTGCAACGGACG	0	+
chr1	90109616	90110055	CACAGCACACAGCTC	0	-
chr1	90109624	90110056	TCAACGTCGGTGTGC	0	+
chr1	90109629	90110160	ACGTACTTTACTCCC	0	-
chr1	90109630	90110007	AAAGACTGTAAAAAG	0	+
chr1	90109633	90110084	ATGATTCCGAGGCAG	0	+
chr1	90109640	90110000	TCGAAAACCATATGT	0	+
chr1	90109640	90110178	TACATCCAACTCGCT	0	-
chr1	90109651	90110048	ACAGCCATCGTAATT	0	-
chr1	90109658	90110155	AGTGTGGGTATACGA	0	+
chr1	90109659	90110096	TCCCCCGTCCTATGC	0	+
chr1	90109662	90110061	GCTTTTTCAAACACT	0	-
chr1	90109668	90110149	CCCGCCGCACTTACC	0	-
chr1	90109701	90110065	AGATTGACGCTCTAC	0	-
chr1	90109712	90110301	CTGACTGCGATAAAG	0	+
chr1	90109724	90110109	GTCTTGTGAGTATAT	0	+
chr1	90109728	90110309	GACAAAGATGTAACT	0	+
chr1	90109730	90110120	GGCCCAACCTAGGCA	0	-
chr1	90109730	90110216	TGCAGGCCGCGCTTT	0	-
chr1	90109758	90110231	GCTATGCCGCTAGTG	0	+
chr1	90109794	90110219	AGTTCTGCCCTTGAT	0	+
chr1	90109799	90110379	AAGGTGACAATAGCC	0	+
chr1	90109818	90110269	ACCATTAGCAGTCGC	0	-
chr1	90109833	90110341	GACGGGTGTGACAGA	0	-
chr1	90109844	90110269	TGGGGTGGGTGCGTG	0	-
chr1	90109889	90110330	AGCACCTTGTATATT	0	+
chr1	90149932	90150440	CCCGGGGGAACAAGT	0	+
chr1	90150027	90150491	ATCAACTGCCTACTG	0	+
chr1	90150055	90150415	GGGCTATGAGCACGA	0	+
chr1	90150055	90150522	ACAAAATATGGTCCA	0	+
chr1	90150104	90150539	TTGGAGGAAAGATTC	0	-
chr1	90150105	90150609	AAACCAGTCGGGTTC	0	+
chr1	90150105	90150624	GGGCTAATGATTGGA	0	+
chr1	90150130	90150693	TATTCACACCCCCTG	0	+
chr1	90150135	90150609	CTCACTAACCGTACG	0	-
chr1	90150166	90150663	GCGACATAGAGAAGC	0	+
chr1	90150181	90150675	CCGACATTCATACTA	0	-
chr1	90150188	90150658	TGTTTAGAGCAATGT	0	-
chr1	90150189	90150660	ATGCGGCTGGCTGAT	0	-
chr1	90150197	90150638	TTTCCACACGACCCT	0	+
chr1	90150282	90150720	GTCGGGTACGCCCAG	0	-
chr1	90150296	90150743	GGGGGGAGGGAGGCG	0	-
chr1	90164539	90164949	GGGGCACGCTGTAAA	0	-
chr1	90164644	90165114	CGGGAAGGGCAAGCA	0	+
chr1	90164758	90165200	TCTCATCACAAATAA	0	-
chr1	90175464	90175982	CGTGACCCTGAAGAA	0	-
chr1	90175478	90175926	AGGGGGTGTCATCCG	0	-
chr1	90175481	90175890	AACGAGCTGGTCAAA	0	+
chr1	90175514	90175941	AGCACCGACTCAGAT	0	-
chr1	90175516	90175978	GTATAAACGTAGTGG	0	+
chr1	90175520	90175997	ACATAATACTCTTTC	0	+
chr1	90175523	90175960	ATCGTAACCAGAGAG	0	-
chr1	90175528	90175872	GATTGTCGTCCGTTC	0	+
chr1	90175535	90175982	CGCTTGTCAAACTGT	0	-
chr1	90175559	90176036	ACCATCTAGCTCACA	0	-
chr1	90175590	90176102	TGGTAGTGAGTCGGG	0	-
chr1	90175611	90176095	GCCCTCGTCCCATCG	0	-
chr1	90175617	90176102	CTGGCTCCCACACCC	0	-
chr1	90175618	90176102	ACTGGTTGCTACCAA	0	-
chr1	90175660	90176103	AGACACTACTATCGT	0	+
chr1	90175677	90176078	AAGTTACCTATAGTT	0	+
chr1	90175696	90176110	CGAGGGTAGGGAGGG	0	+
chr1	90180615	90181221	ACCGTACCGGGCAAA	0	+
chr1	90180670	90181045	TGAAGCGTTGGCTTT	0	+
chr1	90180707	90181105	GATGAAGCACGGGTG	0	-
chr1	90180731	90181114	CCACGGCCACCCCTT	0	-
chr1	90180783	90181411	TAAGACATCAAAATA	0	-
chr1	90180873	90181386	GTGAACATCACTCTC	0	+
chr1	90180887	90181417	TCTCATATTACACGG	0	-
chr1	90180917	90181522	AAGCAACCAATCTCC	0	+
chr1	90180948	90181350	GCCCGATTGTCACAC	0	+
chr1	90181049	90181505	CTCCATTTATCGCCA	0	+
chr1	91392748	91393213	TGTTGACCATTCACC	0	+
chr1	91441500	91441954	TGCAGTGTCCTTATC	0	-
chr1	91441683	91442151	TACACTACGGTTAAA	0	+
chr1	91782066	91782554	GCAGAGTATGGTTAG	0	+
chr1	91782278	91782753	CAATTTGATCAGGCA	0	-
chr1	91782422	91782803	TACGTAAGAGATACT	0	-
chr1	92418557	92419058	CCCCCATTCCAGAAT	0	-
chr1	92418576	92419081	CCCAGTAATTAAGGC	0	-
chr1	92418659	92419094	CGTCGATGCTCCGAG	0	-
chr1	92418696	92419255	CCCTGCTTGAAACCC	0	+
chr1	92418701	92419089	CCACACCCATGAACA	0	+
chr1	92418723	92419271	TTGATAACCCGAAAG	0	-
chr1	92418741	92419187	CCGGACCGTCCCAGC	0	-
chr1	92418773	92419144	CTAACGCCTACCGGA	0	+
chr1	92418778	92419333	CAAGGGTCACCTTTC	0	-
chr1	92418791	92419297	CAGCCCTCGCATTTA	0	-
chr1	92418808	92419314	CTGGCCGCATACATG	0	-
chr1	92418811	92419287	CCCTCTCCCACCTCT	0	+
chr1	92418857	92419399	TCCCTCCCCCAACAC	0	-
chr1	92418882	92419364	ACAAGCGGAGCAGAC	0	-
chr1	92418893	92419274	ACGGGGTTTACGTTT	0	-
chr1	92418910	92419351	TGATAACCCCACCGG	0	-
chr1	92418912	92419381	GCCCGCCGGTCGTGG	0	-
chr1	92418930	92419381	GGAGTGGACACTGCC	0	-
chr1	92418989	92419401	TAAACAACTAGCCT	0	-
chr1	92553214	92553643	GCAAACACCTATGCG	0	+
chr1	92553545	92554086	TCCTCAAGACGATAG	0	+
chr1	92572331	92572969	GATACGCTCTCCACG	0	-
chr1	92572351	92572863	GGGATCGTATCGGGG	0	-
chr1	92572380	92572943	TCCAATAGGATTCAG	0	-
chr1	92572383	92572946	TTAACACCATCTTCT	0	+
chr1	92572419	92573011	CCCGCTACGATAAGT	0	+
chr1	92572514	92572994	TAAATGGGGACCGAC	0	-
chr1	92572536	92573074	ACCCAACACGTTAAA	0	-
chr1	92572549	92572943	CCCTCCCAGGGAGAA	0	+
chr1	92572549	92573003	CTACACTCCTCCCAA	0	-
chr1	92572549	92573051	CACACCTTCTACAGC	0	-
chr1	92572550	92572991	TACACAAAAATACGG	0	-
chr1	92572596	92573056	ACAACTTGCGAGTCG	0	+
chr1	92572599	92573036	ATTAAGTATGTAGTT	0	+
chr1	92572601	92573069	TCAACATCTCCTTAG	0	-
chr1	92572608	92572981	CCCTGCCCGCCGGGC	0	+
chr1	92572610	92573020	TACACATATGTAGAA	0	+
chr1	92572612	92573012	CACGGCTTGCCTGCC	0	+
chr1	92572636	92573111	ATCTAACCTGTCATC	0	+
chr1	92572657	92573047	CTAGGTATACTAGTG	0	+
chr1	92572658	92573096	TCCACACGCTCCGTT	0	-
chr1	92572665	92573063	GCCGCACCCGAACCC	0	+
chr1	92572665	92573124	AACTTTGATTTTTAA	0	+
chr1	92572678	92573160	CTCTAAACAAAAAAA	0	+
chr1	92572684	92573144	ACCACTTCATAAGAG	0	+
chr1	92572692	92573090	ACCCAGCTACAACGA	0	+
chr1	92572693	92573120	CACTCCCGCCTTGTT	0	+
chr1	92572696	92573143	CACCCCTAGCTGCCA	0	-
chr1	92572701	92572940	CATTCCCAACGACCA	0	-
chr1	92572702	92573063	GACGCATCCCTTTCA	0	+
chr1	92572716	92573065	AGATCCCTAGCTGCC	0	-
chr1	92572738	92573174	GGGGGGGTCGAGCAC	0	-
chr1	92572745	92573209	TTATGTATAGAAAGG	0	-
chr1	92572746	92573309	ATAAGCAGTTTTTAA	0	-
chr1	92572764	92573190	GGAAGGGCTTAGGAG	0	-
chr1	92572776	92573353	AACACTCTTACAATA	0	-
chr1	92572822	92573313	CCCGCTGCTTGTGTC	0	+
chr1	92572839	92573275	ACTTCCTACATACCT	0	+
chr1	92572848	92573280	AACCTCGGGGTGGCG	0	-
chr1	92572883	92573310	TCCCCATCTTACAAA	0	+
chr1	92572922	92573354	TCCCCACCTACCCTG	0	+
chr1	92735222	92735551	GTCACCAACAATATA	0	-
chr1	92735385	92735902	GCCTATTTTCTACAT	0	+
chr1	92740045	92740532	ACACTTATGAAGAGC	0	-
chr1	92740131	92740498	CCTCAACCCGGACAC	0	+
chr1	92740178	92740655	CTACCCTGGTAGTCT	0	-
chr1	92740178	92740670	TGGGGGGGGAGACCC	0	-
chr1	92740181	92740824	CTCAACCCTCACCAC	0	-
chr1	92740194	92740633	AAGTCTCTGTTCCCT	0	-
chr1	92740197	92740617	CGCCCACTACACTTA	0	-
chr1	92740212	92740670	TCCTCACTCTGACCT	0	+
chr1	92740214	92740700	AAAAAACTTAAAACC	0	-
chr1	92740241	92740764	ACCCGATCCGGAATG	0	+
chr1	92740243	92740609	CTAGGTCATGGCCTA	0	-
chr1	92740269	92740708	GTAAAGAGCGTTAGT	0	-
chr1	92740274	92740852	GCGGAACTAATCAAC	0	+
chr1	92740286	92740864	TCAGTAGTGCGAGGG	0	-
chr1	92740310	92740798	CAACGTGATAGCCGT	0	-
chr1	92740318	92740710	GTAGAGTGTAAGTCT	0	+
chr1	92740325	92740797	TAGCCATCTTAAATT	0	+
chr1	92740329	92740765	TCCCAGAACATACCA	0	+
chr1	92740357	92740856	GGTGTGACACCACCT	0	+
chr1	92740371	92740888	CAGACGGTTCTGCTT	0	+
chr1	92740374	92740721	AGTAGTGTACCGTGG	0	+
chr1	92740383	92740920	CATCAGAATTCATTA	0	-
chr1	92740387	92740822	TCCAATTTCCCATCT	0	+
chr1	92740395	92740892	GACGGAACCGCTATC	0	+
chr1	92740396	92740750	GAATGGTAGTCCAAA	0	-
chr1	92740408	92740783	AACTTCATCGGATCC	0	+
chr1	92740441	92740944	CAGCTACAACTAATA	0	-
chr1	92740442	92740857	CATACAACTTAGAGC	0	-
chr1	92740447	92740868	TCGTAGGACAGCTTT	0	-
chr1	92740460	92740988	CCTGCTCACGCGTCT	0	+
chr1	92740475	92740978	CCTTCGCCCGCTCCA	0	-
chr1	92740476	92740880	GCGTTATGCCAGCGG	0	-
chr1	92740489	92740985	GAACTGAGGGGCTGA	0	+
chr1	92740492	92740888	TCCGGTCCTACCCCG	0	-
chr1	92740494	92740943	ACCATTTAACATTTA	0	-
chr1	92740500	92740943	CTAGCGACCATCTTT	0	-
chr1	92740510	92741020	GCGATGCAGGTAGAG	0	+
chr1	92740531	92740997	CATTGATCCCCCGTC	0	+
chr1	92740564	92741051	GACTCTAGACGAAAA	0	+
chr1	92740583	92741093	GCAGGAGCAAGCACT	0	-
chr1	92740588	92740976	AGAGCCACCGCCTAC	0	-
chr1	92740623	92741023	ACTCAGATTAATTCC	0	+
chr1	92740628	92741104	TTTTAGTTTTTGCAT	0	-
chr1	94775709	94776191	GCACAACCCACGCCT	0	-
chr1	94775792	94776214	AGAGGTCAGGAGCAC	0	+
chr1	94775798	94776443	GCGGGTGGCTTTGTG	0	-
chr1	94775877	94776310	TACCGTCCCTACCTG	0	+
chr1	94775881	94776370	TGCGAGTCTCAGGGT	0	+
chr1	94775892	94776323	GGTCTTTTGTACGAA	0	+
chr1	94775917	94776416	TACGGTGTTCAAAGA	0	+
chr1	94775919	94776405	GTCCGGCAGTCACTC	0	+
chr1	94775965	94776469	TTTCTGCACTACTCT	0	-
chr1	94775981	94776446	CCCGACGGACCTACC	0	+
chr1	94775997	94776335	CATGCAACAATTGGC	0	+
chr1	94776012	94776542	AGGTGTGTGGTACCC	0	+
chr1	94776027	94776428	GGTTGGATTGTGGGA	0	+
chr1	94776047	94776505	CGACGTTTCTCGGGT	0	-
chr1	94925803	94926361	ACGACCCGTACATCC	0	-
chr1	94925815	94926396	AGTTGTCGGCGTGCG	0	-
chr1	94925837	94926258	CGCTAAGTCCCATGC	0	-
chr1	94925856	94926448	AAAATGCATCCGGTA	0	+
chr1	94925893	94926323	TACTACACGCTGCAG	0	-
chr1	94925898	94926403	AGAGGCCGCTGCTCA	0	+
chr1	94925909	94926336	CCGAATGGGCGCACC	0	+
chr1	94926009	94926454	AGCATAGACGGACCA	0	+
chr1	94926012	94926491	AAGAGTCACATGCAG	0	-
chr1	94926058	94926707	AAAAGTTGCCCTTGG	0	-
chr1	94926106	94926516	AACGGGCCCTTCCGG	0	+
chr1	94926133	94926592	CAGTACCGTACCCCA	0	-
chr1	94926139	94926602	TGGGATACCATGCGA	0	+
chr1	94926153	94926589	GCCAGAGATTTGAGG	0	+
chr1	94926165	94926534	AACGCCCACCACCCG	0	+
chr1	95020612	95021117	CTTCACCCACGGGCC	0	-
chr1	95020684	95021186	TTCACACGTGTATGA	0	+
chr1	95024459	95024991	CCCAAAAAATGTAGC	0	+
chr1	95024468	95025070	GACGCCCATTGGTCG	0	+
chr1	95024550	95025002	GACCCAGTGAGCACG	0	+
chr1	95024650	95025083	TCAAAGCTCCCCGCT	0	-
chr1	95024672	95025196	TCCGGTTCTCCGCCA	0	-
chr1	95024680	95025176	AGCAGCGAAACTACC	0	-
chr1	95024712	95025083	TGCAAAGTTCATCAC	0	-
chr1	95024714	95025177	GGACCTTATTATTGC	0	-
chr1	95024721	95025266	GCGTGTGGAAACATG	0	-
chr1	95024740	95025243	TGCAATTGCTAATGC	0	-
chr1	95024752	95025151	GTCTGCCCTCGATTA	0	-
chr1	95024769	95025233	CCATCTTACTCGGTG	0	-
chr1	95024780	95025264	ACCGAGTGTACAGAC	0	-
chr1	95024795	95025304	ACCGCCTGTCTCGGA	0	+
chr1	95024813	95025208	AAGACTCTCCCCCGA	0	+
chr1	95024843	95025340	CTTCGTCGCCCCGTC	0	+
chr1	95024902	95025319	AAAGAAACAGTGCCT	0	+
chr1	95024932	95025408	CGTTAAACTTTCAAC	0	+
chr1	99534423	99535033	CATAACAAAGTAAAG	0	-
chr1	99534472	99535006	GCAGCAGAATGATAC	0	+
chr1	99534523	99535013	CCAAACATATACATC	0	+
chr1	99534736	99535180	CTTCGATTCTGGGTT	0	+
chr1	99534745	99535148	ATAAATCAACAGCGA	0	+
chr1	99534811	99535232	ATACTCGACCAGGGA	0	-
chr1	99534838	99535199	GGTGGGCCTACCACA	0	+
chr1	99534841	99535308	ACCTCCTCCCTTCCC	0	-
chr1	99534884	99535385	GCGCCCCCCTCCACC	0	-
chr1	106898486	106899014	ATTATCCTTACACCG	0	-
chr1	106898584	106899127	AGACTCCCGCGCCCG	0	-
chr1	106898756	106899230	CCCACACACTTCAAC	0	-
chr1	106898838	106899235	GAGGATAACAACTAA	0	-
chr1	106898954	106899490	GCCGGGGCTACTTCG	0	-
chr1	106898965	106899355	GCATCCTCGCTGGTA	0	+
chr1	107009228	107009681	AGACCGGACCGGGCA	0	+
chr1	107009240	107009665	CCTGCGCATCTCGAG	0	-
chr1	107009250	107009666	ACCACAACTATAGCG	0	+
chr1	107009264	107009703	AGTTAAGCTGATCGA	0	+
chr1	107009322	107009818	GCCCACCATCCGCGA	0	+
chr1	107009395	107009738	TAAAGTGTCTGACCG	0	+
chr1	107009436	107009897	TAACGACTGGACAAC	0	+
chr1	107009487	107009958	CACAGTTTGGGGAGA	0	-
chr1	107360060	107360567	CGCGCTTCCTTTAGA	0	+
chr1	107360142	107360692	CAACTAACATGACGC	0	-
chr1	107360192	107360713	TCCCCAAAGAACTAC	0	+
chr1	107360199	107360575	CCGGCCCCACTTACC	0	-
chr1	107360222	107360751	TGGCGACATCTCGAG	0	-
chr1	107360228	107360845	TACCGTTTAACCTAG	0	+
chr1	107360277	107360801	TTGACCATCGTCGGA	0	+
chr1	107360281	107360751	GCCCCAAGGTGTTAA	0	-
chr1	107360301	107360782	ACGCCACTGCGACCT	0	+
chr1	107360329	107360705	CCGGACCGCGATGCA	0	+
chr1	107360361	107360735	TTCAGACTATTGGAA	0	-
chr1	107360413	107360882	AACCTAAACCATGAG	0	-
chr1	107360433	107360819	AGCATATTATCTCCC	0	-
chr1	107360437	107360861	ACTCCCACTCAACCC	0	-
chr1	107360446	107360767	ACAGAGGCAGGGTAT	0	+
chr1	107360458	107360783	CTCCCCTGCCCCTAG	0	+
chr1	107360505	107360932	GATAGAAACGTTGGA	0	-
chr1	107360514	107360955	GAGTGAGTTTCGGGC	0	-
chr1	107360564	107360927	AAGTACGACAACCTC	0	+
chr1	107360576	107360979	TTACAGATCATATG	0	-
chr1	107360642	107361181	AAAAGTAAAGATCTA	0	+
chr1	107360652	107361043	GAAGTTATACCAAAT	0	-
chr1	107360664	107361156	ATATTTATGCTTCGA	0	-
chr1	107360688	107361039	TGCGAAGTCGCCCCA	0	-
chr1	107360694	107361154	GAGCCACACCAAAGT	0	+
chr1	107360700	107361238	CTTAAAAAACAACAA	0	+
chr1	107360713	107361197	AATTCTACAGCAATG	0	-
chr1	107360722	107361071	TAACATGCAAAGCGT	0	-
chr1	107360747	107361198	CACCCCCAAAAAATC	0	+
chr1	107360772	107361174	ACTCACTACAACGAT	0	-
chr1	107360801	107361247	ACCTATGCACAGCAC	0	+
chr1	107360816	107361259	ATCCCCAGGTATCTC	0	-
chr1	107360850	107361221	ACTTACCGCTGTGTG	0	+
chr1	107360884	107361312	TCTAGGGTTTGATAT	0	+
chr1	107804847	107805382	AATCAGGTGTAAGGG	0	-
chr1	107804885	107805358	CCAAAGCGACATCGA	0	-
chr1	107804892	107805336	CCGGAAGAAGATGCC	0	+
chr1	107804936	107805363	CAACCTCAGGGAACA	0	+
chr1	107804953	107805379	GACCTCTAACAAACA	0	-
chr1	107805010	107805533	ACACTGCCTTTTTAC	0	+
chr1	107805012	107805454	CGCCGTTGCCTCCAT	0	+
chr1	107805013	107805454	ACACGTTTTCCTAAC	0	+
chr1	107805018	107805432	GTTATATACCTGGGC	0	+
chr1	107805090	107805499	CCACTCCTGACTTTC	0	+
chr1	107805109	107805527	CTAACAATCTAGCAG	0	-
chr1	107805150	107805622	AAACACGCCGATATT	0	+
chr1	107805156	107805587	TGTGGTGTTACCGAC	0	-
chr1	107805300	107805640	AAAACGGGCTGTGGA	0	+
chr1	108479531	108480040	ATTTTCTGTTTCCGA	0	+
chr1	108479699	108480206	CGTCGAATACATAAG	0	-
chr1	108479730	108480129	GGGTACAACCACTCA	0	+
chr1	108479778	108480215	ACACACGCGGCAACT	0	-
chr1	108479835	108480345	ACACTAAACCTGTTT	0	+
chr1	108479839	108480275	ACCTTCGCACCACCT	0	+
chr1	108479845	108480241	GGCAATGTATTCTTT	0	+
chr1	108479873	108480365	TCCCTCTCGCCATAC	0	+
chr1	108479900	108480360	GCATTGTAGAATAAA	0	+
chr1	108479973	108480660	AACTGCCCACTAAGC	0	-
chr1	108641401	108641895	GTCACTGTCGACCCA	0	-
chr1	108641449	108641936	TAACCTTAAATCTGT	0	+
chr1	108641457	108641947	TGGTTATCCGGTAAA	0	-
chr1	108641490	108641986	ACTAAACTCAGGGCC	0	+
chr1	108641494	108641870	CGGACACGTACGTCA	0	-
chr1	108641496	108641934	ACCACCGGGCGATTT	0	-
chr1	108641510	108641971	CGGTGGCTTTTTTGG	0	+
chr1	108641519	108641958	CGACGGGCTCTTTAC	0	+
chr1	108641544	108641961	CAAGCCTGCACCCTA	0	-
chr1	108641554	108642074	CAAAGCTTCTACCGA	0	-
chr1	108641584	108642229	ACAGCATGACCCGGC	0	+
chr1	108641627	108642106	CACGCAACGTCGTGA	0	-
chr1	108641656	108642063	CAGAAGACAAGTACC	0	-
chr1	108641678	108642105	CCGAGTGACCATACC	0	-
chr1	108641691	108642157	TTACACCAATCGCTC	0	+
chr1	108641700	108642100	CGCGGGCGCACATAA	0	-
chr1	108641707	108642027	GTCACTATCGCGTAC	0	-
chr1	108641722	108642260	TCTATGTAATGCTAC	0	+
chr1	108641760	108642355	AGCTCGAGCCCCCTT	0	-
chr1	108641762	108642246	CCTGCCCCCCAACCC	0	+
chr1	108641770	108642259	TCTGTTCACGCATCC	0	-
chr1	111845163	111845543	ACCCATCGAACCGTA	0	+
chr1	111845168	111845589	CTAATTGACTCTAGA	0	-
chr1	111845179	111845650	ACCTCCCCCACTCAA	0	-
chr1	111845192	111845517	TCGTGCCCATCGGAG	0	+
chr1	116678448	116678893	TTTGGTTTATTGTAG	0	+
chr1	116678497	116678926	CGGCCCTGACGCCAA	0	-
chr1	120255184	120255832	CGTACCACGGTGACC	0	-
chr1	120255409	120255881	GGCTCTCGCCACGTA	0	-
chr1	120255427	120255948	CCCCGCACCAGGGGT	0	-
chr1	120255431	120255920	AAGCCTTGCAACGTT	0	-
chr1	120255568	120256016	GCGATCACCATCGTT	0	-
chr1	120255664	120256244	ACACGTTATCCCATC	0	+
chr1	120255709	120256125	TCATGCACGATTACT	0	+
chr1	120255720	120256153	GCCCGCGAAAAATTT	0	-
chr1	120255766	120256274	GAACAAAACCGCACC	0	-
chr1	120255866	120256275	GAACTCCCTAGAACT	0	-
chr1	122150090	122150594	CCCCCGTGTCCGATG	0	-
chr1	122150289	122150790	CCAGGTCGGATGGTC	0	-
chr1	122150411	122150854	ACCTTCCTGACACAA	0	+
chr1	122150429	122151033	AACCCCCCTATCCGA	0	-
chr1	122150440	122150851	TCGAGACCTCCCGCA	0	+
chr1	122150486	122150987	ACAACCCGCGTGGGC	0	+
chr1	122150488	122150994	TAACGGCGGAGCGTG	0	+
chr1	122150497	122150920	CCATTACCAAAAAGA	0	-
chr1	123232219	123232727	CATGGTGACGTTTGT	0	+
chr1	123232334	123232979	TCTTCGCTACCAAAC	0	+
chr1	123232541	123233067	TTTGAAAGGGTCCCA	0	-
chr1	123232545	123233081	CGAACGCCTTTTCTG	0	+
chr1	126996963	126997502	CTCAATAGAATTAGC	0	-
chr1	126997063	126997430	CACCTCCAGCCTACT	0	+
chr1	126997131	126997675	GATCCAATTGGTCCA	0	+
chr1	129437853	129438485	CACCCCCATTCTCAC	0	+
chr1	129437972	129438505	GCATCGACACATTAG	0	+
chr1	129437983	129438479	GTCGGTCTTCTGAAC	0	-
chr1	129438014	129438433	TAACGTTTTGCGCTA	0	+
chr1	129438044	129438486	CCCGACAGACAAGCG	0	+
chr1	129438062	129438629	ATCACCACGGCCCTG	0	-
chr1	129438087	129438636	TGGTCATATGAATGT	0	+
chr1	129438143	129438559	AACGGACAACATTTA	0	+
chr1	129438176	129438764	AGTGAAGATATTGGG	0	-
chr1	129438226	129438758	TGATCCGCGCCCCCA	0	+
chr1	129438250	129438720	GCCCGGCAGATGTTG	0	-
chr1	129438293	129438740	TCGTATTAGCTCCTT	0	+
chr1	130722791	130723385	CCCCTTTCCCTATCA	0	-
chr1	130722844	130723248	ATACGAGCCTAGTGT	0	-
chr1	130722869	130723287	CACCCCGCTGAGCCC	0	-
chr1	130722893	130723273	GCCTTACCCGTACCC	0	+
chr1	130722894	130723401	ACCTCACTCTTCTTC	0	+
chr1	130722924	130723304	GTCACTCTCAATAAC	0	-
chr1	130722926	130723300	CTTAACGTAAGATGC	0	-
chr1	130722938	130723467	CAGTTAGTACGACTG	0	-
chr1	130722949	130723380	ATACCGAGTGGTCCT	0	+
chr1	130722951	130723430	CAGGTCTACAGTCCC	0	-
chr1	130722973	130723346	CCGTGACTCCTAGAT	0	+
chr1	130722978	130723473	GGCTGATACCTTAGC	0	+
chr1	130722982	130723421	TATAAGCTAAGTAAA	0	+
chr1	130722995	130723475	ACGAGCCGCGTTCGG	0	+
chr1	130723012	130723395	CCCGCTTTACTCGCC	0	+
chr1	130723032	130723531	TGACGGCCCCATATA	0	-
chr1	130723033	130723438	TAGAATCAACCTTCG	0	-
chr1	130723086	130723484	CCACTATTCCTGCCG	0	+
chr1	130723100	130723526	ATTTATTGGAATTAT	0	+
chr1	130723202	130723631	ATTAAGCAAACTAAC	0	+
chr1	130953581	130954098	TATCTCATACGACCA	0	+
chr1	130953600	130954098	CTTCTGACGAACCTC	0	+
chr1	130953638	130954167	GGCGGGGGGGGGTGC	0	-
chr1	130953691	130954171	CCAACTGGTGCGAAG	0	+
chr1	130953697	130954298	CATCTGACGCGCAGT	0	-
chr1	130953731	130954156	TCTTGCCGCCCCCCG	0	-
chr1	130953803	130954311	GATTATAATTAGCGA	0	-
chr1	130953993	130954346	CTCAGGCTGTACATA	0	-
chr1	132574740	132575376	ATGCATCTCTCTATC	0	+
chr1	132574797	132575303	GCCCGCCCTTGAATT	0	+
chr1	132574851	132575337	GAACCCGCGCTTCTT	0	-
chr1	132574885	132575381	TCTATGCCTAAAAAG	0	+
chr1	132574895	132575478	GCTGACGCCGACTGC	0	-
chr1	132574905	132575285	CTAGACACCGAGAAT	0	-
chr1	132574932	132575352	AGAATCCATAACATC	0	+
chr1	132574954	132575478	CGTGTGGAGAAGGAG	0	-
chr1	132574966	132575411	TGCTTACACAAGGGA	0	-
chr1	132574967	132575505	TTACTCCGCTCTCGG	0	+
chr1	132574980	132575435	ATATTCCTACGCTCG	0	-
chr1	132574981	132575445	TAAATAGTCATTCAC	0	+
chr1	132575027	132575487	ACGCCCACTGCCATC	0	+
chr1	132575029	132575617	AGTGCCCCTGACCGA	0	-
chr1	132575031	132575390	CAGGGTTATATGTGC	0	-
chr1	132575037	132575481	AAAGCGCACGGGGGT	0	+
chr1	132575052	132575472	CGCCTCTGCAGGAAA	0	+
chr1	132575060	132575451	GTCTTCCATTTCTTT	0	-
chr1	132575084	132575530	TGATGAGTGCGATAA	0	+
chr1	132575091	132575757	ATATGCAAACCAAAC	0	-
chr1	132575108	132575501	CGCGCTCCCCACTGG	0	-
chr1	132575119	132575528	CGCATCACGCAAGGG	0	-
chr1	132575133	132575661	CCCCTATGCCTTACC	0	+
chr1	132575197	132575722	AGCAATGATTACGGG	0	+
chr1	132575202	132575597	CCCCGCCACTCCTCA	0	+
chr1	132575242	132575605	ACCTACTAGCATCAG	0	+
chr1	132575242	132575636	ACATATAACATGCCC	0	+
chr1	132575248	132575604	TCCGCCCAGTCAACC	0	-
chr1	132575273	132575708	AACTAGAGTTCGTCT	0	-
chr1	132575283	132575725	GGGTCGCCTTTCAAT	0	+
chr1	132575291	132575776	GGAGATTTTTCTTTA	0	-
chr1	132598353	132598996	CCCATCACTTCTACA	0	-
chr1	132598501	132598975	ACCCATCAGAAACAA	0	+
chr1	132598540	132598908	ATTCTAAATCGTAAA	0	+
chr1	132598614	132599081	AAACCGAAGCCCGTG	0	-
chr1	133022392	133022897	TCCACTTACCAAATT	0	-
chr1	133022400	133022974	CGCCTAAGACGAGTA	0	-
chr1	133022483	133023038	GGAAATAAGGGAAGA	0	+
chr1	133022507	133023016	ACAACCCTGTTTGCT	0	+
chr1	133022607	133022907	CCCTTCCGCCGAGGT	0	-
chr1	133022622	133023072	ATCCCTTCCCTTTTC	0	+
chr1	133022653	133023110	TGATATCTTGTAACC	0	-
chr1	133022676	133023097	CCCAAGCCCCCCTAA	0	+
chr1	133022677	133023091	GTATTCCAAGCCGTA	0	+
chr1	133022682	133023103	GCCCCTGCCAACAAA	0	+
chr1	133022682	133023114	CTTGTCCTGCACCAC	0	+
chr1	133022730	133023132	CTCGAGGTTGAGCCA	0	+
chr1	133206496	133207118	ATTTGGCCCTCGGCT	0	-
chr1	133206545	133207112	CACCGAAACGTGCAG	0	-
chr1	133206550	133207106	ATTGGTTAATGTTGC	0	+
chr1	133206649	133207159	CTGATCTTGTGACGC	0	-
chr1	133206662	133207108	TTAAGCTCAGTGTTA	0	-
chr1	133206695	133207226	TTTTCTATCGAGTGC	0	+
chr1	133206709	133207106	ACCCCACTGTGGTCA	0	-
chr1	133206715	133207120	GCCGTAACCCAAGAA	0	-
chr1	133206741	133207105	CACGTTCTGCACCAC	0	+
chr1	133206741	133207207	TTCCCGAAACGGTGG	0	-
chr1	133206745	133207201	GACCCCTTCTACCCA	0	+
chr1	133206757	133207251	CCTTATCGCCAGAAT	0	+
chr1	133206763	133207303	ATGTTTCAGATTCAG	0	+
chr1	133206768	133207126	TCGCCCAAGATAAAC	0	-
chr1	133206786	133207300	AGGTCATTGAGTGTT	0	+
chr1	133206790	133207162	TCCTCGCCGCATCGA	0	+
chr1	133206793	133207292	ACCGAAGGCCCGGCG	0	+
chr1	133206797	133207441	ATCGTACTACGTCAC	0	+
chr1	133206801	133207238	CCAGTGCCCGCATCG	0	-
chr1	133206814	133207278	TCCCTATAGGAAGAT	0	+
chr1	133206820	133207171	CCCTCCATCCGACCT	0	-
chr1	133206856	133207194	TGTCCTTAGTCTAAA	0	+
chr1	133206864	133207453	ACCTCCACACTCGGC	0	-
chr1	133206873	133207226	TTGAGGAAACCGTAT	0	+
chr1	133206874	133207354	TCCGCCTCCACCCAT	0	-
chr1	133206881	133207301	CATGATTGTAGTACT	0	+
chr1	133206904	133207322	CGGGCTCATTTTAAG	0	-
chr1	133206911	133207377	CCCCCGTCACTCCCC	0	-
chr1	133206913	133207414	GCTCCGAACGTAGAA	0	-
chr1	133206922	133207282	TCCGCCCCCTGACCA	0	-
chr1	133206945	133207335	ACAATCGTCATCAAC	0	-
chr1	133206964	133207407	GACTCCCTAAGACTT	0	+
chr1	133206972	133207617	CCCCCCCTTCTTCTC	0	-
chr1	133206983	133207414	TCACGTGATTGCGTG	0	-
chr1	133206984	133207389	ACATGTTTTGTATTA	0	+
chr1	133206990	133207512	TCACTTGTACTAACT	0	-
chr1	133207001	133207414	TAATTCGGCGCAAGA	0	-
chr1	133207002	133207512	GTGGGTGGACCGGGT	0	+
chr1	133207012	133207383	CGTCAAGCACGACCC	0	-
chr1	133207070	133207634	CCCACGTAGTAGCGC	0	-
chr1	133247836	133248335	GCAGAGAAAAACAAC	0	+
chr1	133247842	133248364	GTAAAGATTCCCCAC	0	+
chr1	133247876	133248355	AACCATCAATCCCTG	0	+
chr1	133247883	133248262	TCGGTCGTTCAACTC	0	+
chr1	133247893	133248384	AAGCCACATATTAAT	0	-
chr1	133247898	133248439	GTCCCCTGAGACGAA	0	+
chr1	133247925	133248474	ACCTTCAGCCGTCCG	0	-
chr1	133247927	133248407	TTCCCAATTGAGCCC	0	-
chr1	133247952	133248407	GCGCGCCGGACGTTG	0	+
chr1	133248004	133248401	GAAAAATGTATGACC	0	+
chr1	133248042	133248580	TAATCGCGCATAGGC	0	+
chr1	133248065	133248570	TGCAGGGGTGTGTTG	0	+
chr1	133248145	133248773	CCACTTTTTAACCCC	0	+
chr1	133248149	133248649	ACAGTGCCCGTCGTG	0	+
chr1	133248173	133248648	TCCACCCCTGCGGGG	0	+
chr1	133248179	133248596	CACCTAGCACCTCAA	0	+
chr1	133248192	133248683	CCGAACGTTCGCGGA	0	+
chr1	133248221	133248663	ATCCAAACCCCCATC	0	-
chr1	133248242	133248713	TAAAGGAACGTATTA	0	+
chr1	133443188	133443717	CCCCTGAAACTTTAA	0	-
chr1	133443236	133443756	GTATGTAAAGGTAGG	0	-
chr1	133443256	133443790	ACCTTTTCACCCGTC	0	-
chr1	133443307	133443790	ATCATGAATCGTCAC	0	+
chr1	133443361	133443901	ATTTACGAGTTAGGA	0	+
chr1	133443381	133443859	AGATTAGAATTTGTT	0	+
chr1	133443385	133443906	ATCCCCCTCGCGGCT	0	-
chr1	133443387	133443748	ACGGTAGAAGGGGCT	0	-
chr1	133443387	133443892	GCCAAATAACGAATT	0	+
chr1	133443416	133443813	TCTTTCCGTGTCGTA	0	+
chr1	133443464	133443794	TGAAGACCGCTAAGC	0	-
chr1	133443501	133443883	TATCAAAATTATTCA	0	+
chr1	133443501	133443901	GTATGCATCTATGGT	0	+
chr1	133584683	133585247	CCCGGTCCCTTGCTG	0	-
chr1	133584713	133585250	ACCCTTACTAATCAC	0	+
chr1	133584755	133585257	CACCTCATAAATTTC	0	+
chr1	133584780	133585282	AAGTCGCTATTTATG	0	-
chr1	133584790	133585357	ACGCGAATCCTAGGG	0	+
chr1	133584802	133585214	CTCGGGCCTTGTCAG	0	-
chr1	133584827	133585354	TGTTGTGGGACATAA	0	+
chr1	133584871	133585302	AGCCCGAGACAATCA	0	+
chr1	133584897	133585478	GTATAGCTGATGTCA	0	-
chr1	133584906	133585244	TACGTAGCTATGTTG	0	+
chr1	133584924	133585501	CATGGGTTGGCAAGG	0	-
chr1	133584929	133585328	ACGCTCAGGACCGCC	0	+
chr1	133584938	133585431	GGTGCCTATGGTAAT	0	+
chr1	133584960	133585398	TTTTCCATGTAAGCT	0	-
chr1	133584988	133585330	TGCGGCACTCGCGAT	0	-
chr1	133584997	133585489	ATAATACAATGTCAC	0	-
chr1	133585006	133585676	CACCATACCGATCTG	0	+
chr1	133585069	133585410	CCTATGCTTTCGGTG	0	+
chr1	133585071	133585559	TCCCTGGCTGCTCTA	0	+
chr1	133585118	133585643	GGAATCGTACGAGAC	0	-
chr1	133585134	133585669	TGATGCTTTGCGTAC	0	+
chr1	134242840	134243445	CCGTTAAATAGAAAC	0	-
chr1	134242958	134243396	ATGTGCCTTACCCAT	0	-
chr1	134242978	134243467	CCCACCATTAAGGCG	0	+
chr1	134242978	134243503	CCGGCGCGAACAACC	0	-
chr1	134243019	134243688	CGCACACCAAACGAC	0	+
chr1	134243029	134243495	CGCGTACCATCCCAT	0	-
chr1	134243048	134243542	ACGTTTATAGTACTA	0	-
chr1	134243050	134243644	TACGCCTCGAGCCCC	0	-
chr1	134243066	134243496	ACAATTACCACATTG	0	+
chr1	134243068	134243569	CTCCACGGACCTGCC	0	-
chr1	134243142	134243630	ACCATTCTCCAATAG	0	+
chr1	134243143	134243544	ACTGCCCCACGAGCG	0	+
chr1	134243145	134243568	ACGCGCCCTCGCTGT	0	-
chr1	134243178	134243658	CAAACACCCCACAAT	0	+
chr1	134243180	134243467	CCCACCATTAAGGTG	0	+
chr1	134243180	134243606	TTCACTGGGTCTTGC	0	+
chr1	134243183	134243634	ATATGATTAAGGGAG	0	-
chr1	134243213	134243628	TTTGGAACCGAGAGG	0	+
chr1	134243224	134243677	CACATCTACACTCTC	0	+
chr1	134243284	134243864	CCCCCTATCCCATAA	0	+
chr1	134425148	134425657	TCCGAGCTTCTTTTG	0	+
chr1	134425346	134425825	CCTTACTGAGACCT	0	+
chr1	134425398	134426020	CGCACAGACGCTACC	0	-
chr1	134617692	134618231	ATTCGTTGAATCCGA	0	-
chr1	135258398	135258843	TGGGAACGTCGGGTA	0	+
chr1	135258441	135258895	ACCACAAATGATGAA	0	-
chr1	135258606	135259161	AATAAGCCTATAATC	0	-
chr1	135367176	135367567	AGGGCAGCTGTCCCA	0	+
chr1	136169197	136169757	CAGCTCGAACTCTGA	0	+
chr1	136169349	136169860	TGCTGTAAGTCATGA	0	-
chr1	136169353	136169781	AAGTTCTACCGTACC	0	+
chr1	136169374	136169795	ATCTATAGCCACATT	0	-
chr1	136169379	136169904	CGACAACTGCCGGTT	0	-
chr1	136169396	136169919	AATACTCGCGATACC	0	-
chr1	136169396	136169930	GCCCCGTTGCTGCAG	0	+
chr1	136169449	136169940	CCGAGCAGGCAGATT	0	-
chr1	136169455	136169849	TAACACCCATCTGAC	0	-
chr1	136169546	136170033	AGATTTTAGGAAGCT	0	-
chr1	136170762	136171265	TAAACGTCGATTGAC	0	+
chr1	136170840	136171366	CCGCCGCGATGTCCG	0	+
chr1	136171002	136171406	TGGGTCCTAGTGTGG	0	+
chr1	136171038	136171486	GCCGGCAAATTGACG	0	+
chr1	136171044	136171560	GCCGAATTTGCTTAA	0	+
chr1	136171047	136171479	TCACTTATCAAAATC	0	+
chr1	136171069	136171335	ATCTGAACAAAGCGT	0	+
chr1	136171070	136171333	CTGGACTGTTCCTTC	0	+
chr1	136171072	136171541	GACGGGGAGGGGCTC	0	+
chr1	136171126	136171550	GCAGTATTTGCTTGG	0	+
chr1	136171139	136171628	CACCTGTCCACCCCC	0	+
chr1	136193580	136194190	CACCCCGATCACCGG	0	+
chr1	136193720	136194197	CACATTTCTTGCCCC	0	+
chr1	136193784	136194200	CTAAAAATACCTATG	0	-
chr1	136193824	136194170	TCCCGCGTCACCCGT	0	+
chr1	136193852	136194280	TAAACTCCTCGCGAA	0	+
chr1	136193887	136194476	CGGTTAGACGGCTGA	0	+
chr1	136193917	136194353	ACGCGGGCCCTAGTT	0	-
chr1	136193956	136194492	CGAGCTTATTCAAGC	0	-
chr1	136194046	136194440	GGTGGTGATGTGTTG	0	-
chr1	136336331	136336860	ACAGTAATATAAGAA	0	-
chr1	136455047	136455525	AGCCACCCATACCCC	0	+
chr1	136455064	136455486	CAAGCCCTACTGCCG	0	+
chr1	136455114	136455632	CATATAGGACTCAAG	0	-
chr1	136455187	136455660	CTCCACCACCACCAC	0	-
chr1	136455245	136455769	TCCATTAGCAGCAGG	0	+
chr1	136455330	136455750	CCCATTCCCCGGCGG	0	-
chr1	136463700	136464249	ACAGATACCTCAGCC	0	-
chr1	136463829	136464358	CTAGGAACAGGAGGT	0	-
chr1	136463924	136464448	GACTATATGCATCAG	0	+
chr1	136463928	136464338	TTGACGTACACAGAA	0	+
chr1	136463936	136464426	GCGACCAATGGAGCT	0	+
chr1	136463940	136464402	AAAGCAATCTCTACT	0	+
chr1	136463944	136464408	CCAAACGCTCGTTCT	0	-
chr1	136463962	136464538	CGTTTTGTCACTAGG	0	+
chr1	136463975	136464339	GGGTTATTTTATATT	0	-
chr1	136464028	136464524	CATAGTCTAGAATAT	0	-
chr1	136464062	136464415	ACCTATTTACATTTC	0	+
chr1	136464072	136464499	CGCTGACACAGCAGC	0	-
chr1	136464112	136464621	CTGGGGTAGAGCGCC	0	+
chr1	136464129	136464722	CAACAGAAGTAGTAC	0	-
chr1	136464132	136464649	CCCACTTACAATCT	0	+
chr1	136464232	136464588	ACCGTGACTATACAT	0	-
chr1	136674465	136675082	AGAGGGTCGAAGTGT	0	+
chr1	136674483	136675006	CACTCAAGTGTGTGA	0	-
chr1	136674504	136675005	AACAGAAAGATATTG	0	-
chr1	136674532	136675120	AATTTGGCTAACGCA	0	-
chr1	136674549	136675123	CCCCAAATCCAGTTA	0	-
chr1	136674554	136674971	AAAATCACTGATTCT	0	+
chr1	136674587	136675141	CACTTTAAAGCCTTC	0	+
chr1	136674594	136675060	AAAGCGAACGCGTTT	0	+
chr1	136674647	136675060	CACCCCCACCTTTGA	0	+
chr1	136674664	136675072	CCCGCACCAACCCCT	0	-
chr1	136674694	136675211	TAACTGACGATGTGC	0	-
chr1	136674723	136675130	ACCCATAAAGGACAT	0	-
chr1	136674768	136675243	CTAGTTCGCCTGACC	0	+
chr1	136674806	136675214	GGCCGCCGACGTTAC	0	-
chr1	136806232	136806814	TACCTGCCAATATGA	0	+
chr1	136806296	136806782	GCCTCCCCGAAACGC	0	-
chr1	136806387	136806808	GCGTGGGGGTATGTG	0	-
chr1	137052817	137053429	ACAGCTGACGGATAA	0	+
chr1	137277072	137277495	ACAGCATCGCCCGTT	0	-
chr1	137277077	137277503	GATGTGCGTAGTCCC	0	-
chr1	137277116	137277566	ACCCAGCATGGCTAA	0	+
chr1	137277136	137277687	GCCGTGACAACTAAC	0	-
chr1	137277154	137277504	CATCCATTATGACCA	0	+
chr1	137277166	137277753	CCCCCCCAAACCCTA	0	+
chr1	137277169	137277613	TCATAAAAGCAATTG	0	-
chr1	137277180	137277742	GCGCAACACCCAAG	0	-
chr1	137277190	137277701	CCCAGACACGCCGTC	0	+
chr1	137277219	137277787	GCCAAAATGGAACAG	0	+
chr1	137277235	137277631	CCGGACCGCCACCAA	0	+
chr1	137277263	137277769	TCTCCCACCAACCCG	0	-
chr1	137277269	137277847	CCCTTAAGCATAAAA	0	-
chr1	137277307	137277763	CTGCTAATCTCGCCA	0	-
chr1	137277320	137277794	CGCAAGCCTGTAGCT	0	+
chr1	137277361	137277737	ATAGAGCTAGCGATG	0	-
[truncated: 43,671 more rows]

## Sheet: MiSeq_off-target
track name="MiSeq_off-target" description="Off-target_captured-and-cloned_fragments" visibility=full
chr1	12115339	12115742	TCACGTGTAGAATCT	0	-
chr1	32528852	32529216	GTCTTATTAGAGGAG	0	-
chr1	34392720	34393141	ATGAACCCTTTGCGA	0	-
chr1	35373123	35373538	CACCCGGTCTGATCC	0	+
chr1	36665519	36665978	TGACGTTGCAGCGCT	0	+
chr1	40363805	40364230	CCTCCGTATCTACGG	0	-
chr1	40813942	40814329	TCCCCCCCCTAACGG	0	+
chr1	43216101	43216574	TTCCACTGGTATGTA	0	-
chr1	46994784	46995344	CACGACTCTATGAGA	0	-
chr1	54315083	54315548	TTAAGCGATCGATAG	0	+
chr1	55145549	55145986	GGAGTCGATCGACCG	0	-
chr1	55215957	55216454	CTCCGGAGAGTAGAT	0	+
chr1	61171319	61171688	GAGGACTGCCGCAAC	0	+
chr1	82455060	82455562	GTCATGATGAGCATG	0	-
chr1	91794156	91794641	AGGCCGTGGCAGATT	0	+
chr1	94777348	94777884	TTAACGCTAATAACC	0	+
chr1	107794963	107795446	GAGTAACCTCCTAAA	0	+
chr1	110380281	110380622	ACGTGGCAGGGGGCA	0	-
chr1	119557733	119558147	ATCTGCGTCAGATCA	0	+
chr1	121075053	121075618	TACCGAAAATACGCT	0	-
chr1	123296275	123296723	AACGTATACATAAGT	0	+
chr1	128352728	128353232	TCCGCACTCTCATAA	0	-
chr1	130941919	130942536	GTATACCAACACTAC	0	+
chr1	130942126	130942550	GCTTATCAACAAGAT	0	+
chr1	130942145	130942738	CCATGTCATCGAACT	0	+
chr1	140869235	140869669	ACAGGTAGTTGCTCG	0	+
chr1	148305339	148305814	ACTCCGACGCGCTGC	0	-
chr1	151005562	151005989	ACGAGTTCACACAAA	0	-
chr1	154233815	154234243	CCACCTGAGAGACCA	0	-
chr1	154233815	154234243	ACGACTTTATGGGTC	0	-
chr1	162129117	162129612	CCGGCTGAAACGAAG	0	+
chr1	163153406	163153940	TTATACCAACGAATG	0	+
chr1	165715678	165716098	TTTATATACTGAGCT	0	+
chr1	166875429	166875939	AAAGGAAACGCACGC	0	+
chr1	166875537	166875923	AAGTAGTATCTGAAA	0	-
chr1	166875802	166876246	GGTTGGACCGGCCAG	0	-
chr1	170244342	170244789	GCGGCCTCATAAGAC	0	+
chr1	174180947	174181287	TTACTTTACCTTAAT	0	+
chr1	174180947	174181287	AGCCATTTGGACCTG	0	+
chr1	179254577	179255148	CGGTGGTACCTATGC	0	+
chr1	181012163	181012635	GCTTTATATACTAAG	0	-
chr1	184896560	184896920	CTCCAACACCGCTCC	0	+
chr1	185465729	185466091	CCCAAAAACTACACA	0	-
chr1	187183476	187184090	CGTTATGACTAGTGG	0	-
chr1	191078610	191079022	TCAGGGATCTGCTTC	0	-
chr1	191078727	191079223	CATTGCACCGGATCT	0	-
chr1	193493880	193494395	TACCCGTTTGTCACA	0	-
chr10	4109585	4110047	GCCCAGATGTAGCAG	0	-
chr10	11323460	11323860	TCGCCCCGCGCGTGC	0	+
chr10	12241870	12242442	CCCCACGTGTATGCC	0	-
chr10	13065981	13066504	GAACAGCCTGCTATT	0	+
chr10	17955095	17955637	ACTCCATATGAGTTA	0	+
chr10	19381032	19381472	CATCCAAAACTGGAG	0	-
chr10	22110805	22111376	TAAGAAGAAACCAGA	0	+
chr10	34183653	34184146	ACCGACATTAGATCA	0	+
chr10	40757111	40757516	GTCTTACCAAATGAC	0	-
chr10	44273057	44273578	ACAGCCATCGCCAAT	0	-
chr10	63511934	63512311	ACTTGTTGTGCAACG	0	-
chr10	66098870	66099430	TAGTATTTATGTGCG	0	+
chr10	67865810	67866287	GATGGACGGTGGTGT	0	-
chr10	68562061	68562467	AGGGTTTTGCCTCTT	0	-
chr10	74686861	74687230	ATTCCTTCTGCAACA	0	+
chr10	80041442	80041777	CCTACGCCATCTAGA	0	-
chr10	92322002	92322512	GTCAGTACCACCACT	0	+
chr10	92869386	92869760	CTTCCTTATCTATCG	0	+
chr10	92869386	92869760	CCCGAAGGACGCGGA	0	+
chr10	94975090	94975630	ACAAAGCGAAATCAT	0	+
chr10	96218775	96219195	GAGCAGGCTTATCAC	0	-
chr10	101507622	101508177	GCTCGACAACATCCT	0	-
chr10	108515133	108515771	AACGCCAGAGAGAAT	0	+
chr10	108883757	108884199	TCCACCTTTGCATAG	0	-
chr10	110702982	110703425	ACCGAACACAAGCAC	0	+
chr10	112996349	112996810	CCCAGCTCTGATATT	0	+
chr10	116822243	116822774	CACGGAGCGTAGTTG	0	-
chr10	118408896	118409358	TAGGTGTCGTGGCCG	0	+
chr10	125541313	125541839	CTCCTATCCCCAATG	0	+
chr10	126266811	126267246	ATTACCAAGCTGTGG	0	-
chr10	128330181	128330614	TTTTACTACGCCTTT	0	+
chr11	3070718	3071171	CCTTCCTCGCTAAAT	0	+
chr11	9483570	9484025	ACCAGACTTCTACCG	0	-
chr11	9483778	9484305	CTGGCCTCTTATTAA	0	-
chr11	18249377	18249851	TTTATGGCCATCATT	0	+
chr11	24175585	24176094	GCCTTCCACCCTCCT	0	+
chr11	30135714	30136155	CCCTTGCCCAAATCA	0	-
chr11	33209563	33210063	ACCTGACAACAATCG	0	+
chr11	38408890	38409384	CTCCCAAAATGTTCG	0	-
chr11	43618260	43618763	CACGTGCTCTAACTG	0	+
chr11	44818913	44819418	GGGTCTACGTCTCGA	0	-
chr11	49176250	49176871	AATACACTGTTTAGA	0	-
chr11	53664807	53665168	AGATTTCGCATGTCA	0	+
chr11	56171496	56171902	ATTCCCCTCACCTAG	0	+
chr11	56171501	56171908	TGGGGAGTGCCGCAG	0	-
chr11	57406435	57406849	CAACGAGACTAACCT	0	-
chr11	57406435	57406849	GTCCAAGCCTTGTAT	0	-
chr11	58959528	58959920	CTGTGCATTTAGTTT	0	-
chr11	62049927	62050471	CACACATGTGCTTTC	0	+
chr11	64880845	64881501	CCTCCCTTACGACCC	0	-
chr11	68315645	68316088	CCCGGATTATACCTA	0	+
chr11	69339659	69340133	CTCTCATGGAGACGA	0	-
chr11	71468419	71468884	CTACCGACGAATACC	0	+
chr11	72597980	72598426	GCCTAACCGGCGGTT	0	+
chr11	76073219	76073558	ACCAATTTTCACGCC	0	+
chr11	77837258	77837741	GACAAATCCCACCGA	0	+
chr11	81069633	81070036	AAATGCACTCCTACC	0	+
chr11	81069633	81070036	ACCCAACAACGGAGT	0	+
chr11	83468621	83469074	TCCATACCATTCAAG	0	+
chr11	84505376	84505816	AGCACAACTTAGCCA	0	+
chr11	86716999	86717463	CCTGATACCACGTT	0	-
chr11	86717016	86717387	CCCACCAACCCTCTC	0	-
chr11	86717036	86717452	GACCATAAACATTAT	0	-
chr11	86717043	86717493	CTCAGCTGCGCAGCA	0	+
chr11	86717045	86717469	TTAGAAATACTTAAT	0	-
chr11	86717053	86717486	TTAAGGTGCAGTGCC	0	+
chr11	86717096	86717534	CTACTATAAGCTACT	0	+
chr11	86717186	86717611	ACCTCATTAACACCC	0	-
chr11	86717267	86717656	CTCGATCCCCTATCA	0	+
chr11	87710274	87710727	TAATCATTTAGATGG	0	+
chr11	90150322	90150767	CCCGTGCCGAGCACC	0	+
chr11	90858773	90859251	ACCCATACACCGAGG	0	+
chr11	93427930	93428462	GACGTCACTGTCCAA	0	-
chr11	97499910	97500463	CTGTAACAGTACTAC	0	-
chr11	99422996	99423411	CCTCCCAAGAGTCCC	0	+
chr11	100671525	100672000	TATCAAGACTTTTCC	0	+
chr11	102077375	102077767	GGGGGAGGCCGATGG	0	-
chr11	103821874	103822341	CGAGACTCTTTCGCC	0	+
chr11	104244495	104244917	ACCAACCCTACAAAT	0	-
chr11	106219881	106220342	GCCGTAACCTTGACA	0	+
chr11	112689889	112690337	TCCCAAGCGGCGTCC	0	-
chr11	113625714	113626311	AGACGCCCATTTCTC	0	+
chr11	114579026	114579627	TGTATGCTTCAGCAT	0	+
chr11	116126878	116127317	TACTAGTAAATGGCC	0	-
chr11	117490915	117491407	ACACCATTCATCGTG	0	-
chr11	118785392	118785914	TCCTCGTGTGACTTG	0	+
chr11	120730731	120731356	GCGTTAATGCGAATT	0	+
chr12	3109888	3110099	GGCTGCGACCTTCCA	0	-
chr12	8690867	8691320	AGAGCTGGCTTGGAG	0	+
chr12	18421738	18422209	GTATGGGGTAAGTAC	0	-
chr12	22032424	22032875	CCAGATGCGCGGGGC	0	+
chr12	26547052	26547566	CCACCAGCTGCCACC	0	+
chr12	29756430	29756891	CGATACACTGCAACC	0	-
chr12	30682496	30682908	TTCCCCCTCAACAAT	0	-
chr12	31533954	31534388	GTGGATTATAGAATG	0	+
chr12	35657338	35657732	AACTCTCATCCTAGC	0	+
chr12	49551405	49551804	GCATATCACTAGAGC	0	+
chr12	53339195	53339702	GCTCAGACCCCGCCA	0	+
chr12	55417635	55418104	TCATCCATCGAACAA	0	-
chr12	87107025	87107488	CCCGGTATGAACCAC	0	-
chr12	88299024	88299472	AAATAGAAATTATAT	0	+
chr12	91686968	91687387	TGAACCGACAAGTGT	0	-
chr12	92860041	92860526	GCACGTCAGCCACAC	0	-
chr12	92860053	92860457	AGGCTTGTGGGACAG	0	-
chr12	92860330	92860792	GATCCTAATTACTTC	0	+
chr12	95888907	95889349	GACCCCCTCTCAGCA	0	-
chr12	100818604	100819089	CCCTCGATTGCAGCG	0	+
chr12	100855021	100855663	CGGTCTAGGGTCCTT	0	-
chr12	100983362	100983828	GCAGCAAACTGACGC	0	-
chr12	103233047	103233422	ACAACTCAAAGGTTC	0	+
chr12	109138275	109138723	CCGGGTAATTGTCTG	0	-
chr12	119778004	119778448	TTCTGCCGTTCCCCC	0	+
chr12	119778069	119778568	CCAGACTATTTTAAA	0	+
chr13	3661899	3662314	CCCCTCACGGCTGTT	0	+
chr13	3731005	3731515	GCCAAAGGACGACGT	0	+
chr13	4426767	4427244	AGATTCTGGTACGAG	0	-
chr13	6994491	6995093	AAAAGTTATGCGCAT	0	+
chr13	9399225	9399753	ACCCGGTGCCACCCA	0	+
chr13	24749196	24749648	CCCCCCCCTCATCTA	0	+
chr13	30885030	30885532	ACGGTACGTGTTGAG	0	+
chr13	35907418	35907871	CCAAACAGTTTCGAA	0	+
chr13	38020367	38020903	CCCCCCAGCGACCTA	0	+
chr13	39607326	39607793	TAGGGGCCGTTAAGA	0	-
chr13	45877325	45877831	CCCACACAATCCAGC	0	-
chr13	46287588	46288043	CCATGACATATGATG	0	-
chr13	47473605	47473992	TTCATTGCGAATCAC	0	+
chr13	48102674	48103183	AGCTCTTGCAGCGAA	0	-
chr13	60172390	60172935	TCAGAACTGTATCTA	0	+
chr13	64477476	64477995	AACGCCAGCCAATAC	0	+
chr13	68423462	68423856	CGCATAGACTCCCGT	0	-
chr13	80536212	80536734	TGCACCATGTTAGCT	0	-
chr13	80682106	80682575	CCAATAATAAGACCG	0	+
chr13	84153769	84154218	CTCCACCACCCATAG	0	+
chr13	103911126	103911574	TTTACCAGGTGCAGT	0	-
chr13	104661542	104662056	GGCGGCGTCTTATAC	0	-
chr13	104661593	104662031	ACACGAGCAAGGAAC	0	-
chr13	104661643	104662122	GCAAGGGTAGGGTAA	0	+
chr13	104661643	104662122	GCAAGGGCAGGGTAA	0	+
chr13	104661714	104662298	CCCCCACCCCTGCCA	0	-
chr13	109846685	109847125	TGTGCGAACTACTCG	0	+
chr13	110198788	110199213	AGAACATCTGTGGCC	0	-
chr13	119171069	119171488	GCGTATTTGTTAGAT	0	-
chr14	27247986	27248562	ATCCGCTGCCATTTA	0	+
chr14	28559352	28559802	CCCATCACCTCCTGC	0	-
chr14	31063642	31064017	AACCAGCGAACTTTT	0	+
chr14	35414295	35414858	CCCACTTTTTCACAA	0	-
chr14	35414605	35415027	ACCGGAACACAAGGC	0	-
chr14	37067348	37067863	GCCACCTTTTCAAGC	0	+
chr14	39900580	39901018	CCCCCCTGCAGACAC	0	+
chr14	49372990	49373575	CCCACCTATCGCATC	0	+
chr14	56533486	56534016	AGGAACATCTCATCA	0	+
chr14	63386533	63387011	ATTACATTCAGTGGG	0	-
chr14	69650329	69650761	TCGCCAATGTACGCG	0	+
chr14	69884922	69885292	TAATCGAAGACTAGA	0	+
chr14	71187660	71188225	AGCTCCGCTGCCTCG	0	+
chr14	75624639	75625082	GAGTCCTCCGATACA	0	-
chr14	76851379	76851927	GGCCGCAAACAGAAG	0	-
chr14	82118473	82119035	TAGCTGGCCCAATAT	0	-
chr14	95447523	95447938	ACGTGGGTGGATTTT	0	-
chr14	110157095	110157723	ATCATCCTCATTTAA	0	-
chr14	115348033	115348603	AGTCCGACGACATAA	0	-
chr14	119228734	119229158	CAGAGAGACACTAAA	0	-
chr14	119228937	119229484	TTGACCAACAAACGA	0	+
chr14	119229022	119229499	CTAATTTCTCCTACT	0	+
chr14	119229047	119229431	CCCCCATATAACCCA	0	-
chr14	122895889	122896416	TGATCTAATCCTGAT	0	+
chr15	16142499	16143079	ATTGTGACGAGCTCA	0	-
chr15	23230489	23230854	CCTATCCTAGCCACC	0	+
chr15	25433524	25434033	GGTTTAAACTGGCAA	0	-
chr15	25912663	25913166	TCCCATCGCACAGCC	0	-
chr15	41397919	41398396	GTATCAATACACATC	0	-
chr15	41816340	41816771	TGGATCAGTGATACT	0	-
chr15	43897721	43898214	TCGACGACACCGGGG	0	+
chr15	44659679	44660086	ATGGGAATTACGGTC	0	-
chr15	49816926	49817415	ACCTTAGAGCACGAC	0	+
chr15	51861691	51862196	GGTCGAAGGGTGACA	0	+
chr15	57512355	57512870	AACTAAAGGAGGAAA	0	-
chr15	62334703	62335146	CCACTATCAAGGCTG	0	-
chr15	62334703	62335146	AATTAGAACCGTAAT	0	-
chr15	75443528	75443989	CGCTCTATAGAAATC	0	+
chr15	75443635	75444099	CTCACTTCTGAGTTC	0	+
chr15	75443801	75444268	GCCATACCGCCCACT	0	+
chr15	75443820	75444263	TCAAACAGATGAACC	0	-
chr15	76067193	76067711	GGACACGCATCGAGT	0	-
chr15	79277324	79277824	CCGTGCCGCAAATAA	0	-
chr15	80774384	80774842	GCCGCTGGGCAATCA	0	-
chr15	83131773	83132224	AGCTATGTACACAGT	0	-
chr15	85076476	85076908	AATTGGTAGCTTCAG	0	+
chr15	91689091	91689503	TTGCTGCGAGAGGCT	0	-
chr15	97904040	97904445	AACTACCGGTCAAAC	0	-
chr15	101688678	101689099	GATCAATGCTGTTAC	0	-
chr15	102473947	102474602	ACGCCGTACGATACA	0	-
chr16	4790836	4791298	TTCCATACGATAATG	0	+
chr16	6786707	6787176	TACAATCCAAGAAAC	0	+
chr16	8082795	8083266	AAATATGCTCACTAA	0	+
chr16	11057311	11057775	CGCCGCCGCGCGCCC	0	+
chr16	13610700	13611094	CCCGCGACACATGCC	0	+
chr16	17705937	17706333	ACCAGCCGCCCCCAC	0	+
chr16	18975970	18976557	TACCTAGACCAGATC	0	-
chr16	18985410	18985895	AAAAACATCTAATGC	0	+
chr16	24837071	24837556	GACCACTAAAGAAGC	0	+
chr16	26498697	26499094	AGAAACATAAGAATC	0	+
chr16	29697344	29697728	ACAAGCATCGTCTG	0	-
chr16	31913012	31913441	ACTTACTGCGCATCG	0	+
chr16	32625797	32626257	ATGTAGTATAATCTG	0	-
chr16	35721834	35722320	GTAATGCACAGATAA	0	+
chr16	35721942	35722369	AACCACACTAAGTCT	0	+
chr16	35722153	35722537	TCTTATAGTCTTTCG	0	+
chr16	38103606	38103994	AACCCAGGGTTGCCC	0	+
chr16	44359509	44359932	ACTCGTCTCTGTAGC	0	+
chr16	45901126	45901758	TGAAATGGTTAGCAA	0	-
chr16	51621815	51622433	AGCTTATCAATATGC	0	-
chr16	55573410	55573821	GCCGCCGCTACACTT	0	+
chr16	58459819	58460293	TAATAAGAAGTAAA	0	-
chr16	87836679	87837036	AGGTTGGTAATGGCT	0	-
chr16	89452790	89453204	GCCCTCTTCTTGCTG	0	+
chr16	89598891	89599345	GTCTACACCCATCGA	0	+
chr16	90194245	90194556	GACAGTCCTGGAACT	0	-
chr16	90575945	90576371	CCGCTGTCCCCTCCG	0	-
chr16	92349801	92350259	CTCTGCTGCCGAGAC	0	-
chr16	92411021	92411599	TCGTCGGCGCGCGGC	0	+
chr16	96533659	96534237	AGTTCTAGCCAATTT	0	-
chr16	96533659	96534237	TCCCCCCCGGGCCTC	0	-
chr17	16958412	16958842	TGGGCAGCGGGAATA	0	+
chr17	16958475	16958981	TCACACCGCAACGAA	0	+
chr17	16958557	16958994	CTATATGCCCAACGA	0	+
chr17	23279529	23280050	GCCCCCGGGGCGCAC	0	-
chr17	27815606	27815912	GTCGTCTAGCAAGCG	0	+
chr17	29900640	29901058	CAGCCCGGATATTGA	0	+
chr17	34945331	34945824	CGCTGCCCCATTGAG	0	+
chr17	34945432	34945860	ACGAATAGGTGATAC	0	-
chr17	34945467	34946009	TTCGCATAAAAATTC	0	+
chr17	34945496	34945936	AACCGGGGTCTAGCC	0	-
chr17	34945534	34946013	GCAACCTCAATCCAT	0	+
chr17	34945617	34946049	TCGGCGAAAAGGACG	0	+
chr17	35007001	35007415	ATCAACATGTAGCGG	0	-
chr17	35007003	35007338	ACCTGTTTACATAAA	0	-
chr17	37012679	37013150	ACCGTTTCACCACTT	0	+
chr17	44095564	44096005	CTTTTATGAGGACTA	0	+
chr17	46411098	46411716	GGCTTCCTCGGACCG	0	+
chr17	61484980	61485474	CTTAGTTCGGGGGTG	0	+
chr17	71257651	71258145	TTGGTAAGCGCATAA	0	+
chr17	76016468	76016889	AACCCTCCTTGCCTC	0	+
chr17	78716044	78716513	GCACTCATGTACACG	0	-
chr17	78939626	78940116	AACCTGTAGCGATGG	0	-
chr17	83906949	83907542	AACCCTCACCGTCGT	0	-
chr17	89104705	89105163	TGTCAAACGCACATA	0	-
chr18	9715159	9715550	TCCATGCATCATTTG	0	+
chr18	12226494	12227034	CTCCCACTGCCCCAC	0	+
chr18	15231530	15231982	GAGCCCCCCGAGGAC	0	-
chr18	22196848	22197420	GTTAGTGGTTATGCA	0	+
chr18	44796482	44796842	GGCACTAAGCGCTAC	0	-
chr18	58735363	58735760	CTTCGACCGCGTCAA	0	-
chr18	61994610	61994996	CTGTCCGTGAAAACC	0	-
chr18	62241151	62241582	ACCGCGTAACCCCCG	0	+
chr18	68761373	68761786	GTGACATTACATAAT	0	+
chr18	76373933	76374476	CGTTATGTCATCTAT	0	-
chr18	76428566	76428868	TTCTGTTATCTCGCA	0	-
chr18	77248686	77249290	GACCAACCTAGCGTA	0	-
chr18	79507996	79508483	GTGGTTAGGCCCTCC	0	+
chr19	8206551	8206974	CCTTCCTAACGGCCT	0	-
chr19	8206553	8207005	TCTCTAATTTAGTAC	0	-
chr19	8206588	8207050	AATCTTTTGCAGCTA	0	+
chr19	8206603	8207237	ACCTCCCAAACTCGT	0	-
chr19	8206662	8207263	ACCTGCAACCGCAGA	0	+
chr19	8206668	8207140	GCCCCGAAATCCGGG	0	-
chr19	8206752	8207258	CCCAAACATTTATAA	0	-
chr19	8206755	8207265	CCCTTTACCCAAACA	0	-
chr19	8206761	8207264	ACATGTCAGCAGCGC	0	-
chr19	8206786	8207261	AGAGCTGAAGACTTT	0	+
chr19	8206871	8207377	CTACGCATCAGTACA	0	-
chr19	18193003	18193523	TTCCCCAAACAACCA	0	+
chr19	31686560	31686999	CTCTACCCTCGTCTA	0	+
chr19	34296759	34297222	GCACGCCACCTTAAC	0	+
chr19	44457894	44458273	TTAGGAGGATGCTTC	0	-
chr19	46875255	46875705	ATGAACAGGCCTAAG	0	-
chr19	46875255	46875705	CCCCTCCAGTAGCCT	0	-
chr2	11520130	11520635	ACGACTCATAGTTCT	0	-
chr2	20093850	20094319	AGTAACGCAGGTTCC	0	-
chr2	24508981	24509480	TGTAAAGCATCTTTG	0	+
chr2	25082637	25083160	TTCTGTACCATCTCG	0	-
chr2	27995010	27995210	GCAACTACTTCGGCT	0	+
chr2	30553596	30554056	ATCAGCGCAAGGTTA	0	+
chr2	30553596	30554056	CCACTTTCCTATAAC	0	-
chr2	34621829	34622425	CCTTCCCTAACACCG	0	-
chr2	36709928	36710406	ACCGGTGAATATGAT	0	-
chr2	44440232	44440596	AGCACGTACCTTAAG	0	+
chr2	49299760	49300224	ATTTATATCCCGCCA	0	-
chr2	50124056	50124593	TCCTGCGTTCTCACA	0	+
chr2	50591720	50592159	TACTAAGACTGCCCAT	0	+
chr2	51888702	51889139	AAGAGACGAGGTATC	0	+
chr2	64586740	64587122	AACTGCCATATGTTA	0	-
chr2	66592767	66593217	CAGGCGCACAAGCTA	0	-
chr2	71413206	71413661	CCACCAATGACTGAT	0	+
chr2	75231066	75231534	AAAAAGACCACCCAA	0	+
chr2	75231080	75231633	AATAATGAGTGGCAT	0	+
chr2	76272457	76273009	GGTCGCTTCAGGGGA	0	-
chr2	84128668	84129056	CGCTAAAAACATTCA	0	+
chr2	84215309	84215695	GCGCCGAAAAAAGTT	0	-
chr2	84530339	84530766	GGACCCAGAAGTCTA	0	+
chr2	84664865	84665475	CGACGCCTATACATA	0	-
chr2	86075458	86076002	CGTACGGTTATAGGT	0	+
chr2	89083396	89083788	CCTCATTTATAATCC	0	+
chr2	89083421	89083820	CGGGGGGGCGATCGC	0	+
chr2	91742886	91743337	GGGCCCTCTACTTCG	0	-
chr2	95881948	95882323	TGGAACGCCCCGGCA	0	-
chr2	98506709	98507117	GTCCGGTGTCAATGT	0	-
chr2	98506716	98507084	CCACGCAAGTTATGA	0	-
chr2	98506785	98507024	CAACCAAATAATAAC	0	-
chr2	98506800	98507423	CACTCACTCACCGTC	0	+
chr2	98506807	98507406	TGTCCCTTAAACTCT	0	+
chr2	98506831	98507480	GCTGAGCTCCCGCAA	0	-
chr2	98506833	98507494	TAAGAATGTTTGCAT	0	+
chr2	98506836	98507496	TTGCGACATGTGCGC	0	-
chr2	98506842	98507061	TCCCGTCAACATCCT	0	-
chr2	98506859	98507321	AGCTTCTGAACTAAA	0	-
chr2	98506865	98507084	ACTTTATACAATGAC	0	-
chr2	98506867	98507327	GCACCAGATATTCGT	0	-
chr2	98506885	98507140	TACGCCACCCACGTG	0	-
chr2	98506889	98507174	TACTACCCTCACTCT	0	+
chr2	98506891	98507124	ATTCACAAAAAGGAA	0	-
chr2	98506926	98507141	CAGGCCGAAAGTGCG	0	-
chr2	98506931	98507352	GAGATGCGTAGCTGC	0	-
chr2	98507220	98507447	CCCAAAGACTTACGT	0	-
chr2	98507267	98507488	GTCCTTACTTTGTCT	0	-
chr2	98507267	98507502	ACAAGGGGATGCCAC	0	-
chr2	98507275	98507495	GAACACGGAAAAGAC	0	+
chr2	108327152	108327688	AAATTTGAGTCGTGA	0	+
chr2	114514735	114515183	TAGTGGGGCTCTCTA	0	-
chr2	118467369	118467841	TACCGAGTCCCCTTC	0	-
chr2	121659224	121659655	TGATTGAAAACGCCA	0	-
chr2	122338165	122338522	CCTCCCGTTTAACTC	0	-
chr2	127847799	127848314	ATCGGATAGTGGAGC	0	-
chr2	132116445	132116888	GACATATCCTCACAC	0	-
chr2	139054849	139055255	CTGAGGCGCGAATAC	0	+
chr2	141726668	141727164	CGTTCGGAACTTATC	0	-
chr2	144057983	144058432	CCAAGCGGGCCAAGT	0	+
chr2	144057983	144058432	AAGAGGACAGTAGCC	0	+
chr2	144580223	144580558	TTTGCGAGCGCGGGG	0	+
chr2	144927086	144927639	TGAGATATGAAGTTA	0	+
chr2	144927168	144927589	AACCCTTAGAACTCT	0	-
chr2	144927255	144927820	TAGCTGGACACATCA	0	-
chr2	144927258	144927748	CACAGCCAAAATGGT	0	-
chr2	144927309	144927701	ACTAAAGGATAGGAC	0	-
chr2	144927365	144927786	CACAGAGGAGGTAGTT	0	-
chr2	144927408	144927873	AAATTGACTATGTGA	0	-
chr2	144927455	144927870	AAGGAGGTGCGAGGG	0	-
chr2	144927512	144927844	CGACCCTCTGGAAAG	0	-
chr2	144927551	144927978	TAAGACGTCCCAGTT	0	+
chr2	144927551	144927978	GTCGGCATACTTTAA	0	+
chr2	145493994	145494355	CTCACCACGCCATAG	0	-
chr2	146638422	146638943	ACACATTATTCTAAA	0	-
chr2	148492233	148492613	GACCCCCGTCCGCCC	0	+
chr2	150712162	150712514	AGCTGATACTCTTTC	0	-
chr2	152039816	152040261	GGATGCCTGGTAACA	0	+
chr2	155166289	155166774	GACCTGACTACGGAA	0	-
chr2	155594218	155594731	ACCCACCATGCGTGC	0	+
chr2	155818166	155818509	GCCCGCCCCATCCGA	0	-
chr2	156204228	156204574	GCTAGGGCGTTTTCC	0	+
chr2	158604727	158605241	TACTCTTTACGATCC	0	+
chr2	164551978	164552484	CCCAGCTCTGCTCAT	0	+
chr2	166067649	166068064	TGACGGTGTATTAGT	0	+
chr2	166067694	166068082	GTCTGAATTCCTTAG	0	-
chr2	166067694	166068084	ACTTCCCTATAAGGA	0	-
chr2	166640166	166640619	GCTTCTTTATGCGTA	0	-
chr2	168904462	168904797	CCAGTTCAAAATACG	0	+
chr2	177483161	177483640	CGCAACGCCGAAAGG	0	-
chr3	5071665	5072164	ACAGACCACTTTACA	0	+
chr3	10283179	10283603	AAATGGCCACAACAT	0	+
chr3	13146032	13146471	GACAACCGACTTGTA	0	-
chr3	17469747	17470059	CGACACCTTCCGTAC	0	-
chr3	18676853	18677345	ACTTGCACCTAAGTC	0	+
chr3	39231599	39232021	AACCATCAGGGAGAT	0	+
chr3	41282792	41283191	CCCACCACTTCAGGC	0	+
chr3	41282799	41283278	GTCGTGGGAGTTTAG	0	+
chr3	41282891	41283315	CTGAGCGTGCGTGGG	0	-
chr3	50262797	50263266	GGCCTCCTACAGGAG	0	-
chr3	58377285	58377763	AACTGCCTCACACGA	0	+
chr3	68522157	68522753	TATTATCTCCGGGTT	0	+
chr3	69572372	69572852	CCACAGTACACTCCA	0	-
chr3	78694883	78695299	TTACCAACCGATCTT	0	-
chr3	88104071	88104570	GACTCCCACACAGAA	0	+
chr3	94224391	94224822	CAGAAGCTCATGTGC	0	-
chr3	94913668	94914120	GCCCACACCCTCACC	0	-
chr3	101926642	101927183	TACGTTTGATAGGAA	0	-
chr3	118586682	118587100	TAGTAACCTCCTTTT	0	-
chr3	134961905	134962348	GGGGGGGTCGGGGTT	0	+
chr3	137759517	137759935	ACCCAAATACGTGGA	0	-
chr3	137759565	137760037	AAAGTGCTCTGTGCA	0	+
chr3	139037587	139038099	AAGCACGGGGCGGTG	0	+
chr3	140379640	140380122	GTAAAGAGCTCCCAC	0	+
chr3	144340765	144341214	ATTAATTCAGTTGGC	0	-
chr3	144340765	144341214	ATTACTTCAGTTGGC	0	-
chr3	148789459	148790028	CCCCTACTGCGACTC	0	+
chr3	152010493	152011088	ACGCCACAACCCGCC	0	+
chr3	152447539	152448099	TCCATCACGTATCGG	0	+
chr3	159346549	159347020	ACTCCCGTACACTTG	0	+
chr4	11141003	11141538	TCCGGATAACTATGT	0	+
chr4	13925838	13926276	TCCCCAAAACTGCTA	0	-
chr4	26896744	26897162	TGTCTTTTAGACGGA	0	-
chr4	33261430	33261858	GGGCCTGGATTGTGG	0	+
chr4	33384290	33384835	ATGTTAGTATCGGAG	0	+
chr4	33384325	33384728	GAAGGCTATCATGCT	0	+
chr4	35068090	35068512	CGTCATCAGCCCACA	0	-
chr4	40619716	40620162	TATCGGGTCAAGGGT	0	+
chr4	46574648	46575168	AAGTGCTCATCCCCC	0	+
chr4	59069569	59070108	TGTCAACAAACCATA	0	+
chr4	61446323	61446874	GCCTGATCCCCGACC	0	+
chr4	62589386	62589926	CTCAGAAGTCGGGAG	0	-
chr4	75842757	75843268	TTCAGGCTCCCACCA	0	-
chr4	85285292	85285967	TCCGAAGCCAGAGAC	0	-
chr4	91605170	91605630	ACATTCCTGCGCCTG	0	+
chr4	107518081	107518674	AAGGTGTCCTGGTTG	0	-
chr4	107875051	107875513	TCGTCTGTAACGCTC	0	+
chr4	109224360	109224870	GCGCATCACCCAAAT	0	+
chr4	114858990	114859427	TCTCCTACGCTATAG	0	-
chr4	123279688	123280253	GACTTGGAATACACT	0	+
chr4	126711601	126712039	CACACAGAAGGTCCG	0	-
chr4	127561644	127562063	TTTCGCACTACTCGG	0	+
chr4	130484101	130484746	ATCTAGTATACATCG	0	+
chr4	131015205	131015741	GTGCTCGAATAACAG	0	+
chr4	131015365	131016010	CTAACTCCCGCCCCC	0	+
chr4	137915361	137915849	CTCACCTCGACAGAT	0	+
chr4	140925044	140925537	TATTATTTAATATTA	0	-
chr4	142012397	142012892	GGCACGTACTGTAGT	0	+
chr4	142227089	142227595	TCATTCCGGTACTGT	0	+
chr4	142227096	142227490	GCCACAGCACGCAAA	0	-
chr4	142227102	142227639	ACGGGAGTGGGTTCT	0	+
chr4	144484426	144484912	ACTTAATAGCAACCA	0	-
chr4	148043284	148043755	CTATGCCATGGTCAA	0	-
chr4	152428958	152429364	GCCCACAGAAATTA	0	-
chr4	154017459	154018052	GACCACAACTTAAAA	0	+
chr4	154017499	154017917	AGAAATAGGAAAAGG	0	-
chr4	154017521	154018039	CGCTAATGTATGTCA	0	+
chr4	154017538	154017942	CTAGAAACAGGTGGT	0	+
chr4	154017591	154018060	CGAATCTAATCTCCA	0	-
chr5	3469220	3469789	TGCTCAAACCGCTCA	0	-
chr5	9193290	9193744	CCCCATAGCCAATCT	0	-
chr5	15516733	15517221	GACAACAACTCTCCA	0	+
chr5	15516945	15517460	TCATTGATTATACTG	0	-
chr5	15517095	15517568	CCCCCCGTGCCTCAG	0	-
chr5	19748407	19748876	GACAGCTACAATCCG	0	-
chr5	19884003	19884386	CTGTCGACCGTTACC	0	-
chr5	19884039	19884568	GCGATCTCTAATATA	0	-
chr5	23494523	23494997	GGCAACAATCGAGCT	0	-
chr5	27567343	27567744	TACTACTATTAAAAA	0	-
chr5	28993137	28993747	CTCTCCCTTTCTCCA	0	+
chr5	34654238	34654675	TATCGGATCAGTTTA	0	-
chr5	36964030	36964600	GTTCAATGCACTATT	0	+
chr5	38120540	38120737	ACGCGAATTCCTTAT	0	+
chr5	52262154	52262620	CGGATCAGGTATGCG	0	-
chr5	52347086	52347520	CTCCCCCCGATACCA	0	+
chr5	63352555	63352987	ACGATACGCCCAGCC	0	-
chr5	74572010	74572490	TATTGTTACAACTCG	0	+
chr5	74639996	74640445	GCCATAGCCCATCAA	0	-
chr5	91180372	91180824	ACTCTGAGGCTAACG	0	+
chr5	96082092	96082552	GGGAGGGTCAGCGCG	0	-
chr5	100189706	100190233	AGTTTCACAACGGAA	0	-
chr5	107521091	107521535	CAGCCCCCGCGGCTC	0	+
chr5	111629474	111629931	CAGTCATAGAAAGGG	0	-
chr5	113020902	113021372	CTCACGCAAGGAACA	0	-
chr5	113542442	113543091	TCTCCTTGCTAACCT	0	-
chr5	113698154	113698595	AGGACCGGTATGAAT	0	+
chr5	113698154	113698595	AAACCGTCGGCGTAC	0	+
chr5	113698237	113698726	AAGAAAATATACTCA	0	-
chr5	113698360	113698801	CTGGTGTTCGCATCA	0	-
chr5	113698440	113698897	TGTGCCACTGTCATT	0	-
chr5	114285282	114285662	CCTCCGCTTTCATCA	0	-
chr5	115534502	115535028	AGATGTCTGTTGAAG	0	-
chr5	116649124	116649738	TCCTGACCCCGTCTC	0	-
chr5	116713696	116714186	TGCTCCCCTCAGCGT	0	+
chr5	121728315	121728781	GACACGACGTCAACG	0	+
chr5	123511623	123512186	CCAACTCATAAGTCG	0	-
chr5	124936685	124937174	CACTCCCCCCACCTG	0	-
chr5	126394000	126394539	TCCTTGCACTTTTAT	0	-
chr5	129479068	129479536	CCGTCGACAGCACAG	0	-
chr5	129479068	129479536	CCGTCGACCGCACAG	0	-
chr5	130413737	130414131	TGCCGTTCAGCAGCT	0	+
chr5	131888758	131889211	ATATAGCGTGGATAA	0	+
chr5	131981450	131981863	GCAGACACCGTGAAT	0	+
chr5	136687406	136687908	CTTCGGTACCCCAGT	0	+
chr5	136883165	136883575	GATCCGACTATGGCC	0	-
chr5	140941134	140941590	CATTCCGCCCGGCAC	0	-
chr5	140941134	140941590	TCTCAAGGCCCTCTC	0	-
chr5	140941134	140941590	TGGCCCCGTGCCTCC	0	-
chr5	142469746	142470217	GCACTCGCTTCCGCC	0	-
chr5	143096252	143096740	CTCTTTACTCCATTC	0	-
chr5	143096373	143096949	CGACACATAGAAAAA	0	-
chr5	143096540	143096977	GAAATCTCCTTCCTG	0	-
chr5	143161250	143161755	ACCAAACCTAGTACC	0	-
chr5	145882914	145883346	CCTCCCAACCTTAAC	0	-
chr5	147754209	147754625	CCGAAATCAATGTGG	0	-
chr6	15075380	15075880	CCCGGTCCAACGAAC	0	-
chr6	24567094	24567351	TCTGCCCTCTACCGG	0	-
chr6	35797258	35797688	TCGACCATATAACCG	0	+
chr6	46068334	46068958	GCCCAGCACAAACCA	0	-
chr6	46652103	46652634	ATAGCTTTCAATCAA	0	-
chr6	65211284	65211508	GACTTTAATACATAG	0	+
chr6	66243342	66243848	TTGGGGAAAAGATGG	0	-
chr6	71336591	71336985	CAGATTTCGCCCCAG	0	-
chr6	72399165	72399610	CGCCCGAGAGACGGA	0	+
chr6	72644957	72645514	GCGTTGCCGCCATCA	0	-
chr6	74452921	74453413	TGCCTGGGTAAGTTA	0	-
chr6	75218729	75219125	ACCCCCCGCCATCTT	0	-
chr6	80875295	80875702	TAAGAACAGATGTGC	0	-
chr6	85135056	85135471	ACACATTTATTTCAG	0	-
chr6	86468630	86469027	AGACCAGCTTCGATC	0	+
chr6	94681481	94681920	TCCCACGAATCAGCC	0	+
chr6	94827687	94828210	CAGGGCTAACGCGGA	0	-
chr6	94893254	94893715	TCTAGAAAATTTTTT	0	+
chr6	95103957	95104376	CCGCCGAGGCCGGTC	0	+
chr6	95141766	95142242	ACGCGCTAAGGAGAC	0	-
chr6	98961973	98962456	AGCACGTCAATACTG	0	-
chr6	106436086	106436546	CCCTCTCGACCCCGG	0	+
chr6	116810514	116810994	GACTGGCTCCTAGCC	0	+
chr6	127747493	127747933	CTAGTCATGGGGCTA	0	+
chr6	127747576	127748043	TTCTTTAGCGTACCA	0	+
chr6	127747609	127748025	CAAAGGGCTAAATAT	0	-
chr6	140103184	140103721	CACGATTCAATCAGCC	0	-
chr6	146576552	146576976	GGGGTTTGTGAACAG	0	+
chr7	13373260	13373720	CCGAAACTGGCCCAC	0	+
chr7	17820277	17820631	CATCACATTGGGATT	0	-
chr7	23514354	23514703	GCGACACGCATGTCA	0	-
chr7	27642207	27642605	TTGGCTAGGTCAGGT	0	-
chr7	27724223	27724682	CGGCGTCTGAACAAA	0	+
chr7	30871832	30872228	AGGCCTATGCTATAT	0	+
chr7	34122253	34122783	CGCACAGCTTTTGCA	0	+
chr7	37701047	37701507	ACGGTGGTGGGGGGG	0	+
chr7	37701047	37701507	ACGGTGGTGGGGGG	0	+
chr7	37701047	37701507	ACGGTGGCGGGGGGG	0	+
chr7	38876007	38876448	CCAAGCAGCTGTGAT	0	-
chr7	58262703	58263020	TGCCAAGTCTCACAC	0	+
chr7	61706914	61707338	ACCGATGGGGTAGTG	0	+
chr7	65822101	65822606	ACCTTCCATAACACC	0	-
chr7	67025053	67025553	TACAGCATTCTTCCC	0	+
chr7	76648334	76648874	TCGTCGCACTACCCT	0	+
chr7	88811809	88812360	GTTCCTAGCTCTAGT	0	-
chr7	89797824	89798264	GCCCACGCAGAAACC	0	+
chr7	91001642	91002056	CAGACCTTATGAGTG	0	+
chr7	93368763	93369273	GGCCAGCAGACCGCC	0	+
chr7	104940893	104941416	CTACAACCTACACCC	0	-
chr7	112209507	112210047	ACCGTCTTGTTCTTC	0	-
chr7	112209528	112209966	TCAAGACATACTGCC	0	-
chr7	112209554	112210043	CGGGGCCCATTACCC	0	+
chr7	116019891	116020363	GAATTATCAGTGAAA	0	-
chr7	116019891	116020363	CACAATTTTTATGAT	0	-
chr7	117052312	117052836	TATTCATAAACGTTA	0	-
chr7	125208190	125208734	TTTCCAATTTAGACT	0	-
chr7	128677184	128677659	GCCTTCGGATTTATT	0	+
chr7	131112970	131113512	CCATCACCGGTGCAC	0	-
chr7	134081951	134082410	AAAGGGGTTCTCGCT	0	-
chr7	136417796	136418325	CAGCCCTAAACCGAA	0	+
chr7	145194398	145194866	TGTAACGTTGGGAAG	0	-
chr7	147238571	147239101	CCGTCTATCCAATGT	0	-
chr7	149113290	149113719	GCTGACTATCCAATT	0	+
chr8	26187767	26188201	TTCTGTAGGTGGCCA	0	+
chr8	27424592	27425018	CACCAATTGCGATGT	0	+
chr8	38929623	38930010	GTGAACCTGGTAACC	0	+
chr8	50429166	50429578	GGCTAGGCCACTACC	0	+
chr8	54480219	54480558	GTAATCGATTTTTAA	0	+
chr8	56206617	56207026	CGTAGTTGGGGGATA	0	+
chr8	62336503	62336904	TCTGGGCGCAACCTA	0	-
chr8	71351881	71352294	CACGACCATTAATTC	0	+
chr8	73404453	73404926	AGCTAACATTGCGCG	0	+
chr8	76811606	76812011	ACCCCCTCTCATAGC	0	-
chr8	86546538	86546952	TCGCGCTCAGTAAGT	0	-
chr8	87666597	87667142	GTGCACCTATCCAAG	0	-
chr8	92439077	92439513	CTCTCCCGCCCCATC	0	-
chr8	95564434	95564921	GACCTAGCAGACTGG	0	+
chr8	95564479	95564996	ACCCATCCACCGAAC	0	+
chr8	95564507	95564934	GATTCTGGCTTTGTG	0	-
chr8	95564552	95565118	TACACCGGAAATCGG	0	-
chr8	95564586	95564988	CCGAAAGCTCAAGGA	0	-
chr8	95564588	95565006	TTGAGACGTGGTTTT	0	+
chr8	95564602	95565118	CTCACATGCACCCCG	0	-
chr8	95564602	95565118	GCAGCACAAGGCACT	0	-
chr8	95564612	95565118	CCATCACCCTGCTAG	0	-
chr8	95564625	95564916	AACATGGATATAACA	0	-
chr8	95564639	95564866	GGTGACGCCCAGTTT	0	-
chr8	95564668	95565120	TGGTCGACCTCGTTC	0	+
chr8	95564673	95565077	GCGTATATGGACGCG	0	-
chr8	105507581	105508042	TCAGACGAAACTGGA	0	-
chr8	114649845	114650321	ACCTAATAATGACAA	0	-
chr8	114801594	114802085	CCCGAGTGCCCCACT	0	-
chr8	118300131	118300582	AACCGGCCACCTCTA	0	+
chr8	118906786	118907264	ACGCCATACCTCCAA	0	-
chr8	119786778	119787200	AGGCAGTTTTCTATT	0	+
chr8	123088854	123089251	CAGAAAAATTCAAAA	0	+
chr9	3024411	3025247	AGGTAAAGCTAAGCT	0	+
chr9	3025715	3025956	ACCCGCGCGGACCGT	0	-
chr9	7245508	7245935	GAACATAGACTCTAC	0	+
chr9	18537192	18537758	TTCAAAAACGAACCG	0	-
chr9	20661267	20661737	CTCCTCCGGCCCTCA	0	+
chr9	21323348	21323779	GTCGCGCCCGCCCTC	0	-
chr9	32669050	32669478	CAAAACGTTCATGTT	0	-
chr9	34703304	34703769	CCACCGGCAACCTCT	0	+
chr9	34703376	34703779	TGGCAGCAGGGCGTTA	0	+
chr9	35806452	35806887	CCTGCCACTGTTAGC	0	-
chr9	38023419	38023906	GTATCGATAGTACAT	0	-
chr9	43292335	43292851	TAGGGTAGTGCTCGT	0	-
chr9	43835053	43835503	AACTCACTTCAGGGT	0	-
chr9	45193917	45194503	GAGACGGACTTGCCG	0	+
chr9	45937696	45938140	ACTCACCGGGTGCCT	0	-
chr9	50064640	50065131	CAACTCCCACGCTGC	0	+
chr9	52350301	52350795	ACCTCAACACAGCGG	0	+
chr9	62262723	62263248	TACAGTATAAAGTTA	0	+
chr9	62910808	62911324	TCCTCCACCCTGTCC	0	-
chr9	64519850	64520361	TCAAGGGAGATTCGA	0	+
chr9	70910846	70911284	AGAGCATATTAGGCA	0	-
chr9	82658883	82659304	CTCGCATATATCCTC	0	-
chr9	90318101	90318630	ATGTGCAGCGACCTG	0	-
chr9	93517161	93517646	GACAGCTTTGGTAAA	0	+
chr9	107872431	107872946	GTCTTGGGGGTGAGC	0	+
chr9	111874518	111875015	GCCTTCCCCGCACCC	0	-
chr9	115845436	115845969	GACATTCCATTGTTG	0	-
chr9	118051137	118051562	CCCACCAATCGACCT	0	+
chr9	121531720	121532203	CCTACTGTGATGATA	0	+
chr9	122254608	122255082	TATATTTCAAACGTA	0	-
chrM	4043	4621	CCAACTGATTACTAT	0	+
chrM	5323	5808	AATGGGCCCCGTCGC	0	+
chrM	5738	6207	AAAGGTGAGCACCCC	0	-
chrM	13808	14324	GCCGGACGCATCCGG	0	-
chrUn_random	724479	724986	TGATAGACTCGGCCC	0	+
chrUn_random	5496106	5496543	CACAGGCCACCCATC	0	+
chrX	6233027	6233402	GCACGGGGGACCCGA	0	-
chrX	7811088	7811518	ACGTCAGTGCAATTC	0	+
chrX	8429346	8429892	CGGTGTCGTGAGACA	0	-
chrX	19988330	19988729	GCTCACGCTGACTAG	0	-
chrX	19988330	19988729	CAATACGTTGTATGT	0	+
chrX	32927454	32927931	CAAGCGGTACTGCGC	0	+
chrX	33417896	33418373	ACCCTGATTCCCACC	0	+
chrX	45439475	45439983	GGCGCCACAAGCGCA	0	+
chrX	45465737	45466218	CCCCACCATATCAAT	0	+
chrX	75050565	75051174	CAAGTTTGTTTACCC	0	-
chrX	82939166	82939559	AGATGCTGTTTCATA	0	+
chrX	83253544	83254009	GTACTACGCAGTATT	0	-
chrX	87414801	87415287	GCCCCTCATAACAAA	0	-
chrX	92525491	92526035	ACAACATGACTAATT	0	+
chrX	97577583	97578016	ATCCGTGCGACGATT	0	+
chrX	102101767	102102148	CAGATACGCCGCCTT	0	-
chrX	102260841	102261246	CTCGGAGCACCACGC	0	+
chrX	112193642	112194077	ACGGCCCGGCTACCC	0	+
chrX	125481912	125482444	GCCTGCGCTTCAAAT	0	+
chrX	129778499	129778997	ACTCCGACACTCAGT	0	-
chrX	129806036	129806507	CATAGACCAGAATAC	0	+
chrX	132068366	132068786	TCGCCCGTGACGTTC	0	+
chrX	132681644	132682081	CCACAATCGCGTGCT	0	-
chrX	134006650	134007000	ACTACGGACTACGAA	0	+
chrX	147576438	147576862	CACGCTAGCTATCGT	0	+
chrX	153206543	153207113	ATTCTAGATCGCGTA	0	+
chrX	161634921	161635387	GAATAAAGGAGCGTT	0	+
chrX	161634938	161635365	CCTTCAAGACCATTT	0	-
chrX	161634985	161635371	CATGATGCTCGCCGG	0	-
chrX	162855101	162855584	TTCCTGCACGGAATC	0	+
chrX	163655955	163656532	GACCCCCAGGCGCTG	0	+
chrY_random	2134786	2135378	GTTCAAGTTCGACTC	0	-
chrY_random	6900136	6900603	ACTAACGAGAAGAAC	0	+
chrY_random	11177079	11177565	CAATGATAACCCCAC	0	-
chrY_random	33027184	33027515	CGCTTCCCATACTGC	0	-
chrY_random	34065126	34065524	TGACCCGCTCGGTTA	0	+
chrY_random	35647503	35647919	AGGTCCCTGGGTGCC	0	+
chrY_random	35686492	35686953	ACGAAGAGAGCTTTC	0	+
chrY_random	42617665	42618157	AAACGCCACTATCTG	0	-
chrY_random	42716499	42716978	TGTCATGTCGGATCC	0	-
chrY_random	53721495	53721956	TTAGGTGCTAATTCT	0	+

## Sheet: HiSeq_cortex_1
track name="HiSeq_cortex_1" description="Cortex_replicate_1" useScore=1 visibility=squish
chr3	37709504	37710146	AAAAAAAAATCAATC	940.274
chr10	70805960	70806410	AAAAAAACCTACAAT	710.24
chr12	100673230	100673624	AAAAAAAGCACTTTT	584.448
chr5	54341379	54341917	AAAAAAAGGACACAT	2.56618
chr15	82784225	82784760	AAAAAAATCAATCGT	2.56618
chr18	64510206	64510708	AAAAAACATTATGTC	982.728
chr15	79640287	79640806	AAAAAACGTGTAAAT	505.265
chr3	14863875	14864271	AAAAAAGAGCACCAT	2.56618
chr9	29997583	29998082	AAAAAAGCCTGCTAT	581.977
chr9	96341942	96342530	AAAAAAGCTAAATAC	2.56618
chr15	31265244	31265740	AAAAAAGGTGATGAT	807.228
chr17	25589196	25589730	AAAAAAGTCACATG	2.56618
chr19	23560733	23561238	AAAAAAGTCTCAGTA	953.849
chr1	179538829	179539288	AAAAAAGTGGACACC	2.56618
chr2	124348189	124348615	AAAAAATAAGCCGCT	787.407
chr8	128123918	128124528	AAAAACACAGCTATT	596.266
chr17	24340777	24341209	AAAAACAGGCAGGA	2.56618
chr5	119787581	119788007	AAAAACATAGCTCAA	902.714
chr2	5594942	5595333	AAAAACATGTCTGGA	590.961
chr11	89861773	89862301	AAAAACATTCAACCA	815.691
chr3	107507443	107508036	AAAAACCAAGTTTAC	2.56618
chr8	18890630	18891215	AAAAACCTCCCCGTC	536.838
chr1	80400513	80400914	AAAAACGCCATGGAC	2.56618
chr10	87129460	87129996	AAAAACGCTCTGACA	858.472
chr4	128076181	128076650	AAAAACGCTTGACAG	829.227
chr2	90663915	90664412	AAAAACTAGTTGTGG	852.343
chr1	196404185	196404588	AAAAAGATATAAGTG	925.524
chr2	50148879	50149344	AAAAAGCAAATGGGT	2.56618
chr10	13216063	13216413	AAAAAGCCTTTTGA	692.49
chr9	30090618	30091219	AAAAAGCGTCCTAAA	2.56618
chr8	107990539	107991020	AAAAAGGGTAGGTGG	473.123
chr15	34264859	34265391	AAAAAGGTATCTTGT	448.415
chr4	57124959	57125238	AAAAAGGTGATTACC	931.165
chr4	53426555	53427169	AAAAAGTGCCTGACG	531.991
chr2	180435932	180436377	AAAAATAAGCCAGTC	455.717
chr5	44588971	44589382	AAAAATAGCCACATG	2.56618
chr7	149317651	149318112	AAAAATAGTGGTGAG	534.442
chr6	86725670	86726148	AAAAATCATATGAAA	861.519
chr5	146832553	146832996	AAAAATGATTTGACC	888.033
chr13	46508876	46509322	AAAAATGCTCACGCT	846.09
chr8	67100721	67101200	AAAAATGGCTGCTAG	754.256
chr2	103212651	103213172	AAAAATTTGTAAGC	1066.46
chr19	30261678	30262110	AAAACAACCGCTAGA	386.964
chr6	115188645	115189032	AAAACAACGATCAAT	2.56618
chr5	22717999	22718391	AAAACAAGGAAGCGT	2.56618
chr16	96339673	96340069	AAAACACTTCTTTAC	2.56618
chr13	100180312	100180779	AAAACAGCGCCTAGA	2.56618
chr11	83375796	83376275	AAAACAGCTCGAACC	752.094
chr4	47657977	47658539	AAAACAGGCTCGATT	835.43
chr2	5526811	5527266	AAAACATAGGAACCC	2.56618
chr14	106152244	106152780	AAAACATCACCCCAT	428.613
chr2	131770869	131771394	AAAACCAGGTCATCC	867.831
chr4	148252786	148253432	AAAACCATTCCTGCG	2.56618
chr11	113517798	113518181	AAAACCCAACCACAC	2.56618
chr17	84392136	84392614	AAAACCCAGATACAC	362.891
chr12	36819654	36820106	AAAACCCAGTGTGCC	895.621
chr6	49270968	49271487	AAAACCCTATGCCGT	2.56618
chr5	25042646	25043226	AAAACCGATCTGTGT	784.151
chr11	6852712	6853229	AAAACCTAAGTGTGA	875.579
chr6	115884014	115884489	AAAACCTATTGACCT	930.976
chr3	115315736	115316216	AAAACGAAATACACA	670.003
chr3	37450217	37450604	AAAACGACACCAGAA	2.56618
chr1	76547359	76547963	AAAACGACCGATCAT	2.56618
chr13	9074816	9075251	AAAACGACTATGGAA	852.081
chr14	62906204	62906666	AAAACGAGATTAAAT	877.796
chr8	42239095	42239570	AAAACGCGATTGCAT	2.56618
chr4	94405540	94406010	AAAACGGCCACAGAC	442.364
chr6	117963531	117963974	AAAACGGGCGTTAAT	899.598
chr1	107805300	107805640	AAAACGGGCTGTGGA	521.567
chr13	35107845	35108265	AAAACGTCCGGGTCT	2.56618
chr8	26532037	26532464	AAAACTATACCTCCA	869.212
chr11	5326406	5326792	AAAACTATGCCGCGT	2.56618
chr1	83491578	83492092	AAAACTATGTAAGGG	903.464
chr6	119130115	119130537	AAAACTATTCTTACG	760.72
chr14	35448879	35449266	AAAACTCTTCATACT	2.56618
chr13	112646383	112646840	AAAACTGTGCAGGCT	2.56618
chr11	33236653	33237078	AAAACTGTTGATCGT	2.56618
chr15	82473280	82473728	AAAACTTCCCCCGGG	796.451
chr8	128558968	128559429	AAAACTTTTCAATCG	657.587
chr17	16011372	16011787	AAAAGAAATCTAGCT	755.582
chr13	94459478	94459895	AAAAGAACAAGGTAG	851.079
chr13	44548586	44549031	AAAAGAACCACACA	2.56618
chr14	121651772	121652130	AAAAGAAGGATGTGA	871.765
chr2	156111158	156111571	AAAAGAATAAGGGAT	2.56618
chr4	90905448	90905890	AAAAGACACACCGAT	793.481
chr12	26876555	26877012	AAAAGACGAATCACC	787.648
chr19	8479911	8480331	AAAAGACGGGAAGTG	879.228
chr15	66844912	66845347	AAAAGACGTAATTTC	740.99
chr8	60017318	60017757	AAAAGAGATTTCCTG	907.212
chr11	116995411	116995865	AAAAGAGTGCTATCG	752.111
chr5	24561055	24561576	AAAAGATAACTACGG	2.56618
chr10	13768319	13768788	AAAAGATCCGCTGAG	2.56618
chr8	95349550	95350052	AAAAGATGGAAGTCT	750.734
chr4	141827459	141827905	AAAAGATTATACGAA	724.967
chr5	140580782	140581184	AAAAGCAAGCTGAGC	350.629
chr5	131177800	131178185	AAAAGCGGACGTTGG	774.637
chr6	72176890	72177352	AAAAGCTCGAGATCA	2.56618
chr5	146832582	146833062	AAAAGCTGCTTGTGC	875.746
chr15	102998037	102998455	AAAAGGAGACAGCTA	2.56618
chr14	70365109	70365587	AAAAGGCCAGAGTCC	524.82
chr15	86305394	86305882	AAAAGGCCTACTCGA	768.423
chr2	35730166	35730758	AAAAGGCGGCTCTCC	607.079
chr19	30261776	30262236	AAAAGGGACTATGTG	666.88
chr14	61594490	61594936	AAAAGGGGGCCCCGG	789.606
chr11	61282111	61282519	AAAAGGTAGTTTCAT	2.56618
chr7	54169809	54170214	AAAAGTACACACCTG	1008.91
chr8	120191299	120191729	AAAAGTGTACGATAC	2.56618
chr5	150185205	150185619	AAAAGTTCATCCCCA	2.56618
chr10	38525938	38526333	AAAAGTTCTCGGTT	2.56618
chr6	137661712	137662316	AAAAGTTGAGCTCAT	439.802
chr1	94926058	94926707	AAAAGTTGCCCTTGG	2.56618
chr2	104422999	104423536	AAAAGTTGCGTTTCG	2.56618
chr5	73034857	73035343	AAAATAAAACCTTCT	2.56618
chr5	146832561	146832967	AAAATAAAGGCTAAA	2.56618
chr14	34847189	34847791	AAAATAAGGATTCTC	893.405
chr13	44309618	44310079	AAAATACGAAGGCCT	612.153
chr2	153789107	153789451	AAAATAGATATTTGG	838.806
chr13	32772006	32772387	AAAATAGTCAATAC	2.56618
chr13	95289363	95289923	AAAATATCAGGGTAT	593.411
chr3	103452249	103452711	AAAATCACGAGAGTG	754.665
chr18	51290231	51290672	AAAATCACTGACCGA	2.56618
chr1	136674554	136674971	AAAATCACTGATTCT	814.063
chr11	51571053	51571527	AAAATCATTTCATCG	688.562
chr19	27396635	27397153	AAAATCCAACGCGTA	2.56618
chr3	19544121	19544598	AAAATCCCAGCCCCC	2.56618
chr10	53595658	53596144	AAAATCCCCCTTACA	836.688
chr17	12571172	12571619	AAAATCCGTTTGATT	2.56618
chr15	95599088	95599648	AAAATCGCAGATGAG	595.529
chr9	56777438	56777870	AAAATCTCAGGGTTC	2.56618
chr12	99545699	99546162	AAAATCTGCTCATGG	792.011
chr1	94925856	94926448	AAAATGCATCCGGTA	678.324
chr10	118236761	118237188	AAAATGGGTTTTTCA	789.894
chr16	26706385	26706963	AAAATGGTTATGAAC	2.56618
chr13	69776918	69777438	AAAATGTTGCTAAGA	2.56618
chr13	120128390	120128868	AAAATTAAAAACACG	2.56618
chr9	32778857	32779346	AAAATTAAGCCGAAA	947.062
chr18	46766943	46767453	AAAATTAGTGGAAGT	2.56618
chr6	49270038	49270475	AAAATTCTAGTTTGA	2.56618
chr1	76100792	76101132	AAAATTGATCATTAG	712.604
chr1	177361537	177361966	AAAATTGCCTCACTC	2.56618
chr5	39610866	39611369	AAAATTGGATATCGG	2.56618
chr14	121651518	121652081	AAAATTTCGGCCTTG	2.56618
chr1	166182577	166183024	AAAATTTGATAGGCT	2.56618
chr4	15523342	15523890	AAAATTTGCGCTATC	632.077
chr6	112748207	112748721	AAAATTTGTACCACC	841.157
chr7	53799914	53800360	AAACAAAATAGCACA	653.424
chr4	98321140	98321668	AAACAAACAGCTCTA	2.56618
chr8	129332405	129332854	AAACAAACCATCATT	2.56618
chr5	77610516	77610981	AAACAAAGATGTTAG	2.56618
chr16	45768266	45768600	AAACAACAATTTATG	731.028
chr11	7052295	7052756	AAACAACCGTGCTAA	2.56618
chr16	96346416	96346798	AAACAACTGCCTATG	715.478
chr8	23576349	23576739	AAACAAGCATTCACG	2.56618
chr11	7092756	7093162	AAACAAGCGTTTTGT	2.56618
chr13	97512835	97513205	AAACAAGTAAGGATG	604.211
chr17	32827980	32828367	AAACAATAACAACGT	754.974
chr16	67124899	67125318	AAACAATCTCGCCCC	2.56618
chr9	105372491	105372982	AAACAATCTGTCTTA	694.001
chr15	52931053	52931530	AAACACAACTGAGCC	393.585
chr13	13580007	13580391	AAACACACGCCCAGA	2.56618
chr18	64485413	64485870	AAACACATACTTTCG	2.56618
chr19	23037001	23037580	AAACACATTCCGATC	527.834
chr15	85008272	85008879	AAACACCGCGCTCGG	2.56618
chr7	53799753	53800225	AAACACCTGGGGTCT	690.866
chr9	110364874	110365435	AAACACGCACCAACT	602.998
chr1	107805150	107805622	AAACACGCCGATATT	2.56618
chr1	41616092	41616559	AAACACGTCATTCCT	549.979
chr5	38613873	38614258	AAACACTGGGTAGCC	2.56618
chr4	132782044	132782550	AAACAGACACCGACA	2.56618
chr10	56834401	56834867	AAACAGACTTACGGC	855.036
chr17	84235488	84235972	AAACAGAGACTTGGT	2.56618
chr10	98818749	98819299	AAACAGATACATCCT	792.697
chr3	37450559	37450955	AAACAGCATCTCATA	948.233
chr4	104943923	104944431	AAACAGCCGACTACC	2.56618
chr2	43324833	43325314	AAACAGCCGATGACT	437.466
chr3	14864146	14864537	AAACAGCTGCTTAAA	970.166
chr9	65993792	65994304	AAACAGGCCTACTTT	474.483
chr11	35118821	35119189	AAACAGGGCTATAAA	2.56618
chr10	19738214	19738610	AAACAGTCGACCGAT	626.6
chr13	51267879	51268304	AAACAGTTTCTTCAC	734.52
chr9	102178375	102178791	AAACATACTTTTTTT	782.783
chr17	16011364	16012015	AAACATAGACAAGTT	2.56618
chr7	26429490	26429948	AAACATCACCGTCAA	823.379
chr17	85131771	85132166	AAACATCCTGGTCTA	687.854
chr6	112748651	112749037	AAACATCGCTAAATG	2.56618
chr17	28575117	28575603	AAACATCTACCCGAT	2.56618
chr14	47811609	47812114	AAACATCTGCACACA	2.56618
chr2	4956375	4956739	AAACATGAATTGTCT	2.56618
chr11	85835866	85836286	AAACATGCCTTGGGT	729.821
chr11	22645402	22645869	AAACATTACCAGATC	854.695
chr4	117544025	117544456	AAACATTAGAATGGT	2.56618
chr6	72098711	72099127	AAACATTTGCCTCTT	903.16
chr3	131015144	131015536	AAACCAACATCACCA	2.56618
chr2	146085427	146085852	AAACCAAGACGTCCT	884.106
chr2	181313408	181313820	AAACCACCTTATTCA	2.56618
chr3	130973306	130973687	AAACCACTAAAGCTC	903.199
chr11	6799171	6799726	AAACCAGCCTCGCAT	786.026
chr1	90150105	90150609	AAACCAGTCGGGTTC	786.178
chr6	145200385	145200906	AAACCATACTCAACT	894.152
chr3	102474007	102474456	AAACCCAACCTGTAA	785.825
chr2	26175014	26175416	AAACCCAACTGAAGT	2.56618
chr8	109358843	109359419	AAACCCACGGGAGGC	2.56618
chr18	39550458	39550826	AAACCCAGAGTCATC	863.524
chr8	125378888	125379418	AAACCCAGGTCGGTT	500.431
chr11	94899839	94900337	AAACCCAGTGCTCGT	2.56618
chr11	63691779	63692337	AAACCCCAGCAGCCG	2.56618
chr2	156452323	156452725	AAACCCCCACTTATC	871.027
chr11	94899947	94900270	AAACCCCCTCCCTGC	653.888
chr8	107569843	107570329	AAACCCCGAATACTT	854.788
chr5	39610990	39611460	AAACCCCGAGCAGCC	2.56618
chr18	45730281	45730679	AAACCCCTCTCTAAG	2.56618
chr13	12221171	12221611	AAACCCCTGGCCCCA	577.019
chr10	74997455	74997915	AAACCCCTTGTGATG	778.701
chr19	23099052	23099488	AAACCCGAATAGAGA	2.56618
chr15	12679578	12680068	AAACCCTCAAAGCGA	809.826
chr18	12961176	12961680	AAACCCTCACCGAGC	890.537
chr1	132598614	132599081	AAACCGAAGCCCGTG	856.733
chr5	31947413	31947820	AAACCGCCCTTAAG	2.56618
chr4	155064910	155065310	AAACCGCCGACAATG	330.547
chr8	128558867	128559294	AAACCGCGTTGTGCA	2.56618
chr2	103687155	103687621	AAACCGGCAGATAGA	859.519
chr1	182437608	182438074	AAACCTACCGGGCGA	801.261
chr18	16915810	16916238	AAACCTACGTTCTAG	2.56618
chr9	24700763	24701260	AAACCTAGAACTCCT	2.56618
chr4	47657915	47658425	AAACCTCCATAGCCA	2.56618
chr12	80316924	80317408	AAACCTCGTGCTGCA	615.451
chr17	84292350	84292896	AAACCTGAATCTAAC	526.484
chr11	16642483	16642991	AAACCTGAGTTAGAC	713.638
chr6	30122840	30123306	AAACCTTCGCTTACC	680.342
chr9	61677009	61677571	AAACGAACAAAGCT	2.56618
chr6	18589902	18590293	AAACGAACACCTCGA	2.56618
chr9	75275188	75275575	AAACGAAGTTTCAGG	2.56618
chr4	107692029	107692555	AAACGAATTACCCCT	2.56618
chr8	67100393	67100839	AAACGACCAGAGGTT	2.56618
chr7	74232432	74232837	AAACGAGAGCATCGT	654.176
chr3	107506994	107507432	AAACGAGAGTAAATG	2.56618
chr15	30824823	30825456	AAACGATCGATATTC	948.064
chr2	65496726	65497198	AAACGCACCAAATGC	2.56618
chr5	65731033	65731542	AAACGCAGGCCCAGA	2.56618
chr15	82473180	82473555	AAACGCCCACAATAC	2.56618
chr3	59857923	59858385	AAACGCCCACGTAAT	2.56618
chr13	34721258	34721791	AAACGCCCACGTTCT	2.56618
chr1	48790451	48790769	AAACGCCCCTAACAG	2.56618
chr9	13402141	13402600	AAACGCCCTGACCAC	878.909
chr11	19501347	19501735	AAACGCCGGGGAGTT	383.026
chr13	104144524	104145144	AAACGCGAATTAGAG	2.56618
chr18	32077981	32078457	AAACGCGATTTTTAG	601.056
chr17	86902466	86902873	AAACGCGGAATCGAT	2.56618
chr2	14783872	14784315	AAACGCGTAAGAAAC	710.993
chr11	89962508	89962958	AAACGCTACGAAATG	836.251
chr18	69826418	69826847	AAACGCTCACATGCT	2.56618
chr5	34612070	34612658	AAACGCTGCCGGGGG	637.499
chr19	53864209	53864619	AAACGCTTGCACTAG	563.823
chr5	30474712	30475090	AAACGGAAACGGCAT	2.56618
chr14	102314876	102315258	AAACGGAGGCTTGAC	2.56618
chr2	159533826	159534294	AAACGGCTCTAGCGA	2.56618
chr13	34057795	34058144	AAACGGGTTTTACAT	438.128
chr13	34721620	34722159	AAACGGGTTTTAGCA	566.759
chr4	98320951	98321459	AAACGGTACACTCGG	519.405
chr13	59659054	59659549	AAACGGTCGACACCC	2.56618
chr8	41754727	41755168	AAACGGTTAGTGGCA	2.56618
chr1	194211371	194211918	AAACGTACCACAAGC	621.545
chr6	137661746	137662246	AAACGTAGCTGGACT	507.424
chr10	90062512	90062938	AAACGTAGGGCGTGG	760.618
chr2	77528527	77528910	AAACGTAGTGGTGGC	684.153
chr2	145873368	145873723	AAACGTCAACAACAC	2.56618
chr16	8597690	8598059	AAACGTGTCCCCCAC	2.56618
chr7	112748345	112748837	AAACGTTATTGCCGG	2.56618
chr12	87988903	87989449	AAACTAAATTCATCT	939.708
chr8	14850342	14850790	AAACTAACCAAGTCG	2.56618
chr6	85799016	85799444	AAACTAATTCATGAT	913.839
chr8	42220160	42220676	AAACTAATTCTACCA	926.867
chr10	123283728	123284171	AAACTACATCCCGGC	830.095
chr4	99903490	99903941	AAACTACCACATACA	2.56618
chr5	89119669	89120238	AAACTACCACTTAGC	812.535
chr4	147478098	147478572	AAACTACGATCACTC	375.79
chr11	51571006	51571564	AAACTACGCAGCCAA	2.56618
chr13	37717840	37718247	AAACTATATAGGACC	391.183
chr1	177361348	177361760	AAACTCACACTACAT	749.117
chr2	119884695	119885163	AAACTCACGCGTAAA	2.56618
chr12	103448849	103449267	AAACTCAGCATCGAT	756.216
chr12	77532386	77532840	AAACTCAGGGAGTTA	577.019
chr6	72064761	72065374	AAACTCATAGCGTCC	931.307
chrX	7184034	7184522	AAACTCCGCTATCAT	853.738
chr1	74768255	74768708	AAACTCCGGGTTCAC	826.903
chr15	88934954	88935527	AAACTCGGATCCTCC	715.15
chr3	81230674	81231042	AAACTCGTGCCACAT	184.497
chr18	43020524	43021067	AAACTCGTTGTCGCG	599.717
chr17	45745119	45745479	AAACTCTATAAGTAC	930.668
chr4	154868858	154869247	AAACTCTCCATGGGC	2.56618
chr13	43229787	43230283	AAACTGAACGAAACA	938.822
chr5	38613922	38614302	AAACTGAGCGTGTTA	393.046
chr13	44309617	44310058	AAACTGCGGCTCCCA	2.56618
chr14	12695635	12696173	AAACTGGTAACCAAT	950.01
chr18	24872220	24872871	AAACTGGTCACGGAC	617.002
chr8	11292459	11292934	AAACTTAAGAGGTTG	740.705
chr1	34186682	34187229	AAACTTACACAAGAG	735.267
chr9	33741703	33742183	AAACTTCAGCCCGCT	2.56618
chr15	51195118	51195518	AAACTTCGGGCACCA	617.176
chr13	95289005	95289451	AAACTTCTACAACTA	2.56618
chr1	95024902	95025319	AAAGAAACAGTGCCT	737.58
chr11	117284610	117284954	AAAGAAACCCAAATA	2.56618
chr6	115416563	115416943	AAAGAAACGGCTTTC	2.56618
chr2	143899837	143900348	AAAGAAATTACTACC	2.56618
chr8	67137691	67138241	AAAGAACTCCCCCCG	436.89
chr19	14333552	14333898	AAAGAACTCTCACAC	625.616
chr16	49896139	49896569	AAAGAACTGTATATG	741.12
chr11	35788306	35788722	AAAGAAGCGGATCTT	629.706
chr5	138517453	138517833	AAAGAAGGCCGATCA	2.56618
chr17	25589612	25590132	AAAGAAGTCCGGAAC	2.56618
chr11	109783613	109784026	AAAGAATCAATACCT	2.56618
chr12	74918043	74918561	AAAGACACGTGCGCA	2.56618
chr14	70938404	70938823	AAAGACATGTACTAG	802.584
chr5	31126315	31126863	AAAGACCGCGATACG	747.101
chr4	114206374	114206797	AAAGACCTACTGTCC	526.484
chr13	92998165	92998738	AAAGACGGAGTGCGT	401.339
chr9	98180629	98181085	AAAGACGTGTCGGAA	684.486
chr1	90109630	90110007	AAAGACTGTAAAAAG	2.56618
chr2	90663918	90664430	AAAGAGACATGACCC	2.56618
chr16	57863113	57863578	AAAGAGCATGAGGCA	923.236
chr11	65057021	65057506	AAAGAGGCGAATTAA	851.466
chr4	33880305	33880758	AAAGAGGTCCTATTC	667.199
chr5	150185177	150185547	AAAGAGTCCATAAGA	2.56618
chr14	47235860	47236406	AAAGAGTGAATAAGC	2.56618
chr4	33976978	33977379	AAAGAGTGTGATAAT	2.56618
chr10	86514172	86514776	AAAGATAACACATTG	2.56618
chr7	56034528	56034959	AAAGATACTCTGCAG	863.187
chr14	12695553	12695969	AAAGATAGATAGAGG	2.56618
chr11	80051946	80052337	AAAGATATTTGGTAT	2.56618
chr7	151735955	151736408	AAAGATCTGAGACCA	577.019
chr17	85137696	85138131	AAAGATGCATTGGTT	2.56618
chr3	10127558	10128002	AAAGATTCCAAAATT	2.56618
chr5	118492834	118493413	AAAGATTGAACCAGG	905.549
chr4	131554367	131554956	AAAGATTGGTAACGG	2.56618
chr4	148929135	148929504	AAAGCAAACATCTCT	2.56618
chr13	46509049	46509417	AAAGCAACCAGTCTC	662.258
chr13	56651754	56652296	AAAGCAACCATGCTG	504.717
chr8	26415887	26416284	AAAGCAACGGGCCCG	2.56618
chr1	136463940	136464402	AAAGCAATCTCTACT	2.56618
chr5	34611930	34612382	AAAGCACATATACTT	732.16
chr16	23996304	23996795	AAAGCACCCTCAGAA	770.635
chr5	37284691	37285132	AAAGCAGAAACCTTA	2.56618
chr17	25589350	25589839	AAAGCAGACTAGCGA	787.111
chr18	45730114	45730604	AAAGCAGCCGTAGCG	722.324
chr11	29513347	29513836	AAAGCATACGTGCAT	589.811
chr5	112913971	112914378	AAAGCATATGTAGCG	754.279
chr15	80109120	80109539	AAAGCATATGTTATT	554.451
chr7	106883171	106883721	AAAGCATCCTTCCTC	861.172
chr15	12679603	12680176	AAAGCATCGCTCAGC	2.56618
chr14	103867835	103868303	AAAGCATCGTTCGAG	870.967
chr15	45285505	45285882	AAAGCATGAGAAACC	853.678
chr7	56034186	56034759	AAAGCATGCTTAAGT	400.855
chr18	64911135	64911524	AAAGCCAATTCTTTT	901.345
chr11	98447177	98447709	AAAGCCATCTGTGGA	530.588
chr9	25136573	25137059	AAAGCCCCGAAACAA	2.56618
chr6	145293241	145293700	AAAGCCCGAGAATGA	2.56618
chr14	64611057	64611614	AAAGCCCGATCGCAC	2.56618
chr6	71475586	71475943	AAAGCCCTCGAAGAT	660.834
chr11	94250236	94250744	AAAGCCGCTACAAGG	2.56618
chr6	91584911	91585334	AAAGCCTAGCCTCCT	2.56618
chr11	111741300	111741739	AAAGCCTATTCCCCA	903.464
chr16	76787092	76787496	AAAGCCTGGTAGTGC	2.56618
chr5	150185260	150185729	AAAGCCTTAATCACC	2.56618
chr9	67396686	67397151	AAAGCCTTATGTTTA	934.446
chr1	136674594	136675060	AAAGCGAACGCGTTT	740.432
chr14	64612443	64612778	AAAGCGACACAATTA	1028.17
chr12	90941279	90941700	AAAGCGACGAAAGGG	2.56618
chr1	132575037	132575481	AAAGCGCACGGGGGT	2.56618
chr13	15390174	15390630	AAAGCGGGCTCTGAG	449.058
chr2	119884618	119885106	AAAGCGGTCTACCAT	376.188
chr3	33888169	33888592	AAAGCGTCATACTTC	599.275
chr18	44715508	44715942	AAAGCTACGGATTGA	2.56618
chr14	41909438	41909970	AAAGCTAGCATAAAC	770.444
chr1	72447174	72447627	AAAGCTCAGATAGAC	699.358
chr16	28402662	28403124	AAAGCTTAAGCTACT	2.56618
chr18	69280985	69281372	AAAGCTTCCTCCCTC	513.846
chr7	74232567	74233154	AAAGGAAAACAGACT	723.572
chr11	51581886	51582291	AAAGGACTCAAGTGG	831.608
chr2	129628371	129628797	AAAGGAGCGACTCTC	2.56618
chr6	107949380	107949891	AAAGGCAACAAGATT	355.702
chr13	95289261	95289782	AAAGGCCACACAGTT	2.56618
chr12	56498359	56498847	AAAGGCCCATTTTTG	2.56618
chr8	41755142	41755592	AAAGGCGCACAGAAG	981.286
chr3	14864034	14864454	AAAGGGCACAAACCA	2.56618
chr5	101266739	101267216	AAAGGGTGCGTGGGA	788.263
chr7	51880975	51881386	AAAGGGTGGATCAAT	947.952
chr15	72694436	72694965	AAAGGGTGGGGCGGT	935.974
chr10	77549376	77549878	AAAGGGTGTGGAGAG	778.29
chr18	16915852	16916489	AAAGGTAATTCCAAG	2.56618
chr1	196817130	196817753	AAAGGTACTCCCATG	869.958
chr13	102785023	102785553	AAAGGTAGGGGGGAG	764.841
chr10	86514344	86514801	AAAGGTAGGTTGAGG	797.697
chr5	125055051	125055538	AAAGGTCAATAATTC	375.79
chr9	108039660	108040143	AAAGGTCTTTATAAC	745.929
chr7	26429789	26430127	AAAGGTGACTAACAG	803.6
chr9	20624294	20624714	AAAGGTGCTCTCATT	921.563
chr12	35756082	35756612	AAAGGTTCGGTACGC	2.56618
chr6	71149445	71150083	AAAGGTTTCACTACA	841.707
chr8	128558874	128559306	AAAGGTTTCACTGAA	738.003
chr15	30824916	30825294	AAAGGTTTTCCCCGT	2.56618
chr7	100130398	100130944	AAAGTAAAAGGATCA	686.473
chr5	128026668	128027148	AAAGTAACATGACGA	801.549
chr14	67976470	67976926	AAAGTAACCTGGGAG	657.667
chr7	147903043	147903560	AAAGTAATTTTGTTG	612.414
chr11	6853031	6853532	AAAGTACTAAACAGA	821.078
chr15	97961374	97961782	AAAGTAGAACCATGA	2.56618
chr16	19969405	19969890	AAAGTAGTACGGGTG	2.56618
chr4	102406827	102407186	AAAGTATACAGGAAA	820.873
chr6	119146338	119146756	AAAGTATCCTCACCT	901.051
chr19	41226942	41227421	AAAGTATCTCGTAGC	906.721
chr11	78815419	78815838	AAAGTATCTTTGGCA	755.57
chr6	67099383	67100005	AAAGTCACATCATGA	963.379
chr5	53934468	53934903	AAAGTCACTCTGATA	741.329
chr13	41339577	41340115	AAAGTCCGTCAATAA	2.56618
chr13	41339728	41340244	AAAGTCGCAGTTCCA	727.273
chr3	55247704	55248135	AAAGTCTACGATCCC	712.494
chr6	53168529	53169134	AAAGTCTTCTGTTTC	2.56618
chr11	115081164	115081613	AAAGTGACGGTTGCT	644.905
chr12	81899225	81899628	AAAGTGAGGACTGTT	858.657
chr17	27570053	27570720	AAAGTGGCTAAGGGG	461.004
chr4	53528790	53529198	AAAGTGTTACTCATA	908.873
chr4	148290410	148290778	AAAGTTATTTTATAG	962.997
chr6	100306571	100307016	AAAGTTCCGTTCTAA	2.56618
chr12	37995177	37995649	AAAGTTGAGGGTGAC	2.56618
chr12	81899320	81899820	AAAGTTGAGTACCA	665.035
chr9	59797784	59798423	AAAGTTGATACATCG	2.56618
chr6	115878645	115879075	AAAGTTTCTATGACG	477.258
chr1	177361579	177362056	AAAGTTTGCTGCCCT	871.622
chr12	8451850	8452283	AAAGTTTTAACACAG	625.115
chr6	42309193	42309629	AAATAAATATCGCTC	473.461
chr5	120981708	120982161	AAATAACCCCTCCCG	2.56618
chr9	28491433	28492018	AAATAACGGACAATC	2.56618
chr6	51031147	51031582	AAATAACTCAACAGT	2.56618
chr4	55674993	55675394	AAATAAGAAAGGGTG	2.56618
chr5	34611989	34612515	AAATAAGCTTTCATG	735.913
chr16	96346355	96346804	AAATAAGTTTAAGCC	706.118
chr8	27669782	27670314	AAATAATACCTGCCT	793.142
chr1	48790097	48790711	AAATAATGCTAAGCG	820.53
chr6	142470265	142470722	AAATACAATATCGTC	2.56618
chr9	74504234	74504703	AAATACACATTAACA	540.826
chr17	47062824	47063258	AAATACACCAAGCCG	2.56618
chr4	88539168	88539598	AAATACAGACAGACC	2.56618
chr2	34958851	34959407	AAATACGAACGATAC	664.465
chr12	8441167	8441579	AAATACGAAGATTAC	2.56618
chr15	57543762	57544270	AAATACGCCTACATT	896.636
chr6	94570728	94571168	AAATACTCCGCAGTC	2.56618
chr16	41872200	41872709	AAATACTTACCACTG	2.56618
chr16	48331875	48332359	AAATAGAGCCTTGTC	834.284
chr8	116614347	116614851	AAATAGCACGATCTG	941.662
chr9	24724173	24724639	AAATAGCGTTCTGAT	2.56618
chr2	77528467	77528800	AAATAGGAAGGCTCT	2.56618
chr16	35413084	35413532	AAATAGGAATTACTT	836.688
chr4	108916936	108917341	AAATAGGCGACGACA	2.56618
chr4	117486658	117487070	AAATAGGTCGACCTA	2.56618
chr7	16460792	16461234	AAATAGGTCGGGAGG	873.057
chr1	28271070	28271402	AAATAGTGTCATTCC	904.527
chr11	83375864	83376345	AAATAGTTCGGCTGA	720.517
chr4	150471145	150471682	AAATATAACGCTAGC	2.56618
chr1	151519187	151519566	AAATATACAGCTTAT	880.239
chr18	66389330	66389834	AAATATAGACATTTT	2.56618
chr16	95980984	95981375	AAATATAGGTGGGAT	627.621
chr7	134942178	134942653	AAATATCATCAGTTT	817.922
chr7	147942226	147942802	AAATATGAGATGTAC	675.842
chr2	103333968	103334381	AAATATGGCCGATTT	520.464
chr14	56143614	56144126	AAATCAAGTGCGTTG	2.56618
chr5	92058292	92058865	AAATCACCAGTCCCT	760.638
chr15	7348595	7349182	AAATCACCCCTTTAT	843.405
chr10	92861246	92861754	AAATCACTACCTTAA	2.56618
chr11	42568267	42568781	AAATCATGATTTTCG	918.427
chr18	57833367	57833871	AAATCATTCTGATCA	2.56618
chr7	53799817	53800322	AAATCCGAAATGTGA	577.019
chr1	151745170	151745640	AAATCCGACCAAAAT	936.191
chr14	8832669	8833223	AAATCCGCTCGTATC	798.503
chr11	117197157	117197712	AAATCCGTGACTGTT	326.589
chr5	66453446	66453899	AAATCCTATACAGTG	690.936
chr1	53835278	53835612	AAATCCTGCCTGGTG	602.347
chr11	44761948	44762488	AAATCGAATACGCAG	2.56618
chr5	30879646	30880201	AAATCGACACTACAG	2.56618
chr15	86404594	86405112	AAATCGCAATCCAGG	721.741
chr6	35824768	35825250	AAATCGCACCATTTC	339.71
chr8	107990846	107991379	AAATCGCTGGCCAGT	181.129
chr8	128124169	128124651	AAATCGGCCTGCGTC	2.56618
chr2	157882695	157883067	AAATCGGGTATATG	799.783
chr2	135397183	135397722	AAATCGTATCCACGT	2.56618
chr8	70372524	70373067	AAATCGTCGGTGACC	904.45
chr2	77356641	77357137	AAATCGTGATTCACT	636.148
chr17	63665064	63665409	AAATCTACTAACGAA	789.969
chr7	52075507	52075906	AAATCTCCAAACGAC	2.56618
chr9	96342273	96342679	AAATCTGCTACCTCA	2.56618
chr8	73917025	73917522	AAATCTTAGCCGTGA	2.56618
chr3	114632569	114633008	AAATGAAACCTTATC	585.15
chr19	56645675	56646123	AAATGAAATAGAAGT	2.56618
chr14	70422727	70423257	AAATGAAATTATGAC	2.56618
chr3	59858059	59858511	AAATGAACGAAATAG	759.387
chr11	120313404	120313772	AAATGAAGCCTTATT	2.56618
chr14	47235810	47236156	AAATGAATCTCTGCC	660.053
chr14	76408987	76409470	AAATGACCTACATCA	994.749
chr13	12430071	12430591	AAATGACGTTGCAC	728.04
chr15	85926642	85927055	AAATGAGCATCTCAA	665.55
chr15	7139612	7140117	AAATGATCTCCTATT	2.56618
chr17	25858418	25858911	AAATGATTCCGGCGG	2.56618
chr17	75922015	75922474	AAATGCAAGCTTATT	848.344
chr6	34605918	34606325	AAATGCCAGTTGTGG	815.622
chr10	13215894	13216299	AAATGCCGCCACCCA	481.563
chr14	22893298	22893676	AAATGCGGTCCAGAC	386.258
chr8	73916986	73917562	AAATGGATGGCTACA	625.667
chr11	67495113	67495686	AAATGGCGTTCCTGT	871.069
chr3	82811428	82811898	AAATGGCTAGTAACA	847.45
chr2	54918188	54918615	AAATGGGAATTACTC	2.56618
chr2	72589150	72589695	AAATGGGCTAGGGAT	438.128
chr4	32332571	32333039	AAATGGTATGTTACT	759.162
chr11	31563302	31563693	AAATGGTTCCGGGAG	423.439
chr2	25327957	25328406	AAATGTATCAGGAAG	2.56618
chr5	125054978	125055596	AAATGTCCGTCTACT	2.56618
chr14	79519097	79519554	AAATGTCCTTAAGCG	871.635
chr1	82165538	82166071	AAATGTCGCATAGTT	920.139
chr9	74172039	74172522	AAATGTGCGATGTAA	2.56618
chr14	65060273	65060717	AAATGTGTAAAGTGG	852.6
chr8	85047858	85048264	AAATGTGTTCCATAA	2.56618
chr19	40406263	40406717	AAATGTTGCATAGGG	2.56618
chr5	31947305	31947814	AAATGTTTGTACTAA	886.65
chr4	117486159	117486755	AAATTAAGCCCTGTC	797.511
chr16	40228615	40229016	AAATTAAGTACTCAC	854.81
chr11	62756990	62757618	AAATTACACCGGTAT	761.603
chr5	96966123	96966593	AAATTACGTGGTATC	761.446
chr6	134110599	134111233	AAATTAGTATTAACG	2.56618
chr13	102820279	102820872	AAATTAGTTGATGGG	830.575
chr17	71829963	71830398	AAATTATAGTGGTGA	739.346
chr15	101856713	101857131	AAATTATTTCCATGC	882.182
chr15	7118190	7118657	AAATTCAAGTTCGTA	2.56618
chr2	131227353	131227944	AAATTCACAGATCCC	718.065
chr11	108689632	108690000	AAATTCACTCCACGG	751.596
chr3	95017480	95017937	AAATTCATCAGCCAT	814.134
chr15	76031179	76031594	AAATTCCAACTTAAC	804.013
chr12	25364892	25365218	AAATTCCCCCGACGT	208.879
chr17	66425255	66425670	AAATTCCCTCACCGT	800.82
chr1	43314733	43315224	AAATTCGAGCTTAAT	1004.41
chr9	62923023	62923431	AAATTCGTAAGGTAG	2.56618
chr18	64485615	64486025	AAATTGAATTTGAAT	798.812
chr18	39391754	39392208	AAATTGATAGTAGGA	577.019
chr18	64935116	64935526	AAATTGATGGCGGAT	2.56618
chr8	37469652	37470145	AAATTGCACGAGATT	550.458
chr18	49871115	49871522	AAATTGCACTTTGTC	2.56618
chr15	37656464	37656929	AAATTGCCATCTTTT	348.187
chr10	97066036	97066318	AAATTGCCTAGCTCC	2.56618
chr5	90914675	90915122	AAATTGGACGCATCT	664.101
chr10	97066036	97066502	AAATTGGGGGTACAC	2.56618
chr11	61281924	61282409	AAATTGGTAGGCTTT	795.515
chr13	37717762	37718250	AAATTGTCCCTAAAG	2.56618
chr17	45745275	45745680	AAATTGTGCCTTTGA	2.56618
chr6	29038202	29038596	AAATTGTTCTGGGTA	493.98
chr5	123140504	123140987	AAATTGTTGAACCGG	820.089
chr15	73553156	73553709	AAATTGTTTGTGAGG	921.412
chr11	75606945	75607426	AAATTTAAGTCCTAC	2.56618
chr1	51939953	51940413	AAATTTAGATACATC	862.665
chr2	79283059	79283600	AAATTTATGTCGATC	764.436
chr2	59365097	59365600	AAATTTCACATGGCT	628.214
chr7	128729105	128729515	AAATTTGACAGTGCT	2.56618
chr17	47518871	47519321	AAATTTGACAGTTAA	922.165
chr5	108018779	108019272	AAATTTGATGCGACT	750.734
chr9	105737834	105738290	AAATTTGCGCGTACT	2.56618
chr6	57463971	57464359	AAATTTGCGTCTAGT	874.812
chr14	70938500	70938932	AAATTTGTCTATTCC	668.392
chr1	12761415	12761920	AAATTTGTTTCTAGG	845.841
chr11	113788448	113788887	AAATTTTGATAAACC	750.734
chr1	179405855	179406524	AAATTTTGGCTCTTC	498.058
chr12	53572346	53572935	AAATTTTTAGCCATA	2.56618
chr11	113788534	113789002	AACAAAACATATGTA	1064.33
chr2	4858754	4859245	AACAAAACGCCAATG	548.791
chr10	79508272	79508750	AACAAAACTCACAG	776.805
chr12	101771382	101771776	AACAAAAGCCTGACT	2.56618
chr14	61642900	61643262	AACAAAAGGCTCAGA	848.137
chr6	22279156	22279686	AACAAAATCGCTTAC	677.72
chr7	15108120	15108664	AACAAACAATCTTTG	874.711
chr3	116487049	116487477	AACAAACACCCCATA	2.56618
chr16	78309403	78309848	AACAAACCGGAAAGG	2.56618
chr6	117963560	117964071	AACAAACCGTATTGC	269.759
chr7	81062990	81063429	AACAAACGCATCCCT	492.346
chr2	85053872	85054339	AACAAATACTCGCCC	983.815
chr9	46066967	46067474	AACAAATCCCGCACG	2.56618
chr18	38939516	38939919	AACAAATCCTTAGAG	2.56618
chr12	56498656	56499191	AACAACAAACGTGAT	964.33
chr9	113086066	113086467	AACAACAACCCTAAC	480.833
chr19	8957862	8958403	AACAACAACGTTTTA	470.453
chr8	97739679	97740186	AACAACACTGTTCGT	2.56618
chr1	172629479	172629913	AACAACATACGTACA	714.37
chr13	100180310	100180878	AACAACATGTATAGG	2.56618
chr9	69012280	69012755	AACAACATTTTTACG	2.56618
chr9	67397080	67397514	AACAACCATATGATT	377.068
chr1	58201056	58201457	AACAACCATTCCATC	833.388
chr12	86288709	86289154	AACAACCCATAGAAC	2.56618
chr16	9993794	9994298	AACAACCCGACCCCT	596.12
chr19	56810674	56811139	AACAACCCTCGTAAA	748.41
chr9	48016574	48017040	AACAACCTAAACCCC	2.56618
chr11	50520761	50521149	AACAACGAAGGCATA	2.56618
chr9	29251269	29251785	AACAACGGAACTAC	338.974
chr7	99606243	99606780	AACAACGTGCGCGGA	2.56618
chr1	41616135	41616554	AACAACGTGGCCGGA	2.56618
chr11	119831234	119831674	AACAACTACAACGTG	2.56618
chr12	8441242	8441594	AACAACTAGGGCTCA	2.56618
chr6	145200506	145200925	AACAACTAGTCAAAA	766.204
chr1	153443560	153444197	AACAACTCAGACCGA	800.613
chr9	119541274	119541638	AACAACTCCCTCACA	733.929
chr10	74967022	74967502	AACAACTCCTCGGGA	2.56618
chr2	35927048	35927557	AACAACTGTTTAACT	675.842
chr8	128124362	128124786	AACAAGAAAGCGAAA	625.115
chr6	75552617	75553078	AACAAGAAGCCGCCT	234.918
chr18	30553729	30554339	AACAAGAGACGGATC	423.439
chr15	88934813	88935166	AACAAGAGACTGGTT	805.173
chr9	29251243	29251692	AACAAGATCTCAAGC	2.56618
chr17	28064460	28064950	AACAAGATGCCTGCC	2.56618
chr6	137661714	137662234	AACAAGCCACCCACA	2.56618
chr11	51582008	51582485	AACAAGCGAATCGCA	359.682
chr17	85081851	85082444	AACAAGCGCACTCGA	2.56618
chr15	66014313	66014858	AACAAGCGTGGCGTT	712.187
chr14	56143068	56143483	AACAAGGAAGCCCGA	663.964
chr13	16373640	16374062	AACAAGGACCCATTA	2.56618
chr6	85799313	85799669	AACAAGGGAGTTTCG	2.56618
chr4	120563535	120564076	AACAAGGTACTGTGC	786.98
chr7	107810800	107811180	AACAAGTACTTCACC	2.56618
chr13	99769234	99769633	AACAAGTCTGAAGGC	2.56618
chr10	94824069	94824601	AACAAGTGTTGCGAG	513.846
chr6	122458586	122459026	AACAAGTTATGAACA	2.56618
chr14	70938318	70938907	AACAATACACATTGA	2.56618
chr4	97809572	97810028	AACAATACACGGACT	770.165
chr9	86595152	86595523	AACAATACCCAAATC	888.394
chr9	61275790	61276291	AACAATAGAGTTATT	2.56618
chr12	31019334	31019920	AACAATATACCTGCG	350.629
chr13	96007261	96007678	AACAATATCGCTCGG	2.56618
chr15	11676314	11676750	AACAATATTCACGCT	2.56618
chr17	67207978	67208532	AACAATCAAATCAGC	1042.66
chr7	85431631	85432018	AACAATCAACGCTGA	2.56618
chr12	74984804	74985457	AACAATCCACGATCT	579.194
chr15	12688160	12688487	AACAATCCGACTACA	754.513
chr7	133969594	133970199	AACAATCCGGACACT	161.432
chr3	58104777	58105284	AACAATCTATCTTCT	591.841
chr12	53035308	53035775	AACAATCTGTGAGGC	2.56618
chr1	185924337	185924817	AACAATGAAATCCTA	526.484
chr7	74232451	74233033	AACAATGCAGACAAG	950.366
chr1	51940197	51940659	AACAATTAGTAACTT	2.56618
chr13	69776963	69777331	AACAATTATTGTAAC	2.56618
chr3	105457058	105457517	AACAATTTCCATTCA	2.56618
chr10	16849458	16849918	AACAATTTGGGGTGT	2.56618
chr7	149317660	149318138	AACACAAAGCGGACT	783.354
chr2	124857737	124858175	AACACAAAGTTCATC	374.215
chr5	89119965	89120393	AACACAACTTGGACT	2.56618
chr5	66630375	66630831	AACACAATACGTTAT	794.217
chr2	5534907	5535546	AACACACAATTTAGT	2.56618
chr1	196404458	196404891	AACACACACACAACC	2.56618
chr10	41306795	41307420	AACACACACGGTGTA	2.56618
chr10	84426360	84426802	AACACACACTAACCT	2.56618
chr8	37469754	37470250	AACACACCGCTCAAT	2.56618
chr5	39520068	39520502	AACACACGTACCCGG	2.56618
chr2	91555184	91555554	AACACACGTCCGAGT	902.568
chr18	30553971	30554371	AACACACGTCTCACA	2.56618
chr10	92861096	92861546	AACACAGACAAACAC	980.919
chr2	18139179	18139667	AACACAGATGCAACT	2.56618
chr12	81605817	81606239	AACACAGGGTAGGAA	2.56618
chr7	109086126	109086697	AACACAGTCTAACAG	2.56618
chr2	101747611	101748159	AACACATAACTACCC	876.413
chr9	74504151	74504736	AACACATAATAGAGC	647.518
chr14	24313538	24314136	AACACATACTAGATG	786.974
chr10	24668248	24668711	AACACATAGTATCAT	2.56618
chr10	18861107	18861524	AACACATCATCAGGA	489.941
chr1	137490493	137490997	AACACATCCACAATG	734.692
chr5	27707521	27707951	AACACATCCCAGGAC	777.983
chr19	56645728	56646218	AACACATCCTAACTC	964.703
chr16	37789671	37790222	AACACATCGGTACGA	2.56618
chr5	90301628	90302091	AACACATCTCTGTAA	743.905
chr6	35824574	35824968	AACACATGGAGTCTT	607.591
chr7	70652950	70653376	AACACATTCGAAGCG	2.56618
chr12	8451603	8452060	AACACATTGGGTAAT	2.56618
chr17	34864608	34865112	AACACCAAACAGATT	2.56618
chr6	82701474	82702140	AACACCACAATCATT	774.857
chr8	127905300	127905866	AACACCAGCCCTGCA	2.56618
chr13	97858348	97858725	AACACCAGGCCTCTC	468.578
chr4	47720593	47721045	AACACCAGTGTACTT	706.041
chr12	105641982	105642403	AACACCATCAACGCT	2.56618
chr6	137661768	137662268	AACACCCCCCCCTCC	795.289
chr2	59439070	59439446	AACACCCCCGGCGGA	604.976
chr9	62922803	62923294	AACACCCGCTCCAGT	326.589
chr13	120128696	120129097	AACACCCGTTTTGCA	2.56618
chr15	80108908	80109375	AACACCCTACGGTCC	700.81
chr1	76100909	76101334	AACACCCTAGTGCTG	456.869
chr11	19501566	19502102	AACACCGATACCTGT	768.303
chr11	70200639	70201230	AACACCGCCTTTAGT	723.572
chr7	85534946	85535394	AACACCGTCACAACC	715.564
chr10	8488500	8488873	AACACCGTGCCTTTT	268.7
chr7	31907738	31908261	AACACCTAACGGCCT	788.235
chr11	100268550	100268977	AACACCTACAAAAAC	2.56618
chr2	71873465	71874125	AACACCTCGTTATCT	2.56618
chr9	83654827	83655344	AACACCTCTCGCCCA	594.523
chr12	74985024	74985432	AACACCTGGCGAATG	681.381
chr17	47062888	47063264	AACACCTTATACGGA	2.56618
chr2	26175185	26175588	AACACGAAAGCAGCC	2.56618
chr5	125317015	125317591	AACACGAAATACTAG	1000.68
chr18	33725697	33726135	AACACGACACCCTAA	2.56618
chr2	75268265	75268688	AACACGACTTTCATC	713.311
chr6	35312475	35313001	AACACGAGACCCCAG	502.553
chr8	95565006	95565469	AACACGAGTTTCGCA	923.388
chr9	29148979	29149387	AACACGCAACAACAT	616.361
chr13	41339485	41339962	AACACGCAATTCCCT	2.56618
chr5	125316924	125317266	AACACGCCAGGGAGA	569.234
chr7	87517239	87517552	AACACGCCCGTTTGG	481.38
chr14	121651621	121652199	AACACGCCGACCTTA	2.56618
chr12	113829097	113829756	AACACGGACTCCGAC	418.511
chr1	76547502	76547954	AACACGGAGCTTCGT	508.049
chr19	14333685	14334027	AACACGGCAGAGTGG	672.941
chr3	5450514	5451152	AACACGGCTGCACGT	2.56618
chr9	24701274	24701697	AACACGGGAACACTT	871.993
chr5	125316871	125317313	AACACGGGATCCATA	366.687
chr7	73340686	73341106	AACACGTACAGATTC	2.56618
chr5	130509689	130510182	AACACGTCTAGGAAA	2.56618
chr12	55482929	55483384	AACACGTCTCATCAC	794.571
chr15	12679688	12680150	AACACGTGTCATTGT	923.296
chr12	7460695	7461079	AACACGTTAGTTTCC	2.56618
chr9	71437124	71437578	AACACTAACCTGAAT	2.56618
chr5	96965905	96966390	AACACTAGGCTACGC	2.56618
chr10	24668249	24668754	AACACTAGTGGATGG	645.688
chr12	113829043	113829447	AACACTAGTTGCGTT	206.551
chr4	53152459	53152984	AACACTATACATAAC	2.56618
chr10	24191165	24191689	AACACTCAACTGTAG	829.634
chr7	75841419	75841839	AACACTCAATTAAAC	2.56618
chr2	6300700	6301026	AACACTCACAAGGAT	619.373
chr19	29587990	29588384	AACACTCACCCTGAC	826.109
chr12	45655701	45656124	AACACTCACGCTTCC	2.56618
chr2	77635307	77635740	AACACTCCACTTACA	758.552
chr12	31019263	31019741	AACACTCCCCTGAGT	644.526
chr18	66129665	66130262	AACACTCCCGTTCCT	859.992
chr3	28040745	28041158	AACACTCGTCATCCG	778.433
chr1	92572776	92573353	AACACTCTTACAATA	927.64
chr15	80109109	80109623	AACACTCTTCGATGA	692.49
chr5	116976052	116976478	AACACTGAAAATCCT	996.114
chr2	3407289	3407698	AACACTGCCCATGTA	2.56618
chr6	139795789	139796180	AACACTGCGCACCAT	2.56618
chr3	118193852	118194424	AACACTGCTTCTGAC	2.56618
chr9	96727661	96728124	AACACTGTTTCCCTA	2.56618
chr3	95896061	95896674	AACACTTACTAGTTA	2.56618
chr12	10521087	10521427	AACACTTCAACCGTC	488.669
chr8	42212932	42213430	AACACTTGCGGCCTA	728.485
chr16	24090066	24090527	AACAGAAACCTGCAG	2.56618
chr1	136674504	136675005	AACAGAAAGATATTG	2.56618
chr18	25007068	25007463	AACAGAAAGCTTAAC	809.079
chr13	41339573	41340116	AACAGAAAGGAGACG	529.893
chr5	66453503	66454002	AACAGAAAGGGATTG	2.56618
chr16	23996521	23997034	AACAGAACAACGTTC	891.659
chr9	77666670	77667176	AACAGAACATTGGAT	2.56618
chr1	189273102	189273523	AACAGAACGAGCGAA	2.56618
chr2	180435766	180436276	AACAGAAGCATTACT	2.56618
chr4	6166270	6166682	AACAGAAGGCTGGTA	560.111
chr11	80051856	80052316	AACAGAATGTGCATT	583.62
chr9	64661955	64662424	AACAGAATTTGATCG	2.56618
chr13	42790285	42790896	AACAGACCGGCTCGG	636.803
chr10	23431325	23431936	AACAGACGGATGATA	2.56618
chr8	120191226	120191674	AACAGACGGATTTAT	2.56618
chr6	113217002	113217516	AACAGAGAATCTACA	2.56618
chr11	75726350	75726791	AACAGAGACGCTACA	2.56618
chr6	145293191	145293803	AACAGAGATCAAAGG	653.731
chr2	112356690	112357087	AACAGAGCCTGCCCA	620.602
chr14	75550419	75550926	AACAGAGGATATGAT	813.236
chr15	12144906	12145431	AACAGAGGGAGGGAT	816.894
chr10	79508649	79509206	AACAGAGTAAGCGTG	2.56618
chr8	95565035	95565379	AACAGATAAAAACAT	702.987
chr1	84446177	84446624	AACAGATAACGGACC	567.414
chr15	85825061	85825499	AACAGATCAGGCTTT	673.568
chr10	118236698	118237162	AACAGATGCAGCATT	2.56618
chr6	139857474	139857916	AACAGATTGCAGTGG	618.577
chr12	10521105	10521585	AACAGATTTCCATCC	728.653
chr12	31019182	31019666	AACAGCACCCCCTGT	852.343
chr2	130744552	130745007	AACAGCACCCTACAG	911.988
chr13	41339912	41340340	AACAGCAGCTTGTGA	767.039
chr8	41700757	41701184	AACAGCAGTCGTTCT	2.56618
chr15	80109026	80109389	AACAGCCACTTGGGC	619.183
chr1	172255517	172255881	AACAGCCATCAATTT	409.306
chr10	87129635	87130080	AACAGCCATGGGTAG	696.543
chr10	41959452	41959884	AACAGCCCACCCGGG	809.785
chr14	28083026	28083468	AACAGCCCCACCGAC	511.794
chr12	112479945	112480436	AACAGCCTAAACCAT	2.56618
chr4	150471036	150471644	AACAGCCTCACGCCC	776.189
chr3	19900873	19901312	AACAGCGCCAACCCC	885.42
chr5	31126294	31126708	AACAGCGCGCTCGAC	2.56618
chr2	124857584	124858156	AACAGCGTTAACAAT	954.256
chr12	86288794	86289242	AACAGCTGCACTCGC	2.56618
chr9	108983099	108983584	AACAGCTGCCCTTGC	412.662
chr2	163225192	163225618	AACAGCTGTACTATC	2.56618
chr17	85131916	85132333	AACAGCTTGTTTCGC	2.56618
chr9	100371560	100372107	AACAGGACAAGAGCC	2.56618
chr14	106152105	106152617	AACAGGACCACAAAC	2.56618
chr5	68439913	68440343	AACAGGCATCAACCA	2.56618
chr16	89991900	89992400	AACAGGCCTCGGCTT	634.879
chr8	37469586	37469997	AACAGGCTTACAAGA	719.642
chr11	53336597	53337059	AACAGGGATCTATTA	393.046
chr19	17387122	17387638	AACAGGGGCTCCACG	375.79
chr10	38525824	38526383	AACAGGGTCATTTAC	2.56618
chr13	49006661	49007071	AACAGGTATCGCAAT	2.56618
chr10	65644146	65644685	AACAGGTCACACTTG	885.836
chr19	23560503	23560924	AACAGGTCAGAAAGC	2.56618
chr10	89028506	89029072	AACAGTACCCGCTCG	820.607
chr11	57746411	57746934	AACAGTACTAAGGTA	2.56618
chr7	51728478	51728993	AACAGTACTGGGGTA	618.289
chr11	80914408	80914820	AACAGTCAAACAAAT	741.329
chr2	91016187	91016767	AACAGTCAAACCGAG	654.007
chr18	20219090	20219653	AACAGTCCTAGGTAG	733.112
chr8	46347242	46347726	AACAGTCTACGAGAC	2.56618
chr3	81779404	81779833	AACAGTGCCGCTCTG	569.234
chr6	24566434	24566997	AACAGTGCGACTATC	2.56618
chr19	37516948	37517519	AACAGTGCGCAGCGG	679.383
chr1	138863485	138864073	AACAGTTGCATAGC	877.905
chr18	64510152	64510569	AACAGTTGTCCCATA	2.56618
chr1	167351420	167351882	AACAGTTTGCATTGT	2.56618
chr7	90899557	90900025	AACAGTTTTCTGTCT	2.56618
chr11	100891616	100892127	AACATAAATTAGAGT	584.448
chr3	63243917	63244264	AACATAACAAGCGGC	2.56618
chr6	121255551	121255984	AACATACACCGCGTG	839.975
chr4	47621343	47621799	AACATACACCTACGC	890.676
chr9	67011387	67011981	AACATACACGATTAC	2.56618
chr4	32332653	32333151	AACATACAGTTCGTG	628.006
chr1	177361181	177361671	AACATAGAAACACGA	445.881
chr11	63691796	63692286	AACATAGACTAGCTA	2.56618
chr8	47968800	47969358	AACATAGCTAGCGTC	444.327
chr15	82626433	82626951	AACATAGCTCCCTCA	670.224
chr3	107593156	107593559	AACATAGGGTCGGAG	2.56618
chr4	97809598	97810036	AACATAGTGCACGGC	2.56618
chr7	56034426	56034806	AACATAGTGGAGGGG	903.73
chr17	27570309	27570752	AACATATAAATGTCA	804.684
chr6	24547496	24547934	AACATATAGGCCATT	2.56618
chr18	16949796	16950230	AACATATCGGTTACC	614.06
chr7	106514568	106515020	AACATATTACTGGCC	775.951
chr7	16493093	16493626	AACATCAAGATCATC	679.065
chr12	8451832	8452299	AACATCAAGGGCTGA	723.39
chr19	40800682	40801048	AACATCACCGTACTC	553.624
chr12	31019338	31019841	AACATCACCTAGTGT	2.56618
chr1	153443662	153444179	AACATCACCTCCAAG	2.56618
chr3	37450499	37450969	AACATCATATAACAC	678.576
chr18	64934995	64935479	AACATCATTTCCCCG	2.56618
chr19	44161453	44162081	AACATCCAAAACGAG	768.58
chr13	55292674	55292988	AACATCCAAACTTAT	2.56618
chr1	52479065	52479548	AACATCCATTCCCCA	247.256
chr15	34264608	34265065	AACATCCGTTGAAGC	2.56618
chr10	11038111	11038325	AACATCCTAGTACGC	1078.46
chr8	60017112	60017543	AACATCCTCGCTCTA	566.759
chr3	10127807	10128273	AACATCTCTCCGTAG	870.622
chr12	9927146	9927577	AACATGAAAAGCAAC	2.56618
chr9	46007874	46008257	AACATGAATGCGCGG	2.56618
chr5	116895328	116895917	AACATGACTGATAAC	559.663
chr15	3590058	3590520	AACATGAGCCAACGC	547.421
chr4	101065749	101066162	AACATGCACCAGAGC	851.815
chr2	167284808	167285183	AACATGCGGCGTTTC	694.839
chr14	70938329	70938852	AACATGCGTATATCT	2.56618
chr16	28402447	28402911	AACATGCTGCCAGGG	634.279
chr5	104556968	104557500	AACATGGAAGTAACT	668.392
chr15	59485508	59485947	AACATGGAGTATTGA	466.571
chr8	128558828	128559273	AACATGGGAGTGAAC	655.148
chr1	34186706	34187149	AACATGTATGACGTC	2.56618
chr2	75268083	75268557	AACATGTGCCTGTCG	2.56618
chr2	94169636	94169999	AACATGTGTCTTGTC	780.465
chr14	48251968	48252484	AACATTCCACATAGC	2.56618
chr9	30090603	30091050	AACATTCCATTGGCC	675.601
chr7	112665177	112665653	AACATTCCTCCGTCT	2.56618
chr2	129652185	129652699	AACATTCCTCGGGTT	840.122
chr4	117795436	117795851	AACATTCGCTAGCGC	423.439
chr12	107258134	107258566	AACATTGGTTTAGTA	526.484
chr18	49870969	49871466	AACATTTCCAACCGG	2.56618
chr12	10521182	10521648	AACATTTCTGCCGAA	2.56618
chr3	42212731	42213303	AACATTTCTTCCTAG	2.56618
chr5	120981518	120982064	AACATTTGAGCCAAA	2.56618
chr19	41226780	41227217	AACATTTGCTAGTTG	2.56618
chr5	30879823	30880203	AACATTTTTGGCTGG	793.148
chr18	20313837	20314263	AACCAAAAAAGGTGC	2.56618
chr4	15076737	15077254	AACCAAAAAGTTGGT	752.205
chr6	118674758	118675222	AACCAAAACAGCGAT	2.56618
chr11	93135229	93135553	AACCAAACACTGCAT	585.6
chr16	57863509	57863912	AACCAAAGATTTTTG	878.036
chr4	19919137	19919553	AACCAAATGAACACA	490.737
chr14	79518896	79519313	AACCAACACACGTCC	2.56618
chr18	66320066	66320648	AACCAACATAGAACG	420.945
chr9	42558954	42559482	AACCAACATGAGCCC	2.56618
chr11	51581671	51582039	AACCAACCACTGAGA	478.674
chr15	30824884	30825297	AACCAACCCGTCCCA	2.56618
chr4	101677948	101678402	AACCAACGATTCCGA	2.56618
chr3	55247571	55248176	AACCAACGCAACATT	2.56618
chr7	86403872	86404342	AACCAACGTCAGTGT	2.56618
chr1	82176967	82177433	AACCAACGTCCAAGT	510.908
chr14	19795760	19796319	AACCAACTCAAATT	2.56618
chr16	78309655	78310081	AACCAACTCTTATAC	2.56618
chr9	118941042	118941407	AACCAACTTACTGAC	793.542
chr10	40061804	40062385	AACCAAGAGCAACAA	638.244
chr10	39186893	39187445	AACCAATACAGGCTG	2.56618
chr7	88732265	88732674	AACCAATTAGTCTCT	824.004
chr9	42087780	42088269	AACCAATTATGATCG	906.379
chr2	156111137	156111551	AACCACAAAAAAGAC	502.553
chr6	115188519	115189009	AACCACAATATATTC	2.56618
chr8	49630980	49631462	AACCACACCTCCTAG	561.894
chr6	24566875	24567363	AACCACACGAGGCCC	2.56618
chr2	12939607	12940119	AACCACAGAATTAAC	2.56618
chr8	46349849	46350459	AACCACCACTCTGCC	700.326
chr10	13216151	13216647	AACCACCAGGGATTT	637.341
chr18	32078187	32078747	AACCACCATACCGGC	805.587
chr14	61977132	61977637	AACCACCCAGTTACT	438.336
chr2	128333048	128333658	AACCACCCATACTCA	719.642
chr2	154391442	154391838	AACCACCCCGGACCT	750.734
chr1	17050101	17050669	AACCACCCCGGGGGC	634.093
chr16	40228506	40229090	AACCACCCTGTTACA	846.862
chr9	56375781	56376381	AACCACCGCTCTATT	2.56618
chr4	132664700	132665208	AACCACCGGACACTC	2.56618
chr9	65994075	65994433	AACCACCTCACCCGA	798.613
chr1	137903786	137904309	AACCACCTCAGAGTT	2.56618
chr15	73553165	73553605	AACCACCTCTGCCCC	699.567
chr11	106363548	106364120	AACCACCTGACGTGT	626.939
chr17	71829800	71830220	AACCACCTGAGACTC	2.56618
chr2	65496373	65497005	AACCACCTGCGTTAA	2.56618
chr18	73294606	73295131	AACCACGAACACAAA	2.56618
chr9	108039344	108039880	AACCACGCATGTAGA	763.302
chr11	3621657	3622127	AACCACGCCACTCTA	2.56618
chr15	23326390	23326817	AACCACGCCTGCACA	2.56618
chr2	153789100	153789499	AACCACGTTACTAGT	2.56618
chr15	34264673	34265267	AACCACTAAATCTGT	2.56618
chr8	48869874	48870322	AACCACTATACATGC	942.374
chr6	95886259	95886721	AACCACTCTTGATAC	795.897
chr4	63590625	63591021	AACCACTGCAGTACA	787.612
chr2	50148946	50149379	AACCAGCACGCGCAT	803.419
chr10	96852396	96852821	AACCAGCGCTCGGTG	2.56618
chr11	97468537	97468935	AACCAGCTCACGATC	427.557
chr9	44126184	44126604	AACCAGCTCCCGAGT	848.343
chr10	123283704	123284077	AACCAGGCAACAAAG	2.56618
chr13	44424709	44425120	AACCAGGCAATAGAC	2.56618
chr6	113217221	113217718	AACCAGGGGAGGACA	2.56618
chr18	43020435	43020943	AACCAGTACGACCAA	550.26
chr4	53528865	53529452	AACCAGTAGGGACTA	2.56618
chr16	9993973	9994352	AACCAGTCCCAATGT	2.56618
chr14	57855419	57855921	AACCAGTTCAGCCAC	2.56618
chr8	107133888	107134533	AACCATAAACAGTGA	2.56618
chr2	180435809	180436394	AACCATACCCCAAAA	2.56618
chr10	127388308	127388818	AACCATAGAGAATGT	516.256
chr16	23191456	23191848	AACCATATATTACGA	2.56618
chr2	180217524	180218058	AACCATATCGATTCA	2.56618
chr11	117419139	117419529	AACCATATGCATTGA	583.174
chr2	41837869	41838340	AACCATATTGGGTCG	820.245
chr8	41754652	41755099	AACCATCAAGTACAC	825.113
chr3	106975433	106975988	AACCATCAATAACGG	2.56618
chr1	133247876	133248355	AACCATCAATCCCTG	2.56618
chr16	36559709	36560026	AACCATCCGTTACTC	2.56618
chr11	67495670	67496115	AACCATCCTCCGATG	849.814
chr10	74980321	74980735	AACCATCCTGCGCAC	1086.07
chr14	61050327	61050764	AACCATCGAGTCTCA	847.269
chr5	73730883	73731285	AACCATCGTTTACAT	795.978
chr11	35776794	35777229	AACCATCTGATATTC	335.729
chr5	65465911	65466418	AACCATCTTCCACAC	2.56618
chr10	11037871	11038475	AACCATGAATTACAA	957.567
chr1	157655587	157656032	AACCATGACCCCTAA	566.759
chr7	70701291	70701699	AACCATGACGGGAGC	2.56618
chr9	62319378	62319865	AACCATGAGAGTGTT	753.11
chr4	55674800	55675203	AACCATGCCCTCCTA	472.449
chr10	73324913	73325280	AACCATTAAGGGCAC	2.56618
chr7	52419622	52420161	AACCCAACCAACGTT	2.56618
chr4	141682932	141683455	AACCCAACCGCGACT	369.632
chr9	100460987	100461401	AACCCAATACCTAGC	632.077
chr18	65675207	65675611	AACCCAATCAATATGG	2.56618
chr1	153443604	153444097	AACCCACACACATCG	2.56618
chr17	4641115	4641720	AACCCACACCTCCTG	784.933
chr10	80869108	80869673	AACCCACCCCACCAC	556.407
chr9	24224265	24224719	AACCCACCCCCAAGC	2.56618
chr15	96871435	96872007	AACCCACCGTTTCCT	839.631
chr19	4032727	4033196	AACCCACCTATACAA	658.295
chr8	41754579	41755010	AACCCACCTGATCTG	2.56618
chr9	96727870	96728361	AACCCACGACTTGCC	718.324
chr8	117124193	117124622	AACCCACGTATGAAA	2.56618
chr5	130950747	130951166	AACCCACTCGTCTCT	2.56618
chr18	25006833	25007336	AACCCACTTGCGCCG	2.56618
chr19	6662495	6663045	AACCCAGCGCAGTAT	703.872
chr2	131227467	131227994	AACCCAGCTTAGAAA	2.56618
chr4	64292958	64293548	AACCCAGTTCTGACG	768.541
chr15	51079460	51079866	AACCCATCAAATGAC	794.571
chr10	115438827	115439348	AACCCATCTAGCCTT	881.566
chr7	90899425	90900028	AACCCATTAATCCGT	814.023
chr15	26306896	26307431	AACCCATTTGCGCGA	2.56618
chr9	25136682	25137317	AACCCATTTTCTTTC	876.516
chr3	21905636	21906094	AACCCCACCCGACCA	749.9
chr6	59401239	59401758	AACCCCACGAAGTCC	2.56618
chr13	59039911	59040286	AACCCCACGCCGGAA	2.56618
chr1	51939913	51940428	AACCCCAGTGACTTG	2.56618
chr2	124466863	124467296	AACCCCAGTGTTCCA	2.56618
chr15	66737918	66738442	AACCCCATACACTTC	902.75
chr8	109358949	109359341	AACCCCATATTAAAT	2.56618
chr2	157656316	157656840	AACCCCATCACACTG	2.56618
chr18	64934908	64935427	AACCCCATCGATTCC	923.648
chr7	16998279	16998768	AACCCCATCTCACTC	2.56618
chr11	89861730	89862177	AACCCCCAAATTCCA	2.56618
chr5	104557208	104557543	AACCCCCAATAAACA	2.56618
chr5	122544350	122544779	AACCCCCACGCAATG	748.065
chr12	112044832	112045305	AACCCCCAGCACGGT	2.56618
chr7	116105388	116105871	AACCCCCATCCCTCT	562.289
chr12	104600805	104601239	AACCCCCCACAACTT	363.827
chr7	73153415	73153872	AACCCCCCCTTGTAT	441.289
chr6	113378043	113378514	AACCCCCCGCTGATC	841.466
chr1	137435278	137435750	AACCCCCCGTCTCAT	809.291
chr5	107611623	107612033	AACCCCCCTACCTGC	654.483
chr1	122150429	122151033	AACCCCCCTATCCGA	987.454
chr4	7122867	7123361	AACCCCCGCTCTCAA	505.265
chr2	181258501	181258941	AACCCCCGTAAGGCG	2.56618
chr9	102874757	102875286	AACCCCCGTACCAAA	2.56618
chr12	99691293	99691774	AACCCCCGTCTCATG	716.409
chr1	170164338	170164772	AACCCCCTCCCCTGG	2.56618
chr12	105642213	105642589	AACCCCGACTGGATC	2.56618
chr2	156734859	156735297	AACCCCGAGTCTGAA	2.56618
chr8	42220379	42220833	AACCCCGCCCGGCTG	639.612
chr10	76436416	76436943	AACCCCGCCGGTTAC	514.887
chr1	188223876	188224230	AACCCCGCGAATCCA	2.56618
chr6	146285959	146286396	AACCCCGGCGAGACA	504.353
chr11	5326497	5326961	AACCCCGGCTAACAC	2.56618
chr2	157656249	157656818	AACCCCTAGGGACAG	2.56618
chr6	142834067	142834522	AACCCCTCTCACGAT	730.74
chr9	57793339	57793703	AACCCCTGGTCACCG	445.101
chr13	12429940	12430457	AACCCCTTGAAGGCC	477.822
chr9	71436932	71437415	AACCCGAACTAGAAC	438.128
chr6	23258534	23258897	AACCCGACCACGTTT	2.56618
chr3	83255133	83255690	AACCCGATCATTGCT	628.834
chr3	19544139	19544551	AACCCGATGGATGAC	2.56618
chr18	39331870	39332327	AACCCGCATAACCAC	497.327
chr11	98917364	98917915	AACCCGCCGGCATAG	2.56618
chr10	84426421	84426806	AACCCGCCTTACGCT	914.794
chr19	40406540	40406909	AACCCGCTCCACTTC	2.56618
chr18	44715353	44715752	AACCCGGCAACGGGG	2.56618
chr16	96339435	96340089	AACCCGTAATAGATC	2.56618
chr4	151673521	151674028	AACCCGTCCAGACTA	2.56618
chr2	177865400	177865869	AACCCGTGCCGCTAG	2.56618
chr8	41754776	41755236	AACCCTAAACACCCT	818.848
chr7	121170904	121171375	AACCCTAATATACGC	2.56618
chr6	142470395	142470867	AACCCTACACACGGA	944.517
chr9	96342013	96342558	AACCCTACAGTACGC	2.56618
chr10	23431145	23431512	AACCCTACCTGCCCA	570.426
chr4	117543734	117544115	AACCCTACGCAACGG	2.56618
chr3	95017433	95017954	AACCCTAGTAATATG	2.56618
chr1	176861252	176861661	AACCCTATACTCGAC	2.56618
chr4	128398538	128399025	AACCCTCAATCACGT	1033.96
chr16	78309493	78309965	AACCCTCCTCCCTGC	807.112
chr11	81875766	81876172	AACCCTCGGAAAATC	898.327
chr13	49267443	49267900	AACCCTCTAACGCGG	366.687
chr11	4017371	4017966	AACCCTCTACACCTC	526.484
chr8	113483787	113484308	AACCCTCTATAAACG	2.56618
chr5	88990412	88990845	AACCCTCTGCGATGC	710.607
chr19	41422594	41422949	AACCCTGGCAGGAAC	2.56618
chr7	140478554	140479007	AACCCTGGTATCAGA	271.914
chr3	121756238	121756675	AACCCTTACGCCGCC	353.133
chr14	8832596	8833018	AACCCTTATACTGAC	2.56618
chr6	119130156	119130649	AACCCTTCCAGAAAC	2.56618
chr8	26531724	26532153	AACCCTTGCCCATGG	893.672
chr16	31647456	31647910	AACCCTTTAGGGAAA	2.56618
chr4	87842072	87842592	AACCCTTTATAGAGT	773.121
chr8	38485657	38486037	AACCGAAAGAAGAAT	509.947
chr10	94824113	94824589	AACCGAATCCCTATT	753.737
chr7	88732186	88732817	AACCGAATCGTTGTC	849.586
chr8	67137952	67138286	AACCGAATTTCAAAC	827.132
chr19	22957192	22957835	AACCGACACCCTTAA	396.876
chr6	24566474	24566961	AACCGACAGAGATGT	936.73
chr7	16998384	16998896	AACCGACCGACTTGC	2.56618
chr6	113217198	113217655	AACCGACGACAACGC	2.56618
chr9	68250652	68251163	AACCGACGGAAACTA	317.344
chr4	141207478	141207876	AACCGACTACTTCAA	757.681
chr2	119880365	119880800	AACCGACTCACTACC	731.804
chr7	100130481	100130861	AACCGACTCCAGTTGT	2.56618
chr15	30824841	30825181	AACCGAGAAAACTCC	2.56618
chr13	59658923	59659317	AACCGAGATGAACCC	659.198
chr10	42654325	42654764	AACCGAGCGGCCTAC	2.56618
chr2	180218018	180218456	AACCGAGGGCAAGGG	636.668
chr17	27570337	27570659	AACCGATAACCAAAG	842.352
chr9	61275700	61276137	AACCGATCCCCCCCC	819.203
chr17	91312568	91313024	AACCGATGTACCGAG	724.726
chr12	83173531	83174090	AACCGATTATCGAGT	985.163
chr9	42087610	42088030	AACCGCATGTTCAGT	2.56618
chr18	51324767	51325145	AACCGCCAACAACAA	2.56618
chr7	107810812	107811244	AACCGCCATCAACAC	2.56618
chr3	105457166	105457560	AACCGCCTATTGTAT	686.335
chr10	44184357	44184806	AACCGCCTCTCCCCA	2.56618
chr10	96852638	96853156	AACCGCCTTGCGATT	776.656
chr1	189272898	189273430	AACCGCGATATCACA	746.803
chr19	53863978	53864554	AACCGCTAACAGCGG	832.912
chr5	125810367	125810795	AACCGCTAAGGATGA	2.56618
chr4	150471266	150471683	AACCGCTGATTTCAC	749.611
chr13	42834288	42834715	AACCGCTGGAGCTAA	848.046
chr9	61275869	61276258	AACCGCTTATAACAG	2.56618
chr15	51079443	51079914	AACCGGAAACTCGGG	2.56618
chr14	70938174	70938761	AACCGGCATCAAAGC	679.065
chr1	17049789	17050355	AACCGGCGCCCTTTA	792.935
chr16	8603637	8604236	AACCGGCTCTGGTAT	715.564
chr8	127905486	127905929	AACCGGGCACAACGC	2.56618
chr3	115888303	115888746	AACCGGGGCTCGAGG	2.56618
chr17	48691032	48691461	AACCGGGTCATTCTG	2.56618
chr6	59401113	59401653	AACCGGTACTAGGTA	2.56618
chr6	50606040	50606443	AACCGGTTGCTTGGT	302.648
chr5	77560670	77561183	AACCGTAACCTTCTT	2.56618
chr3	103452205	103452676	AACCGTACACACAGC	843.503
chr5	103020274	103020795	AACCGTACATGCAAG	2.56618
chr14	70753256	70753710	AACCGTACCACGAAG	2.56618
chr6	95886691	95887160	AACCGTACTACCCCA	727.76
chr2	138414689	138415116	AACCGTATATTCATA	2.56618
chr2	14851602	14852199	AACCGTATGGTACTA	457.45
chr1	193601123	193601788	AACCGTCATCCGACC	2.56618
chr5	34612149	34612413	AACCGTCCACTGTTC	311.36
chr12	81899238	81899717	AACCGTCCATCCACA	2.56618
chr13	44548479	44548827	AACCGTCGCTCAAAG	2.56618
chr4	148290480	148290992	AACCGTCTACTACGA	550.989
chr9	75156212	75156676	AACCGTCTCCGCTTA	680.918
chr14	77197495	77197996	AACCGTGCAACAAAT	2.56618
chr1	28271027	28271487	AACCGTGGGTTGGAC	2.56618
chr8	115105262	115105729	AACCGTTATATAAAA	533.414
chr5	39610721	39611306	AACCGTTCTTCTAAG	2.56618
chr4	32657680	32658283	AACCGTTGAATTTTA	2.56618
chr16	38361991	38362399	AACCGTTGACTCGTA	853.646
chr8	23576327	23576724	AACCGTTTTTCTATC	2.56618
chr6	113217091	113217504	AACCTAAAACATGAT	2.56618
chr5	44471547	44472137	AACCTAAACATCGAA	2.56618
chr1	107360413	107360882	AACCTAAACCATGAG	2.56618
chr13	12430240	12430650	AACCTAAATTAGGGG	580.298
chr2	103686975	103687400	AACCTAACCCCAGTT	442.797
chr1	190889331	190889793	AACCTAACCTCAACC	1002.04
chr4	150471182	150471622	AACCTAACGGCCTCT	459.212
chr5	92058348	92058890	AACCTAAGACTGAGT	2.56618
chr10	22607205	22607615	AACCTAAGCCTAGGT	702.475
chr2	38358240	38358660	AACCTAATAATGGAC	2.56618
chr9	108040108	108040715	AACCTACATACCGAC	395.584
chr3	146232908	146233486	AACCTACCATTGGCC	761.204
chr12	32198585	32199032	AACCTACCCAATCCT	355.702
chr4	47651621	47652111	AACCTACCTAGCACC	2.56618
chr8	14748621	14749186	AACCTACGACTGCGC	872.607
chr7	15023862	15024207	AACCTACGCCTCCGG	2.56618
chr4	97809598	97809968	AACCTACGGAATACG	885.831
chr14	70422767	70423273	AACCTACTACCATAA	917.77
chr6	85465712	85466300	AACCTAGAATCTCAC	406.697
chr4	6189944	6190341	AACCTAGCGTACCCA	2.56618
chr11	106373097	106373561	AACCTAGCGTTTATA	437.61
chr11	35788117	35788524	AACCTAGTTGCACAT	2.56618
chr12	87848435	87848981	AACCTATGCAAATTC	2.56618
chr5	104665639	104666094	AACCTCAACCAGCAC	636.148
chr11	36379618	36380126	AACCTCACCCCCACC	2.56618
chr2	101488783	101489370	AACCTCAGGTTTCTG	374.215
chr3	146232976	146233491	AACCTCATACAACCA	943.871
chr1	76100750	76101175	AACCTCATCATCCCT	2.56618
chr2	50545749	50546226	AACCTCATGTATGCA	834.337
chr15	99174845	99175257	AACCTCCACACTCCT	871.112
chr4	102406842	102407410	AACCTCCCACGCATA	773.181
chr2	44489658	44490079	AACCTCCCGCCAGAC	398.847
chr9	121811153	121811573	AACCTCCCTCCACAT	627.059
chr18	44715650	44716191	AACCTCCCTCCCCCA	764.048
chr4	116079180	116079590	AACCTCCCTCTAGAC	833.393
chr16	82661300	82661771	AACCTCCGCTCCACA	309.716
chr5	150185001	150185364	AACCTCCGGGGCCGA	2.56618
chr17	25858411	25858813	AACCTCGAAACCCGA	2.56618
chr8	60017080	60017571	AACCTCGAAAGACGT	529.399
chr1	92572848	92573280	AACCTCGGGGTGGCG	790.232
chr8	41755100	41755551	AACCTCGTTGTTCTA	2.56618
chr5	21992475	21993056	AACCTCTACGCTACC	369.632
chr14	64812680	64813110	AACCTCTGCATAAAC	518.531
chr6	118029866	118030401	AACCTCTTCAAGCTT	452.334
chr11	83555408	83555869	AACCTCTTTTCTAAC	2.56618
chr9	41006385	41006824	AACCTGACTCACCTG	2.56618
chr10	67165471	67165927	AACCTGAGATGTATG	2.56618
chr8	73916801	73917268	AACCTGAGGGGCCAT	432.669
chr13	9075121	9075497	AACCTGAGTGAGGGC	715.945
chr7	122610184	122610567	AACCTGATGCGGCTG	566.759
chr19	29587948	29588375	AACCTGCAGCCTCAC	2.56618
chr6	117122443	117122790	AACCTGGCGCCCTGA	2.56618
chr6	119130164	119130756	AACCTGGTGACCGGA	366.687
chr15	97961594	97962070	AACCTGTGCATAGAT	2.56618
chr5	90301691	90302092	AACCTGTTACAATCG	2.56618
chr1	40212641	40213149	AACCTGTTAGCCGCA	867.104
chr12	40043607	40044126	AACCTGTTGACGTAC	787.81
chr15	93150200	93150653	AACCTGTTTTTTATA	832.66
chr5	135576741	135577272	AACCTTAAGCCGGCG	696.487
chr12	74488090	74488685	AACCTTACTTTCCGA	916.776
chr18	20218944	20219360	AACCTTATAAGTATA	872.764
chr4	53152313	53152669	AACCTTATAGTTCCC	873.995
chr1	17049795	17050193	AACCTTCAACTAACC	852.34
chr11	63664469	63664839	AACCTTCACTCCGTC	2.56618
chr9	49413577	49414109	AACCTTCCAGAGCTG	939.817
chr15	99300424	99300846	AACCTTCCATTCCCT	877.859
chr18	24493533	24494070	AACCTTCTTGTGATT	742.724
chr19	23099344	23099763	AACCTTGAAGAAAGC	2.56618
chr2	141443641	141444155	AACCTTGATTCATCA	2.56618
chr11	7092535	7092927	AACCTTGCGTCGCCG	2.56618
chr2	180217718	180218138	AACCTTGGCCATTTG	2.56618
chr11	118596650	118597183	AACCTTTAATGTTAC	801.374
chr3	138528312	138528733	AACCTTTCCGGCTGT	636.393
chr5	147588389	147588881	AACCTTTGGTTCGTC	2.56618
chr3	21171125	21171614	AACCTTTTTAAACGC	2.56618
chr19	56810697	56811093	AACGAAACATACCAG	764.144
chr3	82210344	82210850	AACGAAACCTTCTGT	559.119
chr17	86902674	86903174	AACGAAACGAGTTCT	2.56618
chr2	68306590	68307226	AACGAAACGGGGAGA	869.535
chr1	72182611	72182989	AACGAAAGACCCGCC	2.56618
chr6	119146470	119146965	AACGAAAGCAACCTT	823.863
chr5	120981693	120982150	AACGAAATACACCTT	795.077
chr15	54697712	54698183	AACGAAATGGTAACC	2.56618
chr4	98715262	98715706	AACGAAATGGTCATG	255.5
chr9	46007646	46007993	AACGAACCCCCAGTA	767.083
chr5	68541091	68541620	AACGAACCCCTTCCT	683.397
chr4	147735191	147735647	AACGAACGCTCCCAG	2.56618
chr2	94169435	94169935	AACGAACTGACCCTA	2.56618
chr6	117247822	117248361	AACGAAGAAACCACT	914.08
chr8	36274602	36275115	AACGAAGCGGGTTGG	2.56618
chr2	144345559	144346019	AACGAAGTGTTATAT	2.56618
chr17	28575387	28575969	AACGAATCACCAAGC	608.493
chr8	27208522	27209004	AACGAATGGATCTGC	570.426
chr18	65675370	65675848	AACGAATGGGGACCA	571.036
chr11	16642202	16642597	AACGAATTGGCTCTA	864.617
chr19	8958207	8958732	AACGACAAACGGCAA	824.168
chr5	147101840	147102315	AACGACAAGCTGACG	496.059
chr10	44184437	44184939	AACGACAAGTGAAAC	2.56618
chr15	88934479	88935057	AACGACAATATATGG	835.671
chr10	53057096	53057621	AACGACAATCCCCTC	2.56618
chr2	50148936	50149464	AACGACCACTGATCA	2.56618
chr2	77356835	77357382	AACGACCATGCTCTC	700.086
chr10	90415639	90415991	AACGACCCAAATACG	2.56618
chr10	92861232	92861705	AACGACCTCATTAGC	869.206
chr19	37516695	37517269	AACGACGAACAGTAG	2.56618
chr10	93531575	93532159	AACGACGATCTTAAA	2.56618
chr15	79952216	79952648	AACGACGGCGAACTT	2.56618
chr19	26839974	26840349	AACGACTCGTACACA	2.56618
chr8	125378848	125379381	AACGACTCTGCAGCA	854.738
chr11	29513081	29513492	AACGACTCTGCATCC	2.56618
chr1	172629749	172630176	AACGACTGATGGAAG	822.21
chr7	103688077	103688592	AACGAGAAACAGGGT	843.849
chr4	131607356	131607809	AACGAGACCAGTTTC	2.56618
chr5	73731029	73731394	AACGAGACGAGACCG	2.56618
chr8	121404058	121404663	AACGAGATTGCCGTG	432.669
chr15	10178893	10179381	AACGAGCCCTTTACC	607.747
chr15	31021701	31022092	AACGAGCCTGACCGA	823.883
chr6	50316453	50316856	AACGAGCCTTTACGA	2.56618
chr9	41006862	41007311	AACGAGCGCTGGTTG	877.859
chr1	90175481	90175890	AACGAGCTGGTCAAA	2.56618
chr4	53486589	53487024	AACGAGGCAACTTGG	781.569
chr8	4256839	4257251	AACGAGGCCCACAAA	1033.51
chr19	9186497	9186915	AACGAGGGTGTGTCG	555.349
chr11	98917262	98917717	AACGAGTAAGAATTA	577.019
chr7	143569450	143569885	AACGAGTATATTTTG	812.635
chr10	37627563	37628003	AACGAGTCTCACTTA	2.56618
chr16	96339809	96340382	AACGAGTTAGCGGTA	2.56618
chr4	41691617	41692081	AACGAGTTCTCATTT	988.79
chr9	79813262	79813846	AACGATACAAGCTAC	2.56618
chr9	74648803	74649286	AACGATAGGGGTACT	303.408
chr5	116895399	116895869	AACGATATCTGTGGT	2.56618
chr4	117795318	117795857	AACGATCCAAGCTAC	2.56618
chr5	142615911	142616278	AACGATCCCCTGGCT	580.669
chr14	61969728	61970171	AACGATGCCCTGCAG	688.747
chr12	100673301	100673698	AACGATGCCTCTCGC	2.56618
chr7	122610324	122610800	AACGATTACATGTGC	901.079
chr15	89205540	89205997	AACGATTCGTGCAGT	2.56618
chr5	107491391	107491767	AACGCAAAGCCTGTT	2.56618
chr9	41006682	41007052	AACGCAAATTTCATC	2.56618
chr11	118596862	118597247	AACGCAAGAAGACAT	2.56618
chr3	85001129	85001552	AACGCAAGTGCCTCA	2.56618
chr6	82701488	82701920	AACGCAATGAGCATG	864.931
chr15	11676411	11676852	AACGCACCACTATTC	811.565
chr11	6189906	6190505	AACGCACCATAGAAA	2.56618
chr4	9442126	9442614	AACGCACGTCTGTTA	2.56618
chr2	145873741	145874184	AACGCACTTACATCC	872.43
chr5	90914590	90914998	AACGCACTTGACCTA	2.56618
chr7	73424868	73425371	AACGCATTCCCATCC	2.56618
chr14	121651850	121652379	AACGCCAAATTATAA	2.56618
chr7	82443850	82444298	AACGCCACAACCGGG	2.56618
chr6	29165321	29165837	AACGCCACAATATCG	2.56618
chr1	22519143	22519718	AACGCCACACATCCG	2.56618
chr19	40261530	40262006	AACGCCATAGCCTAC	2.56618
chr1	94926165	94926534	AACGCCCACCACCCG	738.485
chr12	104873858	104874358	AACGCCCACTAGGTA	2.56618
chr3	115315509	115316166	AACGCCCCACTCACG	827.647
chr14	64319102	64319639	AACGCCCCCAGACAA	2.56618
chr16	18124228	18124653	AACGCCCCGAATTTT	2.56618
chr9	67011507	67011976	AACGCCCCGCTTCCG	565.141
chr14	66596129	66596617	AACGCCCCGGCAACC	2.56618
chr3	106975454	106975872	AACGCCCTCTCCTCA	2.56618
chr12	113828960	113829529	AACGCCCTGACTTCA	602.622
chr6	117249977	117250430	AACGCCGAACCCTCA	204.207
chr5	116895670	116896088	AACGCCGAATTTGTT	2.56618
chr11	118744505	118744910	AACGCCGAGGTCGTG	2.56618
chr19	23099073	23099621	AACGCCGCCCCGACT	454.166
chr2	50148847	50149320	AACGCCGCTCACTCT	402.904
chr1	83244783	83245232	AACGCCGCTTCATAG	2.56618
chr2	103690365	103690690	AACGCCGGCCCTACA	2.56618
chr4	102482934	102483386	AACGCCGTCTAGCCA	787.373
chr7	85535011	85535530	AACGCCGTGAAGTGA	2.56618
chr8	48869562	48870134	AACGCCTATCGCGAC	534.855
chr12	103453466	103453957	AACGCCTCCCCCACG	907.716
chr14	47235687	47236241	AACGCCTCCTTTGCA	769.951
chr7	104535012	104535426	AACGCCTCGCCGAGG	358.338
chr11	70830363	70830927	AACGCCTCGGTTCTA	2.56618
chr5	102218526	102219092	AACGCGAAACGTGGA	2.56618
chr13	21124907	21125368	AACGCGACACTGGAG	2.56618
chr5	25042491	25043135	AACGCGACCACATTT	2.56618
chr6	122458407	122458883	AACGCGACGGCTTCA	890.952
chr18	44470748	44471158	AACGCGAGCAGTATA	805.587
chr6	8308579	8309047	AACGCGATCTTAGGG	2.56618
chr11	51581712	51582157	AACGCGGTGGCCTGG	502.899
chr6	145670943	145671567	AACGCGTACGTGCAT	2.56618
chr10	77542710	77543228	AACGCGTAGTGCAAC	2.56618
chr8	37469672	37470128	AACGCGTCCACCTGA	693.884
chr12	45960328	45960835	AACGCGTGTTCTAAC	865.821
chr1	90109412	90109902	AACGCTACGCTCCTC	2.56618
chr4	81069433	81069961	AACGCTACTCAATCC	852.351
chr12	100268135	100268634	AACGCTAGAGCTGAT	453.29
chr19	31945699	31946225	AACGCTCACGGTGTA	2.56618
chr3	85202126	85202712	AACGCTCACTTCGCA	482.298
chr3	118193889	118194330	AACGCTCCGCGTTTA	2.56618
chr4	53528827	53529373	AACGCTCGCAATGCC	333.277
chr9	102178303	102178667	AACGCTCGCTCGCTT	688.351
chr5	138416059	138416465	AACGCTCGCTTTTCA	560.428
chr17	84505578	84506027	AACGCTCTCTAACTT	2.56618
chr2	153241133	153241598	AACGCTCTTGAAAGC	853.115
chr12	55483087	55483522	AACGCTGACTGCGGT	735.894
chr17	26224065	26224578	AACGCTGCATCTCCA	2.56618
chr9	25136747	25137207	AACGCTGGCACGACC	281.986
chr6	24566877	24567463	AACGCTGTACGCTGC	2.56618
chr13	24456872	24457319	AACGCTTCGACCCCC	535.219
chr9	108982867	108983412	AACGCTTCTGGGAAG	379.838
chr10	19914789	19915248	AACGCTTGTTTTTGG	434.859
chr9	49762580	49762934	AACGCTTTCTAGAAT	2.56618
chr19	23001350	23001802	AACGGAAACCCGCCT	2.56618
chr5	122149872	122150329	AACGGAAACTTTTTC	829.306
chr2	166183153	166183710	AACGGAACCCCGAGC	893.799
chr10	17996100	17996684	AACGGAAGTCGCAGA	734.84
chr1	129438143	129438559	AACGGACAACATTTA	423.439
chr19	23099447	23099963	AACGGACTAGCCTAG	593.07
chr2	154391481	154391896	AACGGAGTGTGCGCG	2.56618
chr17	8744872	8745524	AACGGATCGCAAGCA	483.038
chr17	28638949	28639475	AACGGCACAAAGAGC	2.56618
chr3	107631357	107631860	AACGGCATACCAACC	765.169
chr19	57324377	57324834	AACGGCATTGGAAGC	561.368
chr4	104510766	104511301	AACGGCCAATAAACT	863.705
chr2	179027172	179027623	AACGGCCCCAACAC	2.56618
chr17	31267927	31268560	AACGGCCCCCCCGAC	806.379
chr9	57127445	57127939	AACGGCTCAACCACG	964.99
chr12	31019069	31019642	AACGGCTCATCCAAG	840.622
chr6	49269822	49270271	AACGGGCCCGCAGCT	853.716
chr1	94926106	94926516	AACGGGCCCTTCCGG	2.56618
chr1	90109592	90110162	AACGGGCCTTATTGC	324.669
chr13	103805069	103805501	AACGGGCGAGATAGC	2.56618
chr9	96342140	96342659	AACGGGCTTGCCATG	703.69
chr3	21305888	21306369	AACGGGGATTGCGTA	636.82
chr2	6300520	6301048	AACGGGGGCTTAAGC	2.56618
chr12	99545736	99546153	AACGGGTAACTTAAA	2.56618
chr2	157888641	157889187	AACGGGTACAGCCCT	2.56618
chr3	85001169	85001564	AACGGTAATAGGCAT	864.125
chr10	53595853	53596303	AACGGTAGCACTCAA	2.56618
chr16	8604089	8604433	AACGGTAGGAGCGAT	735.196
chr7	99609249	99609670	AACGGTATCTATTTG	2.56618
chr14	28083163	28083553	AACGGTCTCTATGTT	729.045
chr5	73273470	73273986	AACGGTCTTCAATGA	2.56618
chr19	23037088	23037489	AACGGTGAAGCACCC	457.8
chr14	35477303	35477940	AACGGTGACGCCACC	704.18
chr16	24492661	24493222	AACGGTGTAAGCTCA	605.643
chr2	43325295	43325686	AACGGTTACATAATC	653.2
chr12	39764646	39765043	AACGTAAACACAGGT	2.56618
chr2	58594202	58594737	AACGTAACAATTCAC	810.761
chr10	96852790	96853178	AACGTAACTGGCCTA	2.56618
chr9	61275575	61276077	AACGTAAGTCCAATC	809.896
chr18	20218856	20219351	AACGTACACTTTAGA	2.56618
chr16	35413070	35413515	AACGTACCGTCCCGG	445.881
chr1	6809911	6810352	AACGTACCTTACGCC	510.495
chr3	107632580	107633047	AACGTACTAAGGTAT	2.56618
chr19	58470235	58470715	AACGTAGCCTATACC	2.56618
chr9	29251218	29251736	AACGTAGCGTACCCT	2.56618
chr11	78568299	78568664	AACGTAGGTAAGTAG	2.56618
chr16	37442813	37443179	AACGTATGAATTATC	2.56618
chr9	24701039	24701577	AACGTATGTCGTAGT	859.347
chr14	55585420	55585866	AACGTATTTCTGAAC	2.56618
chr11	62756976	62757455	AACGTCAACCTTATC	595.503
chr14	105759929	105760332	AACGTCAATAATTAT	750.734
chr11	5326563	5327102	AACGTCACCGGCCCA	534.614
chr5	44589139	44589660	AACGTCACGTTCACC	2.56618
chr18	60891292	60891704	AACGTCACTTATGCC	429.825
chr4	97809548	97809980	AACGTCATTAGGCCG	2.56618
chr19	37530263	37530683	AACGTCCCCAGTTCT	744.101
chr12	30709102	30709468	AACGTCCCTGCGGGC	2.56618
chr12	56498303	56498776	AACGTCCGAAAAGCC	2.56618
chr2	103690366	103690816	AACGTCCGCCCTGAC	2.56618
chr13	23896001	23896578	AACGTCCGGTTATCC	944.517
chr4	132664564	132665055	AACGTCCTGTGTCCG	639.118
chr9	42557974	42558529	AACGTCGAGCTCGGG	686.711
chr6	59401122	59401627	AACGTCGATGGTTGG	842.352
chr2	21085792	21086262	AACGTCGCGGATGTC	2.56618
chr6	23312059	23312413	AACGTCGGCATATGA	2.56618
chr2	101747726	101748244	AACGTCGTGAGATAC	2.56618
chr3	115888253	115888656	AACGTCTCTTCCGCT	718.019
chr14	47235705	47236228	AACGTGAAGTCGCCG	852.421
chr17	16011332	16011742	AACGTGACTGCATG	653.2
chr2	77635051	77635580	AACGTGAGAAGGTAG	2.56618
chr12	95659984	95660534	AACGTGATTAACCCC	2.56618
chr4	154638702	154639204	AACGTGATTTAACGC	2.56618
chr4	59331447	59331933	AACGTGCAATGTATG	2.56618
chr10	110842367	110842878	AACGTGCGTCGCCCC	2.56618
chr12	74917525	74918002	AACGTGCTGATTTCA	564.124
chr11	67495269	67495649	AACGTGGTGGTCGAC	610.019
chr2	4908962	4909422	AACGTGTACCTATGC	2.56618
chr13	100180114	100180522	AACGTGTAGTCAGGC	453.45
chr13	105752932	105753408	AACGTGTCTTAAACA	1015.05
chr2	103333950	103334392	AACGTTAACAACAAT	2.56618
chr5	90859905	90860415	AACGTTAACTCGATC	793.536
chr12	110088916	110089462	AACGTTATCAATAAC	2.56618
chr8	108928719	108929153	AACGTTCAAGTCCTT	618.577
chr12	7460728	7461233	AACGTTCGTCTCGAC	539.952
chr11	4022714	4023193	AACGTTGGAGGAGAT	2.56618
chr3	105456981	105457422	AACGTTTCAAAACAC	2.56618
chr2	35730258	35730670	AACGTTTCGATAGAC	2.56618
chr5	122959660	122960056	AACTAAACAACTCCT	2.56618
chr7	133969377	133969837	AACTAAACGTTTCCA	452.334
chr11	118597041	118597539	AACTAAATCGCTATT	2.56618
chr17	33643521	33643943	AACTAAATGGGTAAA	2.56618
chr3	38262825	38263331	AACTAACAAACCAGT	842.923
chr15	10132102	10132577	AACTAACCCATCTCT	808.844
chr17	49340697	49341092	AACTAACCCTACGAT	732.975
chr4	9442008	9442390	AACTAACGACCCTCG	2.56618
chr4	94469883	94470418	AACTAACGGCGCTTC	871.912
chr16	24390891	24391284	AACTAACTGCCGCGA	628.066
chr11	51571279	51571818	AACTAAGCGACGTAT	2.56618
chr15	10132059	10132526	AACTAATCAAAACAG	902.442
chr8	46711767	46712137	AACTAATCAAGCAAT	978.312
chr13	55292481	55292891	AACTAATCTGTCGCC	716.317
chr6	24566709	24567274	AACTAATCTTCAAAT	2.56618
chrX	130138906	130139417	AACTACAATTGCCCG	703.228
chr9	70980877	70981370	AACTACATACCAACG	2.56618
chr2	35283034	35283527	AACTACATCAAACTT	2.56618
chr2	5526459	5526997	AACTACATCTCACCT	2.56618
chr9	25381126	25381660	AACTACATGCCTTAA	798.503
chr2	164252614	164253080	AACTACATTAAATAC	774.857
chr9	50315516	50316036	AACTACCATATCCGA	2.56618
chr2	131227332	131227912	AACTACCATGGTACA	310.534
chr4	81069598	81069990	AACTACCCAACACGC	2.56618
chr1	187960478	187960914	AACTACCCACCGCCT	2.56618
chr7	75841147	75841643	AACTACCGCCGTACC	161.156
chr16	23191785	23192129	AACTACCGCTTCGCA	423.439
chr12	36352462	36352919	AACTACCTGCGCTGG	2.56618
chr13	99769205	99769828	AACTACGCTACCGAT	361.045
chr12	16431743	16432178	AACTACGGTACTTTC	777.071
chr10	70805839	70806255	AACTACTCGATATCT	2.56618
chr6	145671256	145671625	AACTACTCGTATACA	838.239
chr2	43324738	43325211	AACTACTGTCATAGA	2.56618
chr9	21788374	21788812	AACTACTTTCATACA	866.488
chr12	37995343	37995918	AACTAGAAACCTATT	310.534
chr1	172629777	172630304	AACTAGACCCCAGTT	365.965
chr9	71436935	71437385	AACTAGAGGACAACA	931.388
chr16	96339850	96340280	AACTAGAGGTAGTAG	2.56618
chr13	100324203	100324628	AACTAGAGTGGTTTC	2.56618
chr1	132575273	132575708	AACTAGAGTTCGTCT	905.975
chr5	112228465	112229027	AACTAGCCCGCGAAT	2.56618
chr14	64319122	64319489	AACTAGCTGGCACTC	806.105
chr14	103867978	103868458	AACTAGGACCGAGTT	759.387
chr6	146852268	146852790	AACTAGGCTGCAAGT	565.543
chr9	104032333	104032991	AACTAGTTAAATAC	2.56618
chr11	29513194	29513558	AACTATAAATTAACC	854.2
chr11	94900047	94900564	AACTATAACGTCAAG	831.96
chr1	196817071	196817581	AACTATCCTCATGAA	462.827
chr15	82473024	82473506	AACTATCTACAGGAG	413.806
chr9	118940901	118941310	AACTATGACCAACCG	2.56618
chr2	110154911	110155462	AACTATGATTTGGGG	869.535
chr6	91605887	91606500	AACTATGCAATAGAA	2.56618
chr4	102406788	102407231	AACTATGCCGACTTG	707.124
chr17	85092910	85093350	AACTATGCTAAACCT	901.402
chr2	94169695	94170217	AACTATGCTGCCTAC	568.402
chr4	63162113	63162418	AACTATGTGAGTCTT	456.869
chr7	75841427	75841981	AACTATTCGGTTGGC	602.685
chr2	103418010	103418482	AACTATTTCTGTTCT	2.56618
chr15	88936611	88937287	AACTCAAAACGCCCA	2.56618
chr10	16849748	16850115	AACTCAAAGCCACCA	743.525
chr11	78575412	78575819	AACTCAAATTTTCCC	907.514
chr10	98818683	98819144	AACTCAACCTGGGAG	727.802
chr7	151736099	151736428	AACTCAACTAGCAAA	919.033
chr13	43995451	43995950	AACTCAACTTGTCAT	790.55
chr6	113217062	113217658	AACTCAATCGCCGAG	2.56618
chr6	117249926	117250488	AACTCAATCTGACTG	756.579
chr17	71829694	71830138	AACTCACACAAATGC	990.087
chr17	16011425	16011850	AACTCACACTCCACT	2.56618
chr2	104422983	104423565	AACTCACCACATACA	2.56618
chr10	70806031	70806606	AACTCACCGACTCCT	725.991
chr12	80316969	80317540	AACTCACGGCGCCCT	944.517
chr9	25381298	25381756	AACTCAGAATAGCGT	642.36
chr17	46962523	46963072	AACTCAGCTGTACAC	2.56618
chr11	5325999	5326509	AACTCAGTACAGCTC	521.035
chr10	111250842	111251376	AACTCATGTTACATT	452.334
chr8	113483968	113484427	AACTCATTAAGGTCG	692.209
chr10	13555906	13556330	AACTCCAAAATGCC	568.734
chr11	98447316	98447648	AACTCCAATCGTTTT	2.56618
chr3	9821511	9821978	AACTCCACAATAGAC	968.233
chr4	141152926	141153313	AACTCCACAGGTGAA	2.56618
chr2	154391396	154391868	AACTCCACATTGCCC	2.56618
chr18	33128047	33128522	AACTCCACCACTGTT	926.384
chr10	116849555	116850022	AACTCCACCTAACGG	2.56618
chr10	19738024	19738401	AACTCCCCAGTTTAC	2.56618
chr12	40043838	40044309	AACTCCCCCAGGTGA	797.028
chr19	57340719	57341235	AACTCCCGGATAGCC	492.346
chr5	150363710	150364211	AACTCCCGGGTCTAT	1037.18
chr19	30303971	30304363	AACTCCCTCAGGAAC	607.461
chr6	145200220	145200819	AACTCCCTCGTATTA	2.56618
chr3	120953758	120954366	AACTCCCTTCACACT	2.56618
chr10	85629457	85629881	AACTCCCTTGCCTGC	2.56618
chr16	57863251	57863658	AACTCCGAAGAGGGT	344.631
chr15	101126645	101127050	AACTCCGCCAGTGTA	2.56618
chr1	172537803	172538191	AACTCCTAAGTCTTC	895.501
chr11	93078862	93079362	AACTCCTACCAGCGC	2.56618
chr13	100180263	100180729	AACTCCTGACGTAAA	2.56618
chr12	8451625	8452099	AACTCCTGTATCATA	2.56618
chr18	33321845	33322410	AACTCCTGTGAGGTA	886.65
chr1	40320413	40320932	AACTCCTTGTCCCTC	756.024
chr4	15076603	15077048	AACTCGAACCCCTAT	574.652
chr19	24274996	24275368	AACTCGATCTCATTC	423.439
chr8	80548509	80549039	AACTCGCCGATACCG	2.56618
chr4	128624043	128624457	AACTCGCGACTTTTC	2.56618
chr13	16808919	16809313	AACTCGCGGACGTAA	2.56618
chr7	151736040	151736465	AACTCGGATTCTCGC	628.994
chr1	36737571	36738024	AACTCGGCAAACAGA	2.56618
chr14	63866468	63866956	AACTCGGGTTGTGAG	803.979
chr10	74997457	74997931	AACTCGTACCGTCGA	767.774
chr2	72011910	72012437	AACTCGTCCAGGTTC	801.852
chr6	106390778	106391150	AACTCGTCTATTTGG	2.56618
chr15	31021525	31021942	AACTCGTGATGAGCC	2.56618
chr11	22645423	22645735	AACTCTAAGGAATAC	890.605
chr17	31581132	31581590	AACTCTAATCTTATA	889.173
chr11	78316504	78316946	AACTCTACCAGTAGC	788.135
chr11	61282087	61282604	AACTCTACTCCGTTA	2.56618
chr2	7163146	7163618	AACTCTAGCTCAAAG	964.575
chr5	44471615	44472221	AACTCTATCATGATT	2.56618
chr4	148721769	148722225	AACTCTATGTCTCTC	940.068
chr6	145671052	145671557	AACTCTCCCCGATTC	583.3
chr10	119365163	119365590	AACTCTCCGATATAC	979.437
chr12	13009693	13010090	AACTCTCCGTGATCC	743.993
chr18	64792518	64792913	AACTCTCGCTCTGGG	2.56618
chr11	83376058	83376521	AACTCTCGTCCGACG	735.557
chr15	30824479	30824994	AACTCTGACAACGGT	739.916
chr15	31265018	31265629	AACTCTGACACTCTC	386.375
chr2	147769887	147770275	AACTCTGCAGTAGAG	622.264
chr18	20313798	20314171	AACTCTGTAGAGTACT	619.736
chr5	140580807	140581320	AACTCTTAACGGGTC	2.56618
chr10	23431264	23431769	AACTCTTCCTCACGT	466.571
chr18	64485395	64485891	AACTCTTTTTGGTAT	314.734
chr10	69172254	69172649	AACTGAAAACCAAGT	1033.78
chr8	71426679	71427185	AACTGAAATTCTCGT	561.617
chr3	17491624	17492058	AACTGAACATTGACG	2.56618
chr9	24701552	24701923	AACTGAAGAACCGAC	414.318
chr19	56645442	56645994	AACTGACAACGATGA	2.56618
chr12	8452006	8452508	AACTGACAGTAGACC	404.994
chr2	32870157	32870646	AACTGACCCGCCCCC	493.044
chr7	108150869	108151325	AACTGACTGACCATC	655.538
chr9	23188177	23188602	AACTGACTTCTATCA	2.56618
chr8	42213106	42213420	AACTGAGGTAATTGC	523.181
chr11	35788008	35788473	AACTGAGTCATGAAT	2.56618
chr11	97468420	97468942	AACTGATAGACTTA	508.049
chr19	47481011	47481526	AACTGATAGGTTCGA	2.56618
chr11	4801991	4802356	AACTGATCACTAGCC	456.869
chr9	108982846	108983289	AACTGATCGATAAAC	396.876
chr6	98352715	98353096	AACTGATGATAGAGA	2.56618
chr4	57124856	57125204	AACTGATTGGATCAG	853.566
chr6	115416563	115416954	AACTGCAAAATACGA	687.22
chr2	94169682	94170144	AACTGCACACTATCT	2.56618
chr17	66425201	66425611	AACTGCACCGCCAAC	2.56618
chr10	53595832	53596289	AACTGCACCGTAGGT	2.56618
chr10	66550305	66550865	AACTGCACTTACTAC	891.027
chr10	13216371	13216786	AACTGCAGACCAAGG	614.72
chr14	61594501	61595065	AACTGCAGATGTATA	2.56618
chr7	108150630	108151058	AACTGCAGTTAAAAT	2.56618
chr2	94169530	94169958	AACTGCATAACTTCT	904.969
chr9	41323079	41323673	AACTGCCAACGGCCA	2.56618
chr1	108479973	108480660	AACTGCCCACTAAGC	666.042
chr18	46804292	46804762	AACTGCCCCATTTGT	677.2
chr6	8454565	8454953	AACTGCCCCTCACTG	2.56618
chr6	49269779	49270207	AACTGCCCGGACGAC	2.56618
chr10	66550180	66550689	AACTGCCGAAGCGTT	2.56618
chr1	82176929	82177283	AACTGCCGATAGCCT	365.247
chr15	34349608	34350013	AACTGCCGCCTAAAT	875.504
chr16	78268444	78268934	AACTGCCGTATGGCC	423.439
chr10	114456474	114456869	AACTGCGATAACCCT	882.626
chr2	124510059	124510480	AACTGCGCACCACCC	508.757
chr13	49006959	49007388	AACTGCGTCAAAAG	336.799
chr7	16466072	16466639	AACTGCTCACCTTAA	2.56618
chr15	42599654	42600062	AACTGCTCCCCTACC	620.963
chr9	70782253	70782688	AACTGCTCGTTTAGA	2.56618
chr18	64485404	64485834	AACTGCTTACGATGC	2.56618
chr2	65386598	65387098	AACTGCTTCCCTCCT	853.309
chr12	104146299	104146790	AACTGGAAAGCATTG	2.56618
chr12	8441033	8441426	AACTGGAAGACCTTT	937.053
chr4	6166043	6166675	AACTGGAGAATGACC	835.091
chr19	40162567	40163127	AACTGGAGGCAGCGT	675.143
chr12	103453187	103453582	AACTGGAGTCAGTTT	667.423
chr8	90192005	90192448	AACTGGCAATGTTCA	728.999
chr11	83555283	83555823	AACTGGCATTCAATC	2.56618
chr14	16925730	16926194	AACTGGCCGGCGGAG	649.379
chr14	18438663	18439110	AACTGGCGTGCTATG	296.492
chr18	75095649	75096110	AACTGGCTCACCCCT	844.56
chr4	81583432	81583785	AACTGGGAGACTCTA	673.519
chr2	143899904	143900271	AACTGGGATAGTACG	590.864
chr11	109736331	109736811	AACTGGGGTCCACTC	625.333
chr6	27981968	27982418	AACTGGTTTCACTAG	2.56618
chr1	17050268	17050904	AACTGTACGATGCCC	2.56618
chr19	58370490	58370969	AACTGTCAACACTTC	860.563
chr3	85202393	85202800	AACTGTGGCAGATCT	2.56618
chr15	10889195	10889700	AACTGTGGGGCTCGT	567.94
chr13	42790308	42790779	AACTGTTATGTGGGA	2.56618
chr5	92058527	92059032	AACTGTTGTTATCAT	2.56618
chr7	53799623	53800111	AACTTAAAATCCTCA	790.905
chr17	28104770	28105319	AACTTAACATAATCC	492.346
chr16	18124153	18124531	AACTTAAGAGTACCC	834.337
chr4	62999965	63000421	AACTTAAGGCACTGA	701.89
chr11	63904838	63905225	AACTTAATAGCCCCA	2.56618
chr18	75095166	75095691	AACTTAATTTAGTCT	758.745
chr9	56777147	56777622	AACTTACCGCAGGTT	868.239
chr4	53508158	53508598	AACTTACGCATCCCT	717.67
chr7	107810972	107811430	AACTTAGGATATCTG	513.846
chr18	56829919	56830332	AACTTAGTCTTGCAC	2.56618
chr7	128729257	128729756	AACTTAGTGATGAAG	2.56618
chr1	12761144	12761812	AACTTATCTTGTCGT	897.915
chr4	107571736	107572271	AACTTATTACTCAAG	632.077
chr15	82473143	82473525	AACTTATTGTACACC	305.725
chr4	107691834	107692340	AACTTCACATATCAT	2.56618
chr17	45735524	45735977	AACTTCATCGCATTA	2.56618
chr1	92740408	92740783	AACTTCATCGGATCC	835.091
chr12	77905947	77906508	AACTTCATGGGAAAC	2.56618
chr4	53528887	53529429	AACTTCCAACCCCCA	2.56618
chr2	69180628	69181194	AACTTCCCCCCTCTA	853.177
chr3	107632395	107632812	AACTTCCTCATATTT	868.765
chr1	72182627	72183210	AACTTCGCTATACCC	2.56618
chr7	140204349	140204883	AACTTCGGCACCCA	867.663
chr11	117284666	117285203	AACTTCGTAAGAGCA	2.56618
chr8	126185596	126186052	AACTTCGTGTATCTA	615.451
chr11	19501734	19502298	AACTTCTCCTACGAG	2.56618
chr9	24700953	24701542	AACTTGAACGGCCCA	489.941
chr4	108128838	108129248	AACTTGACATAAATC	466.571
chr7	91192899	91193301	AACTTGAGCCATTAC	469.578
chr9	56375349	56375900	AACTTGATGAGCGCT	2.56618
chr2	153241208	153241639	AACTTGATTACTAGC	350.629
chr5	31126401	31126861	AACTTGCATGGAACA	2.56618
chr5	112913819	112914368	AACTTGCCGAGGTAA	2.56618
chr1	72446956	72447340	AACTTGCTATTTTCG	434.057
chr9	53152718	53153298	AACTTGCTATTTTCT	1006.24
chr14	28673671	28674117	AACTTGGACAGGGTT	891.241
chr1	51300176	51300578	AACTTGTCGATCATC	803.226
chr19	7286440	7286983	AACTTGTGCACACGA	563.547
chr7	121433498	121434075	AACTTGTGGGGTGCT	580.194
chr9	67011403	67011816	AACTTGTTAATGGAG	2.56618
chr16	8597390	8597933	AACTTGTTGCACTGC	2.56618
chr4	154868978	154869467	AACTTTACAAGAGAC	2.56618
chr6	53168593	53169134	AACTTTACCCACGGG	2.56618
chr17	10667014	10667384	AACTTTAGCGTAATC	872.126
chr4	47621598	47621992	AACTTTCACTCCGTA	841.157
chr15	3402005	3402495	AACTTTCCACTACGT	2.56618
chr5	44588880	44589391	AACTTTCTAGCGCCG	805.447
chr7	16998213	16998707	AACTTTCTAGTGGCT	2.56618
chr1	92572665	92573124	AACTTTGATTTTTAA	2.56618
chr13	44153594	44154022	AACTTTGGATACCTT	954.212
chr16	33595387	33595815	AACTTTGTGTCGACC	311.983
chr7	149885290	149885735	AACTTTGTTAACAGG	882.719
chr4	25550238	25550742	AACTTTTCGAAATGG	585.998
chr3	121756336	121756828	AACTTTTCTAAAAGC	2.56618
chr6	145671220	145671594	AACTTTTTCTCATAT	279.882
chr11	115081237	115081622	AACTTTTTTTTATG	834.337
chr2	101489229	101489654	AAGAAAAACCTGCTT	677.264
chr9	61628288	61628677	AAGAAAAGCTCCTAA	1013.46
chr15	85926255	85926842	AAGAAAAGGGCTATA	2.56618
chr16	67125186	67125622	AAGAAAATGTGTGAG	756.008
chr9	105372586	105373153	AAGAAACGAGCTGTG	593.004
chr7	140204614	140204985	AAGAAAGGTGTAGTT	846.148
chr9	118941052	118941564	AAGAAAGTCGTGACC	393.046
chr8	90191998	90192472	AAGAAATTAGATTTC	679.769
chr15	42599942	42600326	AAGAACAGCCGAAGC	2.56618
chr14	116847678	116847985	AAGAACCCTACCTAG	2.56618
chr10	39186918	39187452	AAGAACCTTTGAGCC	711.326
chr5	54747278	54747720	AAGAACGCGATGATC	2.56618
chr11	53336520	53337004	AAGAACTAACTAAGT	1040.77
chr10	79508294	79508844	AAGAACTCCTACCTC	591.841
chr7	4083255	4083738	AAGAACTGTAGTAGT	553.213
chr4	139045784	139046326	AAGAACTTGCCTGGG	801.549
chr5	90914741	90915214	AAGAAGCTAGACCCG	2.56618
chr1	153443572	153444071	AAGAAGGCGCTGACC	706.183
chr8	13406218	13406596	AAGAAGTAGTGACAA	2.56618
chr5	149083687	149084278	AAGAAGTGGCCGCCC	2.56618
chr8	27669477	27669987	AAGAAGTTACGTTCG	815.678
chr9	29997539	29997987	AAGAATAAAAATTAT	2.56618
chr12	74984994	74985372	AAGAATAGCTTCGAA	2.56618
chr8	86950273	86950852	AAGAATAGGAATGTG	847.83
chr11	93078899	93079337	AAGAATTAGTTAGGC	2.56618
chr14	64812880	64813408	AAGAATTTCTGCTAA	816.132
chr2	27593872	27594351	AAGAATTTGAAGTCG	1030.91
chr19	41422907	41423364	AAGACAACACATAGC	880.156
chr15	12687995	12688489	AAGACACCTGCCATC	2.56618
chr8	95564769	95565229	AAGACAGAACCATAG	590.786
chr15	88934694	88935127	AAGACAGTAATACTT	995.902
chr13	44043936	44044375	AAGACATAATCCGCT	810.843
chr11	119831059	119831594	AAGACATCATACCGG	531.053
chr2	32559495	32559871	AAGACCCCACATAGG	916.709
chr2	148687343	148687797	AAGACCCCCCACCGT	2.56618
chrX	68306047	68306477	AAGACCGTGTGAGGG	833.816
chr12	8451670	8452194	AAGACCTCTCCGCAT	2.56618
chr12	104874017	104874446	AAGACCTGTCTACAG	892.678
chr4	102483019	102483438	AAGACGCCCGGAGGT	2.56618
chr2	5535429	5535887	AAGACGCTCGCTACT	467.712
chr8	3609094	3609587	AAGACGGATCTGTTC	2.56618
chr10	17445411	17445813	AAGACGTACCCAACG	2.56618
chr11	51582012	51582520	AAGACTCAGATAAAT	2.56618
chr12	80317094	80317618	AAGACTCCAATACTA	2.56618
chr1	95024813	95025208	AAGACTCTCCCCCGA	2.56618
chr16	38361773	38362231	AAGACTGACGGACTT	2.56618
chr10	89028678	89029081	AAGACTGACTCAGCC	650.628
chr16	67850418	67850940	AAGACTGCACGCACC	2.56618
chr18	65837293	65837787	AAGACTGTGTTGTCA	632.077
chr3	37450397	37450842	AAGACTTCCGTGGAG	757.389
chr12	9926979	9927410	AAGACTTTTTCTCTG	728.292
chr7	133969294	133969681	AAGAGAAACAGATAA	2.56618
chr19	29587887	29588380	AAGAGACAATCCATA	2.56618
chr9	83655068	83655492	AAGAGACTAAGAACC	1006.76
chr2	70507761	70508387	AAGAGAGCCTATGCC	2.56618
chr2	150598205	150598640	AAGAGAGTGGGGTAA	887.064
chr1	196308642	196309159	AAGAGCAATTTGCAG	2.56618
chr17	8747171	8747504	AAGAGCAGTAACTTG	2.56618
chr6	53075039	53075512	AAGAGCCTAGAGAGT	2.56618
chr16	33692072	33692493	AAGAGCGTTGTTATA	2.56618
chr2	180217658	180218243	AAGAGCTCGTCAGGG	705.637
chr16	24390535	24391116	AAGAGGAACGTTGGA	382.347
chr9	77878665	77879093	AAGAGGATCCTGATC	661.179
chr2	76210749	76211248	AAGAGGCATGTTGTC	392.297
chr12	8451615	8452105	AAGAGGCTCTATACC	771.588
chr4	99903477	99903911	AAGAGGGCAGGAAGG	735.424
chr2	109925820	109926146	AAGAGGTGTGACTTG	943.053
chr8	121403771	121404320	AAGAGTAACTCATGA	492.346
chr13	95289258	95289609	AAGAGTACTCATAAC	878.325
chr1	94926012	94926491	AAGAGTCACATGCAG	835.021
chr11	36370693	36371098	AAGAGTCATCTTTGA	2.56618
chr9	107631404	107631921	AAGAGTGATATTGAT	2.56618
chr3	107593060	107593548	AAGATAAACATTCCC	2.56618
chr11	4022827	4023265	AAGATACACAACAGA	2.56618
chr6	29226640	29227212	AAGATACCGGATTAT	1048.36
chr10	125957997	125958422	AAGATAGGGCTGTAA	783.749
chr19	21555400	21555843	AAGATAGTGATACGT	794.571
chr14	18438514	18438989	AAGATCACAGCATCT	859.645
chr7	86535207	86535574	AAGATCACCACTGAA	726.616
chr9	35101148	35101611	AAGATCCCCGGGGTC	718.3
chr2	157656436	157656915	AAGATCCGGCCACAC	2.56618
chr19	9186538	9187042	AAGATCCTAAGACGT	868.693
chr7	149317728	149318318	AAGATCGACTCATCT	2.56618
chr2	153241050	153241507	AAGATCGGTCCGGGA	2.56618
chr2	33016335	33016919	AAGATGAGGTTTAAC	2.56618
chr11	94900204	94900608	AAGATGCACGAGAAG	2.56618
chr8	128559028	128559472	AAGATGGCCTTGAGG	2.56618
chr10	16849453	16849920	AAGATTGCCTGACAC	2.56618
chr1	76115333	76115676	AAGCAAAACCAGCGC	792.706
chr4	150580445	150580959	AAGCAAACAGCGCAT	2.56618
chr19	56453264	56453665	AAGCAAAGTAAAACT	2.56618
chr2	69666074	69666555	AAGCAACAAGCTAGT	2.56618
chr1	90180917	90181522	AAGCAACCAATCTCC	2.56618
chr15	37656399	37656848	AAGCAACGATACGAC	773.671
chr2	118977933	118978403	AAGCAACGGACAATC	2.56618
chr1	151745143	151745565	AAGCAACGTGCCCTA	2.56618
chr18	12606246	12606820	AAGCAACTGGACTTC	2.56618
chr18	84119737	84120063	AAGCAATGGAATTTG	474.483
chr6	89416233	89416650	AAGCACATATGCTGC	2.56618
chr2	17605074	17605561	AAGCACCAATTGCCC	628.757
chr13	95288995	95289440	AAGCACCCATACATA	673.415
chr5	90301563	90301934	AAGCACCCCTAAGCC	756.913
chr18	64934878	64935333	AAGCACCCGCTATTT	2.56618
chr12	60207256	60207682	AAGCACCGACTCCTA	478.065
chr14	22893300	22893869	AAGCACCTCTAGGGG	2.56618
chr8	86950477	86950943	AAGCACGACCCTGAA	861.174
chr9	29997513	29998073	AAGCACTTACCTCAC	2.56618
chr11	88510384	88510891	AAGCACTTAGCGGTA	815.566
chr7	72781467	72781980	AAGCACTTATCCCTA	2.56618
chr9	96342125	96342564	AAGCACTTATTTTTT	2.56618
chr16	23191744	23192204	AAGCAGGGCGATTGG	2.56618
chr4	46965544	46966091	AAGCAGTACTGCGCA	410.784
chr6	22279410	22280022	AAGCATACCGAAGGG	2.56618
chr1	48790418	48790925	AAGCATACTAGAGCA	2.56618
chr11	57769532	57769932	AAGCATACTGACAAA	2.56618
chr8	71426716	71427140	AAGCATCAACATGAG	772.704
chr4	155065131	155065638	AAGCATCAGCGTTCA	611.138
chr6	107949137	107949614	AAGCATCGCCCTGCA	815.212
chr6	53996300	53996719	AAGCATGTCCTGTTC	502.553
chr10	67907009	67907415	AAGCATGTTACGAGT	762.758
chr19	41349827	41350331	AAGCCAACAATCAGA	2.56618
chr6	61161407	61161936	AAGCCAAGTCTATCA	774.226
chr11	103252935	103253338	AAGCCACAATGCCCA	2.56618
chr2	85121154	85121538	AAGCCACACTTTCCA	2.56618
chr10	96852733	96853126	AAGCCACATAGTCCC	791.561
chr1	133247893	133248384	AAGCCACATATTAAT	2.56618
chr19	23037102	23037623	AAGCCAGAAAGGTTG	434.057
chr6	94571138	94571617	AAGCCAGAAATGGAA	2.56618
chr4	33880479	33880857	AAGCCAGCTCAGCCT	2.56618
chr1	36629221	36629711	AAGCCATCAGCATAG	763.173
chr8	116774806	116775339	AAGCCATGTTATTAT	616.742
chr1	188223919	188224305	AAGCCCACATGTCGT	2.56618
chr15	40769260	40769708	AAGCCCAGCACGCTC	2.56618
chr7	128729305	128729820	AAGCCCATGTTCCCG	567.71
chr17	16011208	16011600	AAGCCCCACTTCAGA	746
chr18	24493720	24494218	AAGCCCCGCCATCGC	2.56618
chr6	129488708	129489178	AAGCCCCGCTCCTGG	2.56618
chr4	75113006	75113506	AAGCCCCTTTGTTCG	737.271
chr11	36957617	36958002	AAGCCCTAACTCAAT	793.832
chr2	157882647	157883068	AAGCCCTCTCCTTCC	2.56618
chr11	108826701	108827384	AAGCCCTTCATGACG	629.8
chr15	93150063	93150495	AAGCCCTTGTACGTA	2.56618
chr9	56375783	56376130	AAGCCGCAACTCTCA	431.299
chr8	107569685	107570119	AAGCCGCCAGGCATC	2.56618
chr6	18589764	18590113	AAGCCGCCCCATTTT	690.583
chr6	139826366	139826751	AAGCCGCCCTTGAGG	718.86
chr6	139795796	139796128	AAGCCGCGAACTGAG	811.797
chr8	128124282	128124810	AAGCCGGATAGGAGA	2.56618
chr5	104557330	104557779	AAGCCGGATTTAGGG	462.419
chr14	70365189	70365701	AAGCCGTCCTGCAAA	359.682
chr11	94250327	94250819	AAGCCGTTAACAAGA	2.56618
chr5	130509856	130510309	AAGCCTATAACATCA	2.56618
chr2	127963277	127963806	AAGCCTATATAAGGG	886.568
chr9	49762613	49763096	AAGCCTATGACGCAC	772.523
chr16	78268395	78268809	AAGCCTCCACGCGCC	678.671
chr12	8452055	8452569	AAGCCTCCGTAGGAT	2.56618
chr11	115081260	115081851	AAGCCTGACGTGCCC	820.339
chr11	88000547	88000995	AAGCCTGGCGCCCTT	2.56618
chr7	122610046	122610532	AAGCCTGGGAGCCAT	2.56618
chr11	3623011	3623343	AAGCCTTCTTGTCCC	819.111
chr1	120255431	120255920	AAGCCTTGCAACGTT	908.257
chr5	90989697	90990053	AAGCCTTTATAATGC	2.56618
chr1	83244795	83245326	AAGCGAACAACTTAA	502.553
chr6	122458406	122458878	AAGCGACGGAGATTT	2.56618
chr8	96395251	96395774	AAGCGACTCGTACAC	2.56618
chr1	40862181	40862535	AAGCGAGTGTCTCCT	451.231
chr4	62999520	62999959	AAGCGATACTCTCAT	490.965
chr15	85008719	85009146	AAGCGCACTGTATAA	2.56618
chr14	70422967	70423372	AAGCGCAGTCTAGCT	699.397
chr1	157655460	157655877	AAGCGCCGCCAGCCT	2.56618
chr11	104115996	104116471	AAGCGCGAATACCCC	925.384
chr3	105456727	105457139	AAGCGGAGATTTCGG	2.56618
chr10	74976166	74976572	AAGCGGCCAATATCC	2.56618
chr8	128559210	128559643	AAGCGGCTGGAGTTC	2.56618
chr6	113216861	113217305	AAGCGGCTGGTCTTG	770.265
chr18	35459482	35459920	AAGCGGCTTAGTGCG	2.56618
chr3	82843619	82844109	AAGCGGTCCACGAAA	2.56618
chr9	55192982	55193499	AAGCGTAACCTGTCT	411.014
chr5	150185124	150185571	AAGCGTAGCCCAGTT	2.56618
chr4	98714962	98715510	AAGCGTATGTAATCG	2.56618
chr16	9751052	9751593	AAGCGTTGTCGAATT	825.68
chr3	126472849	126473172	AAGCTAACCCAATGC	558.786
chr8	36996649	36997041	AAGCTAAGTTTAACA	718.474
chr4	62999581	62999997	AAGCTACAACTACAC	478.516
chr10	84426264	84426656	AAGCTACCCAGGATC	487.59
chr15	3402006	3402430	AAGCTACTTCATTCC	2.56618
chr1	90109490	90109962	AAGCTATATAAACTT	566.759
chr4	33880457	33880870	AAGCTATCACACGGC	2.56618
chr6	144999266	144999750	AAGCTATCAGTACCT	935.481
chr9	119379266	119379713	AAGCTCCATCATCCC	2.56618
chr9	24703712	24704121	AAGCTCCCCTCGAAC	555.268
chr6	18589685	18590196	AAGCTCCCGACAGAC	977.885
chr5	116895456	116895988	AAGCTCCTATGCGAC	505.864
chr11	83376058	83376478	AAGCTCCTCTCAACC	2.56618
chr4	102482636	102483180	AAGCTCTAACGAAGA	623.443
chr1	72855854	72856240	AAGCTCTGGTTTCGG	906.908
chr6	113217123	113217614	AAGCTGAGGGGAGCG	320.027
chr5	147191764	147192177	AAGCTGCACGCTTGC	2.56618
chr9	70787490	70787819	AAGCTGCCCCAGGTA	666.536
chr6	5420870	5421335	AAGCTGCTGTAGGAA	2.56618
chr2	103212795	103213307	AAGCTGGCGCTTGCA	786.522
chr4	131607152	131607649	AAGCTTACTGAACTC	877.102
chr8	85047815	85048302	AAGCTTCATTCAATC	449.058
chr13	97455336	97455819	AAGCTTGCGATCCAC	2.56618
chr11	119990431	119990837	AAGCTTGTATACTCG	754.974
chr5	151704352	151704843	AAGCTTGTGACGTAG	476.858
chr8	128559193	128559734	AAGCTTTCTAAAAGC	2.56618
chr5	147588651	147589240	AAGCTTTCTATAACC	782
chr12	113825347	113825790	AAGCTTTGCTGTTAG	525.271
chr8	128559025	128559431	AAGGAAAATGTGGCT	682.463
chr3	55247666	55248200	AAGGAAGTGCCATGT	2.56618
chr18	75095628	75096037	AAGGACCAACGACCA	1039.12
chr17	47519029	47519451	AAGGACCTGGAGAAC	2.56618
chr5	42076387	42076926	AAGGACGCTACCTCA	441.789
chr2	157888574	157889107	AAGGACGGGCAATTG	2.56618
chr10	74997492	74997920	AAGGACTTAAGTGGT	777.981
chr19	8958044	8958551	AAGGAGATTACGAGA	2.56618
chr8	18890799	18891304	AAGGAGTGGTAATCG	2.56618
chr5	138415736	138416262	AAGGATAACTTAGAC	2.56618
chr4	154638767	154639304	AAGGATCCTATCAAT	2.56618
chr1	187960790	187961238	AAGGCAAAGAGTCTT	2.56618
chr14	63866599	63867152	AAGGCAACAACGAAT	1070.84
chr10	66549838	66550409	AAGGCACCTGATCCC	2.56618
chr17	78804619	78805043	AAGGCACGAGATGCG	2.56618
chr11	89861728	89862226	AAGGCAGGGATGTTG	882.784
chr4	32657741	32658114	AAGGCATCTTGATTA	511.489
chr8	11140547	11141052	AAGGCCCCGCCTGGG	738.931
chr15	66737599	66738018	AAGGCCCCTAGTCG	769.887
chr11	114345256	114345777	AAGGCCGAGGGGCGA	619.736
chr10	22607303	22607643	AAGGCCGATCTGCTT	613.688
chr7	99412690	99413174	AAGGCCGCACATACC	2.56618
chr9	65993899	65994301	AAGGCCGGACACCTG	414.318
chr5	92058184	92058680	AAGGCCTAGGGGGTG	489.801
chr2	121376873	121377285	AAGGCCTCACCGAAA	2.56618
chr5	74208417	74208871	AAGGCCTCCCTGGGT	544.583
chr9	70513149	70513654	AAGGCCTTATTAGGG	2.56618
chr6	83653182	83653697	AAGGCCTTCCCAGAC	255.046
chr2	117854639	117855155	AAGGCGCCGGTGGGG	2.56618
chr4	6166281	6166680	AAGGCGCCTCAAGTT	434.057
chr14	63937104	63937557	AAGGCGCCTTATGGG	577.019
chr10	6535365	6535854	AAGGCGGAGCGGGAG	782.492
chr15	37656614	37657082	AAGGCGTGCGCGATG	2.56618
chr6	57463202	57463595	AAGGCGTTGGCCCTG	2.56618
chr11	114344901	114345427	AAGGCTATTGCCGCT	508.994
chr5	20789510	20789949	AAGGCTCCTATACTT	508.678
chr1	48790224	48790705	AAGGCTCGAGGTTGG	617.674
chr14	56142945	56143370	AAGGCTTCGATTGCC	677.352
chr15	66737499	66738024	AAGGCTTGATCTCCT	723.073
chr9	102178209	102178696	AAGGCTTTCAACATA	2.56618
chr8	89752443	89752852	AAGGGAAATGGAGGG	866.167
chr17	28104921	28105349	AAGGGACAAGGACCA	377.39
chr9	22875702	22876122	AAGGGAGTGGCAATA	2.56618
chr2	51144254	51144604	AAGGGATAGGAGGGG	630.337
chr7	37999207	37999689	AAGGGATCGAGGTAG	455.717
chr14	70949437	70950078	AAGGGCAAATGTACG	2.56618
chr2	131770787	131771172	AAGGGCACGGCGCGT	2.56618
chr8	71426773	71427193	AAGGGCACTAAAACT	2.56618
chr13	100180103	100180485	AAGGGCCACGCTGCT	561.835
chr4	15523049	15523536	AAGGGCGGCACCAGT	729.315
chr11	57769562	57769962	AAGGGGAGGGTTCGG	504.094
chr3	138528521	138528901	AAGGGGATATCAATG	2.56618
chr4	103058347	103058818	AAGGGGGAACGTTGT	657.372
chr10	52896003	52896447	AAGGGGGAAGGGGTC	818.848
chr3	103452530	103453004	AAGGGGGGGTCCGAC	272.644
chr11	4012108	4012471	AAGGGGGGGTTGCCC	736.443
chr13	97513040	97513495	AAGGGGTGAAGACAA	2.56618
chr7	116866708	116867137	AAGGGGTGACCAGGA	452.334
chr1	138792377	138792742	AAGGGGTTCTTCATA	2.56618
chr5	122149994	122150399	AAGGGTATTAGATCT	550.458
chr13	71807366	71807802	AAGGGTATTGCTCAG	709.791
chr7	128728950	128729606	AAGGGTCCAGGTGGA	2.56618
chr11	63664410	63664783	AAGGGTCGAATTTGT	2.56618
chr7	140659887	140660292	AAGGGTCGGAGGTGT	792.502
chr7	19926583	19927174	AAGGGTCTCCACGGA	2.56618
chr16	28402828	28403167	AAGGTAAATAGGAGG	726.815
chr2	72011780	72012247	AAGGTAAGTTAGAAG	743.01
chr4	7122570	7122989	AAGGTAATAGCTTTG	795.092
chr6	113217157	113217630	AAGGTAATAGGATAG	849.814
chr8	45775929	45776268	AAGGTACAGAATTTA	2.56618
chr2	148687515	148687963	AAGGTCATCCCTGAA	2.56618
chr6	54074475	54074926	AAGGTCATGAAGTAA	474.483
chr5	103020246	103020730	AAGGTCCAGCCTTTT	2.56618
chr5	103020435	103020820	AAGGTCCATTGGTG	337.158
chr15	89205471	89205911	AAGGTGAACCGTGAA	799.173
chr1	90109799	90110379	AAGGTGACAATAGCC	775.333
chr8	71426789	71427257	AAGGTGAGGTCGGGA	471.779
chr9	28425384	28425763	AAGGTGCCGGGAGTC	892.287
chr8	60016976	60017462	AAGGTGCGGCTAAGT	557.398
chr18	33321648	33322126	AAGGTGTACACTTTG	863.765
chr4	57124910	57125464	AAGGTTACGGGCCTT	287.303
chr5	51920622	51921022	AAGGTTAGTGGTTGC	593.263
chr16	31647324	31647828	AAGGTTCCACCAACT	710.924
chr11	106684036	106684594	AAGGTTCGCGGCCCC	2.56618
chr12	82076944	82077593	AAGGTTCGTATGGTA	2.56618
chr4	102483122	102483591	AAGGTTGTCTCTCTC	2.56618
chr5	68440120	68440461	AAGGTTTGTTCTCTG	647.518
chr14	70938348	70938865	AAGTAAAACTCAGTC	788.39
chr5	72826288	72826664	AAGTAAAATAGAGAC	605.643
chr8	36468931	36469398	AAGTAAACATGTGTA	2.56618
chr5	116976018	116976521	AAGTAAACTTATGGG	2.56618
chr9	41007008	41007403	AAGTAAATATAACCA	553.008
chr4	103058415	103058884	AAGTAAGCGGTTCCT	2.56618
chr8	46324520	46324925	AAGTAAGGGTATTAG	2.56618
chr5	114128650	114129237	AAGTAATAACGGATA	992.18
chr7	58477256	58477654	AAGTAATCAAGGCC	2.56618
chr5	104557036	104557614	AAGTAATGCTGAGAT	502.553
chr13	94423520	94423941	AAGTAATTCATCCTC	2.56618
chr11	70200549	70201100	AAGTACACATAACGG	2.56618
chr18	67376447	67376944	AAGTACAGAGCTGGA	890.722
chr1	107360564	107360927	AAGTACGACAACCTC	396.876
chr9	110665689	110666150	AAGTACTGAGCTTGG	896.831
chr14	12505561	12506006	AAGTACTTCATAGTT	583.46
chr12	8441169	8441540	AAGTAGACCCCTATA	418.511
chr2	69180749	69181318	AAGTAGAGTGCTTGC	750.734
chr14	70609853	70610374	AAGTAGCGATGAGAG	867.349
chr13	97512862	97513250	AAGTAGGCACTTAGT	2.56618
chr5	21992649	21993071	AAGTAGGTGTAGAGT	2.56618
chr6	72065079	72065560	AAGTAGTGTACGTGG	509.599
chr2	57991244	57991659	AAGTAGTTTTCTCAT	815.729
chr12	114251013	114251567	AAGTATATTGACTTT	2.56618
chr1	196308967	196309327	AAGTATCATCTGTTC	2.56618
chr11	70200724	70201278	AAGTATCGCCAGCAT	325.214
chr8	63154292	63154703	AAGTATCTTGACTCA	754.618
chr9	121811163	121811598	AAGTATTCCGACCAA	2.56618
chr6	97241634	97242088	AAGTATTTATTCGTT	2.56618
chr7	4473935	4474456	AAGTCAAGTGTACGA	794.913
chr18	50158230	50158779	AAGTCACCTCCAGTT	2.56618
chr2	35282919	35283330	AAGTCAGGTTCGGCG	916.359
chr7	81062898	81063342	AAGTCATTCGCACAA	703.69
chr8	37469711	37470141	AAGTCATTCTACAAA	2.56618
chr3	21171111	21171548	AAGTCCAGCGTATGG	618.289
chr4	155065046	155065513	AAGTCCAGGGTTACT	862.882
chr9	77693568	77694104	AAGTCCAGGTTGTCG	2.56618
chr3	58105275	58105883	AAGTCCCAATATGGG	2.56618
chr5	52741821	52742254	AAGTCCGGTCGAAAA	679.065
chr12	74882439	74883031	AAGTCCGGTCTAAGT	767.117
chr18	60891347	60891727	AAGTCCGTCACGGGG	767.331
chr7	4083556	4083929	AAGTCCGTTCACCGA	807.525
chr9	56777312	56777911	AAGTCCTTTTGTATA	413.806
chr5	90301586	90302091	AAGTCGAAAGTATTA	2.56618
chr19	44475339	44475700	AAGTCGAGACAGTAC	2.56618
chr11	114345209	114345736	AAGTCGAGTGCGATA	843.122
chr2	35729999	35730535	AAGTCGCCGTCTTGA	2.56618
chr1	133584780	133585282	AAGTCGCTATTTATG	2.56618
chr11	98917436	98917843	AAGTCGGTCGAGTCC	325.432
chr13	104060762	104061180	AAGTCGTTGGTCGAA	282.29
chr1	92740194	92740633	AAGTCTCTGTTCCCT	988.383
[truncated: 36,827 more rows]

## Sheet: HiSeq_cortex_2
track name="HiSeq_cortex_2" description="Cortex_replicate_2" useScore=1 visibility=squish
chr3	37709504	37710146	AAAAAAAAATCAATC	2.56618
chr10	70805960	70806410	AAAAAAACCTACAAT	591.225
chr12	100673230	100673624	AAAAAAAGCACTTTT	2.56618
chr5	54341379	54341917	AAAAAAAGGACACAT	2.56618
chr15	82784225	82784760	AAAAAAATCAATCGT	2.56618
chr18	64510206	64510708	AAAAAACATTATGTC	926.059
chr15	79640287	79640806	AAAAAACGTGTAAAT	658.34
chr3	14863875	14864271	AAAAAAGAGCACCAT	708.149
chr9	29997583	29998082	AAAAAAGCCTGCTAT	740.742
chr9	96341942	96342530	AAAAAAGCTAAATAC	328.362
chr15	31265244	31265740	AAAAAAGGTGATGAT	2.56618
chr17	25589196	25589730	AAAAAAGTCACATG	685.707
chr19	23560733	23561238	AAAAAAGTCTCAGTA	882.796
chr1	179538829	179539288	AAAAAAGTGGACACC	382.477
chr2	124348189	124348615	AAAAAATAAGCCGCT	803.414
chr8	128123918	128124528	AAAAACACAGCTATT	661.486
chr17	24340777	24341209	AAAAACAGGCAGGA	705.37
chr5	119787581	119788007	AAAAACATAGCTCAA	2.56618
chr2	5594942	5595333	AAAAACATGTCTGGA	715.052
chr11	89861773	89862301	AAAAACATTCAACCA	878.216
chr3	107507443	107508036	AAAAACCAAGTTTAC	2.56618
chr8	18890630	18891215	AAAAACCTCCCCGTC	870.935
chr1	80400513	80400914	AAAAACGCCATGGAC	685.07
chr10	87129460	87129996	AAAAACGCTCTGACA	631.641
chr4	128076181	128076650	AAAAACGCTTGACAG	2.56618
chr2	90663915	90664412	AAAAACTAGTTGTGG	817.88
chr1	196404185	196404588	AAAAAGATATAAGTG	523.867
chr2	50148879	50149344	AAAAAGCAAATGGGT	2.56618
chr10	13216063	13216413	AAAAAGCCTTTTGA	857.299
chr9	30090618	30091219	AAAAAGCGTCCTAAA	648.346
chr8	107990539	107991020	AAAAAGGGTAGGTGG	2.56618
chr15	34264859	34265391	AAAAAGGTATCTTGT	654.4
chr4	57124959	57125238	AAAAAGGTGATTACC	712.129
chr4	53426555	53427169	AAAAAGTGCCTGACG	693.456
chr2	180435932	180436377	AAAAATAAGCCAGTC	2.56618
chr5	44588971	44589382	AAAAATAGCCACATG	270.936
chr7	149317651	149318112	AAAAATAGTGGTGAG	2.56618
chr6	86725670	86726148	AAAAATCATATGAAA	667.412
chr5	146832553	146832996	AAAAATGATTTGACC	825.333
chr13	46508876	46509322	AAAAATGCTCACGCT	618.678
chr8	67100721	67101200	AAAAATGGCTGCTAG	506.982
chr2	103212651	103213172	AAAAATTTGTAAGC	747.793
chr19	30261678	30262110	AAAACAACCGCTAGA	567.533
chr6	115188645	115189032	AAAACAACGATCAAT	2.56618
chr5	22717999	22718391	AAAACAAGGAAGCGT	525.394
chr16	96339673	96340069	AAAACACTTCTTTAC	775.543
chr13	100180312	100180779	AAAACAGCGCCTAGA	2.56618
chr11	83375796	83376275	AAAACAGCTCGAACC	573.196
chr4	47657977	47658539	AAAACAGGCTCGATT	2.56618
chr2	5526811	5527266	AAAACATAGGAACCC	2.56618
chr14	106152244	106152780	AAAACATCACCCCAT	2.56618
chr2	131770869	131771394	AAAACCAGGTCATCC	626.303
chr4	148252786	148253432	AAAACCATTCCTGCG	474.964
chr11	113517798	113518181	AAAACCCAACCACAC	2.56618
chr17	84392136	84392614	AAAACCCAGATACAC	2.56618
chr12	36819654	36820106	AAAACCCAGTGTGCC	952.051
chr6	49270968	49271487	AAAACCCTATGCCGT	2.56618
chr5	25042646	25043226	AAAACCGATCTGTGT	833.708
chr11	6852712	6853229	AAAACCTAAGTGTGA	669.581
chr6	115884014	115884489	AAAACCTATTGACCT	2.56618
chr3	115315736	115316216	AAAACGAAATACACA	383.594
chr3	37450217	37450604	AAAACGACACCAGAA	442.376
chr1	76547359	76547963	AAAACGACCGATCAT	2.56618
chr13	9074816	9075251	AAAACGACTATGGAA	583.146
chr14	62906204	62906666	AAAACGAGATTAAAT	403.694
chr8	42239095	42239570	AAAACGCGATTGCAT	2.56618
chr4	94405540	94406010	AAAACGGCCACAGAC	2.56618
chr6	117963531	117963974	AAAACGGGCGTTAAT	922.194
chr1	107805300	107805640	AAAACGGGCTGTGGA	2.56618
chr13	35107845	35108265	AAAACGTCCGGGTCT	1048.69
chr8	26532037	26532464	AAAACTATACCTCCA	360.581
chr11	5326406	5326792	AAAACTATGCCGCGT	826.131
chr1	83491578	83492092	AAAACTATGTAAGGG	2.56618
chr6	119130115	119130537	AAAACTATTCTTACG	393.925
chr14	35448879	35449266	AAAACTCTTCATACT	2.56618
chr13	112646383	112646840	AAAACTGTGCAGGCT	2.56618
chr11	33236653	33237078	AAAACTGTTGATCGT	2.56618
chr15	82473280	82473728	AAAACTTCCCCCGGG	2.56618
chr8	128558968	128559429	AAAACTTTTCAATCG	866.445
chr17	16011372	16011787	AAAAGAAATCTAGCT	699.67
chr13	94459478	94459895	AAAAGAACAAGGTAG	2.56618
chr13	44548586	44549031	AAAAGAACCACACA	353.041
chr14	121651772	121652130	AAAAGAAGGATGTGA	732.234
chr2	156111158	156111571	AAAAGAATAAGGGAT	2.56618
chr4	90905448	90905890	AAAAGACACACCGAT	774.445
chr12	26876555	26877012	AAAAGACGAATCACC	2.56618
chr19	8479911	8480331	AAAAGACGGGAAGTG	755.987
chr15	66844912	66845347	AAAAGACGTAATTTC	2.56618
chr8	60017318	60017757	AAAAGAGATTTCCTG	523.098
chr11	116995411	116995865	AAAAGAGTGCTATCG	2.56618
chr5	24561055	24561576	AAAAGATAACTACGG	590.223
chr10	13768319	13768788	AAAAGATCCGCTGAG	557.635
chr8	95349550	95350052	AAAAGATGGAAGTCT	2.56618
chr4	141827459	141827905	AAAAGATTATACGAA	2.56618
chr5	140580782	140581184	AAAAGCAAGCTGAGC	742.296
chr5	131177800	131178185	AAAAGCGGACGTTGG	328.751
chr6	72176890	72177352	AAAAGCTCGAGATCA	2.56618
chr5	146832582	146833062	AAAAGCTGCTTGTGC	525.902
chr15	102998037	102998455	AAAAGGAGACAGCTA	2.56618
chr14	70365109	70365587	AAAAGGCCAGAGTCC	516.894
chr15	86305394	86305882	AAAAGGCCTACTCGA	2.56618
chr2	35730166	35730758	AAAAGGCGGCTCTCC	2.56618
chr19	30261776	30262236	AAAAGGGACTATGTG	806.377
chr14	61594490	61594936	AAAAGGGGGCCCCGG	1005.5
chr11	61282111	61282519	AAAAGGTAGTTTCAT	2.56618
chr7	54169809	54170214	AAAAGTACACACCTG	980.012
chr8	120191299	120191729	AAAAGTGTACGATAC	397.4
chr5	150185205	150185619	AAAAGTTCATCCCCA	745.998
chr10	38525938	38526333	AAAAGTTCTCGGTT	209.684
chr6	137661712	137662316	AAAAGTTGAGCTCAT	837.141
chr1	94926058	94926707	AAAAGTTGCCCTTGG	2.56618
chr2	104422999	104423536	AAAAGTTGCGTTTCG	558.895
chr5	73034857	73035343	AAAATAAAACCTTCT	780.962
chr5	146832561	146832967	AAAATAAAGGCTAAA	2.56618
chr14	34847189	34847791	AAAATAAGGATTCTC	525.394
chr13	44309618	44310079	AAAATACGAAGGCCT	742.296
chr2	153789107	153789451	AAAATAGATATTTGG	2.56618
chr13	32772006	32772387	AAAATAGTCAATAC	2.56618
chr13	95289363	95289923	AAAATATCAGGGTAT	843.799
chr3	103452249	103452711	AAAATCACGAGAGTG	2.56618
chr18	51290231	51290672	AAAATCACTGACCGA	865.471
chr1	136674554	136674971	AAAATCACTGATTCT	462.736
chr11	51571053	51571527	AAAATCATTTCATCG	551.475
chr19	27396635	27397153	AAAATCCAACGCGTA	509.386
chr3	19544121	19544598	AAAATCCCAGCCCCC	296.406
chr10	53595658	53596144	AAAATCCCCCTTACA	2.56618
chr17	12571172	12571619	AAAATCCGTTTGATT	715.688
chr15	95599088	95599648	AAAATCGCAGATGAG	862.648
chr9	56777438	56777870	AAAATCTCAGGGTTC	2.56618
chr12	99545699	99546162	AAAATCTGCTCATGG	2.56618
chr1	94925856	94926448	AAAATGCATCCGGTA	948.314
chr10	118236761	118237188	AAAATGGGTTTTTCA	842.06
chr16	26706385	26706963	AAAATGGTTATGAAC	2.56618
chr13	69776918	69777438	AAAATGTTGCTAAGA	595.268
chr13	120128390	120128868	AAAATTAAAAACACG	872.118
chr9	32778857	32779346	AAAATTAAGCCGAAA	531.744
chr18	46766943	46767453	AAAATTAGTGGAAGT	2.56618
chr6	49270038	49270475	AAAATTCTAGTTTGA	2.56618
chr1	76100792	76101132	AAAATTGATCATTAG	530.42
chr1	177361537	177361966	AAAATTGCCTCACTC	905.113
chr5	39610866	39611369	AAAATTGGATATCGG	2.56618
chr14	121651518	121652081	AAAATTTCGGCCTTG	299.955
chr1	166182577	166183024	AAAATTTGATAGGCT	870.438
chr4	15523342	15523890	AAAATTTGCGCTATC	674.163
chr6	112748207	112748721	AAAATTTGTACCACC	844.943
chr7	53799914	53800360	AAACAAAATAGCACA	403.694
chr4	98321140	98321668	AAACAAACAGCTCTA	569.708
chr8	129332405	129332854	AAACAAACCATCATT	819.792
chr5	77610516	77610981	AAACAAAGATGTTAG	2.56618
chr16	45768266	45768600	AAACAACAATTTATG	2.56618
chr11	7052295	7052756	AAACAACCGTGCTAA	760.609
chr16	96346416	96346798	AAACAACTGCCTATG	642.343
chr8	23576349	23576739	AAACAAGCATTCACG	2.56618
chr11	7092756	7093162	AAACAAGCGTTTTGT	1019.75
chr13	97512835	97513205	AAACAAGTAAGGATG	783.073
chr17	32827980	32828367	AAACAATAACAACGT	635.547
chr16	67124899	67125318	AAACAATCTCGCCCC	2.56618
chr9	105372491	105372982	AAACAATCTGTCTTA	468.411
chr15	52931053	52931530	AAACACAACTGAGCC	808.281
chr13	13580007	13580391	AAACACACGCCCAGA	444.631
chr18	64485413	64485870	AAACACATACTTTCG	594.585
chr19	23037001	23037580	AAACACATTCCGATC	2.56618
chr15	85008272	85008879	AAACACCGCGCTCGG	2.56618
chr7	53799753	53800225	AAACACCTGGGGTCT	845.59
chr9	110364874	110365435	AAACACGCACCAACT	1025.48
chr1	107805150	107805622	AAACACGCCGATATT	393.925
chr1	41616092	41616559	AAACACGTCATTCCT	2.56618
chr5	38613873	38614258	AAACACTGGGTAGCC	2.56618
chr4	132782044	132782550	AAACAGACACCGACA	500.456
chr10	56834401	56834867	AAACAGACTTACGGC	381.372
chr17	84235488	84235972	AAACAGAGACTTGGT	340.208
chr10	98818749	98819299	AAACAGATACATCCT	755.096
chr3	37450559	37450955	AAACAGCATCTCATA	2.56618
chr4	104943923	104944431	AAACAGCCGACTACC	614.148
chr2	43324833	43325314	AAACAGCCGATGACT	689.584
chr3	14864146	14864537	AAACAGCTGCTTAAA	2.56618
chr9	65993792	65994304	AAACAGGCCTACTTT	669.279
chr11	35118821	35119189	AAACAGGGCTATAAA	677.703
chr10	19738214	19738610	AAACAGTCGACCGAT	792.092
chr13	51267879	51268304	AAACAGTTTCTTCAC	747.965
chr9	102178375	102178791	AAACATACTTTTTTT	642.694
chr17	16011364	16012015	AAACATAGACAAGTT	495.006
chr7	26429490	26429948	AAACATCACCGTCAA	466.255
chr17	85131771	85132166	AAACATCCTGGTCTA	644.083
chr6	112748651	112749037	AAACATCGCTAAATG	401.664
chr17	28575117	28575603	AAACATCTACCCGAT	2.56618
chr14	47811609	47812114	AAACATCTGCACACA	510.769
chr2	4956375	4956739	AAACATGAATTGTCT	776.3
chr11	85835866	85836286	AAACATGCCTTGGGT	535.592
chr11	22645402	22645869	AAACATTACCAGATC	459.638
chr4	117544025	117544456	AAACATTAGAATGGT	257.643
chr6	72098711	72099127	AAACATTTGCCTCTT	2.56618
chr3	131015144	131015536	AAACCAACATCACCA	2.56618
chr2	146085427	146085852	AAACCAAGACGTCCT	935.02
chr2	181313408	181313820	AAACCACCTTATTCA	411.128
chr3	130973306	130973687	AAACCACTAAAGCTC	2.56618
chr11	6799171	6799726	AAACCAGCCTCGCAT	424.232
chr1	90150105	90150609	AAACCAGTCGGGTTC	778.609
chr6	145200385	145200906	AAACCATACTCAACT	654.181
chr3	102474007	102474456	AAACCCAACCTGTAA	604.856
chr2	26175014	26175416	AAACCCAACTGAAGT	701.175
chr8	109358843	109359419	AAACCCACGGGAGGC	2.56618
chr18	39550458	39550826	AAACCCAGAGTCATC	883.364
chr8	125378888	125379418	AAACCCAGGTCGGTT	828.368
chr11	94899839	94900337	AAACCCAGTGCTCGT	2.56618
chr11	63691779	63692337	AAACCCCAGCAGCCG	2.56618
chr2	156452323	156452725	AAACCCCCACTTATC	759.462
chr11	94899947	94900270	AAACCCCCTCCCTGC	874.759
chr8	107569843	107570329	AAACCCCGAATACTT	508.033
chr5	39610990	39611460	AAACCCCGAGCAGCC	899.49
chr18	45730281	45730679	AAACCCCTCTCTAAG	807.646
chr13	12221171	12221611	AAACCCCTGGCCCCA	680.438
chr10	74997455	74997915	AAACCCCTTGTGATG	2.56618
chr19	23099052	23099488	AAACCCGAATAGAGA	860.39
chr15	12679578	12680068	AAACCCTCAAAGCGA	2.56618
chr18	12961176	12961680	AAACCCTCACCGAGC	730.155
chr1	132598614	132599081	AAACCGAAGCCCGTG	619.75
chr5	31947413	31947820	AAACCGCCCTTAAG	2.56618
chr4	155064910	155065310	AAACCGCCGACAATG	2.56618
chr8	128558867	128559294	AAACCGCGTTGTGCA	417.957
chr2	103687155	103687621	AAACCGGCAGATAGA	662.759
chr1	182437608	182438074	AAACCTACCGGGCGA	595.592
chr18	16915810	16916238	AAACCTACGTTCTAG	2.56618
chr9	24700763	24701260	AAACCTAGAACTCCT	772.104
chr4	47657915	47658425	AAACCTCCATAGCCA	2.56618
chr12	80316924	80317408	AAACCTCGTGCTGCA	724.851
chr17	84292350	84292896	AAACCTGAATCTAAC	2.56618
chr11	16642483	16642991	AAACCTGAGTTAGAC	575.543
chr6	30122840	30123306	AAACCTTCGCTTACC	688.3
chr9	61677009	61677571	AAACGAACAAAGCT	2.56618
chr6	18589902	18590293	AAACGAACACCTCGA	2.56618
chr9	75275188	75275575	AAACGAAGTTTCAGG	845.669
chr4	107692029	107692555	AAACGAATTACCCCT	2.56618
chr8	67100393	67100839	AAACGACCAGAGGTT	2.56618
chr7	74232432	74232837	AAACGAGAGCATCGT	2.56618
chr3	107506994	107507432	AAACGAGAGTAAATG	2.56618
chr15	30824823	30825456	AAACGATCGATATTC	691.222
chr2	65496726	65497198	AAACGCACCAAATGC	2.56618
chr5	65731033	65731542	AAACGCAGGCCCAGA	758.921
chr15	82473180	82473555	AAACGCCCACAATAC	2.56618
chr3	59857923	59858385	AAACGCCCACGTAAT	428.192
chr13	34721258	34721791	AAACGCCCACGTTCT	2.56618
chr1	48790451	48790769	AAACGCCCCTAACAG	2.56618
chr9	13402141	13402600	AAACGCCCTGACCAC	2.56618
chr11	19501347	19501735	AAACGCCGGGGAGTT	594.39
chr13	104144524	104145144	AAACGCGAATTAGAG	2.56618
chr18	32077981	32078457	AAACGCGATTTTTAG	2.56618
chr17	86902466	86902873	AAACGCGGAATCGAT	345.26
chr2	14783872	14784315	AAACGCGTAAGAAAC	833.092
chr11	89962508	89962958	AAACGCTACGAAATG	806.925
chr18	69826418	69826847	AAACGCTCACATGCT	716.033
chr5	34612070	34612658	AAACGCTGCCGGGGG	861.139
chr19	53864209	53864619	AAACGCTTGCACTAG	889.233
chr5	30474712	30475090	AAACGGAAACGGCAT	2.56618
chr14	102314876	102315258	AAACGGAGGCTTGAC	2.56618
chr2	159533826	159534294	AAACGGCTCTAGCGA	385.292
chr13	34057795	34058144	AAACGGGTTTTACAT	814.149
chr13	34721620	34722159	AAACGGGTTTTAGCA	584.915
chr4	98320951	98321459	AAACGGTACACTCGG	504.4
chr13	59659054	59659549	AAACGGTCGACACCC	2.56618
chr8	41754727	41755168	AAACGGTTAGTGGCA	2.56618
chr1	194211371	194211918	AAACGTACCACAAGC	364.923
chr6	137661746	137662246	AAACGTAGCTGGACT	690.141
chr10	90062512	90062938	AAACGTAGGGCGTGG	331.318
chr2	77528527	77528910	AAACGTAGTGGTGGC	2.56618
chr2	145873368	145873723	AAACGTCAACAACAC	532.439
chr16	8597690	8598059	AAACGTGTCCCCCAC	2.56618
chr7	112748345	112748837	AAACGTTATTGCCGG	596.128
chr12	87988903	87989449	AAACTAAATTCATCT	862.455
chr8	14850342	14850790	AAACTAACCAAGTCG	2.56618
chr6	85799016	85799444	AAACTAATTCATGAT	2.56618
chr8	42220160	42220676	AAACTAATTCTACCA	809.849
chr10	123283728	123284171	AAACTACATCCCGGC	851.91
chr4	99903490	99903941	AAACTACCACATACA	644.457
chr5	89119669	89120238	AAACTACCACTTAGC	2.56618
chr4	147478098	147478572	AAACTACGATCACTC	336.802
chr11	51571006	51571564	AAACTACGCAGCCAA	842.316
chr13	37717840	37718247	AAACTATATAGGACC	835.443
chr1	177361348	177361760	AAACTCACACTACAT	762.629
chr2	119884695	119885163	AAACTCACGCGTAAA	525.031
chr12	103448849	103449267	AAACTCAGCATCGAT	423.081
chr12	77532386	77532840	AAACTCAGGGAGTTA	518.953
chr6	72064761	72065374	AAACTCATAGCGTCC	2.56618
chrX	7184034	7184522	AAACTCCGCTATCAT	815.133
chr1	74768255	74768708	AAACTCCGGGTTCAC	749.884
chr15	88934954	88935527	AAACTCGGATCCTCC	703.26
chr3	81230674	81231042	AAACTCGTGCCACAT	2.56618
chr18	43020524	43021067	AAACTCGTTGTCGCG	2.56618
chr17	45745119	45745479	AAACTCTATAAGTAC	2.56618
chr4	154868858	154869247	AAACTCTCCATGGGC	2.56618
chr13	43229787	43230283	AAACTGAACGAAACA	2.56618
chr5	38613922	38614302	AAACTGAGCGTGTTA	2.56618
chr13	44309617	44310058	AAACTGCGGCTCCCA	2.56618
chr14	12695635	12696173	AAACTGGTAACCAAT	2.56618
chr18	24872220	24872871	AAACTGGTCACGGAC	240.245
chr8	11292459	11292934	AAACTTAAGAGGTTG	490.473
chr1	34186682	34187229	AAACTTACACAAGAG	2.56618
chr9	33741703	33742183	AAACTTCAGCCCGCT	2.56618
chr15	51195118	51195518	AAACTTCGGGCACCA	2.56618
chr13	95289005	95289451	AAACTTCTACAACTA	2.56618
chr1	95024902	95025319	AAAGAAACAGTGCCT	663.807
chr11	117284610	117284954	AAAGAAACCCAAATA	451.975
chr6	115416563	115416943	AAAGAAACGGCTTTC	2.56618
chr2	143899837	143900348	AAAGAAATTACTACC	856.208
chr8	67137691	67138241	AAAGAACTCCCCCCG	658.018
chr19	14333552	14333898	AAAGAACTCTCACAC	2.56618
chr16	49896139	49896569	AAAGAACTGTATATG	2.56618
chr11	35788306	35788722	AAAGAAGCGGATCTT	642.907
chr5	138517453	138517833	AAAGAAGGCCGATCA	2.56618
chr17	25589612	25590132	AAAGAAGTCCGGAAC	2.56618
chr11	109783613	109784026	AAAGAATCAATACCT	739.346
chr12	74918043	74918561	AAAGACACGTGCGCA	981.38
chr14	70938404	70938823	AAAGACATGTACTAG	2.56618
chr5	31126315	31126863	AAAGACCGCGATACG	517.275
chr4	114206374	114206797	AAAGACCTACTGTCC	649.921
chr13	92998165	92998738	AAAGACGGAGTGCGT	763.132
chr9	98180629	98181085	AAAGACGTGTCGGAA	2.56618
chr1	90109630	90110007	AAAGACTGTAAAAAG	2.56618
chr2	90663918	90664430	AAAGAGACATGACCC	891.279
chr16	57863113	57863578	AAAGAGCATGAGGCA	655.533
chr11	65057021	65057506	AAAGAGGCGAATTAA	2.56618
chr4	33880305	33880758	AAAGAGGTCCTATTC	461.335
chr5	150185177	150185547	AAAGAGTCCATAAGA	447.715
chr14	47235860	47236406	AAAGAGTGAATAAGC	2.56618
chr4	33976978	33977379	AAAGAGTGTGATAAT	611.318
chr10	86514172	86514776	AAAGATAACACATTG	771.769
chr7	56034528	56034959	AAAGATACTCTGCAG	539.114
chr14	12695553	12695969	AAAGATAGATAGAGG	327.396
chr11	80051946	80052337	AAAGATATTTGGTAT	2.56618
chr7	151735955	151736408	AAAGATCTGAGACCA	2.56618
chr17	85137696	85138131	AAAGATGCATTGGTT	2.56618
chr3	10127558	10128002	AAAGATTCCAAAATT	998.129
chr5	118492834	118493413	AAAGATTGAACCAGG	566.738
chr4	131554367	131554956	AAAGATTGGTAACGG	2.56618
chr4	148929135	148929504	AAAGCAAACATCTCT	2.56618
chr13	46509049	46509417	AAAGCAACCAGTCTC	635.983
chr13	56651754	56652296	AAAGCAACCATGCTG	850.335
chr8	26415887	26416284	AAAGCAACGGGCCCG	2.56618
chr1	136463940	136464402	AAAGCAATCTCTACT	2.56618
chr5	34611930	34612382	AAAGCACATATACTT	2.56618
chr16	23996304	23996795	AAAGCACCCTCAGAA	2.56618
chr5	37284691	37285132	AAAGCAGAAACCTTA	2.56618
chr17	25589350	25589839	AAAGCAGACTAGCGA	2.56618
chr18	45730114	45730604	AAAGCAGCCGTAGCG	569.3
chr11	29513347	29513836	AAAGCATACGTGCAT	619.153
chr5	112913971	112914378	AAAGCATATGTAGCG	735.313
chr15	80109120	80109539	AAAGCATATGTTATT	856.817
chr7	106883171	106883721	AAAGCATCCTTCCTC	2.56618
chr15	12679603	12680176	AAAGCATCGCTCAGC	732.537
chr14	103867835	103868303	AAAGCATCGTTCGAG	677.703
chr15	45285505	45285882	AAAGCATGAGAAACC	611.683
chr7	56034186	56034759	AAAGCATGCTTAAGT	2.56618
chr18	64911135	64911524	AAAGCCAATTCTTTT	752.598
chr11	98447177	98447709	AAAGCCATCTGTGGA	842.621
chr9	25136573	25137059	AAAGCCCCGAAACAA	535.266
chr6	145293241	145293700	AAAGCCCGAGAATGA	945.038
chr14	64611057	64611614	AAAGCCCGATCGCAC	2.56618
chr6	71475586	71475943	AAAGCCCTCGAAGAT	760.086
chr11	94250236	94250744	AAAGCCGCTACAAGG	1007.42
chr6	91584911	91585334	AAAGCCTAGCCTCCT	2.56618
chr11	111741300	111741739	AAAGCCTATTCCCCA	738.04
chr16	76787092	76787496	AAAGCCTGGTAGTGC	2.56618
chr5	150185260	150185729	AAAGCCTTAATCACC	323.626
chr9	67396686	67397151	AAAGCCTTATGTTTA	2.56618
chr1	136674594	136675060	AAAGCGAACGCGTTT	2.56618
chr14	64612443	64612778	AAAGCGACACAATTA	2.56618
chr12	90941279	90941700	AAAGCGACGAAAGGG	1046.9
chr1	132575037	132575481	AAAGCGCACGGGGGT	2.56618
chr13	15390174	15390630	AAAGCGGGCTCTGAG	2.56618
chr2	119884618	119885106	AAAGCGGTCTACCAT	726.359
chr3	33888169	33888592	AAAGCGTCATACTTC	2.56618
chr18	44715508	44715942	AAAGCTACGGATTGA	2.56618
chr14	41909438	41909970	AAAGCTAGCATAAAC	863.415
chr1	72447174	72447627	AAAGCTCAGATAGAC	371.435
chr16	28402662	28403124	AAAGCTTAAGCTACT	626.344
chr18	69280985	69281372	AAAGCTTCCTCCCTC	566.38
chr7	74232567	74233154	AAAGGAAAACAGACT	571.591
chr11	51581886	51582291	AAAGGACTCAAGTGG	461.05
chr2	129628371	129628797	AAAGGAGCGACTCTC	2.56618
chr6	107949380	107949891	AAAGGCAACAAGATT	752.836
chr13	95289261	95289782	AAAGGCCACACAGTT	2.56618
chr12	56498359	56498847	AAAGGCCCATTTTTG	435.888
chr8	41755142	41755592	AAAGGCGCACAGAAG	637.594
chr3	14864034	14864454	AAAGGGCACAAACCA	2.56618
chr5	101266739	101267216	AAAGGGTGCGTGGGA	540.4
chr7	51880975	51881386	AAAGGGTGGATCAAT	919.858
chr15	72694436	72694965	AAAGGGTGGGGCGGT	2.56618
chr10	77549376	77549878	AAAGGGTGTGGAGAG	921.866
chr18	16915852	16916489	AAAGGTAATTCCAAG	2.56618
chr1	196817130	196817753	AAAGGTACTCCCATG	567.687
chr13	102785023	102785553	AAAGGTAGGGGGGAG	921.322
chr10	86514344	86514801	AAAGGTAGGTTGAGG	752.304
chr5	125055051	125055538	AAAGGTCAATAATTC	417.957
chr9	108039660	108040143	AAAGGTCTTTATAAC	679.649
chr7	26429789	26430127	AAAGGTGACTAACAG	289.682
chr9	20624294	20624714	AAAGGTGCTCTCATT	823.594
chr12	35756082	35756612	AAAGGTTCGGTACGC	478.4
chr6	71149445	71150083	AAAGGTTTCACTACA	186.21
chr8	128558874	128559306	AAAGGTTTCACTGAA	987.201
chr15	30824916	30825294	AAAGGTTTTCCCCGT	789.591
chr7	100130398	100130944	AAAGTAAAAGGATCA	2.56618
chr5	128026668	128027148	AAAGTAACATGACGA	2.56618
chr14	67976470	67976926	AAAGTAACCTGGGAG	856.382
chr7	147903043	147903560	AAAGTAATTTTGTTG	428.797
chr11	6853031	6853532	AAAGTACTAAACAGA	945.429
chr15	97961374	97961782	AAAGTAGAACCATGA	608.61
chr16	19969405	19969890	AAAGTAGTACGGGTG	2.56618
chr4	102406827	102407186	AAAGTATACAGGAAA	700.645
chr6	119146338	119146756	AAAGTATCCTCACCT	523.209
chr19	41226942	41227421	AAAGTATCTCGTAGC	2.56618
chr11	78815419	78815838	AAAGTATCTTTGGCA	835.938
chr6	67099383	67100005	AAAGTCACATCATGA	560.153
chr5	53934468	53934903	AAAGTCACTCTGATA	2.56618
chr13	41339577	41340115	AAAGTCCGTCAATAA	799.868
chr13	41339728	41340244	AAAGTCGCAGTTCCA	2.56618
chr3	55247704	55248135	AAAGTCTACGATCCC	2.56618
chr6	53168529	53169134	AAAGTCTTCTGTTTC	924.082
chr11	115081164	115081613	AAAGTGACGGTTGCT	659.895
chr12	81899225	81899628	AAAGTGAGGACTGTT	509.898
chr17	27570053	27570720	AAAGTGGCTAAGGGG	2.56618
chr4	53528790	53529198	AAAGTGTTACTCATA	2.56618
chr4	148290410	148290778	AAAGTTATTTTATAG	477.704
chr6	100306571	100307016	AAAGTTCCGTTCTAA	344.115
chr12	37995177	37995649	AAAGTTGAGGGTGAC	507.865
chr12	81899320	81899820	AAAGTTGAGTACCA	658.712
chr9	59797784	59798423	AAAGTTGATACATCG	579.858
chr6	115878645	115879075	AAAGTTTCTATGACG	2.56618
chr1	177361579	177362056	AAAGTTTGCTGCCCT	509.898
chr12	8451850	8452283	AAAGTTTTAACACAG	2.56618
chr6	42309193	42309629	AAATAAATATCGCTC	291.319
chr5	120981708	120982161	AAATAACCCCTCCCG	2.56618
chr9	28491433	28492018	AAATAACGGACAATC	2.56618
chr6	51031147	51031582	AAATAACTCAACAGT	661.325
chr4	55674993	55675394	AAATAAGAAAGGGTG	748.727
chr5	34611989	34612515	AAATAAGCTTTCATG	873.107
chr16	96346355	96346804	AAATAAGTTTAAGCC	942.054
chr8	27669782	27670314	AAATAATACCTGCCT	364.225
chr1	48790097	48790711	AAATAATGCTAAGCG	2.56618
chr6	142470265	142470722	AAATACAATATCGTC	454.171
chr9	74504234	74504703	AAATACACATTAACA	686.123
chr17	47062824	47063258	AAATACACCAAGCCG	2.56618
chr4	88539168	88539598	AAATACAGACAGACC	834
chr2	34958851	34959407	AAATACGAACGATAC	755.182
chr12	8441167	8441579	AAATACGAAGATTAC	1081.22
chr15	57543762	57544270	AAATACGCCTACATT	602.914
chr6	94570728	94571168	AAATACTCCGCAGTC	2.56618
chr16	41872200	41872709	AAATACTTACCACTG	784.921
chr16	48331875	48332359	AAATAGAGCCTTGTC	756.347
chr8	116614347	116614851	AAATAGCACGATCTG	646.646
chr9	24724173	24724639	AAATAGCGTTCTGAT	2.56618
chr2	77528467	77528800	AAATAGGAAGGCTCT	726.014
chr16	35413084	35413532	AAATAGGAATTACTT	2.56618
chr4	108916936	108917341	AAATAGGCGACGACA	2.56618
chr4	117486658	117487070	AAATAGGTCGACCTA	2.56618
chr7	16460792	16461234	AAATAGGTCGGGAGG	733.544
chr1	28271070	28271402	AAATAGTGTCATTCC	291.87
chr11	83375864	83376345	AAATAGTTCGGCTGA	2.56618
chr4	150471145	150471682	AAATATAACGCTAGC	2.56618
chr1	151519187	151519566	AAATATACAGCTTAT	775.531
chr18	66389330	66389834	AAATATAGACATTTT	2.56618
chr16	95980984	95981375	AAATATAGGTGGGAT	508.496
chr7	134942178	134942653	AAATATCATCAGTTT	2.56618
chr7	147942226	147942802	AAATATGAGATGTAC	653.252
chr2	103333968	103334381	AAATATGGCCGATTT	828.588
chr14	56143614	56144126	AAATCAAGTGCGTTG	262.825
chr5	92058292	92058865	AAATCACCAGTCCCT	382.093
chr15	7348595	7349182	AAATCACCCCTTTAT	2.56618
chr10	92861246	92861754	AAATCACTACCTTAA	2.56618
chr11	42568267	42568781	AAATCATGATTTTCG	2.56618
chr18	57833367	57833871	AAATCATTCTGATCA	462.842
chr7	53799817	53800322	AAATCCGAAATGTGA	714.954
chr1	151745170	151745640	AAATCCGACCAAAAT	2.56618
chr14	8832669	8833223	AAATCCGCTCGTATC	644.687
chr11	117197157	117197712	AAATCCGTGACTGTT	2.56618
chr5	66453446	66453899	AAATCCTATACAGTG	534.079
chr1	53835278	53835612	AAATCCTGCCTGGTG	774.859
chr11	44761948	44762488	AAATCGAATACGCAG	734.755
chr5	30879646	30880201	AAATCGACACTACAG	669.06
chr15	86404594	86405112	AAATCGCAATCCAGG	164.132
chr6	35824768	35825250	AAATCGCACCATTTC	2.56618
chr8	107990846	107991379	AAATCGCTGGCCAGT	590.622
chr8	128124169	128124651	AAATCGGCCTGCGTC	765.92
chr2	157882695	157883067	AAATCGGGTATATG	809.669
chr2	135397183	135397722	AAATCGTATCCACGT	633.393
chr8	70372524	70373067	AAATCGTCGGTGACC	875.679
chr2	77356641	77357137	AAATCGTGATTCACT	761.628
chr17	63665064	63665409	AAATCTACTAACGAA	919.03
chr7	52075507	52075906	AAATCTCCAAACGAC	2.56618
chr9	96342273	96342679	AAATCTGCTACCTCA	721.505
chr8	73917025	73917522	AAATCTTAGCCGTGA	494.192
chr3	114632569	114633008	AAATGAAACCTTATC	2.56618
chr19	56645675	56646123	AAATGAAATAGAAGT	311.473
chr14	70422727	70423257	AAATGAAATTATGAC	954.921
chr3	59858059	59858511	AAATGAACGAAATAG	2.56618
chr11	120313404	120313772	AAATGAAGCCTTATT	800.269
chr14	47235810	47236156	AAATGAATCTCTGCC	379.673
chr14	76408987	76409470	AAATGACCTACATCA	2.56618
chr13	12430071	12430591	AAATGACGTTGCAC	829.268
chr15	85926642	85927055	AAATGAGCATCTCAA	2.56618
chr15	7139612	7140117	AAATGATCTCCTATT	2.56618
chr17	25858418	25858911	AAATGATTCCGGCGG	2.56618
chr17	75922015	75922474	AAATGCAAGCTTATT	846.517
chr6	34605918	34606325	AAATGCCAGTTGTGG	625.649
chr10	13215894	13216299	AAATGCCGCCACCCA	949.047
chr14	22893298	22893676	AAATGCGGTCCAGAC	2.56618
chr8	73916986	73917562	AAATGGATGGCTACA	318.23
chr11	67495113	67495686	AAATGGCGTTCCTGT	614.369
chr3	82811428	82811898	AAATGGCTAGTAACA	515.2
chr2	54918188	54918615	AAATGGGAATTACTC	2.56618
chr2	72589150	72589695	AAATGGGCTAGGGAT	621.549
chr4	32332571	32333039	AAATGGTATGTTACT	781.084
chr11	31563302	31563693	AAATGGTTCCGGGAG	2.56618
chr2	25327957	25328406	AAATGTATCAGGAAG	851.022
chr5	125054978	125055596	AAATGTCCGTCTACT	164.558
chr14	79519097	79519554	AAATGTCCTTAAGCG	280.716
chr1	82165538	82166071	AAATGTCGCATAGTT	654.385
chr9	74172039	74172522	AAATGTGCGATGTAA	2.56618
chr14	65060273	65060717	AAATGTGTAAAGTGG	781.6
chr8	85047858	85048264	AAATGTGTTCCATAA	2.56618
chr19	40406263	40406717	AAATGTTGCATAGGG	2.56618
chr5	31947305	31947814	AAATGTTTGTACTAA	516.693
chr4	117486159	117486755	AAATTAAGCCCTGTC	2.56618
chr16	40228615	40229016	AAATTAAGTACTCAC	507.113
chr11	62756990	62757618	AAATTACACCGGTAT	665.508
chr5	96966123	96966593	AAATTACGTGGTATC	774.783
chr6	134110599	134111233	AAATTAGTATTAACG	2.56618
chr13	102820279	102820872	AAATTAGTTGATGGG	531.168
chr17	71829963	71830398	AAATTATAGTGGTGA	364.225
chr15	101856713	101857131	AAATTATTTCCATGC	775.32
chr15	7118190	7118657	AAATTCAAGTTCGTA	542.678
chr2	131227353	131227944	AAATTCACAGATCCC	527.001
chr11	108689632	108690000	AAATTCACTCCACGG	877.222
chr3	95017480	95017937	AAATTCATCAGCCAT	361.479
chr15	76031179	76031594	AAATTCCAACTTAAC	652.538
chr12	25364892	25365218	AAATTCCCCCGACGT	807.994
chr17	66425255	66425670	AAATTCCCTCACCGT	673.129
chr1	43314733	43315224	AAATTCGAGCTTAAT	2.56618
chr9	62923023	62923431	AAATTCGTAAGGTAG	2.56618
chr18	64485615	64486025	AAATTGAATTTGAAT	518.717
chr18	39391754	39392208	AAATTGATAGTAGGA	2.56618
chr18	64935116	64935526	AAATTGATGGCGGAT	2.56618
chr8	37469652	37470145	AAATTGCACGAGATT	458.707
chr18	49871115	49871522	AAATTGCACTTTGTC	2.56618
chr15	37656464	37656929	AAATTGCCATCTTTT	887.793
chr10	97066036	97066318	AAATTGCCTAGCTCC	2.56618
chr5	90914675	90915122	AAATTGGACGCATCT	665.117
chr10	97066036	97066502	AAATTGGGGGTACAC	2.56618
chr11	61281924	61282409	AAATTGGTAGGCTTT	591.946
chr13	37717762	37718250	AAATTGTCCCTAAAG	447.715
chr17	45745275	45745680	AAATTGTGCCTTTGA	609.393
chr6	29038202	29038596	AAATTGTTCTGGGTA	433.812
chr5	123140504	123140987	AAATTGTTGAACCGG	457.867
chr15	73553156	73553709	AAATTGTTTGTGAGG	572.264
chr11	75606945	75607426	AAATTTAAGTCCTAC	2.56618
chr1	51939953	51940413	AAATTTAGATACATC	690.945
chr2	79283059	79283600	AAATTTATGTCGATC	732.524
chr2	59365097	59365600	AAATTTCACATGGCT	692.278
chr7	128729105	128729515	AAATTTGACAGTGCT	808.269
chr17	47518871	47519321	AAATTTGACAGTTAA	396.76
chr5	108018779	108019272	AAATTTGATGCGACT	2.56618
chr9	105737834	105738290	AAATTTGCGCGTACT	2.56618
chr6	57463971	57464359	AAATTTGCGTCTAGT	886.397
chr14	70938500	70938932	AAATTTGTCTATTCC	908.773
chr1	12761415	12761920	AAATTTGTTTCTAGG	2.56618
chr11	113788448	113788887	AAATTTTGATAAACC	1054.7
chr1	179405855	179406524	AAATTTTGGCTCTTC	645.071
chr12	53572346	53572935	AAATTTTTAGCCATA	827.545
chr11	113788534	113789002	AACAAAACATATGTA	962.399
chr2	4858754	4859245	AACAAAACGCCAATG	675.142
chr10	79508272	79508750	AACAAAACTCACAG	2.56618
chr12	101771382	101771776	AACAAAAGCCTGACT	1007.16
chr14	61642900	61643262	AACAAAAGGCTCAGA	666.162
chr6	22279156	22279686	AACAAAATCGCTTAC	2.56618
chr7	15108120	15108664	AACAAACAATCTTTG	586.305
chr3	116487049	116487477	AACAAACACCCCATA	2.56618
chr16	78309403	78309848	AACAAACCGGAAAGG	730.592
chr6	117963560	117964071	AACAAACCGTATTGC	2.56618
chr7	81062990	81063429	AACAAACGCATCCCT	2.56618
chr2	85053872	85054339	AACAAATACTCGCCC	1078.07
chr9	46066967	46067474	AACAAATCCCGCACG	2.56618
chr18	38939516	38939919	AACAAATCCTTAGAG	2.56618
chr12	56498656	56499191	AACAACAAACGTGAT	943.963
chr9	113086066	113086467	AACAACAACCCTAAC	641.996
chr19	8957862	8958403	AACAACAACGTTTTA	273.626
chr8	97739679	97740186	AACAACACTGTTCGT	2.56618
chr1	172629479	172629913	AACAACATACGTACA	863.753
chr13	100180310	100180878	AACAACATGTATAGG	2.56618
chr9	69012280	69012755	AACAACATTTTTACG	2.56618
chr9	67397080	67397514	AACAACCATATGATT	489.607
chr1	58201056	58201457	AACAACCATTCCATC	847.466
chr12	86288709	86289154	AACAACCCATAGAAC	2.56618
chr16	9993794	9994298	AACAACCCGACCCCT	1018.77
chr19	56810674	56811139	AACAACCCTCGTAAA	940.833
chr9	48016574	48017040	AACAACCTAAACCCC	406.815
chr11	50520761	50521149	AACAACGAAGGCATA	2.56618
chr9	29251269	29251785	AACAACGGAACTAC	570.732
chr7	99606243	99606780	AACAACGTGCGCGGA	2.56618
chr1	41616135	41616554	AACAACGTGGCCGGA	786.129
chr11	119831234	119831674	AACAACTACAACGTG	2.56618
chr12	8441242	8441594	AACAACTAGGGCTCA	2.56618
chr6	145200506	145200925	AACAACTAGTCAAAA	796.927
chr1	153443560	153444197	AACAACTCAGACCGA	223.573
chr9	119541274	119541638	AACAACTCCCTCACA	617.581
chr10	74967022	74967502	AACAACTCCTCGGGA	636.208
chr2	35927048	35927557	AACAACTGTTTAACT	545.794
chr8	128124362	128124786	AACAAGAAAGCGAAA	2.56618
chr6	75552617	75553078	AACAAGAAGCCGCCT	637.402
chr18	30553729	30554339	AACAAGAGACGGATC	709.038
chr15	88934813	88935166	AACAAGAGACTGGTT	866.309
chr9	29251243	29251692	AACAAGATCTCAAGC	2.56618
chr17	28064460	28064950	AACAAGATGCCTGCC	810.343
chr6	137661714	137662234	AACAAGCCACCCACA	2.56618
chr11	51582008	51582485	AACAAGCGAATCGCA	630.657
chr17	85081851	85082444	AACAAGCGCACTCGA	2.56618
chr15	66014313	66014858	AACAAGCGTGGCGTT	2.56618
chr14	56143068	56143483	AACAAGGAAGCCCGA	322.249
chr13	16373640	16374062	AACAAGGACCCATTA	2.56618
chr6	85799313	85799669	AACAAGGGAGTTTCG	529.083
chr4	120563535	120564076	AACAAGGTACTGTGC	2.56618
chr7	107810800	107811180	AACAAGTACTTCACC	2.56618
chr13	99769234	99769633	AACAAGTCTGAAGGC	2.56618
chr10	94824069	94824601	AACAAGTGTTGCGAG	2.56618
chr6	122458586	122459026	AACAAGTTATGAACA	586.508
chr14	70938318	70938907	AACAATACACATTGA	2.56618
chr4	97809572	97810028	AACAATACACGGACT	756.869
chr9	86595152	86595523	AACAATACCCAAATC	2.56618
chr9	61275790	61276291	AACAATAGAGTTATT	809.479
chr12	31019334	31019920	AACAATATACCTGCG	642.88
chr13	96007261	96007678	AACAATATCGCTCGG	2.56618
chr15	11676314	11676750	AACAATATTCACGCT	2.56618
chr17	67207978	67208532	AACAATCAAATCAGC	2.56618
chr7	85431631	85432018	AACAATCAACGCTGA	2.56618
chr12	74984804	74985457	AACAATCCACGATCT	2.56618
chr15	12688160	12688487	AACAATCCGACTACA	573.14
chr7	133969594	133970199	AACAATCCGGACACT	657.592
chr3	58104777	58105284	AACAATCTATCTTCT	941.507
chr12	53035308	53035775	AACAATCTGTGAGGC	2.56618
chr1	185924337	185924817	AACAATGAAATCCTA	2.56618
chr7	74232451	74233033	AACAATGCAGACAAG	999.625
chr1	51940197	51940659	AACAATTAGTAACTT	320.891
chr13	69776963	69777331	AACAATTATTGTAAC	2.56618
chr3	105457058	105457517	AACAATTTCCATTCA	2.56618
chr10	16849458	16849918	AACAATTTGGGGTGT	586.305
chr7	149317660	149318138	AACACAAAGCGGACT	773.756
chr2	124857737	124858175	AACACAAAGTTCATC	607.648
chr5	89119965	89120393	AACACAACTTGGACT	2.56618
chr5	66630375	66630831	AACACAATACGTTAT	633.424
chr2	5534907	5535546	AACACACAATTTAGT	538.908
chr1	196404458	196404891	AACACACACACAACC	2.56618
chr10	41306795	41307420	AACACACACGGTGTA	2.56618
chr10	84426360	84426802	AACACACACTAACCT	969.167
chr8	37469754	37470250	AACACACCGCTCAAT	824.784
chr5	39520068	39520502	AACACACGTACCCGG	970.026
chr2	91555184	91555554	AACACACGTCCGAGT	2.56618
chr18	30553971	30554371	AACACACGTCTCACA	906.601
chr10	92861096	92861546	AACACAGACAAACAC	2.56618
chr2	18139179	18139667	AACACAGATGCAACT	665.754
chr12	81605817	81606239	AACACAGGGTAGGAA	2.56618
chr7	109086126	109086697	AACACAGTCTAACAG	2.56618
chr2	101747611	101748159	AACACATAACTACCC	2.56618
chr9	74504151	74504736	AACACATAATAGAGC	2.56618
chr14	24313538	24314136	AACACATACTAGATG	631.957
chr10	24668248	24668711	AACACATAGTATCAT	2.56618
chr10	18861107	18861524	AACACATCATCAGGA	302.894
chr1	137490493	137490997	AACACATCCACAATG	2.56618
chr5	27707521	27707951	AACACATCCCAGGAC	2.56618
chr19	56645728	56646218	AACACATCCTAACTC	2.56618
chr16	37789671	37790222	AACACATCGGTACGA	2.56618
chr5	90301628	90302091	AACACATCTCTGTAA	722.474
chr6	35824574	35824968	AACACATGGAGTCTT	2.56618
chr7	70652950	70653376	AACACATTCGAAGCG	2.56618
chr12	8451603	8452060	AACACATTGGGTAAT	2.56618
chr17	34864608	34865112	AACACCAAACAGATT	420.336
chr6	82701474	82702140	AACACCACAATCATT	2.56618
chr8	127905300	127905866	AACACCAGCCCTGCA	2.56618
chr13	97858348	97858725	AACACCAGGCCTCTC	638.529
chr4	47720593	47721045	AACACCAGTGTACTT	769.77
chr12	105641982	105642403	AACACCATCAACGCT	759.517
chr6	137661768	137662268	AACACCCCCCCCTCC	867.362
chr2	59439070	59439446	AACACCCCCGGCGGA	1014.89
chr9	62922803	62923294	AACACCCGCTCCAGT	2.56618
chr13	120128696	120129097	AACACCCGTTTTGCA	829.242
chr15	80108908	80109375	AACACCCTACGGTCC	1109.18
chr1	76100909	76101334	AACACCCTAGTGCTG	676.963
chr11	19501566	19502102	AACACCGATACCTGT	606.465
chr11	70200639	70201230	AACACCGCCTTTAGT	570.045
chr7	85534946	85535394	AACACCGTCACAACC	400.665
chr10	8488500	8488873	AACACCGTGCCTTTT	760.828
chr7	31907738	31908261	AACACCTAACGGCCT	2.56618
chr11	100268550	100268977	AACACCTACAAAAAC	2.56618
chr2	71873465	71874125	AACACCTCGTTATCT	2.56618
chr9	83654827	83655344	AACACCTCTCGCCCA	2.56618
chr12	74985024	74985432	AACACCTGGCGAATG	2.56618
chr17	47062888	47063264	AACACCTTATACGGA	2.56618
chr2	26175185	26175588	AACACGAAAGCAGCC	546.322
chr5	125317015	125317591	AACACGAAATACTAG	866.482
chr18	33725697	33726135	AACACGACACCCTAA	2.56618
chr2	75268265	75268688	AACACGACTTTCATC	2.56618
chr6	35312475	35313001	AACACGAGACCCCAG	686.812
chr8	95565006	95565469	AACACGAGTTTCGCA	2.56618
chr9	29148979	29149387	AACACGCAACAACAT	787.719
chr13	41339485	41339962	AACACGCAATTCCCT	645.381
chr5	125316924	125317266	AACACGCCAGGGAGA	473.287
chr7	87517239	87517552	AACACGCCCGTTTGG	850.272
chr14	121651621	121652199	AACACGCCGACCTTA	2.56618
chr12	113829097	113829756	AACACGGACTCCGAC	798.495
chr1	76547502	76547954	AACACGGAGCTTCGT	417.287
chr19	14333685	14334027	AACACGGCAGAGTGG	453.204
chr3	5450514	5451152	AACACGGCTGCACGT	2.56618
chr9	24701274	24701697	AACACGGGAACACTT	2.56618
chr5	125316871	125317313	AACACGGGATCCATA	2.56618
chr7	73340686	73341106	AACACGTACAGATTC	922.294
chr5	130509689	130510182	AACACGTCTAGGAAA	737.987
chr12	55482929	55483384	AACACGTCTCATCAC	898.254
chr15	12679688	12680150	AACACGTGTCATTGT	483.553
chr12	7460695	7461079	AACACGTTAGTTTCC	717.775
chr9	71437124	71437578	AACACTAACCTGAAT	2.56618
chr5	96965905	96966390	AACACTAGGCTACGC	488.366
chr10	24668249	24668754	AACACTAGTGGATGG	857.62
chr12	113829043	113829447	AACACTAGTTGCGTT	865.74
chr4	53152459	53152984	AACACTATACATAAC	939.056
chr10	24191165	24191689	AACACTCAACTGTAG	580.353
chr7	75841419	75841839	AACACTCAATTAAAC	455.287
chr2	6300700	6301026	AACACTCACAAGGAT	794.043
chr19	29587990	29588384	AACACTCACCCTGAC	2.56618
chr12	45655701	45656124	AACACTCACGCTTCC	2.56618
chr2	77635307	77635740	AACACTCCACTTACA	564.771
chr12	31019263	31019741	AACACTCCCCTGAGT	2.56618
chr18	66129665	66130262	AACACTCCCGTTCCT	830.517
chr3	28040745	28041158	AACACTCGTCATCCG	471.637
chr1	92572776	92573353	AACACTCTTACAATA	669.894
chr15	80109109	80109623	AACACTCTTCGATGA	887.574
chr5	116976052	116976478	AACACTGAAAATCCT	434.961
chr2	3407289	3407698	AACACTGCCCATGTA	2.56618
chr6	139795789	139796180	AACACTGCGCACCAT	2.56618
chr3	118193852	118194424	AACACTGCTTCTGAC	884.872
chr9	96727661	96728124	AACACTGTTTCCCTA	2.56618
chr3	95896061	95896674	AACACTTACTAGTTA	2.56618
chr12	10521087	10521427	AACACTTCAACCGTC	502.081
chr8	42212932	42213430	AACACTTGCGGCCTA	2.56618
chr16	24090066	24090527	AACAGAAACCTGCAG	2.56618
chr1	136674504	136675005	AACAGAAAGATATTG	429.124
chr18	25007068	25007463	AACAGAAAGCTTAAC	2.56618
chr13	41339573	41340116	AACAGAAAGGAGACG	566.38
chr5	66453503	66454002	AACAGAAAGGGATTG	633.937
chr16	23996521	23997034	AACAGAACAACGTTC	2.56618
chr9	77666670	77667176	AACAGAACATTGGAT	710.48
chr1	189273102	189273523	AACAGAACGAGCGAA	2.56618
chr2	180435766	180436276	AACAGAAGCATTACT	2.56618
chr4	6166270	6166682	AACAGAAGGCTGGTA	282.102
chr11	80051856	80052316	AACAGAATGTGCATT	819.922
chr9	64661955	64662424	AACAGAATTTGATCG	2.56618
chr13	42790285	42790896	AACAGACCGGCTCGG	172.545
chr10	23431325	23431936	AACAGACGGATGATA	2.56618
chr8	120191226	120191674	AACAGACGGATTTAT	2.56618
chr6	113217002	113217516	AACAGAGAATCTACA	760.831
chr11	75726350	75726791	AACAGAGACGCTACA	769.017
chr6	145293191	145293803	AACAGAGATCAAAGG	2.56618
chr2	112356690	112357087	AACAGAGCCTGCCCA	768.651
chr14	75550419	75550926	AACAGAGGATATGAT	2.56618
chr15	12144906	12145431	AACAGAGGGAGGGAT	936.885
chr10	79508649	79509206	AACAGAGTAAGCGTG	676.596
chr8	95565035	95565379	AACAGATAAAAACAT	365.626
chr1	84446177	84446624	AACAGATAACGGACC	743.308
chr15	85825061	85825499	AACAGATCAGGCTTT	886.536
chr10	118236698	118237162	AACAGATGCAGCATT	2.56618
chr6	139857474	139857916	AACAGATTGCAGTGG	2.56618
chr12	10521105	10521585	AACAGATTTCCATCC	505.838
chr12	31019182	31019666	AACAGCACCCCCTGT	780.083
chr2	130744552	130745007	AACAGCACCCTACAG	311.473
chr13	41339912	41340340	AACAGCAGCTTGTGA	2.56618
chr8	41700757	41701184	AACAGCAGTCGTTCT	533.49
chr15	80109026	80109389	AACAGCCACTTGGGC	2.56618
chr1	172255517	172255881	AACAGCCATCAATTT	533.686
chr10	87129635	87130080	AACAGCCATGGGTAG	287.755
chr10	41959452	41959884	AACAGCCCACCCGGG	800.621
chr14	28083026	28083468	AACAGCCCCACCGAC	805.429
chr12	112479945	112480436	AACAGCCTAAACCAT	605.007
chr4	150471036	150471644	AACAGCCTCACGCCC	2.56618
chr3	19900873	19901312	AACAGCGCCAACCCC	862.967
chr5	31126294	31126708	AACAGCGCGCTCGAC	2.56618
chr2	124857584	124858156	AACAGCGTTAACAAT	2.56618
chr12	86288794	86289242	AACAGCTGCACTCGC	2.56618
chr9	108983099	108983584	AACAGCTGCCCTTGC	2.56618
chr2	163225192	163225618	AACAGCTGTACTATC	2.56618
chr17	85131916	85132333	AACAGCTTGTTTCGC	2.56618
chr9	100371560	100372107	AACAGGACAAGAGCC	2.56618
chr14	106152105	106152617	AACAGGACCACAAAC	629.246
chr5	68439913	68440343	AACAGGCATCAACCA	773.318
chr16	89991900	89992400	AACAGGCCTCGGCTT	408.949
chr8	37469586	37469997	AACAGGCTTACAAGA	2.56618
chr11	53336597	53337059	AACAGGGATCTATTA	359.468
chr19	17387122	17387638	AACAGGGGCTCCACG	2.56618
chr10	38525824	38526383	AACAGGGTCATTTAC	605.283
chr13	49006661	49007071	AACAGGTATCGCAAT	2.56618
chr10	65644146	65644685	AACAGGTCACACTTG	395.333
chr19	23560503	23560924	AACAGGTCAGAAAGC	729.099
chr10	89028506	89029072	AACAGTACCCGCTCG	452.616
chr11	57746411	57746934	AACAGTACTAAGGTA	2.56618
chr7	51728478	51728993	AACAGTACTGGGGTA	2.56618
chr11	80914408	80914820	AACAGTCAAACAAAT	755.857
chr2	91016187	91016767	AACAGTCAAACCGAG	2.56618
chr18	20219090	20219653	AACAGTCCTAGGTAG	717.933
chr8	46347242	46347726	AACAGTCTACGAGAC	849.619
chr3	81779404	81779833	AACAGTGCCGCTCTG	2.56618
chr6	24566434	24566997	AACAGTGCGACTATC	2.56618
chr19	37516948	37517519	AACAGTGCGCAGCGG	387.602
chr1	138863485	138864073	AACAGTTGCATAGC	2.56618
chr18	64510152	64510569	AACAGTTGTCCCATA	2.56618
chr1	167351420	167351882	AACAGTTTGCATTGT	2.56618
chr7	90899557	90900025	AACAGTTTTCTGTCT	2.56618
chr11	100891616	100892127	AACATAAATTAGAGT	2.56618
chr3	63243917	63244264	AACATAACAAGCGGC	2.56618
chr6	121255551	121255984	AACATACACCGCGTG	803.414
chr4	47621343	47621799	AACATACACCTACGC	867.408
chr9	67011387	67011981	AACATACACGATTAC	2.56618
chr4	32332653	32333151	AACATACAGTTCGTG	2.56618
chr1	177361181	177361671	AACATAGAAACACGA	576.592
chr11	63691796	63692286	AACATAGACTAGCTA	848.113
chr8	47968800	47969358	AACATAGCTAGCGTC	667.79
chr15	82626433	82626951	AACATAGCTCCCTCA	883.958
chr3	107593156	107593559	AACATAGGGTCGGAG	2.56618
chr4	97809598	97810036	AACATAGTGCACGGC	804.071
chr7	56034426	56034806	AACATAGTGGAGGGG	947.094
chr17	27570309	27570752	AACATATAAATGTCA	813.236
chr6	24547496	24547934	AACATATAGGCCATT	814.807
chr18	16949796	16950230	AACATATCGGTTACC	620.436
chr7	106514568	106515020	AACATATTACTGGCC	314.072
chr7	16493093	16493626	AACATCAAGATCATC	2.56618
chr12	8451832	8452299	AACATCAAGGGCTGA	2.56618
chr19	40800682	40801048	AACATCACCGTACTC	621.596
chr12	31019338	31019841	AACATCACCTAGTGT	2.56618
chr1	153443662	153444179	AACATCACCTCCAAG	2.56618
chr3	37450499	37450969	AACATCATATAACAC	317.794
chr18	64934995	64935479	AACATCATTTCCCCG	787.187
chr19	44161453	44162081	AACATCCAAAACGAG	911.964
chr13	55292674	55292988	AACATCCAAACTTAT	2.56618
chr1	52479065	52479548	AACATCCATTCCCCA	631.742
chr15	34264608	34265065	AACATCCGTTGAAGC	2.56618
chr10	11038111	11038325	AACATCCTAGTACGC	1101.05
chr8	60017112	60017543	AACATCCTCGCTCTA	829.861
chr3	10127807	10128273	AACATCTCTCCGTAG	668.233
chr12	9927146	9927577	AACATGAAAAGCAAC	2.56618
chr9	46007874	46008257	AACATGAATGCGCGG	2.56618
chr5	116895328	116895917	AACATGACTGATAAC	597.768
chr15	3590058	3590520	AACATGAGCCAACGC	400.168
chr4	101065749	101066162	AACATGCACCAGAGC	2.56618
chr2	167284808	167285183	AACATGCGGCGTTTC	2.56618
chr14	70938329	70938852	AACATGCGTATATCT	2.56618
chr16	28402447	28402911	AACATGCTGCCAGGG	707.463
chr5	104556968	104557500	AACATGGAAGTAACT	646.646
chr15	59485508	59485947	AACATGGAGTATTGA	2.56618
chr8	128558828	128559273	AACATGGGAGTGAAC	729.31
chr1	34186706	34187149	AACATGTATGACGTC	2.56618
chr2	75268083	75268557	AACATGTGCCTGTCG	2.56618
chr2	94169636	94169999	AACATGTGTCTTGTC	2.56618
chr14	48251968	48252484	AACATTCCACATAGC	2.56618
chr9	30090603	30091050	AACATTCCATTGGCC	656.567
chr7	112665177	112665653	AACATTCCTCCGTCT	874.431
chr2	129652185	129652699	AACATTCCTCGGGTT	849.95
chr4	117795436	117795851	AACATTCGCTAGCGC	878.828
chr12	107258134	107258566	AACATTGGTTTAGTA	912.057
chr18	49870969	49871466	AACATTTCCAACCGG	672.435
chr12	10521182	10521648	AACATTTCTGCCGAA	2.56618
chr3	42212731	42213303	AACATTTCTTCCTAG	591.225
chr5	120981518	120982064	AACATTTGAGCCAAA	2.56618
chr19	41226780	41227217	AACATTTGCTAGTTG	201.049
chr5	30879823	30880203	AACATTTTTGGCTGG	2.56618
chr18	20313837	20314263	AACCAAAAAAGGTGC	2.56618
chr4	15076737	15077254	AACCAAAAAGTTGGT	640.584
chr6	118674758	118675222	AACCAAAACAGCGAT	1006.93
chr11	93135229	93135553	AACCAAACACTGCAT	661.43
chr16	57863509	57863912	AACCAAAGATTTTTG	867.604
chr4	19919137	19919553	AACCAAATGAACACA	448.501
chr14	79518896	79519313	AACCAACACACGTCC	2.56618
chr18	66320066	66320648	AACCAACATAGAACG	646.646
chr9	42558954	42559482	AACCAACATGAGCCC	2.56618
chr11	51581671	51582039	AACCAACCACTGAGA	594.289
chr15	30824884	30825297	AACCAACCCGTCCCA	2.56618
chr4	101677948	101678402	AACCAACGATTCCGA	813.493
chr3	55247571	55248176	AACCAACGCAACATT	2.56618
chr7	86403872	86404342	AACCAACGTCAGTGT	821.049
chr1	82176967	82177433	AACCAACGTCCAAGT	995.486
chr14	19795760	19796319	AACCAACTCAAATT	516.894
chr16	78309655	78310081	AACCAACTCTTATAC	2.56618
chr9	118941042	118941407	AACCAACTTACTGAC	724.021
chr10	40061804	40062385	AACCAAGAGCAACAA	851.175
chr10	39186893	39187445	AACCAATACAGGCTG	833.654
chr7	88732265	88732674	AACCAATTAGTCTCT	2.56618
chr9	42087780	42088269	AACCAATTATGATCG	512.435
chr2	156111137	156111551	AACCACAAAAAAGAC	521.828
chr6	115188519	115189009	AACCACAATATATTC	2.56618
chr8	49630980	49631462	AACCACACCTCCTAG	690.544
chr6	24566875	24567363	AACCACACGAGGCCC	2.56618
chr2	12939607	12940119	AACCACAGAATTAAC	2.56618
chr8	46349849	46350459	AACCACCACTCTGCC	2.56618
chr10	13216151	13216647	AACCACCAGGGATTT	2.56618
chr18	32078187	32078747	AACCACCATACCGGC	2.56618
chr14	61977132	61977637	AACCACCCAGTTACT	2.56618
chr2	128333048	128333658	AACCACCCATACTCA	959.783
chr2	154391442	154391838	AACCACCCCGGACCT	2.56618
chr1	17050101	17050669	AACCACCCCGGGGGC	824.015
chr16	40228506	40229090	AACCACCCTGTTACA	583.386
chr9	56375781	56376381	AACCACCGCTCTATT	2.56618
chr4	132664700	132665208	AACCACCGGACACTC	459.872
chr9	65994075	65994433	AACCACCTCACCCGA	203.743
chr1	137903786	137904309	AACCACCTCAGAGTT	357.064
chr15	73553165	73553605	AACCACCTCTGCCCC	843.599
chr11	106363548	106364120	AACCACCTGACGTGT	863.054
chr17	71829800	71830220	AACCACCTGAGACTC	850.354
chr2	65496373	65497005	AACCACCTGCGTTAA	658.712
chr18	73294606	73295131	AACCACGAACACAAA	950.232
chr9	108039344	108039880	AACCACGCATGTAGA	535.483
chr11	3621657	3622127	AACCACGCCACTCTA	977.505
chr15	23326390	23326817	AACCACGCCTGCACA	2.56618
chr2	153789100	153789499	AACCACGTTACTAGT	813.32
chr15	34264673	34265267	AACCACTAAATCTGT	2.56618
chr8	48869874	48870322	AACCACTATACATGC	364.923
chr6	95886259	95886721	AACCACTCTTGATAC	532.905
chr4	63590625	63591021	AACCACTGCAGTACA	255.383
chr2	50148946	50149379	AACCAGCACGCGCAT	2.56618
chr10	96852396	96852821	AACCAGCGCTCGGTG	2.56618
chr11	97468537	97468935	AACCAGCTCACGATC	2.56618
chr9	44126184	44126604	AACCAGCTCCCGAGT	668.547
chr10	123283704	123284077	AACCAGGCAACAAAG	2.56618
chr13	44424709	44425120	AACCAGGCAATAGAC	979.871
chr6	113217221	113217718	AACCAGGGGAGGACA	851.11
chr18	43020435	43020943	AACCAGTACGACCAA	389.726
chr4	53528865	53529452	AACCAGTAGGGACTA	2.56618
chr16	9993973	9994352	AACCAGTCCCAATGT	629.533
chr14	57855419	57855921	AACCAGTTCAGCCAC	1018.25
chr8	107133888	107134533	AACCATAAACAGTGA	2.56618
chr2	180435809	180436394	AACCATACCCCAAAA	672.757
chr10	127388308	127388818	AACCATAGAGAATGT	2.56618
chr16	23191456	23191848	AACCATATATTACGA	273.081
chr2	180217524	180218058	AACCATATCGATTCA	866.454
chr11	117419139	117419529	AACCATATGCATTGA	2.56618
chr2	41837869	41838340	AACCATATTGGGTCG	2.56618
chr8	41754652	41755099	AACCATCAAGTACAC	778.288
chr3	106975433	106975988	AACCATCAATAACGG	2.56618
chr1	133247876	133248355	AACCATCAATCCCTG	2.56618
chr16	36559709	36560026	AACCATCCGTTACTC	2.56618
chr11	67495670	67496115	AACCATCCTCCGATG	918.281
chr10	74980321	74980735	AACCATCCTGCGCAC	1171.85
chr14	61050327	61050764	AACCATCGAGTCTCA	479.101
chr5	73730883	73731285	AACCATCGTTTACAT	371.062
chr11	35776794	35777229	AACCATCTGATATTC	192.013
chr5	65465911	65466418	AACCATCTTCCACAC	2.56618
chr10	11037871	11038475	AACCATGAATTACAA	978.998
chr1	157655587	157656032	AACCATGACCCCTAA	1039.31
chr7	70701291	70701699	AACCATGACGGGAGC	632.211
chr9	62319378	62319865	AACCATGAGAGTGTT	424.847
chr4	55674800	55675203	AACCATGCCCTCCTA	636.245
chr10	73324913	73325280	AACCATTAAGGGCAC	574.998
chr7	52419622	52420161	AACCCAACCAACGTT	411.128
chr4	141682932	141683455	AACCCAACCGCGACT	826.337
chr9	100460987	100461401	AACCCAATACCTAGC	2.56618
chr18	65675207	65675611	AACCCAATCAATATGG	959.755
chr1	153443604	153444097	AACCCACACACATCG	557.98
chr17	4641115	4641720	AACCCACACCTCCTG	873.067
chr10	80869108	80869673	AACCCACCCCACCAC	763.322
chr9	24224265	24224719	AACCCACCCCCAAGC	660.206
chr15	96871435	96872007	AACCCACCGTTTCCT	730.804
chr19	4032727	4033196	AACCCACCTATACAA	2.56618
chr8	41754579	41755010	AACCCACCTGATCTG	583.86
chr9	96727870	96728361	AACCCACGACTTGCC	705.348
chr8	117124193	117124622	AACCCACGTATGAAA	712.441
chr5	130950747	130951166	AACCCACTCGTCTCT	2.56618
chr18	25006833	25007336	AACCCACTTGCGCCG	859.066
chr19	6662495	6663045	AACCCAGCGCAGTAT	2.56618
chr2	131227467	131227994	AACCCAGCTTAGAAA	2.56618
chr4	64292958	64293548	AACCCAGTTCTGACG	303.944
chr15	51079460	51079866	AACCCATCAAATGAC	959.251
chr10	115438827	115439348	AACCCATCTAGCCTT	2.56618
chr7	90899425	90900028	AACCCATTAATCCGT	900.966
chr15	26306896	26307431	AACCCATTTGCGCGA	2.56618
chr9	25136682	25137317	AACCCATTTTCTTTC	869.258
chr3	21905636	21906094	AACCCCACCCGACCA	630.046
chr6	59401239	59401758	AACCCCACGAAGTCC	2.56618
chr13	59039911	59040286	AACCCCACGCCGGAA	319.109
chr1	51939913	51940428	AACCCCAGTGACTTG	2.56618
chr2	124466863	124467296	AACCCCAGTGTTCCA	454.171
chr15	66737918	66738442	AACCCCATACACTTC	818.241
chr8	109358949	109359341	AACCCCATATTAAAT	2.56618
chr2	157656316	157656840	AACCCCATCACACTG	2.56618
chr18	64934908	64935427	AACCCCATCGATTCC	732.558
chr7	16998279	16998768	AACCCCATCTCACTC	2.56618
chr11	89861730	89862177	AACCCCCAAATTCCA	2.56618
chr5	104557208	104557543	AACCCCCAATAAACA	2.56618
chr5	122544350	122544779	AACCCCCACGCAATG	2.56618
chr12	112044832	112045305	AACCCCCAGCACGGT	870.318
chr7	116105388	116105871	AACCCCCATCCCTCT	463.101
chr12	104600805	104601239	AACCCCCCACAACTT	575.925
chr7	73153415	73153872	AACCCCCCCTTGTAT	2.56618
chr6	113378043	113378514	AACCCCCCGCTGATC	2.56618
chr1	137435278	137435750	AACCCCCCGTCTCAT	2.56618
chr5	107611623	107612033	AACCCCCCTACCTGC	2.56618
chr1	122150429	122151033	AACCCCCCTATCCGA	2.56618
chr4	7122867	7123361	AACCCCCGCTCTCAA	844.767
chr2	181258501	181258941	AACCCCCGTAAGGCG	2.56618
chr9	102874757	102875286	AACCCCCGTACCAAA	580.229
chr12	99691293	99691774	AACCCCCGTCTCATG	2.56618
chr1	170164338	170164772	AACCCCCTCCCCTGG	472.294
chr12	105642213	105642589	AACCCCGACTGGATC	2.56618
chr2	156734859	156735297	AACCCCGAGTCTGAA	751.637
chr8	42220379	42220833	AACCCCGCCCGGCTG	466.148
chr10	76436416	76436943	AACCCCGCCGGTTAC	877.194
chr1	188223876	188224230	AACCCCGCGAATCCA	309.855
chr6	146285959	146286396	AACCCCGGCGAGACA	640.682
chr11	5326497	5326961	AACCCCGGCTAACAC	2.56618
chr2	157656249	157656818	AACCCCTAGGGACAG	2.56618
chr6	142834067	142834522	AACCCCTCTCACGAT	297.633
chr9	57793339	57793703	AACCCCTGGTCACCG	751.294
chr13	12429940	12430457	AACCCCTTGAAGGCC	2.56618
chr9	71436932	71437415	AACCCGAACTAGAAC	300.925
chr6	23258534	23258897	AACCCGACCACGTTT	2.56618
chr3	83255133	83255690	AACCCGATCATTGCT	774.894
chr3	19544139	19544551	AACCCGATGGATGAC	2.56618
chr18	39331870	39332327	AACCCGCATAACCAC	929.089
chr11	98917364	98917915	AACCCGCCGGCATAG	716.233
chr10	84426421	84426806	AACCCGCCTTACGCT	916.181
chr19	40406540	40406909	AACCCGCTCCACTTC	2.56618
chr18	44715353	44715752	AACCCGGCAACGGGG	2.56618
chr16	96339435	96340089	AACCCGTAATAGATC	806.993
chr4	151673521	151674028	AACCCGTCCAGACTA	395.806
chr2	177865400	177865869	AACCCGTGCCGCTAG	2.56618
chr8	41754776	41755236	AACCCTAAACACCCT	269.359
chr7	121170904	121171375	AACCCTAATATACGC	2.56618
chr6	142470395	142470867	AACCCTACACACGGA	2.56618
chr9	96342013	96342558	AACCCTACAGTACGC	424.15
chr10	23431145	23431512	AACCCTACCTGCCCA	2.56618
chr4	117543734	117544115	AACCCTACGCAACGG	2.56618
chr3	95017433	95017954	AACCCTAGTAATATG	2.56618
chr1	176861252	176861661	AACCCTATACTCGAC	2.56618
chr4	128398538	128399025	AACCCTCAATCACGT	417.175
chr16	78309493	78309965	AACCCTCCTCCCTGC	689.771
chr11	81875766	81876172	AACCCTCGGAAAATC	857.938
chr13	49267443	49267900	AACCCTCTAACGCGG	417.957
chr11	4017371	4017966	AACCCTCTACACCTC	2.56618
chr8	113483787	113484308	AACCCTCTATAAACG	2.56618
chr5	88990412	88990845	AACCCTCTGCGATGC	853.575
chr19	41422594	41422949	AACCCTGGCAGGAAC	549.469
chr7	140478554	140479007	AACCCTGGTATCAGA	952.637
chr3	121756238	121756675	AACCCTTACGCCGCC	2.56618
chr14	8832596	8833018	AACCCTTATACTGAC	682.173
chr6	119130156	119130649	AACCCTTCCAGAAAC	328.362
chr8	26531724	26532153	AACCCTTGCCCATGG	609.871
chr16	31647456	31647910	AACCCTTTAGGGAAA	2.56618
chr4	87842072	87842592	AACCCTTTATAGAGT	427.822
chr8	38485657	38486037	AACCGAAAGAAGAAT	766.566
chr10	94824113	94824589	AACCGAATCCCTATT	186.79
chr7	88732186	88732817	AACCGAATCGTTGTC	791.614
chr8	67137952	67138286	AACCGAATTTCAAAC	394.392
chr19	22957192	22957835	AACCGACACCCTTAA	952.522
chr6	24566474	24566961	AACCGACAGAGATGT	2.56618
chr7	16998384	16998896	AACCGACCGACTTGC	868.036
chr6	113217198	113217655	AACCGACGACAACGC	2.56618
chr9	68250652	68251163	AACCGACGGAAACTA	518.717
chr4	141207478	141207876	AACCGACTACTTCAA	396.951
chr2	119880365	119880800	AACCGACTCACTACC	417.769
chr7	100130481	100130861	AACCGACTCCAGTTGT	2.56618
chr15	30824841	30825181	AACCGAGAAAACTCC	372.185
chr13	59658923	59659317	AACCGAGATGAACCC	695.747
chr10	42654325	42654764	AACCGAGCGGCCTAC	2.56618
chr2	180218018	180218456	AACCGAGGGCAAGGG	2.56618
chr17	27570337	27570659	AACCGATAACCAAAG	2.56618
chr9	61275700	61276137	AACCGATCCCCCCCC	763.791
chr17	91312568	91313024	AACCGATGTACCGAG	484.882
chr12	83173531	83174090	AACCGATTATCGAGT	1033.16
chr9	42087610	42088030	AACCGCATGTTCAGT	2.56618
chr18	51324767	51325145	AACCGCCAACAACAA	2.56618
chr7	107810812	107811244	AACCGCCATCAACAC	2.56618
chr3	105457166	105457560	AACCGCCTATTGTAT	520.541
chr10	44184357	44184806	AACCGCCTCTCCCCA	2.56618
chr10	96852638	96853156	AACCGCCTTGCGATT	657.669
chr1	189272898	189273430	AACCGCGATATCACA	2.56618
chr19	53863978	53864554	AACCGCTAACAGCGG	553.437
chr5	125810367	125810795	AACCGCTAAGGATGA	2.56618
chr4	150471266	150471683	AACCGCTGATTTCAC	766.636
chr13	42834288	42834715	AACCGCTGGAGCTAA	497.726
chr9	61275869	61276258	AACCGCTTATAACAG	2.56618
chr15	51079443	51079914	AACCGGAAACTCGGG	2.56618
chr14	70938174	70938761	AACCGGCATCAAAGC	2.56618
chr1	17049789	17050355	AACCGGCGCCCTTTA	385.435
chr16	8603637	8604236	AACCGGCTCTGGTAT	2.56618
chr8	127905486	127905929	AACCGGGCACAACGC	685.816
chr3	115888303	115888746	AACCGGGGCTCGAGG	508.496
chr17	48691032	48691461	AACCGGGTCATTCTG	799.633
chr6	59401113	59401653	AACCGGTACTAGGTA	906.432
chr6	50606040	50606443	AACCGGTTGCTTGGT	2.56618
chr5	77560670	77561183	AACCGTAACCTTCTT	2.56618
chr3	103452205	103452676	AACCGTACACACAGC	644.516
chr5	103020274	103020795	AACCGTACATGCAAG	2.56618
chr14	70753256	70753710	AACCGTACCACGAAG	919.466
chr6	95886691	95887160	AACCGTACTACCCCA	2.56618
chr2	138414689	138415116	AACCGTATATTCATA	302.894
chr2	14851602	14852199	AACCGTATGGTACTA	2.56618
chr1	193601123	193601788	AACCGTCATCCGACC	240.057
chr5	34612149	34612413	AACCGTCCACTGTTC	2.56618
chr12	81899238	81899717	AACCGTCCATCCACA	2.56618
chr13	44548479	44548827	AACCGTCGCTCAAAG	848.544
chr4	148290480	148290992	AACCGTCTACTACGA	426.536
chr9	75156212	75156676	AACCGTCTCCGCTTA	590.684
chr14	77197495	77197996	AACCGTGCAACAAAT	342.983
chr1	28271027	28271487	AACCGTGGGTTGGAC	837.599
chr8	115105262	115105729	AACCGTTATATAAAA	2.56618
chr5	39610721	39611306	AACCGTTCTTCTAAG	542.678
chr4	32657680	32658283	AACCGTTGAATTTTA	2.56618
chr16	38361991	38362399	AACCGTTGACTCGTA	2.56618
chr8	23576327	23576724	AACCGTTTTTCTATC	2.56618
chr6	113217091	113217504	AACCTAAAACATGAT	313.952
chr5	44471547	44472137	AACCTAAACATCGAA	854.183
chr1	107360413	107360882	AACCTAAACCATGAG	851.849
chr13	12430240	12430650	AACCTAAATTAGGGG	2.56618
chr2	103686975	103687400	AACCTAACCCCAGTT	783.021
chr1	190889331	190889793	AACCTAACCTCAACC	567.226
chr4	150471182	150471622	AACCTAACGGCCTCT	2.56618
chr5	92058348	92058890	AACCTAAGACTGAGT	527.001
chr10	22607205	22607615	AACCTAAGCCTAGGT	528.572
chr2	38358240	38358660	AACCTAATAATGGAC	427.822
chr9	108040108	108040715	AACCTACATACCGAC	2.56618
chr3	146232908	146233486	AACCTACCATTGGCC	698.809
chr12	32198585	32199032	AACCTACCCAATCCT	2.56618
chr4	47651621	47652111	AACCTACCTAGCACC	2.56618
chr8	14748621	14749186	AACCTACGACTGCGC	830.806
chr7	15023862	15024207	AACCTACGCCTCCGG	777.21
chr4	97809598	97809968	AACCTACGGAATACG	2.56618
chr14	70422767	70423273	AACCTACTACCATAA	620.285
chr6	85465712	85466300	AACCTAGAATCTCAC	597.427
chr4	6189944	6190341	AACCTAGCGTACCCA	2.56618
chr11	106373097	106373561	AACCTAGCGTTTATA	834.98
chr11	35788117	35788524	AACCTAGTTGCACAT	2.56618
chr12	87848435	87848981	AACCTATGCAAATTC	2.56618
chr5	104665639	104666094	AACCTCAACCAGCAC	2.56618
chr11	36379618	36380126	AACCTCACCCCCACC	2.56618
chr2	101488783	101489370	AACCTCAGGTTTCTG	952.284
chr3	146232976	146233491	AACCTCATACAACCA	665.963
chr1	76100750	76101175	AACCTCATCATCCCT	985.779
chr2	50545749	50546226	AACCTCATGTATGCA	1015.85
chr15	99174845	99175257	AACCTCCACACTCCT	811.831
chr4	102406842	102407410	AACCTCCCACGCATA	2.56618
chr2	44489658	44490079	AACCTCCCGCCAGAC	621.17
chr9	121811153	121811573	AACCTCCCTCCACAT	2.56618
chr18	44715650	44716191	AACCTCCCTCCCCCA	652.311
chr4	116079180	116079590	AACCTCCCTCTAGAC	609.076
chr16	82661300	82661771	AACCTCCGCTCCACA	853.198
chr5	150185001	150185364	AACCTCCGGGGCCGA	2.56618
chr17	25858411	25858813	AACCTCGAAACCCGA	562.723
chr8	60017080	60017571	AACCTCGAAAGACGT	2.56618
chr1	92572848	92573280	AACCTCGGGGTGGCG	822.325
chr8	41755100	41755551	AACCTCGTTGTTCTA	795.417
chr5	21992475	21993056	AACCTCTACGCTACC	2.56618
chr14	64812680	64813110	AACCTCTGCATAAAC	450.09
chr6	118029866	118030401	AACCTCTTCAAGCTT	659.528
chr11	83555408	83555869	AACCTCTTTTCTAAC	2.56618
chr9	41006385	41006824	AACCTGACTCACCTG	2.56618
chr10	67165471	67165927	AACCTGAGATGTATG	865.452
chr8	73916801	73917268	AACCTGAGGGGCCAT	946.74
chr13	9075121	9075497	AACCTGAGTGAGGGC	415.171
chr7	122610184	122610567	AACCTGATGCGGCTG	907.474
chr19	29587948	29588375	AACCTGCAGCCTCAC	2.56618
chr6	117122443	117122790	AACCTGGCGCCCTGA	789.175
chr6	119130164	119130756	AACCTGGTGACCGGA	2.56618
chr15	97961594	97962070	AACCTGTGCATAGAT	2.56618
chr5	90301691	90302092	AACCTGTTACAATCG	620.064
chr1	40212641	40213149	AACCTGTTAGCCGCA	2.56618
chr12	40043607	40044126	AACCTGTTGACGTAC	415.63
chr15	93150200	93150653	AACCTGTTTTTTATA	761.612
chr5	135576741	135577272	AACCTTAAGCCGGCG	662.288
chr12	74488090	74488685	AACCTTACTTTCCGA	848.452
chr18	20218944	20219360	AACCTTATAAGTATA	804.738
chr4	53152313	53152669	AACCTTATAGTTCCC	785.857
chr1	17049795	17050193	AACCTTCAACTAACC	694.398
chr11	63664469	63664839	AACCTTCACTCCGTC	498.123
chr9	49413577	49414109	AACCTTCCAGAGCTG	2.56618
chr15	99300424	99300846	AACCTTCCATTCCCT	2.56618
chr18	24493533	24494070	AACCTTCTTGTGATT	292.314
chr19	23099344	23099763	AACCTTGAAGAAAGC	1027.71
chr2	141443641	141444155	AACCTTGATTCATCA	2.56618
chr11	7092535	7092927	AACCTTGCGTCGCCG	2.56618
chr2	180217718	180218138	AACCTTGGCCATTTG	992.499
chr11	118596650	118597183	AACCTTTAATGTTAC	424.548
chr3	138528312	138528733	AACCTTTCCGGCTGT	618.552
chr5	147588389	147588881	AACCTTTGGTTCGTC	448.238
chr3	21171125	21171614	AACCTTTTTAAACGC	310.661
chr19	56810697	56811093	AACGAAACATACCAG	594.982
chr3	82210344	82210850	AACGAAACCTTCTGT	794.825
chr17	86902674	86903174	AACGAAACGAGTTCT	2.56618
chr2	68306590	68307226	AACGAAACGGGGAGA	2.56618
chr1	72182611	72182989	AACGAAAGACCCGCC	398.694
chr6	119146470	119146965	AACGAAAGCAACCTT	714.558
chr5	120981693	120982150	AACGAAATACACCTT	2.56618
chr15	54697712	54698183	AACGAAATGGTAACC	2.56618
chr4	98715262	98715706	AACGAAATGGTCATG	893.31
chr9	46007646	46007993	AACGAACCCCCAGTA	667.412
chr5	68541091	68541620	AACGAACCCCTTCCT	630.716
chr4	147735191	147735647	AACGAACGCTCCCAG	2.56618
chr2	94169435	94169935	AACGAACTGACCCTA	628.918
chr6	117247822	117248361	AACGAAGAAACCACT	2.56618
chr8	36274602	36275115	AACGAAGCGGGTTGG	2.56618
chr2	144345559	144346019	AACGAAGTGTTATAT	2.56618
chr17	28575387	28575969	AACGAATCACCAAGC	797.365
chr8	27208522	27209004	AACGAATGGATCTGC	489.434
chr18	65675370	65675848	AACGAATGGGGACCA	427.453
chr11	16642202	16642597	AACGAATTGGCTCTA	846.823
chr19	8958207	8958732	AACGACAAACGGCAA	637.723
chr5	147101840	147102315	AACGACAAGCTGACG	501.01
chr10	44184437	44184939	AACGACAAGTGAAAC	895.396
chr15	88934479	88935057	AACGACAATATATGG	915.033
chr10	53057096	53057621	AACGACAATCCCCTC	621.99
chr2	50148936	50149464	AACGACCACTGATCA	2.56618
chr2	77356835	77357382	AACGACCATGCTCTC	750.587
chr10	90415639	90415991	AACGACCCAAATACG	2.56618
chr10	92861232	92861705	AACGACCTCATTAGC	673.056
chr19	37516695	37517269	AACGACGAACAGTAG	870.73
chr10	93531575	93532159	AACGACGATCTTAAA	2.56618
chr15	79952216	79952648	AACGACGGCGAACTT	2.56618
chr19	26839974	26840349	AACGACTCGTACACA	2.56618
chr8	125378848	125379381	AACGACTCTGCAGCA	558.614
chr11	29513081	29513492	AACGACTCTGCATCC	2.56618
chr1	172629749	172630176	AACGACTGATGGAAG	329.829
chr7	103688077	103688592	AACGAGAAACAGGGT	818.499
chr4	131607356	131607809	AACGAGACCAGTTTC	867.272
chr5	73731029	73731394	AACGAGACGAGACCG	2.56618
chr8	121404058	121404663	AACGAGATTGCCGTG	420.873
chr15	10178893	10179381	AACGAGCCCTTTACC	834.167
chr15	31021701	31022092	AACGAGCCTGACCGA	843.597
chr6	50316453	50316856	AACGAGCCTTTACGA	372.185
chr9	41006862	41007311	AACGAGCGCTGGTTG	2.56618
chr1	90175481	90175890	AACGAGCTGGTCAAA	416.787
chr4	53486589	53487024	AACGAGGCAACTTGG	865.33
chr8	4256839	4257251	AACGAGGCCCACAAA	1137.19
chr19	9186497	9186915	AACGAGGGTGTGTCG	472.955
chr11	98917262	98917717	AACGAGTAAGAATTA	2.56618
chr7	143569450	143569885	AACGAGTATATTTTG	656.596
chr10	37627563	37628003	AACGAGTCTCACTTA	2.56618
chr16	96339809	96340382	AACGAGTTAGCGGTA	2.56618
chr4	41691617	41692081	AACGAGTTCTCATTT	360.134
chr9	79813262	79813846	AACGATACAAGCTAC	668.027
chr9	74648803	74649286	AACGATAGGGGTACT	795.726
chr5	116895399	116895869	AACGATATCTGTGGT	2.56618
chr4	117795318	117795857	AACGATCCAAGCTAC	2.56618
chr5	142615911	142616278	AACGATCCCCTGGCT	903.583
chr14	61969728	61970171	AACGATGCCCTGCAG	359.1
chr12	100673301	100673698	AACGATGCCTCTCGC	2.56618
chr7	122610324	122610800	AACGATTACATGTGC	668.149
chr15	89205540	89205997	AACGATTCGTGCAGT	767.555
chr5	107491391	107491767	AACGCAAAGCCTGTT	788.766
chr9	41006682	41007052	AACGCAAATTTCATC	2.56618
chr11	118596862	118597247	AACGCAAGAAGACAT	2.56618
chr3	85001129	85001552	AACGCAAGTGCCTCA	2.56618
chr6	82701488	82701920	AACGCAATGAGCATG	2.56618
chr15	11676411	11676852	AACGCACCACTATTC	2.56618
chr11	6189906	6190505	AACGCACCATAGAAA	2.56618
chr4	9442126	9442614	AACGCACGTCTGTTA	2.56618
chr2	145873741	145874184	AACGCACTTACATCC	2.56618
chr5	90914590	90914998	AACGCACTTGACCTA	2.56618
chr7	73424868	73425371	AACGCATTCCCATCC	515.695
chr14	121651850	121652379	AACGCCAAATTATAA	2.56618
chr7	82443850	82444298	AACGCCACAACCGGG	470.334
chr6	29165321	29165837	AACGCCACAATATCG	2.56618
chr1	22519143	22519718	AACGCCACACATCCG	238.02
chr19	40261530	40262006	AACGCCATAGCCTAC	2.56618
chr1	94926165	94926534	AACGCCCACCACCCG	2.56618
chr12	104873858	104874358	AACGCCCACTAGGTA	737.61
chr3	115315509	115316166	AACGCCCCACTCACG	2.56618
chr14	64319102	64319639	AACGCCCCCAGACAA	2.56618
chr16	18124228	18124653	AACGCCCCGAATTTT	2.56618
chr9	67011507	67011976	AACGCCCCGCTTCCG	2.56618
chr14	66596129	66596617	AACGCCCCGGCAACC	642.106
chr3	106975454	106975872	AACGCCCTCTCCTCA	254.054
chr12	113828960	113829529	AACGCCCTGACTTCA	685.448
chr6	117249977	117250430	AACGCCGAACCCTCA	677.047
chr5	116895670	116896088	AACGCCGAATTTGTT	2.56618
chr11	118744505	118744910	AACGCCGAGGTCGTG	2.56618
chr19	23099073	23099621	AACGCCGCCCCGACT	2.56618
chr2	50148847	50149320	AACGCCGCTCACTCT	2.56618
chr1	83244783	83245232	AACGCCGCTTCATAG	551.197
chr2	103690365	103690690	AACGCCGGCCCTACA	1017.97
chr4	102482934	102483386	AACGCCGTCTAGCCA	2.56618
chr7	85535011	85535530	AACGCCGTGAAGTGA	2.56618
chr8	48869562	48870134	AACGCCTATCGCGAC	2.56618
chr12	103453466	103453957	AACGCCTCCCCCACG	2.56618
chr14	47235687	47236241	AACGCCTCCTTTGCA	419.109
chr7	104535012	104535426	AACGCCTCGCCGAGG	474.694
chr11	70830363	70830927	AACGCCTCGGTTCTA	358.807
chr5	102218526	102219092	AACGCGAAACGTGGA	2.56618
chr13	21124907	21125368	AACGCGACACTGGAG	2.56618
chr5	25042491	25043135	AACGCGACCACATTT	2.56618
chr6	122458407	122458883	AACGCGACGGCTTCA	2.56618
chr18	44470748	44471158	AACGCGAGCAGTATA	209.945
chr6	8308579	8309047	AACGCGATCTTAGGG	2.56618
chr11	51581712	51582157	AACGCGGTGGCCTGG	2.56618
chr6	145670943	145671567	AACGCGTACGTGCAT	2.56618
chr10	77542710	77543228	AACGCGTAGTGCAAC	2.56618
chr8	37469672	37470128	AACGCGTCCACCTGA	1000.53
chr12	45960328	45960835	AACGCGTGTTCTAAC	811.393
chr1	90109412	90109902	AACGCTACGCTCCTC	1037.46
chr4	81069433	81069961	AACGCTACTCAATCC	2.56618
chr12	100268135	100268634	AACGCTAGAGCTGAT	567.675
chr19	31945699	31946225	AACGCTCACGGTGTA	552.541
chr3	85202126	85202712	AACGCTCACTTCGCA	2.56618
chr3	118193889	118194330	AACGCTCCGCGTTTA	2.56618
chr4	53528827	53529373	AACGCTCGCAATGCC	2.56618
chr9	102178303	102178667	AACGCTCGCTCGCTT	610.214
chr5	138416059	138416465	AACGCTCGCTTTTCA	632.391
chr17	84505578	84506027	AACGCTCTCTAACTT	2.56618
chr2	153241133	153241598	AACGCTCTTGAAAGC	944.084
chr12	55483087	55483522	AACGCTGACTGCGGT	732.826
chr17	26224065	26224578	AACGCTGCATCTCCA	2.56618
chr9	25136747	25137207	AACGCTGGCACGACC	833.764
chr6	24566877	24567463	AACGCTGTACGCTGC	2.56618
chr13	24456872	24457319	AACGCTTCGACCCCC	2.56618
chr9	108982867	108983412	AACGCTTCTGGGAAG	632
chr10	19914789	19915248	AACGCTTGTTTTTGG	690.703
[truncated: 37,511 more rows]

## Sheet: HiSeq_cortex_3
track name="HiSeq_cortex_3" description="Cortex_replicate_3" useScore=1 visibility=squish
[truncated: 38,826 more rows]

[truncated: 5 more sheets: HiSeq_retina_1, HiSeq_retina_2, HiSeq_retina_3, HiSeq_avg_cortex_signal, HiSeq_avg_retina_signal]
